# Supplementary material for: Cellular population dynamics shape the route to human pluripotency
Source: Research Square preprint supplement (doi:10.21203/rs.3.rs-301720/v1), 2022-11-10
Supplement: Supplementary file 1 [file 6001137aed135c701e5134d8.xlsx]

## Sheet: Table S1
Table S1. Secreted proteins.												Log2(TMT intensity ratio respect to 1st time point)
Gene Symbol	Uniprot ID	Entrez ID	Peptides (repl. 1)	Peptides (repl. 2)	Peptides (repl. 3)	Unique peptides (repl. 1)	Unique peptides (repl. 2)	Unique peptides (repl. 3)	Sequence coverage (repl. 1)	Sequence coverage (repl. 2)	Sequence coverage (repl. 3)	D1-D2 Repl.1	D1-D2 Repl.2	D1-D2 Repl.3	D3-D4 Repl.1	D3-D4 Repl.2	D3-D4 Repl.3	D5-D6 Repl.1	D5-D6 Repl.2	D5-D6 Repl.3	D7-D8 Repl.1	D7-D8 Repl.2	D7-D8 Repl.3	D9-D10 Repl.1	D9-D10 Repl.2	D9-D10 Repl.3	D11-D12 Repl.1	D11-D12 Repl.2	D11-D12 Repl.3	D1-D2 (mean)	D3-D4 (mean)	D5-D6 (mean)	D7-D8 (mean)	D9-D10 (mean)	D11-D12 (mean)
HDGFL3	A0A024R216	50810	5	4	5	4	3	4	27.1	23.2	27.1	0	0	0	-0.0764729	-0.705943	-0.0796541	-0.055794	-0.940796	-0.459725	0.41589	-0.567236	0.173171	0.798724	0.0300049	0.558694	0.356521	-0.363248	0.373806	0	-0.287356	-0.485438	0.00727515	0.462474	0.122359
NUCB2	P80303	4925	19	21	19	18	21	17	50	53.8	43.1	0	0	0	-0.556515	-0.254096	-0.37073	-0.202924	0.00194298	-0.260769	0.323069	0.354691	0.207755	0.491125	0.73433	0.519132	0.38255	0.741822	0.474359	0	-0.39378	-0.153917	0.295172	0.581529	0.53291
COL1A2	P08123	1278	34	36	35	34	36	35	31.3	31.6	32.5	0	0	0	-0.811221	-0.222263	-0.274731	0.157679	0.327961	0.15882	0.756401	0.745728	0.310791	0.965517	1.03554	0.758045	1.0597	1.09934	0.961632	0	-0.436071	0.21482	0.604306	0.919701	1.04022
NBL1	A0A087WTY6	4681	2	3	3	2	3	3	14.1	19.5	19.5	0	0	0	-0.702792	-0.513252	-0.397202	-0.182216	-0.25539	-0.242955	0.145956	-0.0976935	0.0836772	-0.0562085	-0.065385	0.0525014	-0.0280958	0.0909988	0.146695	0	-0.537749	-0.226854	0.0439799	-0.0230307	0.0698659
CDH1	P12830	999	0	3	4	0	2	3	0	5.4	7.1		0	0		-5.11915	-1.9931		-4.81083	-2.22802		-3.54454	-1.51113		-1.9056	0.769866		-0.751235	1.65004	0	-3.55612	-3.51942	-2.52783	-0.567867	0.449404
FGF2	A0A087WUF6	2247	6	5	5	6	5	5	19.1	16	16.7	0	0	0	-1.4502	-1.14551	-0.538811	-1.4554	-1.80035	-1.13908	-1.35677	-1.63874	-1.28507	-1.70411	-1.60149	-1.22212	0.47515	0.0815923	0.628412	0	-1.04484	-1.46494	-1.42686	-1.50924	0.395052
APOOL	Q6UXV4	139322	1	1	2	1	1	2	4.2	4.2	9.5	0	0	0	0.210885	0.593421	0.940876	-1.0258	-1.00938	0.481259	1.0365	0.818183	0.222531	0.243885	0.142762	2.32998	-0.0773866	-0.202767	3.08555	0	0.581727	-0.517972	0.692404	0.905542	0.935134
PSMD1	Q99460	5707	37	34	35	37	34	35	45.2	44	42.9	0	0	0	-0.635581	-0.266829	-0.445074	-0.871615	-0.91707	-1.16599	-0.291619	-0.276654	-0.531617	0.0366477	0.289534	-0.106476	-0.396423	-0.157793	-0.525445	0	-0.449162	-0.98489	-0.36663	0.0732352	-0.359887
SELENOM	Q8WWX9	140606	2	4	4	2	4	4	14.6	35.4	35.4	0	0	0	-0.302443	-0.0532521	-0.547923	-0.447073	-0.534755	-1.02384	-0.0817486	-0.208681	-0.569519	0.268219	0.568703	-0.133615	0.141167	0.217644	-0.344184	0	-0.301206	-0.668555	-0.28665	0.234436	0.0048759
MAZ	P56270	4150	3	3	3	1	1	1	16.3	16.3	16.8	0	0	0	0.120341	-0.570487	0.0939723	0.336712	-0.958418	-0.522877	1.06655	-0.463382	0.270441	1.18336	0.364849	0.787725	0.985922	-0.0517648	0.532304	0	-0.118724	-0.381528	0.291202	0.778645	0.488821
NDUFA10	O95299	4705	2	3	1	2	3	1	5.9	9	2.5	0	0	0	0.443003	-1.24176	-0.558787	-0.350643	-2.01321	-1.45643	0.247434	-0.866555	-0.347634	1.02569	0.0213495	0.48458	1.12958	-0.483294	-0.348323	0	-0.452514	-1.27343	-0.322252	0.510539	0.0993203
BCAM	A0A087WXM8	4059	10	8	8	10	8	8	20.4	16.2	17.9	0	0	0	-1.4606	-0.853512	-0.87871	-0.1255	-0.008752	-0.258312	0.862176	0.655467	0.792772	1.26686	1.32085	1.28641	0.822976	1.13924	1.04714	0	-1.06427	-0.130855	0.770139	1.29137	1.00312
SREK1	A0A087WY03		1	1	1	1	1	1	14	14	14	0	0		-7.93429	-6.31987		-5.80755	-5.03627		-5.23108	-4.07783		-4.75944	-4.03994		-5.32698	-4.38689		0	-7.12708	-5.42191	-4.65445	-4.39969	-4.85693
LAMA2	A0A087WYF1	3908	107	101	98	1	1	1	36.8	36	34.8	0	0	0	0.342802	1.70432	2.32612	1.55821	2.51139	3.34844	2.05746	2.90112	3.86466	2.43519	3.47928	4.19044	2.08649	3.14764	3.96705	0	1.45775	2.47268	2.94108	3.3683	3.06706
RNASET2	O00584	8635	7	8	10	1	1	1	33.6	34.8	44.7	0	0	0	-0.605355	0.224298	-0.397045	0.213115	0.595887	-0.0697144	0.887175	1.07443	0.512746	1.18927	1.61674	0.902854	0.82246	1.27121	0.657228	0	-0.259367	0.246429	0.824785	1.23629	0.916965
IDH3B	A0A087X2E5	3420	2	3	2	2	3	2	5.1	6.9	4.5	0	0	0	-0.933864	-0.177893	0.314622	-1.42709	-0.780991	-0.421727	-0.558103	0.176324	0.505363	0.0789319	1.34601	0.961512	-0.439653	0.70623	0.245808	0	-0.265712	-0.876603	0.0411945	0.795483	0.170795
ARFIP2	A0A087X1E4	23647	4	4	4	4	4	4	12.3	12.3	12.3	0	0	0	-0.287913	-0.957009	-0.174247	-1.06097	-1.58021	-1.09115	-0.239437	-0.281473	-0.082165	0.268137	0.0894802	0.461638	-0.105144	-0.807537	0.0852414	0	-0.473056	-1.24411	-0.201025	0.273085	-0.275813
SELENOF	O60613	9403	3	4	4	3	4	4	19.5	29.3	29.3	0	0	0	-0.34958	0.173995	0.136272	-0.112934	0.0288923	-0.196432	0.533515	0.744612	0.586391	0.927223	1.30433	1.05659	0.724991	1.08237	0.811223	0	-0.0131042	-0.0934913	0.621506	1.09605	0.872861
C1S	P09871	716	18	17	19	17	16	18	28.4	26.8	31.4	0	0	0	-0.872152	-0.700967	-0.796488	0.183294	-0.0587874	-0.300606	0.562103	0.271868	0.0752101	0.700306	0.647685	0.406466	0.73022	0.764142	0.535489	0	-0.789869	-0.0586999	0.30306	0.584819	0.676617
CD99	A0A096LP69	4267	2	2	2	1	1	1	12.5	12.5	12.5	0	0	0	-0.720797	-0.313848	-0.466697	-0.633485	-0.45427	-0.622121	-0.223725	-0.190314	-0.324828	-0.19289	0.291295	0.0986961	-0.701878	-0.257523	-0.485865	0	-0.500447	-0.569959	-0.246289	0.0657002	-0.481755
LAMA4	A0A0A0MTC7	3910	74	68	72	74	68	72	43.4	39.4	41.9	0	0	0	-0.541385	-0.35652	-0.154335	0.265272	0.0218251	0.0262201	0.687781	0.315904	0.544126	0.880987	0.81983	0.898928	0.807411	0.719207	0.743545	0	-0.350747	0.104439	0.515937	0.866581	0.756721
SEMA6A	A0A0A0MQU6	57556	3	3	6	3	3	5	2.6	2.5	5.6		0	0		-2.69711	-3.15601		-2.69596	-2.94722		-0.773025	-1.11451		0.674717	0.441736		1.61431	1.28937	0	-2.92656	-2.82159	-0.943767	0.558226	1.45184
MBNL1	C9JP00	4154	5	4	5	2	2	2	12.4	10.1	12.4	0	0	0	-0.922773	-0.627813	-0.281659	-1.06524	-1.2153	-1.24129	-0.0396532	-0.254586	-0.329785	0.27308	0.184424	0.180878	-0.472068	-0.766763	-0.390019	0	-0.610748	-1.17394	-0.208008	0.212794	-0.54295
SLIT3	O75094	6586	2	1	2	2	1	2	1.4	0.7	1.4	0	0	0	-0.140214	0.132202	-0.10534	0.0439666	-0.362366	-0.552635	0.917937	0.91624	0.0834001	1.28896	1.51706	0.734399	0.621861	0.454455	-0.101533	0	-0.0377841	-0.290345	0.639192	1.18014	0.324927
TAPBP	A0A0A0MSV9	6892	2	2	1	2	2	1	6.2	6.2	3.8		0	0		-0.275786	-0.05654		-0.413447	0.128031		0.406342	0.846855		1.30239	1.60225		0.860534	1.33596	0	-0.166163	-0.142708	0.626599	1.45232	1.09825
DDR1	A0A0A0MSX3	780	1	1	1	1	1	1	2.4	2.4	2.4	0	0	0	-0.811306	-1.7776	1.54355	0.530638	-0.957218	1.43756	1.23623	-0.269258	2.13301	2.3287	0.456902	3.20818	2.26673	0.381079	2.85017	0	-0.348453	0.336992	1.03332	1.99793	1.83266
LIPA	A0A0A0MT32	3988	4	4	4	4	4	4	12	12	12	0	0	0	-0.583137	-0.295108	-0.623863	-0.427159	-0.206411	-0.740927	0.461894	0.357539	-0.0959333	0.698437	0.725687	0.132809	0.397676	0.576992	0.0534668	0	-0.500703	-0.458165	0.241167	0.518978	0.342712
GPI	P06744	2821	20	21	20	14	15	15	35.6	35.6	39.4	0	0	0	-0.598799	0.0185891	-0.0614869	-0.757207	-0.660958	-0.760638	-0.233098	0.056247	-0.156756	0.126512	0.466107	0.269552	-0.524411	-0.182568	-0.224411	0	-0.213899	-0.726267	-0.111202	0.28739	-0.310463
ADAMTS13	Q76LX8	11093	1	1	1	1	1	1	3.6	3.6	3.6	0	0	0					-6.98716	-8.36456	-8.18315	-7.11419		-7.27649	-6.00373	-5.13918		-5.16951	-6.85166	0		-7.57374	-7.47842	-6.1398	-5.90846
CXCL14	O95715	9547	2	2	1	2	2	1	16.2	16.2	8.1	0		0	0.817031		-0.405454	1.65235		-0.152252	2.06334		0.218234	2.30564		0.506731	2.12817		0.24601	0	0.205788	0.75005	1.14079	1.40618	1.18709
CD276	A0A0C4DGH0	80381	5	4	2	5	4	2	16.8	14.2	7.7	0	0	0	-0.834771	-0.0272928	-1.42669	-0.546679	-0.641605	-1.28738	-0.364521	-0.20356	-0.660744	-0.139727	0.556474	-0.0869115	-0.447744	0.0477829	-0.293065	0	-0.762918	-0.825222	-0.409609	0.109945	-0.231009
DDOST	P39656	1650	5	3	3	5	3	3	11.2	5.9	6.6	0	0	0	-0.524762	0.376597	-0.0636898	-1.02138	-0.0732569	-0.715156	0.345885	0.845329	0.465955	0.578461	2.31405	1.14618	0.488634	1.64318	0.483314	0	-0.0706181	-0.603263	0.55239	1.34623	0.871708
KISS1	Q15726	3814	2	2	2	2	2	2	13.9	13.9	13.9		0	0		-1.8728	-2.95139		-0.13629	-1.86994		0.281875	-1.10599		0.814209	-0.761181		1.1395	0.0214435	0	-2.4121	-1.00311	-0.412057	0.0265139	0.580472
HLA-A	P30443	3105	13	12	10	3	3	3	45.3	45.3	38.5	0	0	0	-0.291269	0.304943	0.168154	0.0311328	0.134452	-0.0505737	0.618316	0.638478	0.461128	0.683155	1.03089	0.897644	0.324168	0.561633	0.461307	0	0.0606091	0.0383371	0.572641	0.870562	0.449036
EHMT2	A2ABF8	10919	1	2	2	1	2	2	0.8	1.4	2.9		0	0		-0.665622	-0.14534		-0.838944	-0.634943		-0.220924	0.265016		0.309675	0.633216		-0.0885733	0.231472	0	-0.405481	-0.736944	0.0220462	0.471446	0.0714492
LPCAT1	Q8NF37	79888	1	1	1	1	1	1	3.4	3.4	3.4		0	0		0.654628	-0.773657		-0.00513876	-1.28213		0.424914	-0.496843		1.79641	0.696283		1.28046	-0.572167	0	-0.0595144	-0.643634	-0.0359644	1.24635	0.354147
ARMC10	Q8N2F6	83787	3	3	3	3	3	3	20.3	20.3	20.3	0	0	0	-1.23414	-0.133174	-0.220123	-1.60501	-0.742059	-1.16422	-0.701009	0.146154	-0.324027	-0.550394	0.438887	0.11789	-0.956629	-0.0220654	-0.45094	0	-0.529144	-1.17043	-0.292961	0.0021276	-0.476545
PON2	J3QT77	5445	2	1	1	2	1	1	8.8	4.7	4.1	0		0	-0.928406		0.0969607	-1.38721		-0.857992	-0.394896		0.12845	-0.451855		0.631729	-0.427783		0.277897	0	-0.415723	-1.1226	-0.133223	0.0899367	-0.0749427
CNPY4	Q8N129	245812	2	2	2	2	2	2	20.3	20.3	20.3	0	0	0	-0.0851155	0.893639	0.512269	-0.228717	-0.739345	-0.0564617	0.0257262	0.00295107	0.707411	0.65814	0.454981	1.12692	0.748982	0.0536256	0.532391	0	0.440264	-0.341508	0.245363	0.746681	0.445
HLA-C	O19617	3107	10	9	9	1	0	0	37.4	33.1	33.1	0	0	0	-0.851937	-0.0992019	-0.507683	-0.492241	-0.0841185	-0.366509	0.100421	0.308043	0.0569575	0.124379	0.649922	0.358149	0.0783158	0.611455	0.307937	0	-0.486274	-0.31429	0.15514	0.377483	0.332569
TXNRD2	Q9NNW7	10587	5	7	7	4	6	6	11.9	16.4	17.8	0	0	0	-0.376742	-0.145081	0.406846	-0.498685	-0.326134	0.188607	0.216224	0.519413	0.759962	0.585414	0.933218	1.07673	0.104202	0.329445	0.581117	0	-0.0383258	-0.212071	0.498533	0.86512	0.338255
ADAMTS2	O95450	9509	3	2	4	3	2	4	3.5	2.3	6	0	0	0	-1.47341	-1.31579	-1.91926	-1.06791	-1.19948	-1.81768	-0.186553	-0.362052	-1.26422	0.146049	-0.16298	-0.635935	0.715478	0.480149	-0.190912	0	-1.56949	-1.36169	-0.604277	-0.217622	0.334905
CTSD	P07339	1509	15	13	13	15	13	13	43.6	36	42.4	0	0	0	-1.04773	-0.316935	-0.542258	-0.907872	-0.873576	-1.03732	-0.230994	-0.0733307	-0.471506	0.103053	0.490822	0.0242242	-0.191968	-0.02665	-0.228983	0	-0.635642	-0.93959	-0.25861	0.206033	-0.1492
ATP6AP2	O75787	10159	8	8	6	8	8	6	34.7	36.6	22.4	0	0	0	-1.11294	-0.679738	-0.659713	-0.847559	-0.923726	-1.07105	-0.134241	-0.0412153	-0.185259	0.199099	0.334026	0.177389	0.111309	0.260365	0.186263	0	-0.817464	-0.947445	-0.120238	0.236838	0.185979
DDX17	A0A1W2PQ51	10521	30	31	32	21	22	23	43.9	46	46.6	0	0	0	-0.539508	-0.0187365	0.178132	-0.876523	-0.808252	-0.724316	0.272659	0.400247	0.27604	0.617781	1.03693	0.762661	-0.046408	0.331884	0.142377	0	-0.126704	-0.80303	0.316315	0.80579	0.142618
GCSH	P23434	2653	2	2	2	2	2	2	30	30	30	0	0	0	-0.0307548	0.317507	0.0607848	-0.0237401	0.00118003	-0.263336	0.589118	0.431938	0.306717	0.885887	0.978523	0.710717	0.514485	0.64493	0.395847	0	0.115846	-0.0952988	0.442591	0.858376	0.51842
PPT1	P50897	5538	4	4	5	4	4	5	13.4	13.4	17.7	0	0	0	-0.330148	-0.309343	0.110592	-0.00967451	-0.592173	-0.356417	0.546179	0.106211	0.249578	0.808968	0.569515	0.71335	0.542248	0.196405	0.617276	0	-0.1763	-0.319421	0.300656	0.697278	0.451976
IDE	P14735	3416	23	26	26	23	26	26	23.6	27.7	27.4	0	0	0	-0.400565	-0.495931	-0.213254	-0.138923	-0.816786	-0.564288	0.480499	-0.0644123	0.0675899	0.669486	0.376526	0.563096	0.211369	-0.194197	0.0380844	0	-0.369917	-0.506665	0.161225	0.536369	0.0184189
C1R	P00736	715	26	22	24	25	21	23	42.3	35.3	37.4	0	0	0	-0.621778	-0.141602	-0.335861	0.272412	0.316374	0.110221	0.711333	0.683452	0.532782	1.01069	1.21878	1.05215	0.815242	1.01068	0.901669	0	-0.366414	0.233002	0.642523	1.09387	0.909197
THBS2	P35442	7058	32	29	28	28	25	24	34.7	31.6	30	0	0	0	-1.4771	-1.03516	-0.958763	-0.795709	-0.737651	-0.855567	-0.216342	-0.222617	-0.217186	0.131734	0.51467	0.333897	0.502331	0.741874	0.650996	0	-1.15701	-0.796309	-0.218715	0.326767	0.631734
ADAM9	Q13443	8754	8	9	7	8	9	7	13.5	15	12.3	0	0	0	-1.19706	-0.926082	-0.858617	-0.388052	-0.419174	-0.444011	0.130991	-0.0547312	0.00206827	0.251138	0.361313	0.41185	0.291906	0.500622	0.45919	0	-0.993919	-0.417079	0.0261094	0.341433	0.417239
SSC5D	A1L4H1	284297	20	24	22	20	24	22	18.8	22.5	21.7	0	0	0	-1.0179	-0.606018	-0.660853	-0.489805	-0.432028	-0.645123	-0.063247	-0.0715372	-0.143279	0.106994	0.399834	0.251248	0.561289	0.81157	0.61275	0	-0.761592	-0.522319	-0.0926878	0.252692	0.66187
PRNP	P04156	5621	5	5	5	5	5	5	20.1	20.1	20.1	0	0	0	-0.924014	-0.743516	-1.00469	-0.450132	-0.576634	-0.966501	0.00611017	-0.242314	-0.473753	0.0865756	0.20432	0.00104379	-0.0596104	0.211374	-0.0704878	0	-0.89074	-0.664422	-0.236653	0.097313	0.0270921
BST1	Q10588	683	2	4	4	2	4	4	6.3	12.3	12.3	0	0	0	-1.23707	-0.541625	-0.858464	-0.0711067	0.282018	-0.0522174	0.978431	0.933706	0.589812	1.10015	1.59703	1.19067	1.17569	1.53815	1.25264	0	-0.879055	0.0528981	0.833983	1.29595	1.32216
IGFBP3	P17936	3486	17	17	17	17	17	17	61.1	60	58.5	0	0	0	-1.43335	-1.09697	-0.737543	0.228416	0.0134043	0.294154	1.38731	1.1017	1.42654	2.36833	2.07232	2.40325	3.39618	3.07572	3.46477	0	-1.08929	0.178658	1.30518	2.2813	3.31222
MANF	A8K878	7873	8	10	12	8	10	12	45.4	47	46.5	0	0	0	-0.57329	-0.206277	0.0226376	-0.34007	-0.718529	-0.435124	0.234026	0.0464825	0.0329459	0.587905	0.660957	0.621545	0.20452	0.185394	0.293937	0	-0.25231	-0.497908	0.104485	0.623469	0.22795
MATR3	A0A0R4J2E8	9782	18	20	19	18	20	19	24.4	24.1	22.7	0	0	0	-0.364446	-0.166024	0.182115	-0.59373	-0.719617	-0.810544	0.328957	0.0200153	0.135901	0.629097	0.794234	0.715328	0.150059	0.409764	0.256852	0	-0.116119	-0.707964	0.161625	0.712886	0.272225
NRDC	B1AKJ5	4898	26	26	28	26	26	28	21.2	19.8	21	0	0	0	-0.888321	-0.40502	-0.190874	-1.01729	-0.830122	-0.793341	-0.468959	-0.265938	-0.176812	-0.0641212	0.266204	0.3453	-0.513788	-0.0278878	0.0261529	0	-0.494738	-0.880251	-0.303903	0.182461	-0.171841
POSTN	B1ALD9	10631	36	36	36	3	3	3	53.1	52.8	51.2	0	0	0	-1.79613	-0.605891	-0.73575	-1.30952	-0.552606	-0.797809	-0.0768169	0.726806	0.455331	0.6882	1.62898	1.28007	1.05147	2.03695	1.67615	0	-1.04592	-0.886645	0.36844	1.19909	1.58819
CD55	B1AP13	1604	7	7	8	7	7	8	23.3	21.8	25.2	0	0	0	-0.942647	-0.552629	-0.700334	-0.458525	-0.662891	-0.735249	0.120947	0.0797504	-0.00503739	0.369966	0.654101	0.464086	-0.073697	0.0900853	-0.207682	0	-0.73187	-0.618889	0.06522	0.496051	-0.0637646
CS	O75390	1431	12	12	11	7	6	5	26.5	25.8	24.3	0	0	0	-0.828173	-0.30186	-0.701418	-0.941005	-0.823451	-1.37016	-0.362014	0.0407873	-0.47977	0.258036	0.247973	-0.445251	-0.406742	0.181041	-0.641886	0	-0.610484	-1.04487	-0.266999	0.0202529	-0.289196
FXR1	P51114	8087	15	18	14	13	16	12	28.5	31.4	24.8	0	0	0	-0.431286	-0.385952	-0.125157	-0.851608	-1.21294	-1.0821	-0.104515	-0.244201	-0.265357	0.280456	0.554552	0.332831	-0.155051	0.030316	-0.247111	0	-0.314132	-1.04888	-0.204691	0.38928	-0.123949
TCN2	P20062	6948	7	7	7	7	7	7	16.4	16.4	18.2	0	0	0	0.228384	0.754568	1.59961	0.39312	0.513938	1.18183	0.288619	0.608162	1.10386	0.37105	0.703286	1.30372	0.199831	0.708661	1.23156	0	0.860854	0.696297	0.666879	0.792684	0.71335
IL6	P05231	3569	12	13	10	12	13	10	65.1	68.8	60.8	0	0	0	1.05077	1.2582	0.385194	1.03053	1.18596	0.269577	2.98482	3.01585	2.03095	3.99947	4.19503	3.06919	3.18239	3.38281	2.60923	0	0.898056	0.828689	2.67721	3.75456	3.05814
AGPS	O00116	8540	2	2	1	2	2	1	15.3	15.3	9	0	0		-0.219018	0.59926	0.14011	-3.65906	-1.8103	-2.25726	0.31437	1.17951	0.449508	0.439998	1.35134	0.788442	-0.543798	-0.304621	-0.633264	0	0.173451	-2.57554	0.647797	0.859926	-0.493895
GLS	B8ZZA8		1	3	2	1	2	2	10.7	24.9	20.1		0	0		-1.26378	0.2851		-2.09495	-0.37581		-0.885158	0.839647		-0.07984	1.14977		-0.935275	0.443271	0	-0.489339	-1.23538	-0.0227554	0.534967	-0.246002
CXCL8	P10145	3576	3	3	3	3	3	3	33.7	33.7	33.7	0	0	0	1.86266	1.05394	2.08787	2.44258	1.04186	2.32155	4.61281	3.1619	4.3655	5.63458	4.44714	5.60107	5.08171	3.74637	5.30278	0	1.66816	1.93533	4.04674	5.2276	4.71028
FXN	Q16595	2395	3	2	2	3	2	2	27.8	17.6	17.6	0	0	0	0.174894	0.73104	0.717911	-0.11033	0.207369	0.0654954	0.485167	0.703928	0.588804	0.707518	1.18203	0.974264	0.212367	0.799721	0.650229	0	0.541282	0.054178	0.592633	0.954602	0.554106
APOD	P05090	347	6	5	6	6	5	6	26.5	23.3	26.5	0	0	0	-0.808051	-0.537332	-0.428706	0.407694	0.316476	0.25121	1.09255	0.981912	0.935001	1.06644	1.1159	1.1238	1.00484	0.953593	1.04507	0	-0.591363	0.325127	1.00315	1.10205	1.00117
PCCB	P05166	5096	4	4	2	4	4	2	15.1	15.1	7.2	0	0	0	-0.488005	-0.752536	-3.85257	-0.904607	-1.63956	-1.60167	0.0840974	-0.0291249	-0.449812	0.571046	1.25704	0.171565	-0.0513293	-0.246759	-0.315727	0	-1.6977	-1.38194	-0.131613	0.666551	-0.204605
NRCAM	C9JYY6	4897	2	2	2	2	2	2	2.6	2.6	2.2		0	0		-1.20878	0.35881		-1.64352	0.348195		-1.11272	1.31515		-0.156067	1.77998		-0.564842	1.85664	0	-0.424983	-0.647661	0.101216	0.811957	0.6459
ALB	P02768	213	49	49	51	44	44	45	72.4	73.4	74.4	0	0	0	-3.44207	-2.31714	-2.27738	-3.06506	-2.32603	-2.41695	-2.77434	-2.09794	-2.27286	-4.72579	-4.92288	-4.0855	3.7262	4.45928	4.43984	0	-2.67886	-2.60268	-2.38171	-4.57805	4.20844
AREG	P15514	374	2	2	1	2	2	1	8	8	4	0	0	0	-1.28524	-0.812098	0.152628	-0.738455	-0.270507	0.693235	-0.455719	0.34563	1.11846	-0.656524	0.395118	1.56555	-0.928972	0.0886632	1.22464	0	-0.648235	-0.105243	0.336122	0.434713	0.128111
COL12A1	Q99715	1303	89	90	91	74	77	77	32.8	35.1	35.6	0	0	0	-1.7006	-1.23959	-1.1318	-0.989506	-0.865631	-0.999941	-0.604292	-0.504689	-0.564261	0.0441012	0.221526	0.0345193	0.400793	0.692607	0.318863	0	-1.35733	-0.951693	-0.557748	0.100049	0.470754
ERLIN2	O94905	11160	7	11	8	5	9	6	23.1	34	26.6	0	0	0	-0.632052	-0.324281	-0.278365	-1.0682	-1.16877	-1.19228	-0.345957	-0.0895616	-0.275316	0.0715601	0.664501	0.258774	-0.328852	0.0951951	-0.229536	0	-0.411566	-1.14308	-0.236945	0.331612	-0.154398
SLC39A14	Q15043	23516	2	3	2	2	3	2	20.6	29	16.1	0	0	0	-0.610857	0.0950985	0.0559988	-0.246122	-0.536361	-0.35447	0.235717	0.0940027	0.268734	0.434078	0.861578	0.839145	0.135182	0.486502	0.211167	0	-0.153253	-0.378984	0.199484	0.7116	0.277617
MMP16	P51512	4325	2	2	2	2	2	2	8.9	8.9	8.9	0	0	0	-1.43511	-0.25226	-0.490516	-1.06689	-0.431527	-0.668324	-0.380606	0.288491	0.138906	-0.145042	0.650053	0.502409	-0.545337	0.212117	0.117115	0	-0.725961	-0.722247	0.0155969	0.335807	-0.0720348
NPC2	G3V3E8	10577	6	7	7	6	7	7	50	50	50	0	0	0	-0.937953	-0.607308	-0.705573	-0.498446	-0.648017	-0.784823	-0.080493	-0.292053	-0.403316	0.108024	0.272942	0.0940191	0.219561	0.339445	0.226669	0	-0.750278	-0.643762	-0.258621	0.158328	0.261892
COL6A3	E7ENL6		118	114	115	0	0	0	47.6	46.7	48.5	0	0	0	0.09855	0.67536	0.633252	0.925262	1.1581	0.83446	1.58817	1.74602	1.51663	1.82762	2.23446	1.78455	2.08194	2.56546	1.97015	0	0.469054	0.972606	1.61694	1.94888	2.20585
PLOD2	O00469	5352	15	14	13	15	14	13	24.2	22.8	21.8	0	0	0	-1.01613	-0.701763	-0.889635	-0.966984	-1.02677	-1.30566	-0.387202	-0.313519	-0.653282	0.29722	0.458375	0.0328498	0.572919	0.616854	0.30115	0	-0.869176	-1.09981	-0.451334	0.262815	0.496974
NRG1	Q02297	3084	4	3	3	4	3	3	7.7	6.2	6.2	0	0	0	-0.0663647	0.183184	-0.468485	0.0587318	0.0531623	-0.608418	0.815686	0.576211	0.0558998	1.62573	1.77701	0.809895	1.33944	1.4976	0.862455	0	-0.117222	-0.165508	0.482599	1.40421	1.23317
SERPING1	P05155	710	16	14	14	14	13	12	26.9	23.9	23.8	0	0	0	-2.42698	-1.0947	-1.217	-1.34	-0.331411	-0.694467	-1.00006	0.0082117	-0.0338848	-0.559874	0.241401	0.139581	-0.654101	0.826424	0.47398	0	-1.57956	-0.788625	-0.341912	-0.0596307	0.215434
HTATIP2	Q9BUP3	10553	1	1	2	1	1	2	3.6	5.1	8.7		0	0		-1.20382	0.35346		-1.97374	-0.545407		-0.535426	0.25639		0.181568	0.753757		-0.585634	0.512362	0	-0.425178	-1.25958	-0.139518	0.467663	-0.0366362
THY1	P04216	7070	4	4	4	4	4	4	26.3	26.3	26.3	0	0	0	-1.32461	-0.651465	-0.469234	-0.847165	-1.09994	-0.75325	-0.457059	-0.615515	-0.213937	-0.278532	0.226179	0.427869	-0.479413	-0.234926	-0.213649	0	-0.815102	-0.900117	-0.428837	0.125172	-0.309329
ADM	P35318	133	5	6	6	5	6	6	39.9	45.7	45.7	0	0	0	-0.851701	-0.322455	-0.679479	-0.317382	-0.146784	-0.526741	0.332971	0.398096	-0.0541534	0.742454	0.933512	0.424028	0.749203	0.748222	0.494386	0	-0.617878	-0.330302	0.225638	0.699998	0.663937
MDK	P21741	4192	7	7	5	7	7	5	52.7	52.7	42	0	0	0	0.0975149	0.501063	0.272939	0.598058	0.676219	0.601581	1.11163	1.2927	1.1779	1.38461	1.77771	1.71478	0.970037	1.55694	1.39986	0	0.290506	0.625286	1.19407	1.6257	1.30895
PAMR1	E9PQ70		16	13	14	2	1	2	26.2	21.5	22.8	0	0	0	-0.600407	0.0548618	-2.0303	-0.112507	0.283385	-1.74988	0.531399	0.865701	-1.0094	0.699688	1.14693	-0.869802	0.52613	0.955059	-0.982121	0	-0.858616	-0.526334	0.129233	0.325605	0.166356
SPARC	F5GY03		14	14	13	1	1	1	69.8	69.8	69.8		0	0		0.155986	0.694261		0.511653	1.11084		0.80129	1.42066		1.11452	2.16542		1.43967	2.21536	0	0.425123	0.811245	1.11098	1.63997	1.82752
MEIS1	O00470	4211	2	3	1	2	3	1	10.8	17.8	5.1		0	0		-0.100432	-0.430515		-0.391199	-0.706157		0.485805	-0.302003		0.944106	0.163787		-0.11045	-0.446158	0	-0.265473	-0.548678	0.0919008	0.553946	-0.278304
TDGF1	F5H1T8	6997	3	2	1	3	2	1	18.6	14.5	8.7	0	0	0	-5.85172	-1.68823	-0.47687	-4.05699	-1.22431	0.421434	-2.63804	0.000904599	2.07819	-1.53568	1.19682	3.30231	-0.992919	1.76764	3.95478	0	-2.67227	-1.61996	-0.186313	0.987816	1.5765
GRSF1	Q12849	2926	8	7	7	8	7	7	21.8	16.5	16.5	0	0	0	-0.347948	0.0793859	-0.10895	-0.803046	-0.752301	-0.987099	0.0232765	0.0611836	-0.180771	0.232427	0.498055	0.107702	-0.471604	0.0938794	-0.447856	0	-0.125837	-0.847482	-0.0321038	0.279395	-0.275194
LTBR	P36941	4055	1	2	0	1	2	0	4.1	7.8	0	0	0		-0.852515	0.0452585		-0.932888	-0.342457		-0.289783	0.178815		0.11569	0.576517		-0.195867	0.679857		0	-0.403628	-0.637673	-0.0554842	0.346104	0.241995
TNFRSF1A	P19438	7132	1	0	2	1	0	2	7.1	0	10.2	0		0	-3.05192		-1.07299	-1.88449		-0.728025	-2.58965		-0.137945			0.236524	-2.23292		0.251586	0	-2.06246	-1.30626	-1.3638	1.21535	-0.990669
DKK3	F6SYF8	27122	8	8	7	8	8	7	30.8	30.8	24.5	0	0	0	-1.91209	-1.4982	-1.43541	-1.17074	-1.05875	-0.981135	-0.421129	-0.5805	-0.38959	-0.195598	-0.154405	0.0650248	0.0550462	0.258025	0.384921	0	-1.61523	-1.07021	-0.46374	-0.0949925	0.232664
SMARCA2	F6VDE0	6595	5	7	4	2	3	2	3.6	4.5	2.9	0	0		-1.49352	0.403787		-1.13473	0.183259		-0.415489	0.774916		-0.107471	1.20556		-0.615416	0.890454		0	-0.544867	-0.475737	0.179714	0.549043	0.137519
FKBP11	Q9NYL4	51303	1	1	1	1	1	1	15.9	15.9	15.9	0		0	0.176563		0.040448	0.336889		-1.22195	0.729873		0.556706	1.37433		1.14813	0.691139		0.387026	0	0.108505	-0.442528	0.643289	1.26123	0.539082
CNPY2	F8W031	10330	6	7	9	0	0	0	24.7	25.5	34.2	0	0	0	-0.341545	-0.0631778	-0.169342	-0.279877	-0.442185	-0.592879	-0.00343017	0.035145	-0.221859	0.458986	0.556652	0.31088	0.0235438	0.311084	0.11414	0	-0.191355	-0.438314	-0.0633812	0.442172	0.149589
PTK7	F8WDG7		7	8	7	1	1	1	51.6	67.5	51.6		0	0		-1.33979	-0.608915		-0.795767	-0.2752		-0.431304	0.112679		0.323512	0.873143		-0.238781	-0.0659573	0	-0.974352	-0.535483	-0.159312	0.598327	-0.152369
NDUFV1	P49821	4723	6	5	5	6	5	5	16.8	14.4	11.6	0	0	0	-1.1777	-0.171763	0.543952	-1.1537	-0.844675	-0.309694	-0.344203	0.435338	0.779063	0.366169	1.24621	1.28823	-0.13986	0.529925	0.815798	0	-0.268503	-0.769356	0.290066	0.96687	0.401954
C14orf93	Q9H972	60686	1	1	1	1	1	1	9.4	9.4	9.4	0	0	0	0.532986	0.861294	0.870917	0.908594	0.819793	0.691367	1.38229	1.30057	1.42367	1.91779	1.93374	1.93318	1.63968	1.76971	1.77313	0	0.755066	0.806584	1.36884	1.92824	1.7275
LTBP2	Q14767	4053	34	31	31	33	30	31	24.8	22.5	21.8	0	0	0	-1.23222	-1.04795	-1.12238	-0.840311	-1.06656	-1.15149	-0.0957483	-0.442064	-0.594021	0.366606	0.222881	0.19114	1.72781	1.44776	1.51332	0	-1.13418	-1.01945	-0.377278	0.260209	1.56297
PGF	G3XA84	5228	2	2	1	2	2	1	13	13	4.1	0	0	0	0.943146	-0.497964	0.98762	1.22861	-0.482939	0.478501	1.75691	0.164238	1.47958	2.32019	1.10061	1.89847	1.80087	0.578112	1.56665	0	0.477601	0.408056	1.13358	1.77309	1.31521
LAMB1	G3XAI2	3912	65	69	66	43	48	46	40.2	41.9	40.3	0	0	0	-0.581384	-0.112049	-0.160447	0.268825	0.382404	0.104804	0.727143	0.742383	0.625355	0.9619	1.21003	0.991309	0.780077	1.03131	0.777916	0	-0.284627	0.252011	0.698293	1.05441	0.8631
MRPS22	G5E9W7	56945	3	4	4	3	4	4	10.7	13.2	13.5	0	0	0	-0.484326	-0.259202	-0.392553	-1.06478	-1.40412	-1.24177	-0.056605	-0.0109445	-0.231193	0.437764	0.824753	0.325278	0.235705	0.0143944	-0.205282	0	-0.378693	-1.23689	-0.0995809	0.529265	0.0149392
RBM33	Q96EV2	155435	3	3	2	3	2	2	4.4	4.1	3.4	0	0		-1.24207	-0.225124		-1.03896	-0.903684		-0.473573	-0.016641		-0.193033	0.463684		-0.13174	0.368855		0	-0.733595	-0.971324	-0.245107	0.135325	0.118557
SERPINB4	P48594	6318	5	5	5	2	2	2	11.9	11.1	12.1	0	0	0	-1.36787	0.199076	-0.158949	-0.183024	0.36857	0.129167	1.17609	1.5222	1.57327	2.1255	2.68819	2.89027	1.71851	2.31018	2.61753	0	-0.442581	0.104904	1.42385	2.56798	2.21541
MAN2B2	Q9Y2E5	23324	7	5	7	7	5	7	8.3	5.4	8.5	0	0	0	-0.676544		-0.575168	-0.486237	-0.710974	-0.715725	0.246893	-1.0198	-0.0693464	0.412944	-0.382471	0.194602	0.169025	0.687268	0.155895	0	1.52191	-0.637645	-0.280753	0.0750251	0.337396
LOXL2	H0YAR1	4017	6	7	7	1	1	1	34.8	38.2	38.2	0	0	0	-1.77028	-1.93366	-1.92628	-1.39638	-1.95578	-1.95476	-0.692055	-1.35901	-1.35577	-0.45769	-0.622359	-0.9655	-0.0800396	-0.53499	-0.679878	0	-1.87674	-1.76897	-1.13561	-0.68185	-0.431636
BMP4	P12644	652	1	1	2	1	1	2	4.1	4.1	8.5	0		0	-1.37506		-0.726717	0.0704556		0.103238	0.716117		0.715444	0.933264		1.43778	0.834245		0.768828	0	-1.05089	0.0868467	0.715781	1.18552	0.801537
LDLR	P01130	3949	20	17	16	19	16	16	22	17.2	16.8	0	0	0	-0.612616	-0.207775	-0.101047	-0.4603	-0.264191	-0.364677	-0.0354976	0.0417783	0.115028	0.158963	0.474211	0.424154	-0.201692	0.146936	0.214659	0	-0.307146	-0.363056	0.0404363	0.352443	0.0533011
RPS27L	Q71UM5	51065	3	3	3	1	1	1	32	32	32	0	0	0	0.23232	-0.158542	-0.192876	-0.605989	-1.16443	-1.37325	0.32335	0.212185	-0.146042	0.996549	0.757769	0.390716	-0.406243	-0.102696	-0.656171	0	-0.0396993	-1.04789	0.129831	0.715011	-0.38837
ITGB3	P05106	3690	2	2	2	2	2	2	2.4	2.4	2.4	0	0		-1.38872	0.158899		-0.862145	-0.587466		-0.251218	-0.26727		-0.178052	0.662435		0.263969	0.552373		0	-0.61491	-0.724805	-0.259244	0.242191	0.408171
HEXA	H3BP20	3073	14	12	14	14	12	14	25.9	21.2	25.9	0	0	0	-0.448774	-0.195618	-0.146377	-0.209085	-0.415555	-0.432268	0.285931	0.0765241	0.0542218	0.509634	0.604494	0.450598	0.335585	0.325209	0.263622	0	-0.263589	-0.352303	0.138892	0.521576	0.308138
MPI	H3BPB8	4351	2	2	4	2	2	4	8.4	6.7	13.2	0	0	0	-0.28806	-0.322693	-0.82372	-1.34346	-0.541737	-1.19376	-0.301361	-0.101103	-0.776376	0.18376	0.508387	-0.187103	-2.60938	0.295741	-0.69092	0	-0.478158	-1.02632	-0.392947	0.168348	-1.00152
ARMC5	J3KQ26	79798	1	1	1	1	1	1	1.3	1.3	1.3	0	0	0	1.94067	2.08305	1.82315	3.42252	3.33086	2.90057	4.43051	4.25235	3.87097	4.46481	4.83645	4.48457	4.929	4.94514	4.42618	0	1.94896	3.21798	4.18461	4.59528	4.76677
HAPLN3	H3BTH8	145864	2	2	2	1	1	1	5	5	5	0	0	0	-2.45344	-1.37672	-1.85134	-1.30823	-1.08196	-1.37266	-0.612983	-0.310789	-0.682919	-0.257415	0.562866	-0.0735947	0.286839	0.988204	0.49108	0	-1.89383	-1.25429	-0.535564	0.0772853	0.588708
DHX30	H7BXY3	22907	2	2	2	2	2	2	1.6	1.6	1.6	0	0	0	-1.22519	-0.966405	1.66523	-1.66456	-1.94687	1.02072	-0.711854	-0.771926	1.43798	-0.38726	-0.576003	1.99977	-1.27036	-0.339237	1.45586	0	-0.175453	-0.86357	-0.0152682	0.345502	-0.0512479
PDIA3	H7BZJ3		8	8	7	1	1	1	56.9	56.9	54.5	0	0	0	-0.543809	-1.25602	0.3507	-0.369409	-0.834352	0.123969	0.555223	0.0768691	0.688605	0.7013	-1.68204	1.20822	0.407892	0.0866469	0.777884	0	-0.483044	-0.35993	0.440232	0.0758256	0.424141
LIPG	Q9Y5X9	9388	1	1	1	1	1	1	4.4	4.4	4.4	0	0		-2.64275	1.29224		-2.93818	0.285579		-1.07192	1.48053		-1.11673	1.09478		-1.81622	1.44551		0	-0.675257	-1.3263	0.204305	-0.0109772	-0.185353
ZNF207	O43670	7756	4	4	4	4	4	4	9.9	9.9	9.9	0	0	0	-0.424475	-0.0980084	0.33686	-0.411556	-0.548642	-0.352696	0.190947	0.0207964	0.208567	0.431095	0.682594	0.604664	-0.0127985	0.234344	0.255114	0	-0.0618744	-0.437631	0.140104	0.572784	0.158887
LONP1	P36776	9361	10	9	9	10	9	9	12.8	9.7	12	0	0	0	-1.27799	-1.27212	-0.962698	-0.953504	-1.78263	-1.6907	-0.128599	-0.763109	-0.541631	0.178745	0.0816312	-0.0525101	-0.101174	-0.373873	-0.865421	0	-1.17094	-1.47561	-0.477779	0.0692887	-0.446823
PRKCSH	K7ELL7	5589	22	19	18	22	19	18	42.4	40.9	36.3	0	0	0	0.069982	0.440453	0.435208	0.0260783	0.0319836	0.135587	0.485891	0.409625	0.518136	0.761916	0.974702	0.889543	0.499719	0.653755	0.617289	0	0.315215	0.0645495	0.471217	0.875387	0.590254
APOC1	P02654	341	2	3	3	2	3	3	23.4	26	26	0	0	0	-0.814148	-0.361227	-1.77644	0.0269721	-0.458375	-1.84781	0.507003	0.456879	-1.13872	0.855147	0.835632	-0.692863	0.487052	0.308862	-0.958065	0	-0.983937	-0.759738	-0.0582803	0.332639	-0.0540503
MFAP4	P55083	4239	2	2	2	2	2	2	8.9	8.9	8.9	0	0	0	0.0162337	0.134895	-0.438267	0.752915	0.373099	-0.276118	0.980171	0.444417	-0.15352	1.58397	1.24586	0.695133	2.99544	2.80143	1.74397	0	-0.0957129	0.283299	0.423689	1.17499	2.51361
DNASE2	O00115	1777	4	5	5	4	5	5	11.1	13.9	13.9	0	0	0	-1.06227	-0.432285	-0.406308	-1.08136	-0.807656	-0.684995	-0.425209	-0.28985	-0.256099	-0.00252507	0.331288	0.263439	-0.283389	0.200983	0.116793	0	-0.633622	-0.858004	-0.323719	0.197401	0.0114624
TNFRSF11B	O00300	4982	18	17	18	18	17	18	39.7	37.4	41.6	0	0	0	-0.960826	-0.853665	-0.60685	-0.354621	-0.546225	-0.426296	0.547126	0.425709	0.298906	0.686909	0.47767	0.409163	0.368546	0.264413	0.223452	0	-0.807114	-0.442381	0.423914	0.524581	0.28547
MANBA	O00462	4126	15	10	10	14	9	9	18.7	12.5	12.2	0	0	0	-1.17567	-0.227713	-0.332144	-0.552087	0.0288089	-0.048126	0.0776706	0.492307	0.548084	0.305058	1.08873	0.99198	0.253928	1.02537	1.05906	0	-0.578508	-0.190468	0.372687	0.795256	0.779452
AGRN	O00468	375790	55	55	56	55	55	56	36.6	37.1	36	0	0	0	-0.542969	-0.054478	0.140231	0.288593	0.354555	0.381259	1.10103	1.13036	1.05221	1.37115	1.64427	1.59245	0.783586	1.02365	1.07402	0	-0.152405	0.341469	1.09453	1.53595	0.960421
CCN1	O00622	3491	18	18	18	18	18	18	47.2	45.4	47.5	0	0	0	-0.787747	-0.337841	0.0743475	-1.30622	-1.00635	-0.820861	-0.444529	-0.246265	-0.02049	0.0544927	0.332174	0.551878	-0.335186	0.00972631	0.367376	0	-0.350414	-1.04448	-0.237095	0.312849	0.0139723
MAN2B1	O00754	4125	13	14	16	13	14	16	15.1	16.1	17	0	0	0	-1.24654	-1.38552	-1.35905	-0.858055	-1.37953	-1.46266	-0.12397	-0.687175	-0.704736	0.375828	0.0309975	-0.136637	0.152143	-0.178099	-0.343031	0	-1.33037	-1.23341	-0.505294	0.0900626	-0.122996
ISLR	O14498	3671	7	6	7	7	6	7	22	16.1	22	0	0	0	-1.00365	-0.896114	-0.244559	0.270773	0.0318209	0.304592	0.850197	0.445252	0.922076	0.941483	0.649457	1.03166	0.943317	0.677774	1.15783	0	-0.714775	0.202395	0.739175	0.874199	0.926307
ADAM10	O14672	102	17	21	19	17	21	19	25.4	31.4	29.3	0	0	0	-0.41292	-0.290607	0.0740678	-0.0881236	-0.261914	-0.0838993	0.436628	0.201008	0.451954	0.586055	0.504618	0.761635	0.407041	0.308264	0.650374	0	-0.20982	-0.144646	0.363197	0.617436	0.455227
EREG	O14944	2069	2	1	2	2	1	2	11.8	6.5	11.8	0	0	0	-0.568887	-1.54037	-1.54129	-0.3035	-2.17176	-1.45922	0.680576	-1.19309	-0.638368	1.03441	-0.396817	-0.0908406	0.58932	-0.743784	-0.217702	0	-1.21685	-1.31149	-0.383629	0.182249	-0.124055
GAK	O14976	2580	4	5	2	4	5	2	3.6	4.3	2.1	0	0	0	-1.48786	-0.64034	-0.198665	-1.53248	-1.10329	-0.794634	-0.861186	-0.278248	-0.106855	-0.363512	0.28742	0.518893	-0.74524	-0.144645	0.0199259	0	-0.775621	-1.14347	-0.41543	0.1476	-0.289986
LAMA5	O15230	3911	63	65	59	63	65	59	20	21.1	19.3	0	0	0	-0.859564	-0.462428	-0.45836	0.202946	0.247983	-0.022581	0.936128	0.963106	0.778685	1.43415	1.76022	1.396	1.16608	1.53721	1.17507	0	-0.593451	0.142783	0.892639	1.53012	1.29279
MATN3	O15232	4148	6	7	11	6	7	11	16.9	18.7	27.8	0	0	0	-1.37302	-1.03941	-1.7779	-0.659207	-0.544283	-1.43975	0.497532	0.656224	-0.27362	1.62233	1.76386	0.649364	1.63209	1.80165	0.970901	0	-1.39678	-0.881079	0.293378	1.34518	1.46821
SPINT1	O43278	6692	7	8	10	7	8	10	13.2	14.6	19.1	0	0	0	-0.78649	-0.411594	-0.912352	-0.166853	-0.176917	-0.868309	0.748719	0.540825	-0.038285	1.2163	1.55385	0.776993	1.21444	1.50641	0.750701	0	-0.703479	-0.404026	0.417087	1.18238	1.15718
PI15	O43692	51050	1	1	1	1	1	1	3.9	3.9	3.9	0	0	0	2.17762	-0.178357	2.02948	4.09223	1.38362	3.89947	4.58789	1.81305	4.34303	5.13127	2.41727	4.84991	5.50283	2.91985	5.27536	0	1.34292	3.12511	3.58132	4.13281	4.56601
CALU	O43852	813	20	20	21	20	20	21	60.3	63.2	63.2	0	0	0	-0.151244	-0.0281794	0.00337774	-0.0849566	-0.129621	-0.414668	0.429038	0.265636	0.0820896	0.878353	0.857144	0.713919	0.927661	1.01528	0.859271	0	-0.0586818	-0.209748	0.258921	0.816472	0.934069
VEGFD	O43915	2277	12	12	12	12	12	12	30.2	33.6	33.6	0	0	0	-1.34876	1.11213	0.774122	-0.935315	1.18078	0.80641	0.104188	2.12978	1.64733	0.550223	2.73248	2.34071	0.133102	2.27961	1.91773	0	0.179166	0.350625	1.29377	1.87447	1.44348
KDM1A	O60341	23028	12	10	8	12	10	8	20.8	17.1	10.8	0	0	0	-0.639917	-0.286489	0.0505008	-0.676783	-0.746357	-0.634676	-0.0385713	0.0105075	0.168877	0.435672	0.614276	0.908306	-0.179441	0.1423	0.201995	0	-0.291968	-0.685939	0.0469379	0.652752	0.0549514
TPST1	O60507	8460	2	2	0	2	2	0	5.4	5.4	0	0	0		-0.527347	-0.783138		-0.241089	-0.484701		0.504117	-0.0422903		1.42142	0.0443693		1.18476	0.344668		0	-0.655243	-0.362895	0.230913	0.732895	0.764713
B4GALT4	O60513	8702	5	8	5	5	8	5	16.6	25	16.9	0	0	0	-1.27515	-0.866081	-1.21385	-1.10511	-1.01501	-1.62722	-0.221487	0.243558	-0.522655	0.340535	0.773872	0.175109	-0.0898861	0.180947	-0.261951	0	-1.11836	-1.24911	-0.166861	0.429839	-0.0569636
GREM1	O60565	26585	9	9	9	9	9	9	63.6	63.6	63.6	0	0	0	-1.26706	-0.909606	-0.931994	-1.16924	-1.27698	-1.38092	-0.588768	-0.792473	-0.908123	-0.1107	0.0945191	-0.113412	0.385967	0.516326	0.292352	0	-1.03622	-1.27571	-0.763122	-0.0431977	0.398215
PLOD3	O60568	8985	30	28	27	30	28	27	43.4	38.9	36.4	0	0	0	-1.05414	-0.432349	-0.443788	-0.66093	-0.487632	-0.568495	-0.201239	0.0950537	-0.0281894	0.0109808	0.479339	0.282986	-0.3884	0.0906768	-0.133833	0	-0.643424	-0.572352	-0.0447915	0.257769	-0.143852
TSPAN3	O60637	10099	1	1	1	1	1	1	2.8	2.8	2.8	0	0		-0.456453	-0.166877		-0.444524	-0.613122		0.116548	-0.0613622		0.217941	0.617493		-0.0891944	0.248772		0	-0.311665	-0.528823	0.0275931	0.417717	0.0797886
SRPX2	O60687	27286	15	9	12	15	9	12	38.3	21.5	28.6	0	0	0	-0.724636	-0.756986	-0.147472	-0.017477	-0.244674	0.106282	0.648704	0.141614	0.554263	1.17588	0.94329	1.24195	1.72968	1.47579	1.80106	0	-0.543031	-0.0519564	0.448194	1.12037	1.66884
ADAMTS4	O75173	9507	3	3	4	3	3	4	6.8	14.5	14.5	0	0	0	-1.68762	0.146747	-2.0052	-1.33781	0.194412	-2.06834	-0.469276	1.11667	-1.29146	-0.0881469	1.84116	-0.633194	-0.191756	2.07736	-0.595918	0	-1.18202	-1.07058	-0.214688	0.373273	0.429895
CILP	O75339	8483	15	16	14	15	16	14	12.2	13.8	11.5	0	0	0	-0.140326	-0.407887	0.384042	-0.305439	-1.09909	-0.246986	0.137979	-0.531424	0.0688916	0.702825	0.283146	0.873281	1.05129	0.383242	1.0796	0	-0.0547238	-0.550504	-0.108185	0.619751	0.838045
MTX2	O75431	10651	2	2	2	2	2	2	8	8	8		0	0		-0.496607	0.695985		-1.23749	-0.48523		0.0651175	0.665779		0.622561	1.15837		0.241552	0.442126	0	0.099689	-0.86136	0.365448	0.890468	0.341839
SAP30	O75446	8819	1	2	1	1	2	1	3.2	7.3	4.1		0	0		-0.658139	-0.0751798		-1.3533	-0.629087		-0.575189	0.257101		0.157371	0.493867		-0.244471	0.144188	0	-0.36666	-0.991192	-0.159044	0.325619	-0.0501417
NPM3	O75607	10360	4	4	4	4	4	4	33.7	33.7	33.7	0	0	0	0.288293	1.25695	1.15134	-0.0444459	0.411181	0.316071	0.672885	1.08238	1.03073	0.936914	1.75477	1.50503	0.401342	1.25042	0.927715	0	0.89886	0.227602	0.928667	1.3989	0.859826
CRTAP	O75718	10491	12	13	14	12	13	14	32.2	36.4	35.7	0	0	0	-0.996651	-0.636203	-0.651852	-0.805128	-0.814896	-0.949624	-0.0988628	0.0521135	-0.0876696	0.421532	0.670617	0.315216	-0.0120048	0.229065	-0.124509	0	-0.761568	-0.856549	-0.0448063	0.469122	0.0308502
ATRN	O75882	8455	17	19	13	17	19	13	12.2	13.6	9.9	0	0	0	-0.829875	-0.602906	-0.831674	-0.232982	-0.310377	-0.702559	0.368131	0.11769	-0.265572	0.467078	0.485641	0.108008	0.423555	0.48323	0.044504	0	-0.754819	-0.415306	0.0734166	0.353576	0.317096
STC2	O76061	8614	7	7	7	6	6	6	29.8	29.8	29.8	0	0	0	-1.69241	-1.1263	-1.20913	-1.02475	-0.866835	-0.996867	-0.151543	0.0116475	-0.216985	0.352994	0.703182	0.4223	0.163117	0.457721	0.333811	0	-1.34261	-0.962816	-0.11896	0.492826	0.318216
PCF11	O94913	51585	2	2	1	2	2	1	1.5	1	0.5	0	0		-0.961172	0.037729		-0.507559	-0.156754		-0.00620997	0.40173		0.266909	0.957043		0.616335	0.536147		0	-0.461722	-0.332157	0.19776	0.611976	0.576241
GLS	O94925	2744	7	7	9	7	6	9	13.8	12.4	18.4	0	0	0	-0.313997	-0.125678	-0.368929	-0.763355	-0.699011	-1.42109	-0.244843	0.360541	-0.442708	0.626226	1.13122	0.106185	-0.171423	0.40963	-0.757816	0	-0.269535	-0.961154	-0.109003	0.621211	-0.173203
PRSS23	O95084	11098	11	9	12	11	9	12	43.9	34.2	46	0	0	0	-0.859232	-0.0929762	-0.563306	-0.0354493	0.436023	-0.252294	0.739902	1.17771	0.464942	0.940621	1.4147	0.941565	1.02706	1.49489	0.84743	0	-0.505171	0.0494265	0.794184	1.09896	1.12313
FKBP9	O95302	11328	17	17	14	16	16	13	32.5	32.5	23.7	0	0	0	-0.804801	-0.454021	-0.422144	-0.626183	-0.611702	-0.700555	-0.0401508	-0.126255	-0.156832	0.217501	0.438888	0.284747	-0.0888265	0.0364781	-0.106981	0	-0.560322	-0.646147	-0.107746	0.313712	-0.0531098
UTS2	O95399	10911	1	1	1	1	1	1	5.8	5.8	5.8	0	0	0	-0.229173	0.397424	0.259291	-0.245315	-0.0358711	-0.120074	0.39923	0.527587	0.439175	0.728347	1.2146	0.905201	0.415922	0.777179	0.461951	0	0.142514	-0.133753	0.45533	0.949381	0.551684
NTN1	O95631	9423	1	1	1	1	1	1	1.8	3.3	3.3	0	0	0	0.268172	-0.906393	-1.45478	0.830214	-1.16744	-1.11409	2.11111	0.230519	-0.33167	2.76403	0.931012	0.414616	2.57991	1.04056	-0.21582	0	-0.697666	-0.483771	0.669985	1.36988	1.13489
FSTL3	O95633	10272	3	3	3	3	3	3	15.2	15.2	13.7	0	0	0	-1.70692	-1.99887	-2.15853	-1.74145	-1.77897	-1.94248	-0.445542	-0.964943	-1.19385	-0.05429	-0.19385	-0.345498	0.509154	0.378117	0.246055	0	-1.95477	-1.82097	-0.868111	-0.19788	0.377775
TXNDC12	O95881	51060	7	7	6	7	7	6	43	43	34.3	0	0	0	-0.265286	-0.151413	0.316181	-0.223495	-0.440169	0.0891965	0.287685	0.0169041	0.554502	0.672966	0.639358	1.03086	0.279586	0.364101	0.76999	0	-0.0335062	-0.191489	0.286364	0.78106	0.471226
CHEK2	O96017	11200	2	1	2	2	1	2	4.2	2	5.5	0	0	0	-1.83993	1.20153	-0.935552	-1.49148	0.503155	-2.86524	-0.955934	1.6772	-0.417309	-1.83715	2.05135	-0.103272	-1.23675	1.87559	-0.525775	0	-0.524651	-1.28452	0.10132	0.0369746	0.0376875
GLUD1	P00367	2746	21	22	23	21	22	23	36.2	43.2	43	0	0	0	-0.582396	-0.118003	0.18031	-0.491984	-0.280038	-0.236455	0.166514	0.537339	0.397324	0.661271	1.24781	0.91904	0.182373	0.480246	0.446911	0	-0.173363	-0.336159	0.367059	0.942706	0.369843
GOT2	P00505	2806	24	21	22	24	21	22	53.3	51.4	54.7	0	0	0	0.63928	0.640934	0.800606	0.439743	0.292283	0.335862	0.854216	0.666021	0.819358	1.17988	1.35829	1.1645	0.684788	0.781763	0.718606	0	0.693607	0.355963	0.779865	1.23422	0.728386
PLAU	P00749	5328	17	18	20	17	18	20	36.7	46.2	48.7	0	0	0	-0.676451	0.0124634	0.143088	0.1937	0.334982	0.519228	0.945153	1.20003	1.08947	1.27097	1.71491	1.62017	1.04227	1.32793	1.484	0	-0.173634	0.349303	1.07822	1.53535	1.28474
PLAT	P00750	5327	15	14	13	15	14	13	31.3	31.3	28.6	0	0	0	-1.20061	-0.805358	-0.551211	-0.888854	-0.827764	-0.580979	0.140767	0.143466	0.291124	0.0520132	0.33462	0.444222	-0.472554	-0.344127	-0.0140384	0	-0.852394	-0.765866	0.191786	0.276952	-0.276907
SERPINC1	P01008	462	10	8	8	2	1	0	15.7	12.7	11	0	0		-0.127793	-0.477288		-0.26759	0.689754		0.849454	0.020038		-0.199373	0.272425		-0.831272	-0.316436		0	-0.302541	0.211082	0.434746	0.0365263	-0.573854
A2M	P01023	2	41	36	34	31	28	25	34.5	31.1	29	0	0	0	-0.238135	0.0238352	0.40292	0.707841	0.572928	0.926523	1.0461	0.820951	1.33789	1.24914	1.23655	1.72284	1.14231	1.14787	1.69734	0	0.0628735	0.735764	1.06832	1.40284	1.32917
TIMP1	P01033	7076	8	7	7	8	7	7	83.2	78.3	78.3	0	0	0	-1.74177	-1.17793	-0.965527	-1.11933	-0.950348	-0.818371	-0.296383	-0.298006	-0.204267	0.0614251	0.268435	0.424908	0.333632	0.491971	0.78844	0	-1.29508	-0.962682	-0.266218	0.25159	0.538014
CST3	P01034	1471	6	6	6	6	6	6	50.7	50.7	50.7	0	0	0	-1.28998	-0.498121	-0.0862984	-0.461792	-0.413858	-0.159482	0.5142	0.591027	0.401687	0.532869	0.767122	0.746516	0.210077	0.21604	0.395377	0	-0.624798	-0.345044	0.502305	0.682169	0.273832
CST1	P01037	1469	5	5	5	5	5	5	44.7	44.7	44.7	0	0	0	-2.21641	-2.81681	-1.78031	-1.34098	-2.39342	-1.84452	-0.115235	-1.38899	-0.707774	0.420611	-0.805104	0.160775	0.74621	-0.385484	0.544719	0	-2.27117	-1.85964	-0.737332	-0.0745724	0.301815
COL1A1	P02452	1277	34	37	36	32	35	34	27.4	30.6	31.1	0	0	0	-0.932507	-0.463171	-0.274641	0.27367	0.470093	0.283254	0.646129	0.674506	0.484135	0.922002	1.04855	0.96617	1.29051	1.45742	1.3849	0	-0.556773	0.342339	0.60159	0.978906	1.37761
COL2A1	P02458	1280	13	16	18	12	13	15	10	12.8	13.3	0	0	0	-1.61115	-1.52806	-2.33251	0.338378	0.036434	-0.949045	1.0632	0.527575	-0.451499	1.22716	0.908438	-0.00314996	1.18957	0.747298	-0.0701217	0	-1.82391	-0.191411	0.379759	0.710816	0.62225
COL3A1	P02461	1281	23	20	21	14	10	11	17.9	14.2	15.6	0	0	0	0.123544	0.520792	0.525674	1.20387	1.21204	0.857257	1.80013	1.51255	1.15733	1.67865	1.55103	1.37936	1.50476	1.33995	1.15023	0	0.390003	1.09106	1.49	1.53635	1.33165
COL4A1	P02462	1282	6	6	7	6	6	7	5.2	5.2	6.3	0	0	0	-0.184848	0.277669	0.555372	1.36665	1.06282	1.23304	2.07662	1.74034	1.87244	2.44518	2.27854	2.39748	2.71746	2.47052	2.54399	0	0.216064	1.22083	1.89646	2.37373	2.57733
APOE	P02649	348	21	22	21	18	18	17	60.3	63.1	62.8	0	0	0	-0.743786	-0.665058	-0.58758	0.0830555	-0.326867	-0.29586	1.00502	0.698438	0.620406	1.85348	1.69092	1.69931	2.49905	2.4036	2.53309	0	-0.665475	-0.17989	0.774622	1.74791	2.47858
APOH	P02749	350	7	4	6	5	2	4	30.1	15.1	25.8	0	0	0	-0.976005	-0.133286	-0.426819	-0.326468	-0.207511	-0.85907	-0.258832	0.0465089	-0.562147	0.172522	0.542048	-0.421409	2.29175	1.89193	1.80282	0	-0.512037	-0.46435	-0.258157	0.0977205	1.9955
FN1	P02751	2335	93	95	94	93	95	94	50.9	50.6	50.7	0	0	0	-1.91335	-1.45938	-1.11938	-0.909924	-0.827674	-0.849359	-0.159455	-0.173294	-0.218118	0.47527	0.713268	0.725601	1.08098	1.23803	1.19867	0	-1.49737	-0.862319	-0.183622	0.638046	1.17256
ORM1	P02763	5004	1	1	1	1	1	1	7.5	7.5	4		0	0		-0.682229	0.620656		-1.06465	0.469657		-0.880771	1.10305		-0.4077	-0.711888		1.3521	5.00741	0	-0.0307866	-0.297497	0.11114	-0.559794	3.17975
ANG	P03950	283	1	1	2	1	1	2	6.1	6.1	12.9	0	0	0	-0.697983	-0.637937	-2.13983	-0.321161	-0.773552	-2.28766	0.829184	0.205112	-1.57876	1.0392	0.569872	-1.22877	0.634861	0.0929174	-1.77736	0	-1.15858	-1.12746	-0.18149	0.126767	-0.34986
MMP1	P03956	4312	25	26	26	25	26	26	56.3	56.3	56.3	0	0	0	0.359004	0.0892747	0.540421	1.54802	0.877212	0.915072	2.26081	1.75768	1.7077	2.61565	2.18897	2.19483	2.25406	1.87757	1.94047	0	0.329566	1.11344	1.90873	2.33315	2.02403
ALDOA	P04075	226	25	27	28	20	21	22	80.2	81.6	86.3	0	0	0	-0.905887	-0.315281	-0.0543993	-0.998371	-1.10114	-0.867546	-0.15563	-0.145653	-0.216362	0.213881	0.353866	0.232074	-0.370297	-0.408512	-0.217727	0	-0.425189	-0.989019	-0.172548	0.266607	-0.332179
CSF2	P04141	1437	1	1	1	1	1	1	15.3	15.3	15.3	0	0		-1.34392	-0.298734		-0.0788282	0.693381		1.33571	2.17655		2.60032	3.56729		2.10757	2.85951		0	-0.821328	0.307276	1.75613	3.0838	2.48354
RPN2	P04844	6185	4	3	2	4	3	2	9.8	9.4	4.3	0		0	-0.888123		-0.252857	0.0503136		0.0823469	1.08921	-4.49511	0.669244	1.11303	-3.74686	1.62813	1.11925	-4.63356	0.642155	0	-0.57049	0.0663303	-0.912217	-0.335232	-0.957386
ISG15	P05161	9636	7	7	6	7	7	6	45.5	45.5	41.2	0	0	0	-0.379475	0.0484189	-0.0407421	-0.0928573	0.0532034	-0.181971	0.291711	0.59165	0.362527	0.300117	0.863613	0.503477	-0.354313	0.22645	-0.0549098	0	-0.123933	-0.073875	0.415296	0.555736	-0.0609243
ALPL	P05186	249	2	3	1	2	3	1	4.2	6.5	2.3		0	0		-1.59444	-0.175229		-1.59253	0.169319		-0.470693	0.455666		0.472823	1.47229		1.2119	1.77495	0	-0.884835	-0.711603	-0.00751349	0.972559	1.49342
ICAM1	P05362	3383	8	11	10	8	11	10	17.7	30.5	23.7	0	0	0	-0.42211	-0.558571	-0.30512	0.453508	-0.272081	-0.0756617	1.43735	0.83255	0.97416	2.1635	1.82241	1.88127	2.01581	1.57634	1.7818	0	-0.4286	0.0352549	1.08135	1.95573	1.79132
RPLP2	P05387	6181	9	9	8	8	8	7	92.2	92.2	92.2	0	0	0	-0.0676113	0.439673	0.416164	-0.113602	-0.193776	-0.254812	0.427312	0.414591	0.29258	0.906855	1.18744	0.906943	0.79028	1.00082	0.77145	0	0.262742	-0.187397	0.378161	1.00041	0.854182
COL5A2	P05997	1290	15	17	17	15	16	16	12.7	16.7	14.1	0	0	0	-0.32076	0.434476	0.403655	0.655912	0.763709	0.686633	1.39231	1.44625	1.17833	1.6077	1.9087	1.70374	1.54834	1.754	1.61577	0	0.172457	0.702085	1.33896	1.74005	1.63937
GLA	P06280	2717	10	10	10	10	10	10	27.5	27.5	27.5	0	0	0	-0.524377	0.00179827	-0.210725	-0.491663	-0.264597	-0.665716	0.0826014	0.530676	0.0943256	0.377241	0.959794	0.55156	0.0817108	0.696162	0.276592	0	-0.244435	-0.473992	0.235868	0.629531	0.351488
CCK	P06307	885	1	1	1	1	1	1	7.8	7.8	7.8	0	0		1.36551	0.98735		-0.653727	-0.752497		2.70636	2.19971		1.57564	1.36322		1.7565	1.39062		0	1.17643	-0.703112	2.45303	1.46943	1.57356
SERPINE2	P07093	5270	23	24	25	23	24	25	55.3	55.5	55.8	0	0	0	-0.480256	-0.251629	-0.548731	-0.0359135	-0.0438895	-0.552711	0.398583	0.798025	0.187258	1.04291	1.24397	0.640111	1.01536	1.35382	0.695622	0	-0.426872	-0.210838	0.461289	0.975665	1.0216
P4HB	P07237	5034	30	33	36	30	33	36	53.7	55.7	63.6	0	0	0	-0.492677	-0.024861	-0.0969297	-0.407366	-0.340303	-0.403787	0.16176	0.216446	0.19048	0.525538	0.844391	0.631613	0.140113	0.490661	0.29367	0	-0.204822	-0.383819	0.189562	0.667181	0.308148
ANXA2	P07355	302	28	28	29	28	28	29	69.6	69.6	69.9	0	0	0	-0.22879	-0.578082	-0.211254	-0.362442	-1.04975	-0.829045	0.185496	-0.0877329	-0.0449321	0.731732	0.656055	0.546698	0.259699	0.0367969	-0.0263914	0	-0.339376	-0.747079	0.0176102	0.644828	0.0900349
DCN	P07585	1634	15	15	15	14	14	14	44.6	44.6	44.6	0	0	0	-0.283469	0.276005	0.227428	0.858935	0.826821	0.820303	1.43431	1.44545	1.33672	1.96314	2.1475	2.00303	2.3037	2.38179	2.3324	0	0.0733215	0.835353	1.40549	2.03789	2.33929
PSAP	P07602	5660	22	24	25	22	24	25	44.3	50.2	50.8	0	0	0	0.0163974	0.222864	0.284741	0.311178	0.204492	0.12319	0.918179	0.7153	0.720577	1.22818	1.32828	1.23556	1.0927	1.14319	1.15182	0	0.174668	0.212953	0.784685	1.26401	1.12923
HEXB	P07686	3074	17	17	15	17	17	15	30.9	28.8	25	0	0	0	-0.98862	-0.481682	-0.403134	-1.04081	-0.714416	-0.835196	-0.496269	-0.13303	-0.379618	-0.135927	0.405408	0.148578	-0.578096	-0.0587466	-0.231598	0	-0.624478	-0.863474	-0.336305	0.139353	-0.28948
PFN1	P07737	5216	12	10	13	7	5	8	89.3	87.9	91.4	0	0	0	-1.15749	-0.693408	-0.539025	-1.32129	-1.32923	-1.57692	-0.158676	-0.301517	-0.741797	0.159351	0.376208	-0.0350345	-0.476516	-0.473087	-0.630468	0	-0.79664	-1.40915	-0.400664	0.166842	-0.526691
CTSB	P07858	1508	14	13	13	14	13	13	45.4	40.1	40.1	0	0	0	-1.38827	-0.853566	-1.03732	-0.637272	-0.525947	-0.646567	0.113431	0.105935	0.0542857	0.716924	1.01086	0.896501	1.11273	1.39008	1.44633	0	-1.09305	-0.603262	0.091217	0.874761	1.31638
FH	P07954	2271	14	15	16	14	15	16	33.3	34.7	38.6	0	0	0	-1.17384	0.139746	0.232569	-0.982223	-0.510769	-0.350673	-0.310173	0.290667	0.192122	-0.0294233	0.812858	0.545187	-0.571009	0.12714	0.0847369	0	-0.267175	-0.614555	0.0575387	0.442874	-0.119711
THBS1	P07996	7057	62	61	61	17	15	17	59.9	62.4	62.1	0	0	0	-0.677165	-0.687992	-0.338677	-0.0832952	-0.288238	-0.428471	0.656429	0.380168	0.372586	1.58641	1.54523	1.50445	2.28017	2.23408	2.08607	0	-0.567945	-0.266668	0.469728	1.54536	2.20011
MMP2	P08253	4313	32	34	34	31	33	33	49.8	56.1	55.3	0	0	0	-1.28787	-0.754362	-0.789956	-0.954804	-0.88353	-0.920524	-0.596539	-0.500721	-0.591015	-0.269454	0.0222955	-0.0948943	0.154242	0.384808	0.335502	0	-0.944061	-0.919619	-0.562758	-0.114018	0.291517
MMP3	P08254	4314	27	27	27	24	24	24	39.2	39	39.2	0	0	0	-1.41415	-0.981246	-1.16612	-0.295107	-0.113691	-0.410469	1.46612	1.49902	1.19995	2.95865	3.16863	2.81973	3.0329	3.14449	3.04402	0	-1.18717	-0.273089	1.38837	2.98234	3.0738
SOD3	P08294	6649	6	8	8	6	8	8	39.6	42.9	42.9	0	0	0	-1.92857	-0.651136	-0.859296	-0.414373	0.257684	-0.377211	0.524911	1.00645	0.331983	0.83732	1.685	0.886889	0.699031	1.52718	0.74326	0	-1.14633	-0.177966	0.621116	1.1364	0.989825
INHBA	P08476	3624	16	17	14	16	17	14	38.3	43	36.4	0	0	0	-1.35469	-1.36622	-1.14485	-0.722587	-0.914273	-0.715391	0.824503	0.491786	0.590063	1.78292	1.457	1.72077	2.0701	1.73431	2.1784	0	-1.28859	-0.784084	0.635451	1.65356	1.99427
PDHA1	P08559	5160	7	6	9	7	6	9	17.2	14.4	19.5	0	0	0	-1.29943	0.01098	0.168114	-1.57179	-0.824368	-0.755575	-0.356251	0.487935	0.399716	0.0604641	1.3508	0.952976	-0.472137	0.683378	0.282261	0	-0.373444	-1.05058	0.177133	0.78808	0.164501
CD14	P08571	929	6	5	6	6	5	6	22.1	16.5	18.9	0	0	0	-2.36122	-1.14745	-0.226028	-2.09212	-1.53257	-0.691387	-1.38845	-0.396455	0.115252	-0.812578	0.356552	0.822456	-1.51021	-0.283426	0.415445	0	-1.2449	-1.43869	-0.55655	0.122143	-0.459399
COL4A2	P08572	1284	15	16	17	15	16	17	12.3	14	14.5	0	0	0	-0.20937	0.250359	0.397157	1.23708	1.14178	1.17428	1.97943	1.74368	1.71375	2.23229	2.25243	2.22876	2.53417	2.3055	2.34729	0	0.146049	1.18438	1.81228	2.23783	2.39565
MMP7	P09237	4316	3	2	3	2	1	2	8.6	5.2	8.6			0	-3.43682	-1.51172	-0.86486	-2.28274	-0.810208	-0.384627	-0.862817	0.360143	0.681681	-0.203373	1.5901	1.74577	0.555486	1.58631	2.12418	0	-1.9378	-1.15919	0.0596691	1.04416	1.42199
CXCL1	P09341	2919	5	4	5	4	3	4	45.8	44.9	45.8	0	0	0	1.89656	2.06026	1.07505	2.82173	2.47815	1.56549	4.64931	4.25541	3.21938	5.67897	5.58988	4.37617	5.28395	5.12175	4.26542	0	1.67729	2.28846	4.04137	5.21501	4.89037
HMGB1	P09429	3146	12	14	14	9	11	11	40.5	43.7	43.7	0	0	0	0.707736	1.24431	0.913898	0.607658	1.1027	0.333673	1.13662	1.2398	0.934318	1.42844	1.77141	1.34195	0.929621	1.48267	0.881106	0	0.955316	0.681343	1.10358	1.51393	1.0978
SPARC	P09486	6678	18	18	18	5	5	6	53.5	61.4	64.7	0	0	0	-0.572865	-0.422303	-0.0130453	0.530954	0.2958	0.537986	0.890913	0.499334	0.833728	0.999541	0.836381	1.12707	1.30882	1.24429	1.51993	0	-0.336071	0.454913	0.741325	0.987664	1.35768
CSF1	P09603	1435	9	8	7	9	8	7	19	16.1	15.3	0	0	0	-1.17837	-0.389466	-0.185741	-0.589661	-0.187943	-0.0822661	-0.258656	-0.0501265	0.160892	-0.283343	0.034522	0.357332	-0.891023	-0.27778	-0.0181343	0	-0.584526	-0.286623	-0.049297	0.0361703	-0.395646
PDGFRB	P09619	5159	12	12	12	12	12	12	13.4	12.1	13.1	0	0	0	-1.29911	-0.417143	-0.98511	-0.540773	-0.19562	-0.947043	-0.0575025	0.398398	-0.392291	0.133497	0.866593	0.0629652	0.302318	0.923419	0.0159083	0	-0.900454	-0.561145	-0.0171319	0.354352	0.413882
CSF3	P09919	1440	4	3	3	4	3	3	15	10.1	10.1	0	0	0	-2.4059	0.849478	0.927951	-2.05804	0.622724	1.09598	-0.235463	2.4972	2.81909	0.919436	3.69442	3.98034	0.558418	3.25175	4.04662	0	-0.209491	-0.113111	1.69361	2.86473	2.61893
SAA1	P0DJI8	6288	2	2	0	2	2	0	29.5	27.9	0	0	0		-2.44255	-0.225222		-2.26817	0.359592		-1.58127	0.444855		-0.844677	1.15371		-1.00757	1.23156		0	-1.33388	-0.95429	-0.56821	0.154514	0.111996
CSH1	P0DML3	1442	3	4	5	3	4	5	14.3	17.5	23.5	0	0	0	-3.37318	-0.879762	-0.81805	-1.39714	-1.67219	-0.932532	-0.272011	-0.367005	0.0620297	1.02142	1.26282	1.67392	1.75238	2.10427	2.52045	0	-1.69033	-1.33395	-0.192329	1.31939	2.1257
GAA	P10253	2548	8	10	9	8	10	9	9.5	12.4	10.5	0	0	0	-0.880442	-0.912237	-0.456935	-0.357585	-0.809745	-0.462138	0.307831	-0.161347	0.192596	0.657738	0.428827	0.777596	0.4068	0.144025	0.458318	0	-0.749871	-0.543156	0.113027	0.621387	0.336381
SPP1	P10451	6696	17	17	17	16	16	16	51.3	58.6	60.2	0	0	0	0.238802	0.536913	0.298636	0.880775	0.646631	0.972623	2.02458	1.43378	1.81307	2.64113	2.44351	3.12592	3.17991	3.00705	3.36258	0	0.358117	0.833343	1.75714	2.73685	3.18318
TFPI	P10646	7035	7	8	9	7	8	9	28.6	34.5	34.5	0	0	0	-1.26875	-0.464383	-1.16589	-0.568332	-0.262857	-0.937715	-0.063948	0.193577	-0.504261	0.123922	0.478634	-0.138117	0.0196639	0.467714	-0.0445531	0	-0.966341	-0.589634	-0.124877	0.154813	0.147608
CLU	P10909	1191	14	12	12	14	12	12	34.5	29.6	27.6	0	0	0	-1.01072	0.719196	0.723164	-0.699052	0.602404	0.461759	-0.394331	0.898622	0.82869	-0.261986	1.1929	1.16793	-0.456374	0.969958	1.01741	0	0.14388	0.121704	0.444327	0.699616	0.510333
HAPLN1	P10915	1404	6	3	6	5	2	5	19.2	9	24.6	0	0	0	-2.37286	-1.51464	-1.80467	-1.34047	-0.840412	-1.35951	-0.714891	-0.180506	-0.626744	-0.221906	0.553202	0.178002	0.431294	0.94257	0.795222	0	-1.89739	-1.18013	-0.507381	0.169766	0.723029
HSPA5	P11021	3309	38	39	40	36	37	38	52.8	55.2	56.9	0	0	0	-0.492325	-0.0597013	-0.162112	-0.371049	-0.466797	-0.576862	0.108547	0.116378	-0.0166109	0.491178	0.770874	0.418036	0.13312	0.364215	0.0699932	0	-0.238046	-0.471569	0.0694381	0.56003	0.189109
LAMC1	P11047	3915	69	66	67	68	65	66	50.1	46.1	46.9	0	0	0	-0.328844	-0.118585	0.121506	0.528733	0.362628	0.464393	1.12928	0.803702	1.04206	1.32204	1.32378	1.43811	1.17868	1.14935	1.22826	0	-0.108641	0.451918	0.991679	1.36131	1.18543
UMPS	P11172	7372	5	3	4	5	3	4	9	5	7.5	0	0	0	-0.630788	-0.505983	-0.506552	-1.14552	-1.03786	-1.35165	-0.358372	-0.0769464	-0.40718	-0.037274	0.761111	0.247925	-0.464836	0.360585	-0.511731	0	-0.547774	-1.17834	-0.280833	0.323921	-0.205327
COL11A1	P12107	1301	22	27	23	20	23	19	12.6	15.4	14.1	0	0	0	-0.777937	-0.114694	-0.274787	0.201299	0.211099	0.0900004	0.81447	0.787302	0.819969	1.21239	1.4314	1.32347	1.35963	1.47261	1.47587	0	-0.389139	0.167466	0.807247	1.32242	1.43604
COL6A1	P12109	1291	37	36	36	37	36	36	39.7	40.1	37.9	0	0	0	-0.217686	0.440753	0.859507	1.33834	1.44573	1.76291	2.08972	2.1754	2.48694	2.32324	2.61914	2.86527	2.47158	2.7283	3.00454	0	0.360858	1.51566	2.25069	2.60255	2.73481
COL6A2	P12110	1292	31	32	30	31	32	30	30.5	31.5	29.6	0	0	0	0.0391356	0.695027	0.78894	1.40003	1.67146	1.48991	2.05277	2.15268	2.07037	2.31508	2.65106	2.51487	2.39276	2.68298	2.55564	0	0.507701	1.52047	2.09194	2.49367	2.54379
COL6A3	P12111	1293	139	136	132	7	8	7	46.9	47.1	46.1	0	0	0	-0.484546	-0.0538611	0.271153	0.229153	0.237259	0.48684	0.861886	0.828496	1.01228	1.15515	1.26923	1.32524	1.41288	1.51088	1.54525	0	-0.0890847	0.317751	0.900888	1.24987	1.48967
IFI30	P13284	10437	3	2	2	3	2	2	13.2	8	8	0	0	0	-0.817365	-0.325277	0.28111	-0.655604	-0.306367	-0.294137	-0.272319	0.389	0.0802467	0.19117	0.865468	0.592884	-0.11523	0.851104	0.929566	0	-0.287177	-0.418703	0.0656428	0.549841	0.555147
BMP1	P13497	649	21	21	21	21	21	21	22.5	23.3	23.7	0	0	0	-1.7518	-1.28659	-1.12165	-0.79471	-0.621276	-0.851005	-0.126686	-0.0721126	-0.242817	0.246615	0.611204	0.339588	0.750479	1.06931	0.742971	0	-1.38668	-0.755664	-0.147205	0.399136	0.854254
CCL2	P13500	6347	2	2	2	2	2	2	18.2	18.2	18.2	0	0	0	1.80795	1.34177	1.97447	2.69492	2.03246	2.61588	3.95693	3.04676	3.6037	4.24049	3.58049	4.19413	3.7005	2.98257	3.80755	0	1.70806	2.44775	3.5358	4.00504	3.49687
CCL5	P13501	6352	2	1	3	2	1	3	17.6	8.8	29.7	0	0	0	1.92989	-0.123869	1.51637	2.91134	0.379243	2.13906	3.41556	0.56356	2.11454	2.90227	0.465997	2.10218	2.24087	0.309017	1.63641	0	1.10746	1.80988	2.03122	1.82348	1.39543
SCG2	P13521	7857	9	9	8	9	9	8	14.1	14.1	13	0	0	0	0.689835	1.58162	1.23548	1.13405	1.69316	1.32754	1.35409	1.5631	1.38356	0.242085	0.750002	0.485743	-0.378822	0.3624	-0.249619	0	1.16898	1.38492	1.43358	0.49261	-0.0886803
VCAN	P13611	1462	31	35	37	16	17	19	8.5	9.9	10	0	0	0	-0.64278	-0.422318	-0.0535143	0.202595	0.223022	0.44967	1.00867	0.824258	1.24158	1.44751	1.63459	1.92595	1.66572	1.96054	2.19382	0	-0.372871	0.291762	1.02484	1.66935	1.94003
ITGA4	P13612	3676	18	18	13	18	18	13	20.3	20.3	14.5	0	0	0	-0.703685	-0.331447	-0.89987	-0.221363	-0.527106	-0.969724	0.0844398	-0.0492995	-0.54196	0.13341	0.360865	-0.199675	-0.165637	-0.0996058	-0.80118	0	-0.645	-0.572731	-0.16894	0.0981997	-0.355474
MT1G	P13640	4495	4	4	4	1	1	1	67.7	67.7	67.7		0	0	-2.50011	-0.443477	-1.92142	-2.51119	-0.0941823	-1.91139	-0.241371	0.668689	-0.140925	0.765828	1.84602	0.64932	0.893724	2.26922	1.39706	0	-1.62167	-1.50559	0.0954642	1.08706	1.52
PDIA4	P13667	9601	41	42	40	41	42	40	57.7	55.8	55.2	0	0	0	-0.1218	0.404551	0.283384	0.259853	0.345612	0.164545	0.854233	0.967158	0.820768	1.29853	1.61563	1.34283	0.97594	1.29201	1.03033	0	0.188711	0.25667	0.88072	1.419	1.09942
P4HA1	P13674	5033	20	14	16	20	14	16	36.7	26	31.8	0	0	0	-0.742521	-0.249516	-0.186201	-0.629348	-0.592558	-0.586726	0.131554	0.297441	0.0846091	0.555243	0.870497	0.560518	0.148752	0.278018	0.125864	0	-0.392746	-0.602877	0.171201	0.662086	0.184212
MTHFD2	P13995	10797	5	3	2	5	3	2	16.6	8.6	4.9	0	0	0	-1.13249	-0.487262	-0.0770876	-1.11596	-1.3058	-0.959743	-0.266843	-0.0131699	-0.243246	0.173213	0.677276	0.285259	-0.629214	-0.0541981	1.47459	0	-0.565614	-1.12717	-0.17442	0.378583	0.263727
MIF	P14174	4282	3	3	3	3	3	3	23.5	23.5	23.5	0	0	0	-1.06506	-1.07548	-0.355755	-1.33317	-1.56895	-1.34568	-0.116944	-0.525411	-0.136217	0.552313	0.555366	0.605804	-0.057098	-0.250204	-0.0630553	0	-0.8321	-1.41593	-0.259524	0.571161	-0.123453
CD99	P14209	4267	2	2	2	1	1	1	13	13	13	0	0	0	0.0217772	0.00649429	0.573714	-0.123414	-0.498538	-0.290434	0.706655	-0.0326694	-0.0456928	0.863342	0.714905	0.310019	0.495053	0.361563	0.112768	0	0.200662	-0.304129	0.209431	0.629422	0.323128
HGF	P14210	3082	18	17	18	18	17	18	23.6	23.9	27.6	0	0	0	-0.58853	-0.407967	-0.61089	0.154983	-0.0278585	-0.388417	1.05838	0.827852	0.567742	1.0634	0.942623	0.730964	0.313047	0.240425	0.0681307	0	-0.535796	-0.0870977	0.817991	0.912329	0.207201
FDPS	P14324	2224	9	9	10	9	9	10	22.9	22.9	22.9	0	0	0	0.623946	0.697682	0.689781	0.883017	0.514363	0.453142	1.51442	1.25545	1.1174	1.8853	1.71845	1.55346	1.35022	1.28071	1.13992	0	0.67047	0.616841	1.29576	1.71907	1.25695
NID1	P14543	4811	35	31	34	34	30	33	36	33.9	32.7	0	0	0	-0.809153	-0.566228	-0.517771	-0.216951	-0.391795	-0.448405	0.20512	-0.0857668	-0.0521295	0.296232	0.249382	0.185767	0.150891	0.0906193	0.0255934	0	-0.63105	-0.352384	0.022408	0.243794	0.0890345
HSP90B1	P14625	7184	44	47	45	42	45	44	50.3	53.7	53.2	0	0	0	-0.451461	0.110166	0.0538927	-0.308689	-0.178603	-0.221995	0.359657	0.604999	0.501197	0.827501	1.28314	0.991108	0.44309	0.831946	0.612459	0	-0.0958009	-0.236429	0.488617	1.03392	0.629165
MMP9	P14780	4318	15	13	10	15	13	10	26	23.6	17.4	0	0	0	-2.52698	-2.83075	-2.29078	-2.48171	-2.55466	-2.43404	0.0857981	-0.543748	-0.200511	1.69781	1.5477	1.70749	2.76643	2.52261	2.75337	0	-2.5495	-2.49014	-0.219487	1.651	2.6808
LIF	P15018	3976	0	3	2	0	3	2	0	19.3	10.9		0	0		-0.688747	-1.52758		-0.868555	-1.74063		0.346352	-0.963979		1.30449	-0.457367		1.24724	-0.23606	0	-1.10817	-1.30459	-0.308814	0.423563	0.505591
ANPEP	P15144	290	38	39	34	38	39	34	35.3	35.3	32.7	0	0	0	-0.718403	-0.213965	-0.259587	-0.332817	-0.551538	-0.510158	-0.176861	-0.210141	-0.242434	-0.200593	0.225463	0.144856	-0.396344	-0.212553	-0.409557	0	-0.397318	-0.464838	-0.209812	0.0565755	-0.339484
B4GALT1	P15291	2683	5	5	3	5	5	3	19.3	19.3	7	0	0	0	-1.11708	-1.26272	-0.872034	-0.918019	-1.24038	-1.18447	-0.16355	-0.359252	-0.36386	0.095109	0.168128	0.304684	0.0784264	0.192944	0.252455	0	-1.08394	-1.11429	-0.295554	0.189307	0.174608
ACPP	P15309	55	7	8	7	7	8	7	19.2	21	19.4	0	0	0	-0.75163	-1.82834	-1.4402	0.470507	-0.792552	-0.796004	1.31882	0.152988	0.0655216	1.95503	1.05657	0.98946	2.9525	1.95541	1.81009	0	-1.34006	-0.372683	0.512444	1.33369	2.23933
NME1	P15531	4830	10	11	11	1	1	1	70.4	70.4	70.4	0	0	0	0.406494	0.127981	0.597697	0.041871	-0.625252	-0.237558	0.924925	0.528535	0.451868	1.03874	0.648425	0.986836	0.76356	0.202547	0.533685	0	0.37739	-0.273647	0.635109	0.891334	0.499931
GNS	P15586	2799	12	11	9	12	11	9	28.1	23.2	16.5	0	0	0	-1.03019	-0.586767	-0.589872	-0.784657	-0.791346	-0.846592	-0.116002	-0.151059	-0.21995	0.26341	0.580488	0.324642	0.0240099	0.280739	0.108845	0	-0.735608	-0.807532	-0.162337	0.389513	0.137865
TIMP2	P16035	7077	13	12	14	13	12	14	43.2	42.7	43.2	0	0	0	-0.96511	-0.568735	-0.583035	-0.391425	-0.364068	-0.58261	0.123161	0.0037711	-0.171598	0.120695	0.271656	0.156513	0.145819	0.324201	0.171477	0	-0.705627	-0.446034	-0.0148885	0.182955	0.213832
NQO2	Q5TD07	4835	7	8	6	7	8	6	47.2	56	41.5	0	0	0	-0.641442	-0.565985	-1.23489	-0.798566	-1.03942	-1.59617	-0.241774	-0.313919	-0.799816	0.249818	0.305313	-0.277728	-0.279622	0.133092	-0.576701	0	-0.814107	-1.14472	-0.451836	0.092468	-0.241077
PDGFRA	P16234	5156	3	1	3	3	1	3	2.8	0.7	2.8	0		0	0.697032		-0.646031	0.616568		-0.946177	1.32611		-0.518464	1.40753		-0.304829	1.19462		-0.235714	0	0.0255001	-0.164805	0.403824	0.55135	0.479455
GLB1	P16278	2720	6	7	6	6	7	6	11.2	12.4	10.2	0	0	0	-0.783835	-0.330394	-1.53597	-0.68175	-0.717048	-1.80179	-0.0515335	0.0307327	-1.20223	0.279836	0.604429	-0.732949	-0.0548945	0.2193	-1.01638	0	-0.883401	-1.06686	-0.407676	0.0504386	-0.283992
CPE	P16870	1363	3	3	4	1	0	2	7.8	6.9	9	0		0	-1.26765		-1.09804	-0.517462		-0.649885	0.493054		0.285889	1.02149		0.966056	1.72197		1.73169	0	-1.18285	-0.583674	0.389471	0.993775	1.72683
GM2A	P17900	2760	7	7	6	7	7	6	45.1	45.1	34.7	0	0	0	-0.887602	-1.56285	-0.79338	-0.394086	-1.56185	-0.958682	0.473675	-0.658132	-0.063059	0.918201	0.0868441	0.672304	0.851706	-0.0565896	0.682183	0	-1.08128	-0.971539	-0.0825054	0.559116	0.492433
LGALS3	P17931	3958	9	11	8	9	11	8	31.2	39.6	29.2	0	0	0	-0.386269	-0.295909	0.118569	-0.20252	-0.648601	-0.267618	0.38909	0.185199	0.344671	0.724816	0.645436	0.714631	0.133946	-0.0923487	0.0846681	0	-0.18787	-0.372913	0.30632	0.694961	0.0420886
FLT1	P17948	2321	25	26	26	25	26	26	18.6	18.9	18.4	0	0	0	-1.03621	-0.385922	0.115029	0.00158126	0.24746	0.717794	0.804343	0.980035	1.35109	1.20869	1.68974	2.01955	1.18345	1.51624	1.9827	0	-0.4357	0.322279	1.04516	1.63933	1.5608
IGFBP2	P18065	3485	15	16	14	15	16	14	54.2	56.6	52	0	0	0	-1.71208	-1.13515	-1.31613	-0.426037	-0.314177	-0.320913	0.394805	0.312314	0.451631	0.542173	0.859043	0.777165	0.456597	0.683669	0.702374	0	-1.38779	-0.353709	0.38625	0.726127	0.614213
SDC1	P18827	6382	3	3	3	3	3	3	15.8	15.8	15.8	0	0	0	0.0748699	-0.510026	-0.318315	-0.0370186	-0.795743	-0.727253	0.546985	-0.57498	-0.373948	0.727263	-0.107278	-0.00559827	-0.0367279	-0.592814	-0.69473	0	-0.251157	-0.520005	-0.133981	0.204795	-0.441424
CXCL2	P19875	2920	3	3	3	1	1	1	37.4	37.4	37.4	0	0	0	-3.16731	-1.65465	-1.43075	-2.68595	-1.68579	-1.65028	-1.51352	-0.476232	-0.584283	-0.668222	0.92666	0.528318	-1.49237	-0.469871	-0.0869729	0	-2.08424	-2.00734	-0.858013	0.262252	-0.683072
PI3	P19957	5266	9	8	9	9	8	9	57.3	57.3	57.3	0	0	0	-0.526123	-2.19581	-0.658454	2.52068	0.442715	1.36839	3.69709	1.44212	2.51353	4.88647	2.76835	3.65254	5.41686	3.25705	4.25099	0	-1.12679	1.44393	2.55091	3.76912	4.3083
IL11	P20809	3589	3	3	2	3	3	2	15.6	15.6	10.1	0	0	0	-0.873324	-0.592539	0.157968	-1.01565	-0.951307	-0.520482	0.482599	0.334959	0.906789	1.31394	1.38563	2.08404	2.22243	1.97647	3.21792	0	-0.435965	-0.829147	0.574782	1.59454	2.47227
COL5A1	P20908	1289	19	21	22	14	15	16	12.9	14.5	14.5	0	0	0	-1.52431	-0.633666	-0.659232	0.179556	0.600127	0.477528	1.01961	1.34027	1.25082	1.46645	2.06644	1.85046	1.73442	2.33257	2.21768	0	-0.93907	0.41907	1.20357	1.79445	2.09489
PTN	P21246	5764	4	4	6	4	4	6	22	22	36.9	0	0	0	0.0373414	0.582634	0.283422	0.494583	0.564617	0.401365	0.749086	0.759807	0.662044	0.904401	1.08517	1.04179	0.687563	0.995902	0.935779	0	0.301133	0.486855	0.723646	1.01045	0.873081
BGN	P21810	633	14	14	14	7	7	7	46.5	46.5	46.5	0	0	0	-0.627017	-0.138703	-0.0854454	0.435954	0.352934	0.464429	0.96061	0.881775	0.922087	1.38911	1.50523	1.46649	2.16124	2.29648	2.31626	0	-0.283722	0.417773	0.92149	1.45361	2.25799
SDHB	P21912	6390	2	4	6	2	4	6	7.5	14.6	23.2	0	0	0	-0.434194	0.0904488	0.115392	-0.969538	-0.752946	-0.635751	0.131678	0.794277	0.443966	0.622883	1.35946	0.802217	0.332519	0.707901	0.33276	0	-0.0761176	-0.786078	0.45664	0.928187	0.457727
GAL	P22466	51083	3	4	5	3	4	5	25.2	37.4	38.2	0	0	0	-0.97943	-2.7069	-2.00443	-0.372664	-2.16911	-2.02064	0.9524	-0.833627	-0.71507	1.71568	-0.128441	0.204676	1.68956	-0.181316	0.24133	0	-1.89692	-1.52081	-0.198766	0.597304	0.58319
PPIB	P23284	5479	14	14	13	14	14	13	55.1	55.1	55.1	0	0	0	0.0860962	-0.194369	0.346916	-0.384943	-0.83598	-0.0233036	0.559179	0.579973	0.663362	1.06908	1.13016	1.04512	0.571159	0.209556	0.562167	0	0.0795477	-0.414742	0.600838	1.08145	0.447628
LAMA2	P24043	3908	108	102	99	2	2	2	37.1	36.3	35.1	0	0	0	-0.809173	0.00686606	-0.24958	0.431886	0.760476	0.358406	1.04004	1.25893	0.944505	1.12958	1.62833	1.22546	0.90843	1.39343	0.970359	0	-0.350629	0.516923	1.08116	1.32779	1.09074
MMP11	P24347	4320	4	5	4	4	5	4	8	10.2	9	0	0	0	-0.594077	-0.397173	-0.614239	-0.872955	-0.778943	-0.846059	-0.46582	-0.439702	-0.556282	-0.214017	0.115465	-0.00890864	0.38343	0.446649	0.311869	0	-0.535163	-0.832652	-0.487268	-0.0358201	0.380649
ATP5PB	P24539	515	6	4	4	6	4	4	28.2	17.9	20	0	0	0	-0.224699	-0.220868	0.033142	-0.684657	-1.51023	-0.69044	0.502315	-0.323204	0.296227	0.660497	0.813784	1.36665	0.295849	0.17022	0.194119	0	-0.137475	-0.961777	0.158446	0.946978	0.220063
IGFBP5	P24593	3488	15	15	16	15	15	16	54.8	52.6	55.1	0	0	0	-0.514473	-0.129487	-0.0743475	0.00461097	0.103802	0.0335174	0.694612	0.70177	0.735206	1.14816	1.26571	1.38586	1.28971	1.52738	1.54847	0	-0.239436	0.04731	0.710529	1.26658	1.45519
TNC	P24821	3371	76	74	77	3	4	3	43.7	45.4	43.3	0	0	0	-1.7197	-0.52159	-0.724584	-0.916966	-0.0474718	-0.496443	-0.241416	0.527569	0.233658	0.370956	1.39876	1.0222	1.02882	2.08733	1.58791	0	-0.988625	-0.48696	0.17327	0.930639	1.56802
LAMA1	P25391	284217	45	43	38	45	43	38	16.2	15	13.3	0	0	0	-1.19203	-0.795838	-0.812514	-0.414143	-0.49816	-0.560404	0.191103	0.0230448	0.0855058	0.482158	0.577271	0.457518	0.296082	0.438435	0.395928	0	-0.93346	-0.490903	0.0998846	0.505649	0.376815
FAS	P25445	355	3	6	4	3	6	4	9.9	16.4	13.4	0	0	0	-0.660624	-0.289204	-0.521972	-0.327056	-0.6626	-0.603211	0.242751	-0.0852523	-0.269981	0.397001	0.261083	0.306972	0.222702	0.06561	-0.100521	0	-0.4906	-0.530956	-0.0374943	0.321685	0.0625968
COL5A3	P25940	50509	13	12	12	13	12	12	10.8	10.3	9.6	0	0	0	-1.30423	-2.31654	-0.715173	0.588085	-1.31557	0.0536205	1.6657	-0.835602	0.788896	2.00225	-0.134282	1.23776	2.07761	-0.0138918	1.39272	0	-1.44531	-0.224621	0.539665	1.03524	1.15215
FKBP2	P26885	2286	5	5	5	5	5	5	37.3	32.4	24.6	0	0	0	-0.578777	-0.0866094	-0.0327506	-0.559903	-0.618543	-0.564	-0.170402	-0.121053	-0.144232	-0.011674	0.400278	0.186887	-0.287693	0.0430453	-0.000204703	0	-0.232712	-0.580815	-0.145229	0.19183	-0.0816176
AK4	P27144	205	5	5	2	5	5	2	22.4	23.8	9	0	0	0	-1.40474	-1.78623	-0.323073	-1.7184	-1.70899	-1.35219	-0.206494	-0.584641	0.247867	0.387519	0.579901	1.15901	-0.145284	-0.0339828	0.875223	0	-1.17135	-1.59319	-0.181089	0.708811	0.231985
DPP4	P27487	1803	19	20	11	19	20	11	23.4	25.7	15.4	0	0	0	-1.16961	-0.728907	-0.738963	-0.527315	-0.727225	-0.852425	-0.0390511	-0.0729639	-0.212856	0.265605	0.66508	0.286984	0.0850592	0.303419	0.0182254	0	-0.879161	-0.702322	-0.10829	0.40589	0.135568
COL8A1	P27658	1295	3	4	3	3	4	3	4.8	5.8	3.2	0	0	0	-2.10432	-0.457893	-2.18644	-0.752717	0.378595	-1.40396	0.310266	1.27255	-0.577614	0.88639	1.90666	0.253198	1.01984	2.15762	0.460423	0	-1.58288	-0.592695	0.335068	1.01542	1.21263
CALR	P27797	811	20	22	21	20	22	21	50.1	59	57.3	0	0	0	-0.130943	0.165868	0.15233	-0.145051	-0.127898	-0.18802	0.246175	0.225248	0.213599	0.542883	0.810956	0.578414	0.241793	0.561449	0.372552	0	0.0624183	-0.153656	0.228341	0.644084	0.391931
CANX	P27824	821	20	20	23	20	20	23	28.4	31.1	35.6	0	0	0	-0.508497	-0.416344	0.0605999	0.183275	-0.0996975	0.28367	0.807485	0.354485	0.817922	0.974211	1.24121	1.30119	0.825887	0.856987	0.841716	0	-0.28808	0.122416	0.659964	1.1722	0.84153
PSMB6	P28072	5694	5	6	4	5	6	4	20.5	23.4	16.7	0	0	0	-0.135052	0.0484824	0.370279	-0.363799	-0.428045	-0.262424	0.366953	0.102452	0.297374	0.647445	0.659425	0.815925	0.155837	0.15909	0.50116	0	0.0945701	-0.351422	0.255593	0.707598	0.272029
GRN	P28799	2896	18	17	17	18	17	17	38.1	37.9	36.4	0	0	0	-0.945959	-0.487433	-0.408823	-0.48164	-0.368536	-0.409054	0.0150751	0.0256965	0.114111	0.114316	0.312245	0.358456	0.0301804	0.221228	0.369482	0	-0.614072	-0.419743	0.0516276	0.261672	0.206963
CCN2	P29279	1490	18	20	18	18	20	18	63	65	62.8	0	0	0	-1.05661	0.171573	-0.617692	-0.352472	0.817484	-0.317797	0.404064	1.41714	0.346997	0.877475	2.09521	0.973909	1.52893	2.65641	1.77237	0	-0.500911	0.0490717	0.722734	1.31553	1.9859
SERPINB3	P29508	6317	4	5	4	1	2	1	8.5	10.3	8.7		0	0		0.430053	1.45447		-0.893016	2.00891		0.927233	3.48899		2.09391	4.77914		1.56128	4.08659	0	0.94226	0.557947	2.20811	3.43652	2.82394
ERP29	P30040	10961	10	12	12	10	12	12	37.5	41.4	41.4	0	0	0	-0.326699	0.129628	0.391061	-0.00671184	-0.0133179	0.1559	0.454819	0.608946	0.72632	0.873016	1.19807	1.20868	0.503887	0.825224	0.879951	0	0.0646636	0.0452901	0.596695	1.09325	0.736354
PDIA3	P30101	2923	32	32	34	25	25	28	54.3	57.4	59.8	0	0	0	-0.393849	0.0983822	0.109398	-0.136993	-0.127407	-0.137768	0.448165	0.450294	0.421391	0.808942	1.10948	0.896559	0.433075	0.67048	0.550653	0	-0.0620231	-0.134056	0.43995	0.938328	0.551403
LRPAP1	P30533	4043	17	19	17	17	19	17	42.3	44.5	36.1	0	0	0	-1.06608	-0.338106	-0.56307	-1.08311	-0.757177	-1.01717	-0.518834	-0.0875734	-0.361937	-0.0779969	0.599898	0.108248	-0.368847	0.321353	-0.168237	0	-0.655753	-0.952483	-0.322781	0.21005	-0.0719105
ALDH1B1	P30837	219	6	6	6	4	5	4	14.7	16.2	14.7	0	0	0	-2.59692	0.0787011	0.212924	-2.48237	-0.252409	-0.472522	-1.57148	0.272026	0.637361	-1.13474	1.21026	1.0747	-1.80873	0.449475	0.198026	0	-0.768433	-1.0691	-0.220697	0.383405	-0.387077
SFN	P31947	2810	10	8	10	7	6	7	46	37.5	44	0	0	0	-0.110476	0.0615903	0.833402	-0.311156	-0.402163	-0.500526	0.436234	0.187743	0.276592	0.805753	0.826037	0.867046	0.435639	0.50652	0.729328	0	0.261505	-0.404615	0.30019	0.832945	0.557162
L1CAM	P32004	3897	29	27	22	29	27	22	26.5	24.2	19.1	0	0	0	-1.62891	-0.857991	-1.40064	-0.77171	-0.391328	-0.959218	-0.208177	0.0396742	-0.48591	0.0931553	0.556859	-0.0365646	0.121571	0.684396	0.0375375	0	-1.29585	-0.707419	-0.218138	0.204483	0.281168
PYCR1	P32322	5831	2	4	3	2	3	2	11	18.5	15	0	0	0	-2.7729	-0.55912	-0.65453	-2.82061	-1.30256	-1.03057	-0.343065	0.0791411	-0.120162	-0.16862	0.894167	0.62923	-0.270834	0.0705135	-0.0401536	0	-1.32885	-1.71791	-0.128028	0.451592	-0.080158
PHB	P35232	5245	10	11	12	10	11	12	41.9	48.5	51.1	0	0	0	-0.739643	-0.493725	0.18317	-1.4173	-1.94942	-0.668389	0.190188	0.340915	0.424549	0.901086	1.21928	0.991897	0.54049	0.144967	0.574314	0	-0.350066	-1.34504	0.318551	1.03742	0.419923
FBN1	P35555	2200	94	93	93	89	89	89	39.1	40.3	37.7	0	0	0	-1.90782	-1.3744	-1.42092	-1.06362	-0.961516	-1.10304	-0.549787	-0.593524	-0.603012	-0.267597	-0.083251	-0.14622	0.176888	0.350489	0.306708	0	-1.56771	-1.04272	-0.582107	-0.165689	0.278029
FBN2	P35556	2201	80	82	76	74	77	71	34	36	34	0	0	0	-1.17177	-0.54531	-0.593838	-0.27047	-0.117524	-0.278806	0.486593	0.528664	0.440441	0.855444	1.09352	0.987481	0.893025	1.13826	1.0604	0	-0.770305	-0.222266	0.485233	0.978813	1.03056
BSG	P35613	682	10	9	9	10	9	9	27.5	23.9	27.3	0	0	0	-0.416604	-0.136732	-0.295509	-0.399114	-0.362207	-0.711469	-0.141487	0.060161	-0.269224	0.253857	0.713108	0.343038	0.223602	0.406077	-0.038754	0	-0.282948	-0.49093	-0.11685	0.436668	0.196975
TIMP3	P35625	7078	6	5	4	6	5	4	28.4	23.2	17.5	0	0	0	-2.11972	-1.26315	-1.31878	-1.85783	-1.56518	-1.65647	-0.807207	-0.391957	-0.269986	0.0380578	0.490022	0.637433	0.5597	0.492127	0.85156	0	-1.56721	-1.69316	-0.489717	0.388504	0.634462
NUP214	P35658	8021	13	10	14	13	10	14	8.3	5.7	8.1	0	0	0	-0.798339	-0.680193	-0.0984795	-0.969639	-1.04124	-0.586629	-0.0888006	-0.323246	0.173353	0.233772	0.307642	0.626974	-0.262975	-0.323114	0.19089	0	-0.525671	-0.865836	-0.0795645	0.389463	-0.131733
HMGCL	P35914	3155	4	5	3	4	5	3	12.3	16.6	8.9	0	0	0	-1.13436	0.399224	-0.213646	-1.24878	-2.48351	-0.660801	-0.589989	1.34587	-0.0443026	-0.0171644	1.36379	0.385226	-0.716677	0.228386	-0.308761	0	-0.31626	-1.46437	0.237192	0.577285	-0.265684
CHI3L1	P36222	1116	12	11	11	12	11	11	38.6	36.3	36.3	0	0	0	-0.972189	-0.271564	-0.946288	0.336882	0.722621	0.0179423	1.05896	1.4705	0.708256	1.81927	2.61569	1.79979	2.03842	2.73268	2.10417	0	-0.730014	0.359148	1.07924	2.07825	2.29176
NUDT1	P36639	4521	2	2	2	2	2	2	12.7	12.7	12.7	0	0	0	0.332758	0.901209	0.208504	0.0275622	0.552844	-0.487018	0.596361	1.50193	0.496739	1.16615	1.90361	0.837284	0.736563	1.15214	0.261594	0	0.480824	0.0311293	0.865009	1.30235	0.716764
SERPINF1	P36955	5176	16	17	15	10	11	10	43.8	45.7	40	0	0	0	0.682205	0.918978	1.03911	1.40537	1.24622	1.2561	1.80459	1.74974	1.73022	1.94634	2.05757	2.03074	1.68784	1.84742	1.87155	0	0.880098	1.30256	1.76152	2.01155	1.80227
SRP14	P37108	6727	5	4	3	5	4	3	40.4	33.1	22.8	0	0	0	0.22805	0.658335	0.156869	0.00445864	-0.126901	-0.730555	0.575345	0.672816	0.0368477	1.08735	1.29176	0.458193	0.479667	0.735332	-0.0180057	0	0.347751	-0.284332	0.428336	0.945766	0.398998
TAGLN2	P37802	8407	14	15	15	13	14	14	70.4	70.4	70.4	0	0	0	-0.669852	-0.449024	-0.327595	-1.12789	-1.14844	-1.23624	-0.486754	-0.451059	-0.424776	-0.0346265	0.232856	0.151222	-0.565816	-0.257774	-0.229879	0	-0.482157	-1.17086	-0.454196	0.116484	-0.351156
RPL3	P39023	6122	18	19	21	18	19	21	38	42.9	43.9	0	0	0	-0.198751	0.236863	0.280632	-1.08576	-1.01859	-1.04292	-0.222378	-0.115685	-0.149767	0.0193874	0.584015	0.217001	-0.63345	-0.173261	-0.555407	0	0.106248	-1.04909	-0.16261	0.273468	-0.45404
COL18A1	P39060	80781	14	15	14	14	15	14	10.8	10.7	10	0	0	0	-0.786074	-0.62354	-0.322811	0.0459269	-0.203591	0.0342812	1.00339	0.781439	0.852384	1.3229	1.30177	1.42315	0.606018	0.434816	0.739539	0	-0.577475	-0.0411278	0.879069	1.34927	0.593458
WNT5A	P41221	7474	13	11	9	9	9	6	39.7	34.5	27.1	0	0	0	-1.29065	-1.98657	-0.906695	-0.806044	-2.01617	-1.12963	0.231215	-0.675172	-0.0969313	0.715445	-0.111438	0.475758	0.676797	-0.407182	0.2936	0	-1.39464	-1.31728	-0.180296	0.359922	0.187738
GARS	P41250	2617	27	26	27	27	26	27	38.4	38.8	38.3	0	0	0	-0.60922	-0.0616098	-0.243847	-0.932106	-0.572861	-1.03262	-0.308909	-0.107776	-0.331864	0.00659597	0.481748	0.0852214	-0.688333	-0.0659272	-0.511062	0	-0.304892	-0.845862	-0.249516	0.191188	-0.421774
TNFSF9	P41273	8744	1	1	1	1	1	1	3.9	3.9	3.9	0	0	0	2.33967	2.30513	2.51968	2.22475	2.25218	2.36965	3.15113	2.4504	2.99163	3.38696	3.45953	3.40915	3.30108	3.1152	3.1251	0	2.38816	2.28219	2.86438	3.41855	3.18046
EPS15	P42566	2060	21	24	19	21	24	19	28.5	32	24.8	0	0	0	-0.798182	0.167631	0.0115749	-0.980929	-0.338634	-0.669646	-0.344989	0.292254	0.0251298	-0.0206267	0.855015	0.483092	-0.483614	0.306163	0.0545	0	-0.206325	-0.66307	-0.00920192	0.43916	-0.0409839
CDKN2A	P42771	1029	4	3	4	4	3	4	34	26.3	34	0	0	0	0.448834	-0.117172	-1.73532	0.428483	-0.901986	-2.4523	0.915102	-0.0963421	-1.80441	1.32883	0.38119	-1.33509	0.561709	-0.406669	-1.81343	0	-0.467885	-0.975267	-0.328551	0.124975	-0.552798
PRCP	P42785	5547	8	9	7	8	9	7	14.9	17.1	13.5	0	0	0	-0.661539	-0.445466	-0.0176973	-0.399923	-0.572995	-0.251493	0.221648	0.107033	0.423044	0.644401	0.670452	0.910765	0.363725	0.377362	0.658649	0	-0.374901	-0.408137	0.250575	0.741872	0.466579
CXCL5	P42830	6374	4	4	5	3	3	4	36.8	36.8	37.7	0	0	0	-0.446126	-0.214796	-0.118332	-0.204855	-0.492261	-0.52982	1.66026	1.33964	1.03194	2.82802	2.82524	2.47552	2.34764	1.97227	2.07159	0	-0.259751	-0.408979	1.34395	2.70959	2.1305
CTSK	P43235	1513	6	7	7	5	6	6	14.3	21.6	21.9	0	0	0	-0.514606	-0.583309	-0.104486	-0.382757	-0.776519	-0.337617	-0.0091509	-0.474323	-0.0840585	0.0322454	-0.101623	0.190782	0.0322889	-0.156982	0.317882	0	-0.4008	-0.498964	-0.189178	0.0404684	0.0643965
BTD	P43251	686	8	8	5	8	8	5	14.9	14.9	10.9	0	0	0	-2.52263	-0.94365	-0.709108	-1.80575	-0.695545	-0.490378	-1.3152	-0.359908	0.0390007	-1.01324	0.137279	0.465118	-0.738081	0.447888	0.82956	0	-1.3918	-0.997225	-0.545368	-0.136946	0.179789
GPD2	P43304	2820	5	2	5	5	2	5	7.2	2.9	7	0		0	-2.37529		0.526257	-2.37365		-0.696425	-1.08641		0.69097	-0.96182		1.16611	-1.57873		0.0290718	0	-0.924517	-1.53504	-0.19772	0.102143	-0.774827
NAMPT	P43490	10135	21	24	23	21	24	23	42	50.9	47.9	0	0	0	0.168302	0.0700936	-0.110265	0.324308	-0.102738	-0.431344	0.872167	0.727438	0.333539	1.50575	1.41968	1.00445	0.763784	0.820094	0.374077	0	0.0427104	-0.0699248	0.644381	1.30996	0.652652
ARCN1	P48444	372	30	27	26	30	27	26	54	44.4	45.2	0	0	0	-0.451465	-0.207497	-0.145566	-0.615429	-0.760847	-0.784335	0.0978188	0.0182737	-0.0977291	0.47192	0.591666	0.42143	-0.0309788	0.0160208	-0.111833	0	-0.268176	-0.720204	0.00612113	0.495005	-0.0422637
MASP1	P48740	5648	15	15	15	2	2	2	27.3	24.2	25	0	0	0	-1.95559	-0.329875	-0.150806	-0.816118	0.560979	0.503514	-0.139492	0.98598	1.03865	-0.122915	1.28208	1.31388	-0.02344	1.50306	1.48007	0	-0.81209	0.0827916	0.628379	0.824351	0.986564
ADGRE5	P48960	976	6	7	6	6	7	6	8.1	7.9	7.2	0	0	0	-0.461835	0.123587	0.151118	-0.683775	-0.364543	-0.383037	0.0247557	-0.0414259	0.0405218	-0.148498	0.447358	0.26048	-0.466686	-0.252638	-0.355515	0	-0.0623766	-0.477118	0.00795057	0.186446	-0.35828
TUFM	P49411	7284	16	16	15	16	16	15	41.6	42.9	38.3	0	0	0	-0.473286	-0.241456	0.00139319	-1.056	-1.25619	-1.20049	0.241733	0.0213926	0.0314099	0.458659	0.89843	0.504635	-0.050788	0.300765	-0.288772	0	-0.237783	-1.1709	0.0981784	0.620575	-0.0129316
MMP14	P50281	4323	11	11	12	11	11	12	19.4	19.8	25.1	0	0	0	-0.358873	-0.380505	0.605661	0.000454272	-0.303683	0.410668	0.447884	0.345543	0.867078	0.88711	0.781133	1.62156	0.937779	0.794685	1.77919	0	-0.0445722	0.0358132	0.553502	1.0966	1.17055
SERPINH1	P50454	871	23	23	22	23	23	22	62.2	63.6	61.7	0	0	0	-0.819517	-0.131995	-0.564867	-0.186681	-0.0533786	-0.596476	0.587537	0.953027	0.400285	1.18399	1.68928	0.999291	0.787149	1.28241	0.650831	0	-0.50546	-0.278845	0.64695	1.29085	0.906796
HDGF	P51858	3068	25	26	29	24	25	28	79.2	80	88.3	0	0	0	0.436104	1.02226	0.874616	0.207723	0.569664	0.258226	0.603505	0.911188	0.697906	0.935805	1.33679	1.07788	0.347444	0.900939	0.592903	0	0.777659	0.345204	0.737533	1.11683	0.613762
LUM	P51884	4060	15	15	14	10	10	10	49.7	49.7	43.2	0	0	0	-0.900582	-0.700024	-0.458657	0.495804	0.349945	0.487951	1.045	0.728627	0.98992	1.25392	1.14481	1.323	1.42511	1.43466	1.54742	0	-0.686421	0.444566	0.921182	1.24058	1.46906
STC1	P52823	6781	11	9	10	11	9	10	50.2	44.1	47	0	0	0	-0.163788	-1.13431	-0.60513	0.341042	-1.12893	-0.760634	1.42537	0.0361822	0.081448	1.60096	0.0774144	0.586659	0.692543	-0.859561	-0.260867	0	-0.634411	-0.516173	0.514332	0.755012	-0.142628
SUCLG1	P53597	8802	5	3	1	5	3	1	17.1	10.1	2	0	0	0	-1.58799	-0.069871	0.221656	-1.46134	-0.953173	-0.675782	-0.421593	0.194515	0.279482	-0.248978	1.04176	0.872476	-0.632693	0.325653	0.12464	0	-0.478733	-1.0301	0.017468	0.555088	-0.0608001
CTSC	P53634	1075	8	10	10	8	10	10	14.7	22	21.4	0	0	0	-0.691696	-0.295082	-0.868051	-0.268781	-0.299471	-0.991586	0.42853	0.423397	-0.456922	0.881216	1.04079	0.0634836	0.499403	0.535267	-0.188977	0	-0.618276	-0.519946	0.131668	0.661831	0.281898
USP14	P54578	9097	28	30	29	27	29	29	49.6	52.6	51.2	0	0	0	-0.432341	-0.172458	-0.153684	-0.668505	-0.70504	-0.870633	-0.0865767	-0.0365017	-0.196575	0.297142	0.49274	0.256946	-0.303958	-0.0919825	-0.278017	0	-0.252828	-0.74806	-0.106551	0.348943	-0.224653
GALC	P54803	2581	4	4	3	4	4	3	7.7	7.7	5.4	0	0	0	-0.0136711	-1.19918	-0.605222	-0.0131169	-1.46168	-0.749174	1.06111	-0.429518	-0.0492764	1.00224	-0.00179713	0.444957	0.987933	-0.479097	0.287916	0	-0.606026	-0.741322	0.194105	0.481801	0.265584
MFAP2	P55001	4237	4	4	4	4	4	4	25.1	25.1	25.1	0	0	0	-0.343878	0.783559	-0.0124901	-0.0567345	0.857225	-0.0273731	0.511498	1.17079	0.47119	0.667954	1.48222	0.687478	0.624013	1.56808	0.81858	0	0.142397	0.257706	0.717825	0.945883	1.00356
PLTP	P55058	5360	11	12	13	11	12	13	27.6	30.6	31.6	0	0	0	-1.24889	0.306131	-0.0548821	-0.53182	0.762399	0.0928706	0.361691	1.54861	0.928399	0.70294	1.96234	1.34531	0.375172	1.76725	1.24217	0	-0.332547	0.107816	0.946233	1.33686	1.1282
MFAP1	P55081	4236	10	13	13	9	12	12	19.4	27.3	28	0	0	0	0.215736	0.405792	0.475393	0.164551	-0.0620127	-0.0971933	0.730419	0.532082	0.545531	0.973234	1.13141	0.931457	0.566308	0.731067	0.529307	0	0.365641	0.00178176	0.602677	1.01203	0.608894
HADHB	P55084	3032	14	14	13	14	14	13	28.9	28.3	26.4	0	0	0	-0.665233	-0.158663	-0.53232	-1.15621	-1.23215	-1.38898	-0.0351956	0.394715	-0.382972	0.526914	1.15262	0.189409	0.092174	0.235155	-0.45498	0	-0.452072	-1.25911	-0.00781723	0.622982	-0.0425505
LAMB2	P55268	3913	54	52	48	54	52	48	36.5	33.9	31.5	0	0	0	-1.41568	-0.765379	-0.716469	-0.763618	-0.452641	-0.51529	0.143855	0.391596	0.371682	0.688446	1.12963	1.02781	0.613675	1.06582	0.94126	0	-0.965843	-0.577183	0.302378	0.94863	0.873586
OXCT1	P55809	5019	13	11	8	13	11	8	28.5	25.8	19	0	0	0	-0.562828	0.204046	0.413683	-0.731452	-0.531271	-0.285227	0.000780572	0.324482	0.156587	0.136648	0.645902	0.412483	-0.748381	-0.475953	-0.452886	0	0.0183002	-0.515983	0.160617	0.398344	-0.559073
MARS	P56192	4141	23	25	21	23	25	21	32.4	35.1	30.8	0	0	0	-0.696432	-0.390465	-0.137789	-1.10459	-1.07251	-0.996405	-0.134013	-0.25864	-0.167313	0.067257	0.464551	0.28825	-0.356064	0.0592672	-0.226666	0	-0.408229	-1.05783	-0.186655	0.273353	-0.174487
BCAR1	P56945	9564	10	9	8	10	9	8	14.4	13.4	10.8	0	0	0	-1.33642	-0.644506	-0.47237	-1.18971	-0.827734	-0.911339	-0.640275	-0.281655	-0.307719	-0.322646	0.381656	0.125524	-0.720857	0.0997972	-0.0673984	0	-0.817765	-0.976261	-0.409883	0.0615113	-0.229486
ADAMTS12	P58397	81792	9	8	11	9	8	11	7	6.1	8	0	0	0	-3.36788	-2.36114	-0.801391	-2.11733	-1.4435	-0.456049	-1.15188	-0.758486	0.261937	-0.881242	-0.201075	0.843737	-0.8125	0.0552655	1.06351	0	-2.17681	-1.33896	-0.549478	-0.0795267	0.102092
B2M	P61769	567	4	5	5	4	5	5	37.8	43.7	43.7	0	0	0	-0.911954	0.0778831	0.0113367	-0.222912	0.576195	0.255232	0.508063	1.00961	0.553669	0.303685	0.962095	0.948971	0.182661	0.925168	0.716775	0	-0.274245	0.202838	0.690446	0.73825	0.608201
TGFB2	P61812	7042	10	10	8	10	10	8	20.8	20.5	18.1	0	0	0	-2.44047	-0.95137	-0.761024	-0.433456	-0.0158367	0.24165	0.800448	1.16138	1.36881	1.56932	2.08416	2.45707	2.09979	2.48833	2.87531	0	-1.38429	-0.0692144	1.11021	2.03685	2.48781
GNAS	P63092	2778	11	10	11	10	9	10	30.2	27.9	32	0	0	0	-0.844516	-0.319827	-0.379073	-0.689269	-0.873685	-0.887806	-0.122339	-0.153261	-0.257862	0.000469374	0.514399	0.267658	-0.330259	-0.0038853	-0.40688	0	-0.514472	-0.81692	-0.177821	0.260842	-0.247008
ADAM17	P78536	6868	7	6	8	7	6	8	9.8	8	10.4	0	0	0	-1.02788	-0.509081	-0.695374	-0.635681	-0.245569	-0.611964	0.0770756	0.227222	-0.0567966	0.14364	0.719657	0.394538	0.338369	0.707012	0.341201	0	-0.744113	-0.497738	0.0825002	0.419279	0.462194
MXRA7	P84157	439921	4	6	6	2	4	4	23	23.5	23.5	0	0	0	0.0570134	0.184641	0.102551	0.383551	-0.307495	-0.0736373	0.811816	0.291087	0.319846	0.865617	0.850196	0.711105	0.283989	0.671638	0.492866	0	0.114735	0.000806144	0.47425	0.808973	0.482831
FBLN2	P98095	2199	26	25	27	26	25	27	27.7	26.4	28.8	0	0	0	-0.890147	-0.384236	-0.320542	-0.62109	-0.524854	-0.634621	-0.189926	-0.00646328	-0.0902263	0.0625479	0.43485	0.187577	-0.119202	0.237448	0.0578731	0	-0.531642	-0.593522	-0.0955387	0.228325	0.0587063
TFAM	Q00059	7019	5	4	4	5	4	4	17.9	11.8	14.2	0	0	0	-1.06144	-0.27616	0.635344	-1.33222	-0.778855	0.0606538	-0.495584	0.0734017	0.741086	-0.188996	0.39635	1.23058	-0.613627	0.163822	0.809137	0	-0.234084	-0.683473	0.106301	0.479311	0.119777
CTBS	Q01459	1486	8	8	9	8	8	9	26.5	26.5	27.8	0	0	0	-1.43518	-1.20714	-0.72256	-1.12793	-1.14612	-0.748328	-0.370112	-0.728278	-0.204335	-0.0828253	-0.126554	0.35315	-0.270259	-0.339683	0.164656	0	-1.12163	-1.00746	-0.434242	0.0479236	-0.148429
COL7A1	Q02388	1294	44	49	42	44	49	42	21.4	23.1	20.8	0	0	0	-0.0759452	0.0528849	0.183435	0.326049	0.110726	0.165997	0.750586	0.518591	0.435199	1.2202	1.21582	1.0429	1.26554	1.15004	1.18748	0	0.0534584	0.200924	0.568126	1.15964	1.20102
PLOD1	Q02809	5351	31	32	28	31	32	28	48.4	50.8	42.8	0	0	0	-0.911928	-0.63145	-0.419662	-0.219672	-0.435222	-0.304346	0.370373	0.297354	0.375996	0.772664	0.774622	0.83336	0.562673	0.665289	0.68666	0	-0.654347	-0.319747	0.347908	0.793549	0.638207
NUCB1	Q02818	4924	33	31	38	32	31	36	67	62.3	69.4	0	0	0	-0.466811	-0.232399	-0.0675874	0.220574	0.356919	0.120085	0.649168	0.597893	0.539923	0.910351	1.00062	0.925742	0.855463	1.05661	0.979418	0	-0.255599	0.232526	0.595661	0.94557	0.96383
PLAUR	Q03405	5329	3	3	4	3	3	4	13.7	14.6	18.5	0	0	0		-0.795896	-1.19271		-0.875796	-1.16168	-0.437691	-0.520729	-0.794404		0.0580904	-0.291004		-0.0760501	-0.408616	0	0.593079	0.568643	-0.584275	1.47093	1.34505
AKR1C1	Q04828	1645	15	14	12	1	1	1	47.4	43	45.2	0	0	0	-0.0572872	0.275886	0.162296	-0.123552	-0.222295	-0.364653	0.418464	0.43282	0.13822	0.676674	0.951321	0.601397	0.286529	0.414183	0.211028	0	0.126965	-0.236833	0.329834	0.74313	0.303913
COL14A1	Q05707	7373	18	18	13	18	18	13	12	11.4	7.6	0	0	0	-1.62723	-2.65852	-0.926663	-0.760453	-2.13656	-0.782458	-0.103264	-1.40565	0.109625	1.0702	0.0045787	1.18341	1.8741	0.799637	1.99352	0	-1.73747	-1.22649	-0.466429	0.752729	1.55575
C1QBP	Q07021	708	5	4	5	5	4	5	22	22	22	0	0	0	-0.522449	0.602814	0.301578	-0.582839	0.283481	-0.0848379	-0.00913099	0.60244	0.36456	0.310658	1.17151	0.810198	0.0310602	0.845373	0.393236	0	0.127314	-0.128065	0.319289	0.764123	0.423223
COL16A1	Q07092	1307	7	6	6	6	5	6	5.8	4.7	5.4	0	0	0	-0.637565	-0.0722017	0.0665609	-0.364805	0.211749	0.130212	0.197768	0.845048	0.812871	0.588216	1.51101	1.36958	0.610823	1.60089	1.51169	0	-0.214402	-0.00761471	0.618562	1.15627	1.24113
LGALS3BP	Q08380	3959	16	16	17	16	16	17	29.4	36.4	38.6	0	0	0	-0.25938	-0.13991	-0.0193365	0.731018	0.380275	0.509757	1.34585	0.809287	1.01044	1.42991	1.26392	1.46569	1.23569	1.03697	1.2234	0	-0.139542	0.54035	1.05519	1.3865	1.16535
LOXL1	Q08397	4016	11	12	10	11	12	10	24	25.6	23.9	0	0	0	-2.11684	-1.69782	-0.991561	-1.24914	-1.31457	-0.853957	-0.452683	-0.407369	-0.129708	-0.0754778	-0.051222	0.471876	-0.0825316	-0.113907	0.471913	0	-1.60208	-1.13922	-0.32992	0.115059	0.0918247
MFGE8	Q08431	4240	14	16	15	14	16	15	43.4	51.9	46	0	0	0	-0.914248	-0.789577	-0.933654	-0.572427	-0.886572	-1.188	-0.194769	-0.133048	-0.398321	0.486308	0.748738	0.416099	0.421666	0.65868	0.228949	0	-0.87916	-0.882332	-0.242046	0.550381	0.436432
GALNT1	Q10472	2589	1	3	1	1	3	1	1.4	5	1.8	0	0	0	-1.05086	-0.786017	0.702312	-0.4995	-0.53583	0.90025	0.152827	0.00335654	2.10578	0.374652	0.336335	1.81661	0.181716	0.266915	1.88571	0	-0.378189	-0.0450265	0.753987	0.842531	0.778113
FSTL1	Q12841	11167	24	24	26	24	24	26	65.3	62	71.1	0	0	0	-0.790015	-0.474638	-0.392226	0.396999	0.456113	0.275012	1.06347	0.909195	0.925094	1.44379	1.53555	1.48318	1.67962	1.90465	1.8017	0	-0.552293	0.376041	0.965921	1.48751	1.79532
AIMP1	Q12904	9255	15	15	16	15	14	15	62.8	58.3	61.5	0	0	0	-0.831267	-0.414696	-0.0734082	-1.05201	-1.20464	-0.938202	-0.182332	-0.275334	-0.205706	0.0883495	0.393769	0.409804	-0.369189	-0.255714	-0.0681788	0	-0.43979	-1.06495	-0.221124	0.297308	-0.231027
LMAN2	Q12907	10960	8	9	10	8	9	10	25.8	29.5	32.6	0	0	0	-0.84521	-0.914292	-0.767207	-0.363442	-0.834824	-0.707088	0.305112	-0.348385	-0.187877	0.435736	0.269243	0.243179	0.277675	-0.0365075	0.0180437	0	-0.842237	-0.635118	-0.0770502	0.316052	0.0864036
PRDX4	Q13162	10549	13	13	12	11	11	10	54.2	54.2	54.2	0	0	0	-0.526118	-0.715816	-0.239682	-0.353229	-1.0582	-0.63371	0.256125	-0.349019	-0.0584055	0.511231	0.233157	0.409179	0.29687	-0.140419	0.175155	0	-0.493872	-0.681713	-0.0504334	0.384522	0.110536
DNAJC3	Q13217	5611	10	12	15	10	12	15	20.8	26.8	33.1	0	0	0	-0.879641	-0.695856	-0.581947	-0.811593	-0.982653	-1.06933	0.083166	0.120031	-0.246904	0.663319	0.805672	0.529311	0.546214	0.414869	0.298339	0	-0.719148	-0.954527	-0.0145691	0.6661	0.419807
PAPPA	Q13219	5069	25	24	18	25	24	18	19.7	18.6	13.3	0	0	0	-2.85724	-1.74672	-1.45647	-1.84245	-1.36979	-0.946182	-1.04501	-0.688579	-0.196154	-0.109031	0.431667	0.859736	0.679401	1.10442	1.83934	0	-2.02014	-1.38614	-0.643247	0.394124	1.20772
TRIM28	Q13263	10155	23	27	31	23	27	31	34.5	41.3	49.7	0	0	0	-0.176446	-0.203619	0.101012	-0.609752	-0.969345	-0.77842	0.121405	-0.0834362	0.036752	0.466404	0.525622	0.476165	-0.058341	0.0437422	-0.0327921	0	-0.0930175	-0.785839	0.0249069	0.489397	-0.0157969
PTK7	Q13308	5754	27	29	28	21	22	22	29.6	35.8	33.1	0	0	0	-0.627861	-0.332219	-0.337689	-0.079566	-0.167031	-0.31286	0.62074	0.450154	0.314479	0.888242	0.994812	0.7747	0.565383	0.689491	0.532601	0	-0.43259	-0.186486	0.461791	0.885918	0.595825
OS9	Q13438	10956	9	11	10	2	3	2	18.3	20.7	19.6	0	0	0	-0.692151	-0.428405	-0.277955	-0.306491	-0.429813	-0.210166	0.195215	0.0222939	0.213919	0.528747	0.387243	0.64428	0.381609	0.312324	0.636621	0	-0.46617	-0.31549	0.143809	0.52009	0.443518
SEMA5A	Q13591	9037	7	7	8	7	7	8	6.2	6.2	8.8	0	0	0	-0.337839	-0.348356	-0.374316	0.252865	-0.085266	-0.0810865	0.996025	0.498384	0.408291	1.15113	0.94863	0.805837	1.22969	1.00841	0.867865	0	-0.353504	0.0288374	0.634233	0.968533	1.03532
KRR1	Q13601	11103	4	4	4	4	4	4	11.8	11.8	11.8		0	0	-1.85873	0.26189	0.537329	-2.7653	-0.82835	-0.220722	-1.89113	0.410803	0.587016	-1.75623	1.15624	0.871576	-1.9388	0.630753	0.40269	0	-0.35317	-1.27146	-0.29777	0.0905279	-0.301784
PWP1	Q13610	11137	11	10	10	11	10	10	25.3	23.4	24	0	0	0	-0.684128	0.266822	-0.0420781	-0.969733	-0.35756	-0.701087	-0.333857	0.21548	-0.278265	-0.0875656	0.830737	0.224154	-0.529427	0.2295	-0.275859	0	-0.153128	-0.676127	-0.132214	0.322442	-0.191929
SNTB1	Q13884	6641	2	4	2	2	4	2	3.3	10.8	5.6	0	0	0	-0.517845	-0.252202	0.00447987	-0.401867	-0.660473	-0.379855	0.307883	0.393017	0.424322	0.658723	0.907908	0.877542	-0.0351053	0.3669	0.45646	0	-0.255189	-0.480732	0.375074	0.814724	0.262752
IDI1	Q13907	3422	11	12	11	11	12	11	37.9	46.7	37.9	0	0	0	0.557162	0.873082	0.960326	0.757936	0.785703	0.651061	1.29319	1.47868	1.29592	1.69822	1.99069	1.74701	1.09932	1.36725	1.17671	0	0.796856	0.731567	1.35593	1.81197	1.21443
NID2	Q14112	22795	48	49	48	16	17	18	40.9	42.1	41.6	0	0	0	-0.146231	0.308989	0.252759	0.524717	0.544439	0.306998	0.87423	0.772339	0.683124	0.803256	0.973356	0.753918	0.415318	0.613814	0.270573	0	0.138506	0.458718	0.776565	0.84351	0.433235
DAG1	Q14118	1605	22	19	20	22	19	20	29.3	26.5	29.9	0	0	0	-0.756792	-0.35443	-0.56065	-0.17791	-0.210991	-0.502049	0.338418	0.332012	0.0451445	0.557324	0.775637	0.453975	0.400357	0.637135	0.380193	0	-0.557291	-0.296983	0.238525	0.595645	0.472562
MLEC	Q14165	9761	2	4	3	2	4	3	4.8	10.3	7.9		0	0		-0.211524	0.557318		0.0307633	0.160106		0.473678	0.928525		1.50414	1.56075		1.01686	0.953397	0	0.172897	0.0954349	0.701102	1.53245	0.98513
RCN2	Q14257	5955	7	8	8	7	8	8	18.9	24	24.9	0	0	0	-0.448765	0.0624359	0.447178	-0.142331	-0.229046	0.177573	0.466782	0.350402	0.792013	0.890698	1.0739	1.26274	0.512796	0.750274	0.986753	0	0.0202827	-0.0646016	0.536399	1.07578	0.749941
FAT1	Q14517	2195	74	75	70	74	75	70	17.9	18.7	17.4	0	0	0	-0.644897	-0.174644	-0.368012	-0.137444	-0.0275897	-0.283928	0.598282	0.620429	0.388995	0.973578	1.23669	0.948411	0.849164	1.11361	0.861048	0	-0.395851	-0.149654	0.535902	1.05289	0.941275
PDIA5	Q14554	10954	11	6	7	11	6	7	21.6	10.8	13.3	0	0	0	-1.00816	-0.795685	-0.425056	-0.906184	-1.26918	-0.899823	0.0274529	-0.281744	0.016178	0.678512	0.452568	0.62679	0.368919	-0.0027194	0.266122	0	-0.742966	-1.02506	-0.0793709	0.585957	0.210774
SEMA3A	Q14563	10371	3	2	4	3	2	4	4.3	2.6	5.7	0	0	0	-1.62217	-1.08467	-0.527344	-1.15836	-0.828659	-0.44806	-0.464405	-0.0053595	0.261551	-0.206517	0.344625	0.667731	-0.543125	0.194416	0.492254	0	-1.07806	-0.811692	-0.0694043	0.268613	0.0478483
MESD	Q14696	23184	8	9	8	8	9	8	35.5	37.6	34.2	0	0	0	-0.136964	-0.00369143	0.0596037	-0.095721	-0.338206	-0.309401	0.455995	0.285466	0.219517	0.761586	0.720558	0.562606	0.292996	0.363172	0.224674	0	-0.0270173	-0.247776	0.320326	0.681583	0.293614
GANAB	Q14697	23193	31	33	33	7	7	8	36.5	36.3	35.4	0	0	0	-0.58352	0.039273	-0.0362489	-0.48815	-0.321649	-0.42939	0.127075	0.480901	0.230864	0.536829	0.97926	0.595801	0.0624069	0.503897	0.237295	0	-0.193499	-0.413063	0.279613	0.703964	0.267866
LTBP1	Q14766	4052	35	35	37	6	9	8	26.5	25.3	26.3	0	0	0	-1.50501	-1.1201	-0.937262	-0.748107	-0.853027	-0.801675	-0.0188198	-0.268455	-0.191399	0.0603531	0.0570005	0.178895	-0.00400971	-0.0932685	0.107686	0	-1.18746	-0.800937	-0.159558	0.0987495	0.00346916
POSTN	Q15063	10631	37	36	38	0	0	0	54.2	53.9	52.5	0	0	0	-0.80851	-0.782457	-0.908827	-0.184453	-0.524309	-0.776776	0.882436	0.653827	0.385072	1.70612	1.50482	1.14097	1.89774	1.67762	1.34495	0	-0.833265	-0.495179	0.640445	1.45064	1.6401
PDIA6	Q15084	10130	17	16	16	17	16	16	42.3	40.7	36.8	0	0	0	-0.188916	0.0796303	-0.0772763	0.0960723	0.0292119	-0.230213	0.706221	0.760512	0.459366	1.30048	1.44972	1.00489	0.86868	0.966284	0.586954	0	-0.0621875	-0.0349762	0.642033	1.2517	0.807306
PCOLCE	Q15113	5118	18	21	19	18	21	19	50.1	57	52.3	0	0	0	-0.870169	-0.343965	-0.475861	-0.0793769	0.146033	-0.354792	0.393022	0.353336	-0.0510298	0.5255	0.707094	0.330588	0.544038	0.748971	0.30934	0	-0.563332	-0.0960453	0.231776	0.521061	0.534116
QPRT	Q15274	23475	9	10	10	9	10	10	38	40.4	40.4	0	0	0	-1.17323	-0.327525	-0.101362	-0.546166	-0.325365	-0.17435	0.509941	0.799033	0.560412	1.16207	1.50973	1.29651	0.884411	1.0784	1.08426	0	-0.53404	-0.348627	0.623129	1.32277	1.01569
RCN1	Q15293	5954	15	18	14	15	18	14	46.5	52	42	0	0	0	-0.418003	0.0681263	-0.209751	-0.495856	-0.331566	-0.501348	-0.0880435	-0.0118328	-0.129565	0.157548	0.515485	0.207822	-0.0941375	0.31384	-0.0411876	0	-0.186542	-0.442923	-0.0764803	0.293618	0.0595051
TMED2	Q15363	10959	5	2	5	5	2	5	24.4	10.4	21.9	0	0	0	-1.25523	-1.16526	-1.18173	-1.59144	-1.33122	-1.88276	-0.511532	-0.542765	-0.817369	-0.0881248	0.268572	-0.179821	-0.567609	-0.0328834	-0.77326	0	-1.20074	-1.60181	-0.623889	0.000208562	-0.457917
ANGPT1	Q15389	284	8	8	11	8	8	11	17.3	15.9	25.7	0	0	0	-1.35923	-1.12443	-1.61759	-0.210332	-0.400611	-1.01638	0.452125	0.304092	-0.416403	1.02451	1.02472	0.404207	1.31338	1.23138	0.706291	0	-1.36708	-0.542442	0.113271	0.81781	1.08368
TGFBI	Q15582	7045	24	24	24	24	24	24	35.6	35.6	36.2	0	0	0	-1.939	-1.96911	-1.79219	-1.10684	-1.37524	-1.36746	-0.21209	-0.279664	-0.392023	0.424066	0.353274	0.295223	0.63901	0.464825	0.381204	0	-1.9001	-1.28318	-0.294593	0.357521	0.495013
TRIP11	Q15643	9321	11	8	13	11	8	13	5.7	4	6.9	0	0	0	-1.02436	-0.380824	-0.906808	-0.798425	-0.608408	-1.37784	-0.205567	0.0872658	-0.704866	0.140712	0.587102	-0.145603	-0.0203951	0.446076	-0.509678	0	-0.770662	-0.928225	-0.274389	0.19407	-0.0279991
IGFBP7	Q16270	3490	15	17	16	15	17	16	55.7	58.5	56.7	0	0	0	-0.941718	-0.505122	-0.218338	0.0354706	0.0661398	0.370973	0.459037	0.333114	0.831781	0.659705	0.800101	1.25226	0.971507	1.17065	1.55686	0	-0.555059	0.157528	0.541311	0.904021	1.23301
ECM1	Q16610	1893	22	21	23	22	21	23	53.5	49.6	51.9	0	0	0	-1.0379	-0.893744	-0.520428	-0.306372	-0.59483	-0.288971	0.259361	-0.232897	0.123148	0.23724	0.0075292	0.322331	0.126802	-0.10959	0.233653	0	-0.817359	-0.396724	0.0498704	0.189033	0.0836215
QPCT	Q16769	25797	6	7	8	6	7	8	19.4	24.9	26.9	0	0	0	-0.559984	-0.967954	-0.39472	0.437463	-0.546933	-0.0948032	1.27368	0.37356	0.651821	1.67787	1.01551	1.45745	1.89739	1.19544	1.6626	0	-0.640886	-0.068091	0.766354	1.38361	1.58515
DDR2	Q16832	4921	0	1	2	0	1	2	0	1.8	2.8		0	0		-0.46046	-0.995344		-0.758718	-1.503		-0.488173	-0.717987		0.55355	-0.407572		0.188937	-0.6053	0	-0.727902	-1.13086	-0.60308	0.0729891	-0.208181
IAH1	Q2TAA2	285148	7	4	3	6	4	3	39.9	22.6	15.7	0	0	0	-0.754865	-0.637561	-0.276499	-1.18435	-1.34719	-0.997773	-0.194962	-0.0346679	-0.261166	0.168761	0.38548	0.216697	-0.423901	-0.407468	-0.327208	0	-0.556308	-1.17644	-0.163599	0.256979	-0.386192
PRTG	Q2VWP7	283659	4	3	3	4	3	3	3.9	2.6	2.5	0	0	0	1.19375	-0.889803	-0.598663	1.93917	-0.926345	-0.785251	2.60626	-0.307531	0.0532309	2.39923	0.0535566	0.120983	1.41113	-0.737992	-0.547917	0	-0.0982404	0.0758577	0.783987	0.857924	0.04174
P3H1	Q32P28	64175	20	18	20	20	18	20	31.5	27.2	29.1	0	0	0	-1.05006	-0.522831	-0.297521	-0.832437	-0.672949	-0.542806	-0.0893148	0.0930722	0.174327	0.270061	0.727811	0.638307	-0.0713633	0.23759	0.275744	0	-0.623469	-0.682731	0.0593616	0.545393	0.147324
FUT11	Q495W5	170384	2	1	2	2	1	2	4.9	3	4.7	0		0	-2.0987		-0.847606	-1.79334		-0.76335	-0.888966		-0.139414	-0.577109		0.632665	-0.697699		0.428154	0	-1.47315	-1.27835	-0.51419	0.0277777	-0.134773
SVEP1	Q4LDE5	79987	73	75	64	73	75	64	23.7	26.3	21.4	0	0	0	-0.297675	0.196413	-0.0373625	0.53942	0.581499	0.334818	0.994001	0.980434	0.747036	1.20805	1.38605	1.16483	1.28953	1.47612	1.22451	0	-0.046208	0.485246	0.907157	1.25298	1.33005
TMEM119	Q4V9L6	338773	3	3	4	3	3	4	11	11	14.8	0	0	0	-0.503998	0.557676	0.0954264	-0.0663586	0.455414	0.0464551	0.220637	0.591649	0.321427	0.206311	0.970193	0.619672	0.129017	0.70852	0.186586	0	0.0497015	0.14517	0.377905	0.598725	0.341375
FNDC1	Q4ZHG4	84624	1	1	2	1	1	2	0.4	0.4	1.3		0	0		-0.28244	0.0466275		-0.776203	-0.663518		-0.203215	0.134886		0.538409	0.429128		0.370344	0.258963	0	-0.117906	-0.71986	-0.0341643	0.483769	0.314653
BOLA3	Q53S33	388962	1	1	1	1	1	1	6.5	6.5	12.1	0	0	0	0.146144	0.676872	2.42817	-0.200877	0.188246	1.82889	0.492634	0.578538	1.50884	0.371235	1.06701	2.57051	0.0919308	0.584764	2.15783	0	1.08373	0.605419	0.860005	1.33625	0.94484
MIA3	Q5JRA6	375056	9	15	9	9	15	9	5.3	8	5.4	0	0	0	-0.726357	-0.0390343	0.0475499	-0.438283	-0.191385	-0.0360712	0.191834	0.349317	0.506409	0.426014	0.921659	0.961154	0.182666	0.656476	0.735303	0	-0.239281	-0.221913	0.349186	0.769609	0.524815
FHL1	Q5JXI2	2273	12	11	12	2	2	2	54.3	48.1	54.3	0	0	0	-1.21523	-1.18345	-0.743906	-1.1554	-1.22678	-0.950589	-0.0723952	-0.301244	-0.193201	0.251383	0.0431331	0.378058	-0.632001	-0.728272	-0.372011	0	-1.04753	-1.11092	-0.188946	0.224191	-0.577428
FHL1	Q13642	2273	13	11	13	3	2	3	55.3	42.4	55.3	0	0	0	-1.02725	-0.621832	-1.00042	-0.908353	-0.58988	-1.07116	0.169446	0.27838	-0.330803	0.536915	0.828141	0.19562	-0.275706	-0.103898	-0.589788	0	-0.883167	-0.856465	0.0390079	0.520226	-0.323131
EOGT	Q5NDL2	285203	6	4	3	6	4	3	10.8	7	6.1	0	0	0	-0.483335	-0.0809781	-0.3428	-0.257308	-0.340383	-0.729558	0.322983	0.505187	0.0790836	0.805035	0.994198	0.270096	0.313526	0.566045	0.0154401	0	-0.302371	-0.442416	0.302418	0.689776	0.298337
MRPL2	Q5T653	51069	1	2	1	1	2	1	3	5.2	3	0	0		0.455666	-0.156566		-0.159995	-0.960454		1.05429	0.180668		1.22049	1.06428		0.954611	0.484252		0	0.14955	-0.560224	0.617481	1.14239	0.719432
UBAP2	Q5T6F2	55833	13	11	10	13	11	10	12	10.6	10.1	0	0	0	-0.353043	0.382382	0.0698831	-0.413391	0.122538	-0.457529	0.232505	0.519206	0.300069	0.549122	1.15462	0.744936	0.0144177	0.727961	0.185862	0	0.0330742	-0.249461	0.350593	0.816225	0.309413
EGFLAM	Q63HQ2	133584	1	2	0	1	2	0	0.8	2	0	0	0		0.0836511	-3.12061		-0.199444	-3.24643		1.22609	-1.39912		1.9484	-1.49108		1.47001	-1.68866		0	-1.51848	-1.72294	-0.0865169	0.228664	-0.109328
MAP1S	Q66K74	55201	6	5	7	6	5	7	5.1	4.4	7.9	0	0	0	-0.903355	-0.276	-0.781799	-1.20061	-0.780728	-1.63679	-0.591378	-0.277282	-0.769487	-0.0604432	0.47697	-0.299119	-0.496702	0.0839486	-0.647294	0	-0.653718	-1.20604	-0.546049	0.0391359	-0.353349
OLFML2A	Q68BL7	169611	6	11	8	6	11	8	9	16.3	10.9	0	0	0	-0.60712	-0.168809	-0.226052	0.919346	0.818809	0.560703	1.89535	1.6566	1.38362	1.97198	1.98773	1.713	2.212	2.13136	1.8969	0	-0.333994	0.766286	1.64519	1.8909	2.08009
OLFML2B	Q68BL8	25903	5	4	7	5	4	7	7.5	4.3	11.3	0	0	0	-1.30302	-1.14553	-1.07477	-0.646668	-0.673595	-0.890876	0.148976	-0.120847	-0.121976	0.342939	0.281295	0.244488	0.761806	0.511338	0.479822	0	-1.17444	-0.737046	-0.0312824	0.289574	0.584322
INTS3	Q68E01	65123	2	2	1	2	2	1	3.4	3.4	0.7	0	0	0	-1.67412	-1.34314	-0.230666		-1.55974	-1.00987		-0.995132	-0.179619		-0.442719	0.233619		-1.02181	-0.504879	0	-1.08264	0.163057	0.860489	1.34331	0.684519
VWA1	Q6PCB0	64856	5	5	4	5	5	4	13.7	13.7	8.8	0	0	0	0.330007	0.282178	-0.182518	0.746968	0.468298	-0.426134	1.51917	0.979856	0.235398	2.00002	1.61342	0.862182	1.63097	1.40434	0.599967	0	0.143223	0.263044	0.911475	1.49187	1.21176
MOXD1	Q6UVY6	26002	12	14	11	12	14	11	20.4	22.8	20.7	0	0	0	-0.513477	-0.536347	-0.568174	0.0296808	-0.528945	-0.586189	0.521167	0.0481513	-0.0206324	0.702272	0.531075	0.384811	0.512848	0.15198	0.0633576	0	-0.539333	-0.361818	0.182895	0.539386	0.242728
POGLUT2	Q6UW63	79070	6	7	10	6	7	10	13.7	15.9	21.7	0	0	0	-1.50246	0.109674	-0.151228	-1.12767	-0.114562	-0.431494	-0.583839	0.489558	0.31299	-0.156899	1.12778	0.859457	-0.590903	0.581446	0.382226	0	-0.514673	-0.55791	0.072903	0.610113	0.124256
OLFML1	Q6UWY5	283298	2	2	1	2	2	1	7	5	2.7		0	0	-2.38058	-0.852088	0.563124	-0.797104	-0.420132	0.813441	-1.54783	0.229766	1.26567	-1.3691	0.417373	1.40885	-1.82221	0.178938	1.09359	0	-0.889849	-0.134598	-0.0174671	0.152372	-0.183225
B3GNT9	Q6UX72	84752	1	1	1	1	1	1	3.7	3.7	3.7	0	0		-1.28388	-1.16385		-0.53291	-0.66894		-0.0246983	-0.335817		-0.244756	0.213187		-0.0854949	0.0920214		0	-1.22386	-0.600925	-0.180258	-0.0157845	0.00326325
PAMR1	Q6UXH9	25891	15	15	14	1	3	2	22.8	23.2	20.6	0	0	0	-0.927677	-1.2646	-0.553994	-0.322949	-0.988845	-0.4127	0.112479	-0.524489	0.0670236	0.277882	-0.195694	0.381737	0.162901	-0.3056	0.275043	0	-0.915423	-0.574831	-0.114995	0.154641	0.0441147
B3GLCT	Q6Y288	145173	1	1	1	1	1	1	4	4	4			0		1.08638	1.11406		0.544355	1.47004		-0.218875	1.52882		1.36953	2.28367		0.253511	2.11297	0	1.10022	1.0072	0.654975	1.8266	1.18324
CD109	Q6YHK3	135228	33	34	31	33	34	31	24.5	26.9	24.5	0	0	0	-1.20313	-0.768731	-0.602443	-0.488665	-0.441222	-0.392572	0.0566729	0.111878	0.2071	0.15328	0.413793	0.477928	-0.213031	0.0528315	0.120376	0	-0.858101	-0.44082	0.125217	0.348334	-0.0132745
HSDL2	Q6YN16	84263	1	5	2	1	5	2	2.2	10.5	4.3	0	0	0	-0.122112	-0.185576	0.319433	-0.609816	-0.696166	-0.248879	0.680812	0.507538	0.604852	1.05793	1.30635	1.10371	0.599685	0.499339	0.535958	0	0.00391497	-0.518287	0.597734	1.156	0.544994
THSD4	Q6ZMP0	79875	4	2	6	4	2	6	5	2.3	7.3	0	0	0	-1.44328	0.26163	-0.253696	-2.81798	0.374876	-0.667872	-0.879519	0.416083	-0.111968	-0.669095	1.27427	0.116958	-0.61896	0.916788	-0.269296	0	-0.47845	-1.03699	-0.191802	0.240712	0.00951094
MXRA7	Q6ZR64	439921	3	3	3	1	1	1	13.6	13.6	13.6	0	0	0	0.461832	2.00784	0.375192	0.574231	1.8614	0.0255574	0.871296	1.78721	0.434356	1.14091	2.46244	0.690378	0.624339	1.8206	0.0186532	0	0.948288	0.820397	1.03095	1.43124	0.821198
CCDC80	Q76M96	151887	24	25	25	24	25	25	29.2	31.2	31.5	0	0	0	-0.63955	-0.456182	-0.189653	-0.147827	-0.414098	-0.227051	0.284796	0.143313	0.321135	0.766185	0.703833	0.891973	1.19106	1.03457	1.35096	0	-0.428462	-0.262992	0.249748	0.787331	1.1922
KDM3B	Q7LBC6	51780	5	3	4	5	3	4	3.7	2	2.8	0	0	0	-1.22562	-0.993624	-0.468144	-1.05391	-1.26005	-0.870089	-0.217426	-0.538529	-0.0628681	0.112203	0.111864	0.380645	-0.327751	-0.228744	0.173235	0	-0.895796	-1.06135	-0.272941	0.20157	-0.127753
MRPL21	Q7Z2W9	219927	3	3	1	3	3	1	12.2	12.2	3.4	0	0	0	0.0630454	-0.104703	0.618788	-0.557859	-0.713654	0.280165	0.882845	0.20413	1.30853	1.07977	0.937422	1.55175	0.726483	0.428159	0.844526	0	0.192377	-0.330449	0.798503	1.18965	0.666389
MAMDC2	Q7Z304	256691	22	24	22	22	24	22	36.4	36	34.5	0	0	0	-1.05594	-0.43422	-0.65107	-0.160181	0.0894034	-0.251774	0.40929	0.45943	0.263731	0.756607	1.08297	0.847915	1.0619	1.53942	1.15318	0	-0.713742	-0.107517	0.377484	0.895832	1.2515
POGLUT3	Q7Z4H8	143888	5	5	6	5	5	6	9.7	12.4	12.8	0	0	0	-0.989387	-1.21612	-0.0747961	-0.822655	-1.17945	-0.420624	-0.133749	-0.668118	0.242981	0.248503	-0.185179	0.617754	-0.388386	-0.777558	0.110399	0	-0.760102	-0.807575	-0.186296	0.227026	-0.351848
GALNT10	Q86SR1	55568	3	4	5	3	3	4	6.6	9.3	11.9	0	0	0	-1.14517	-0.856954	-0.704002	-0.660078	-0.405136	-0.971345	-0.0745794	0.472627	-0.175026	0.332519	0.650679	0.395469	0.0934312	0.453337	0.159436	0	-0.90204	-0.678853	0.0743404	0.459556	0.235401
BPHL	Q86WA6	670	2	1	2	2	1	2	7.2	2.4	4.8	0	0	0	-1.48577	0.827853	-0.266796	-1.31347	0.333593	-1.29442	-0.25515	1.81698	-0.0331662	0.138549	2.498	0.678857	-0.226637	1.33349	-0.163186	0	-0.308239	-0.758098	0.509554	1.10514	0.314556
LSR	Q86X29	51599	2	3	3	2	3	3	3.3	5.2	5.8		0	0		-0.728058	-1.50036		0.266765	-1.14056		1.02185	-0.310523		2.16903	0.412022		2.50692	0.724222	0	-1.11421	-0.436896	0.355663	1.29053	1.61557
CARM1	Q86X55	10498	13	13	15	12	13	15	28.3	22.5	30.3	0	0	0	-0.423354	-0.184293	-0.269206	-0.757836	-0.966934	-1.09547	-0.050412	-0.198476	-0.488959	0.217023	0.232515	-0.0116064	-0.525537	-0.333034	-0.565382	0	-0.292284	-0.940079	-0.245949	0.145977	-0.474651
NIT1	Q86X76	4817	2	0	2	2	0	2	7.6	0	6.7	0		0	-2.04516		-0.314403	-2.01199		-0.950498	-0.0288265		-0.249517	0.102373		0.288604	-1.22856		-0.340679	0	-1.17978	-1.48125	-0.139172	0.195489	-0.784618
AEBP1	Q8IUX7	165	30	34	29	29	33	28	31.4	33.3	28.3	0	0	0	-1.2763	-0.65714	-0.60953	-0.751931	-0.570965	-0.645239	-0.0579093	-0.0748576	-0.0313035	0.293431	0.494063	0.514784	0.699544	0.851466	0.958239	0	-0.847658	-0.656045	-0.0546901	0.434093	0.836416
P3H3	Q8IVL6	10536	9	9	8	9	9	8	14.3	14.5	12.4	0	0	0	-0.764536	-0.422327	-0.651533	-1.04229	-0.981568	-1.31815	-0.198966	0.203595	-0.387264	0.521268	0.901653	0.218908	-0.0486844	0.282726	-0.387432	0	-0.612799	-1.114	-0.127545	0.547276	-0.0511301
SULF2	Q8IWU5	55959	4	1	5	4	1	5	5.3	1.1	5.5	0	0	0	-1.60288	-0.869858	-0.318058	-1.31277	-0.183378	-0.363603	-0.0252015	0.000468747	0.478432	0.365183	0.43673	1.01404	0.434013	0.302078	1.01364	0	-0.930264	-0.619919	0.151233	0.605318	0.583243
SULF1	Q8IWU6	23213	5	7	8	5	7	8	5.4	7.6	7.2	0	0	0	-0.355446	-0.314567	0.00403398	0.503919	-0.462553	-0.182967	1.32841	0.20378	0.576607	1.67877	0.707145	1.09426	1.35141	0.277675	0.736896	0	-0.221993	-0.0472003	0.702932	1.16006	0.78866
DNAJC10	Q8IXB1	54431	10	10	5	10	10	5	12.1	11.9	6.6	0	0	0	-0.669675	-0.237075	-0.264436	-0.539929	-0.543882	-0.705614	0.153204	0.397825	0.273136	0.741367	0.972618	0.811434	0.346121	0.591034	0.421328	0	-0.390396	-0.596475	0.274721	0.841806	0.452828
RBM12B	Q8IXT5	389677	4	6	4	4	6	4	9.6	11.4	8.8	0	0	0	-0.648955	-0.538512	-0.309524	-0.259883	-0.739784	-0.913496	0.827268	-0.0809305	-0.0970729	1.53224	0.809372	0.579639	1.02812	0.538483	0.00353241	0	-0.498997	-0.637721	0.216422	0.973752	0.523378
CPXM2	Q8N436	119587	13	13	11	12	12	10	20	19.3	17.3	0	0	0	-1.75991	-1.39951	-0.720876	-1.32616	-1.45088	-0.925865	-0.507462	-0.75137	-0.181592	-0.104419	-0.145484	0.31354	-0.185259	-0.196143	0.414487	0	-1.29343	-1.2343	-0.480141	0.0212122	0.0110285
SFRP1	Q8N474	6422	9	9	8	9	9	8	42.7	42.7	35.7	0	0	0	-1.14169	-0.660646	-0.274492	-0.404824	-0.316833	-0.0772772	0.355479	0.443812	0.560353	0.461706	0.742767	0.929456	0.0262855	0.165681	0.44906	0	-0.692275	-0.266311	0.453215	0.71131	0.213675
FSTL5	Q8N475	56884	2	2	1	2	2	1	2.4	2.4	1.7	0		0	-2.70403		-1.56884	-3.55543		-1.22958	-1.37838		0.342822	-1.00261		0.711173	-1.08296		1.53074	0	-2.13643	-2.3925	-0.517779	-0.145717	0.22389
LRRC17	Q8N6Y2	10234	4	4	5	4	4	5	7.9	7.7	9.5	0	0	0	-0.579874	-1.70374	0.682444	-0.144243	-1.26394	0.818161	0.753823	-0.581959	1.77613	1.45444	0.11181	2.24452	1.68331	0.635377	2.72116	0	-0.533722	-0.196674	0.649333	1.27025	1.67995
DRAXIN	Q8NBI3	374946	0	1	1	0	1	1	0	2.6	2.6		0	0		0.0338871	-0.18314		0.505063	-0.02707		1.93208	1.43933		2.9968	2.59384		4.13946	3.64087	0	-0.0746265	0.238996	1.6857	2.79532	3.89016
COLGALT1	Q8NBJ5	79709	18	19	13	18	19	13	30.7	31.2	23	0	0	0	-1.21789	-0.578758	-0.00323474	-1.17374	-1.13059	-0.545996	-0.517973	-0.248076	0.247351	-0.0697194	0.365117	0.652328	-0.459378	-0.0828165	0.239829	0	-0.599961	-0.950106	-0.172899	0.315909	-0.100788
PCSK9	Q8NBP7	255738	18	20	19	18	20	19	30.2	31.5	29	0	0	0	-1.31617	-1.30334	-1.38823	-0.108966	-0.60887	-0.731807	0.884059	0.559721	0.0979831	1.14136	0.998345	0.524239	0.970251	0.679462	0.395025	0	-1.33592	-0.483214	0.513921	0.887983	0.681579
TXNDC5	Q8NBS9	81567	15	15	15	15	15	15	32.2	32.2	34.3	0	0	0	-0.51745	-0.0888183	0.0625168	-0.524896	-0.536797	-0.385553	0.0370063	0.0283962	0.072371	0.294834	0.512097	0.457663	-0.163707	0.0847106	0.0928714	0	-0.181251	-0.482415	0.0459245	0.421531	0.0046249
EHBP1	Q8NDI1	23301	4	4	4	4	4	4	3.9	3.9	3.3	0	0	0	0.171858	-0.334339	-0.761891	-0.157815	-1.11406	-1.0398	0.606979	-0.482412	-0.660779	1.11373	0.0432116	-0.272252	0.423998	-0.563746	-0.53896	0	-0.308124	-0.770558	-0.178737	0.294895	-0.226236
B3GNT7	Q8NFL0	93010	2	3	2	2	3	2	4.5	6.2	4.2	0	0		1.57803	-0.0278499		2.0381	-0.0363627		2.57588	0.69602		3.20921	1.21876		3.47466	1.57144		0	0.775088	1.00087	1.63595	2.21399	2.52305
PLBD2	Q8NHP8	196463	11	10	8	11	10	8	21.1	18.3	14.8	0	0	0	-0.886893	-0.364833	-0.821676	-0.604552	-0.590772	-0.955427	-0.00457615	0.0965537	-0.273977	0.383854	0.663098	0.10846	0.142818	0.63475	-0.109781	0	-0.691134	-0.716917	-0.0606665	0.385137	0.222596
TSKU	Q8WUA8	25987	4	2	3	4	2	3	11.9	6.5	9.1	0	0	0	-1.7211	-0.575613	-0.749338	-1.48031	-1.11142	-0.935619	-0.559742	0.186105	-0.493187	-0.361986	0.77004	0.146168	-0.26889	0.616427	0.06731	0	-1.01535	-1.17578	-0.288941	0.184741	0.138282
SREK1	Q8WXA9	140890	8	6	5	8	6	5	17.9	15.6	9.3	0	0	0	-0.0683885	0.358183	-0.660614	-0.264452	-0.219773	-1.27454	0.453502	0.378888	-0.555965	0.562252	0.937745	-0.157671	0.174332	0.341587	-0.488028	0	-0.123607	-0.586256	0.0921414	0.447442	0.00929707
RTF1	Q92541	23168	12	12	11	12	12	11	17.5	18.2	15.8	0	0	0	-0.566085	-0.26337	-0.408763	-0.559401	-0.790502	-1.11871	0.161693	-0.159087	-0.397579	0.265614	0.311265	-0.0216215	-0.107538	-0.115763	-0.288872	0	-0.41274	-0.82287	-0.131658	0.185086	-0.170724
UBXN4	Q92575	23190	1	4	3	1	4	3	1.8	11.8	7.7		0	0		0.379394	0.521572		0.352308	0.16719		0.80324	0.833103		1.44704	1.37832		1.22549	1.05778	0	0.450483	0.259749	0.818172	1.41268	1.14163
PXDN	Q92626	7837	46	50	49	46	50	49	37.3	43.5	41.3	0	0	0	-0.998561	-1.05538	-0.979671	-0.318631	-0.778288	-0.794695	0.485848	0.194894	0.0682745	0.912512	0.800986	0.7082	1.02122	0.747175	0.709632	0	-1.0112	-0.630538	0.249672	0.807232	0.82601
GGH	Q92820	8836	11	12	10	11	12	10	34.3	37.1	31.4	0	0	0	-0.168502	0.182537	0.0686124	-0.0325781	0.0017947	-0.168208	0.436873	0.5187	0.292562	0.835522	1.0255	0.753935	0.441389	0.694556	0.44207	0	0.0275492	-0.0663305	0.416045	0.871653	0.526005
PCSK5	Q92824	5125	3	3	3	3	3	3	1.5	1.5	1.3	0	0	0	-1.5365	-1.23342	-1.24521	-0.811938	-0.623028	-0.816483	0.0639505	0.158982	-0.426551	0.0792078	0.226944	0.00679975	-0.642184	0.30043	-0.0163757	0	-1.33838	-0.750483	-0.0678729	0.104317	-0.119376
GLG1	Q92896	2734	24	22	24	24	22	24	18.9	17.9	20.5	0	0	0	-0.929824	-0.396932	-0.781309	-0.646726	-0.502014	-0.936327	0.10118	0.100776	-0.352579	0.40641	0.804233	0.232618	0.329618	0.585091	0.0170594	0	-0.702688	-0.695022	-0.0502077	0.481087	0.31059
HLA-C	Q95604		8	9	8	0	0	0	30.1	33.3	31.2	0	0	0	-1.6875	0.369708	-0.501251	-1.39688	-0.21223	-0.850995	-0.588064	0.767178	-0.301643	-0.508841	0.969415	0.160787	-0.435575	1.0192	-0.244665	0	-0.606346	-0.820034	-0.0408433	0.20712	0.112986
SYAP1	Q96A49	94056	5	6	4	5	6	4	23	27	12.5	0	0	0	-0.922036	-0.511907	-0.259078	-1.38804	-0.984897	-1.01619	-0.587752	-0.209046	-0.363219	-0.275706	0.334752	0.237488	-0.862325	-0.225402	-0.210257	0	-0.56434	-1.12971	-0.386672	0.0988447	-0.432662
COL26A1	Q96A83	136227	1	2	1	1	2	1	2.9	7.5	4.5			0			-1.52946	1.76075		-0.572624	2.59053		-0.939412	3.13076		-0.162001	3.67757			0	-1.52946	0.594065	0.825557	1.48438	3.67757
FKBP10	Q96AY3	60681	25	23	25	24	22	24	50.2	43.8	44	0	0	0	-0.804277	-0.302498	-0.524085	-0.768217	-0.673685	-0.974186	-0.122894	-0.0280451	-0.301419	0.219262	0.567657	0.133245	-0.128791	0.211266	-0.219561	0	-0.54362	-0.805363	-0.150786	0.306721	-0.0456952
CTHRC1	Q96CG8	115908	5	5	5	3	3	3	22.6	22.6	22.6	0	0	0	-1.24777	-0.554947	-0.356179	-0.327725	-0.330104	-0.262263	0.189274	0.306538	0.362642	0.435486	0.784874	0.713289	0.86866	1.05699	1.19803	0	-0.719631	-0.306697	0.286151	0.64455	1.04123
RMDN1	Q96DB5	51115	8	6	7	8	6	7	26.8	21.3	20.4	0	0	0	-1.15031	-1.14219	0.0775787	-1.25353	-0.989568	-0.711915	-0.791388	-0.189061	0.191345	-0.334916	-0.133352	0.474917	-0.885319	-0.542676	-0.0761063	0	-0.738309	-0.985005	-0.263035	0.00221633	-0.501367
ERLEC1	Q96DZ1	27248	2	3	5	2	3	5	4.3	8.5	12.6	0	0	0	-0.790523	-0.185732	-0.535293	-0.830441	-0.821065	-1.07513	-0.21231	0.0523834	-0.574061	0.430474	0.761353	0.154641	0.394232	0.33343	-0.0559681	0	-0.503849	-0.90888	-0.244663	0.448823	0.223898
IL17RA	Q96F46	23765	1	1	1	1	1	1	0.9	0.9	0.9		0	0		-0.154803	-0.276035		-0.586713	-0.49927		-0.153377	-0.235458		0.0937322	0.224837		-0.0697193	-0.461114	0	-0.215419	-0.542991	-0.194418	0.159285	-0.265417
PIK3IP1	Q96FE7	113791	3	3	3	3	3	3	12.5	15.6	12.5	0	0	0	-0.963349	-1.28872	-0.369434	-0.643532	-1.47054	-0.610181	-0.202721	-0.783787	-0.0186113	0.305861	-0.651506	0.213628	0.444572	-0.126549	0.940925	0	-0.873835	-0.908083	-0.33504	-0.0440056	0.419649
FAHD2A	Q96GK7	51011	8	8	6	8	8	6	30.6	34.4	22	0	0	0	-1.94074	-0.847088	-1.42843	-1.47793	-1.25271	-1.78599	-0.356004	-0.0721514	-1.03608	-0.00544987	0.564545	-0.42144	-0.692531	-0.285564	-1.07652	0	-1.40542	-1.50554	-0.488079	0.0458851	-0.684871
ERO1A	Q96HE7	30001	13	14	14	13	14	14	33.5	36.1	36.1	0	0	0	-0.750776	0.0760566	-0.0451949	-0.701258	-0.180158	-0.553572	-0.0874914	0.457034	-0.0330054	0.225249	0.986084	0.443144	-0.192629	0.491715	0.0457255	0	-0.239971	-0.478329	0.112179	0.551492	0.114937
SFRP2	Q96HF1	6423	6	7	7	6	7	7	19	29.2	28.8	0	0	0	0.964875	-0.330068	-0.739175	1.87342	0.28636	-0.671525	3.19113	1.74397	0.601527	3.99593	2.5011	1.86421	4.31454	2.80474	2.13855	0	-0.0347891	0.496087	1.84554	2.78708	3.08594
AHCYL2	Q96HN2	23382	7	6	3	1	1	0	12.1	10.5	5.2	0	0		0.610994	0.0411174		0.585338	-0.0736331		0.997101	0.430609		1.26223	1.11802		1.2667	0.803833		0	0.326056	0.255852	0.713855	1.19012	1.03527
PGAM5	Q96HS1	192111	4	4	3	4	4	3	12.5	12.5	9.3	0	0	0	-0.505356	-0.000666792	-1.77833	-0.998925	-1.08477	-2.50105	-0.202879	0.0424295	-1.69862	0.414527	0.896581	-1.04471	-0.183902	0.474221	-1.61335	0	-0.761452	-1.52825	-0.619689	0.0887977	-0.441009
DDRGK1	Q96HY6	65992	4	7	7	4	7	7	16.9	27.4	26.4	0	0	0	0.570613	-0.584972	-0.110621	0.284903	-0.940437	-0.664893	1.0091	-0.515462	-0.173558	1.27045	-0.0749759	0.364171	0.695707	-0.337649	0.0606145	0	-0.04166	-0.440142	0.106694	0.519882	0.139557
BOD1	Q96IK1	91272	3	3	2	2	2	1	14.1	14.1	8.6	0	0	0	-0.647494	-0.420855	0.101946	-0.730754	-0.978911	-0.718119	0.0463475	-0.292239	0.110824	0.483743	0.286345	0.547265	-0.255125	-0.463704	-0.0299744	0	-0.322135	-0.809261	-0.0450227	0.439118	-0.249601
THOC3	Q96J01	84321	4	4	5	4	4	5	9.4	9.4	13.4	0	0	0	-0.769637	-0.220139	-0.0220583	-1.0511	-0.797102	-0.774709	-0.129767	-0.00890039	0.00898419	0.065824	0.632125	0.564214	-0.506648	-0.149416	0.317804	0	-0.337278	-0.874303	-0.0432279	0.420721	-0.112753
LOXL4	Q96JB6	84171	7	7	7	7	7	7	12.7	10.1	10.1	0	0	0	-1.81067	-0.686499	-0.590658	-0.939877	-0.486626	-0.178224	-0.262155	0.0432797	0.325483	-0.148082	0.493417	0.631981	-0.015462	0.409394	0.623095	0	-1.02928	-0.534909	0.0355361	0.325772	0.339009
FAM20A	Q96MK3	54757	2	2	2	1	1	1	4.8	4.8	4.8	0	0	0	-1.93436	-1.55016	-1.01837	-1.18625	-0.294662	-1.23418	0.144097	0.398295	0.0369334	-0.325221	0.793595	0.228704	-0.116637	0.793699	0.228966	0	-1.50096	-0.90503	0.193108	0.232359	0.302009
IPO9	Q96P70	55705	25	25	22	25	25	22	28.2	28.5	24.7	0	0	0	-0.800874	-0.305144	-0.455145	-0.84515	-0.708358	-0.928403	-0.177843	-0.0541592	-0.266813	0.118612	0.380582	0.180166	-0.392153	-0.0476015	-0.250746	0	-0.520388	-0.827303	-0.166271	0.226453	-0.230167
HMCN1	Q96RW7	83872	35	30	30	35	30	30	7.5	6.7	6.5	0	0	0	-2.11722	-1.80342	-2.90632	-1.15602	-1.00818	-2.27639	-0.194304	-0.269332	-1.37171	0.325612	0.600345	-0.694073	0.557706	0.77012	-0.602678	0	-2.27565	-1.4802	-0.611782	0.0772944	0.241716
CPXM1	Q96SM3	56265	12	13	11	12	13	11	23.4	24.3	21.5	0	0	0	-0.398404	-1.87422	-0.0141497	0.615449	-1.37359	0.410561	1.52489	-0.559164	1.26556	1.80539	-0.150775	1.71227	1.46849	-0.451113	1.56516	0	-0.762257	-0.115858	0.743762	1.1223	0.860847
RMDN3	Q96TC7	55177	5	5	6	5	5	6	11.5	11.5	15.1	0	0	0	-0.577698	0.0670805	0.499333	-0.661076	-0.326609	-0.0977788	0.000226144	0.350486	0.504127	0.492251	0.891148	1.08979	-0.0729916	0.517389	0.820132	0	-0.00376125	-0.361821	0.284946	0.824397	0.42151
NAP1L4	Q99733	4676	10	10	12	9	9	10	28.8	30.7	40.3	0	0	0	0.215921	-0.0208061	0.458663	-0.0219063	-0.586359	-0.208464	0.613537	0.00396404	0.41712	0.931604	0.496244	0.867132	0.368872	0.00657069	0.427782	0	0.217926	-0.272243	0.344874	0.764993	0.267741
RARRES2	Q99969	5919	6	6	5	6	6	5	43.6	43.6	26.4	0	0	0	0.244045	1.13986	0.156801	1.77547	2.22135	1.03932	2.42277	2.78647	1.53773	2.59633	3.14855	1.84271	2.58938	3.21496	1.82563	0	0.513569	1.67871	2.24899	2.5292	2.54332
GDF15	Q99988	9518	12	12	11	12	12	11	50.3	50.3	38.3	0	0	0	-0.665119	-0.0837154	0.851944	-0.411367	-0.384168	0.419706	0.529055	0.651047	1.32887	0.911102	1.24904	1.955	0.60891	0.787906	1.66217	0	0.0343699	-0.125276	0.836325	1.37171	1.01966
SOST	Q9BQB4	50964	3	2	2	3	2	2	13.1	9.4	9.4	0	0	0	-2.28437	-1.17866	-1.69408	-1.71456	-1.1422	-2.07121	-0.681065	-0.408006	-1.19722	0.535704	0.587822	0.0989136	0.987129	0.753141	0.31184	0	-1.71904	-1.64265	-0.762097	0.40748	0.684037
CLSTN3	Q9BQT9	9746	3	6	4	3	6	4	3.3	7	4.7	0	0	0	-1.83141	-1.56556	-0.341406	-1.4956	-1.59393	-0.681382	-0.314253	-0.892985	0.174922	0.127896	-0.198258	0.880852	-0.0909627	-0.351935	0.643208	0	-1.24612	-1.25697	-0.344105	0.270163	0.0667699
SDF4	Q9BRK5	51150	17	16	14	17	16	14	44.2	43.9	38.1	0	0	0	-0.794125	-0.401092	-0.196333	-0.321163	-0.338555	-0.195708	0.130923	0.0411898	0.271937	0.304088	0.466869	0.579549	0.341706	0.551365	0.69118	0	-0.46385	-0.285142	0.148017	0.450169	0.528084
PRXL2A	Q9BRX8	84293	0	2	3	0	2	3	0	8.7	13.1		0	0		-1.51075	-0.543047		-1.4854	-0.931562		-0.233757	0.719417		0.539474	1.43872		0.494593	1.29562	0	-1.0269	-1.20848	0.24283	0.989097	0.895104
ERP44	Q9BS26	23071	13	15	16	13	15	16	34	43.6	45.3	0	0	0	-0.414517	-0.266935	-0.166993	-0.476828	-0.67798	-0.72665	0.195003	0.0161762	-0.0899699	0.558517	0.556425	0.39486	0.162174	0.192712	0.00860637	0	-0.282815	-0.627153	0.0404033	0.503267	0.121164
TACO1	Q9BSH4	51204	2	2	2	2	2	2	6.4	6.4	6.4		0	0		1.15938	0.230338		0.658815	-0.587093		1.25454	0.374387		1.70965	0.607713		1.58995	0.409721	0	0.694857	0.035861	0.814465	1.15868	0.999834
CNPY3	Q9BT09	10695	4	7	5	4	7	5	17.3	26.6	24.1	0	0	0	-0.750114	-0.282224	0.00306711	-0.239767	-0.588812	-0.0202228	0.475411	0.351976	0.647423	0.844685	0.665592	1.12272	0.531694	0.457858	0.832509	0	-0.34309	-0.282934	0.491603	0.877665	0.607354
CHRDL1	Q9BU40	91851	3	2	2	3	2	2	6	3.8	3.8	0	0	0	-3.13735	-1.17033	-0.440694	-2.02227	-0.210112	0.571923	-0.959401	0.712871	1.16237	-1.07582	0.467977	1.26873	-1.3101	0.213323	0.880628	0	-1.58279	-0.553486	0.30528	0.220298	-0.0720491
SPON2	Q9BUD6	10417	8	8	7	8	8	7	26.3	26.3	23.3	0	0	0	-1.23984	-0.105616	-0.397178	-0.51254	-0.0242733	-0.353758	0.299825	0.843797	0.353365	0.771377	1.57037	1.02943	1.22937	1.86397	1.43321	0	-0.580879	-0.296857	0.498996	1.12373	1.50885
NUP85	Q9BW27	79902	3	2	3	3	2	3	5.2	4	4.7	0	0	0	-0.524174	0.125244	-0.657052	-0.391516	-0.880827	-1.25179	0.236622	0.16593	-0.34562	0.962516	1.34934	-0.171836	0.0900527	0.612536	-0.6212	0	-0.351994	-0.841378	0.0189776	0.713339	0.0271298
NUDT9	Q9BW91	53343	8	8	7	8	8	7	24.9	25.1	22.9	0	0	0	-0.65515	-0.314066	-0.0557467	-0.694587	-0.861694	-0.58871	-0.0610538	-0.256077	-0.0651976	0.0169757	0.195594	0.324308	-0.210881	-0.101882	0.0207424	0	-0.341654	-0.714997	-0.127443	0.178959	-0.0973402
CHID1	Q9BWS9	66005	10	9	8	10	9	8	27.5	26.5	23.4	0	0	0	-1.01049	-0.447595	-0.798217	-0.696951	-0.559834	-1.02795	-0.00160751	0.271951	-0.187919	0.472889	0.282546	-0.183067	0.242935	0.651498	0.0482426	0	-0.7521	-0.76158	0.0274748	0.190789	0.314226
C1QTNF6	Q9BXI9	114904	1	3	2	1	3	2	4.3	12.9	7.2	0	0	0	-3.17878	-0.041284	0.343861	-3.62878	-0.420414	0.00556057	-2.34754	0.28691	0.680861		1.16956	1.37161	-2.89547	0.763522	1.03905	0	-0.958733	-1.34788	-0.459923	1.8834	-0.364299
EMILIN2	Q9BXX0	84034	20	17	17	20	17	17	21.1	17.4	19	0	0	0	-1.31543	-0.807388	-0.653971	-0.772143	-0.720181	-0.723462	-0.205939	-0.284315	-0.141607	-0.181208	0.108707	0.0792889	-0.360741	-0.0876095	-0.221105	0	-0.925597	-0.738595	-0.21062	0.0022626	-0.223152
C20orf27	Q9GZN8	54976	5	4	3	5	4	3	35.6	35.6	16.7	0	0	0	-0.734533	-1.2461	-0.17681	-0.810984	-2.20124	-0.935357	-0.0994778	-0.82703	-0.106474	0.0647707	-0.162286	0.300572	-0.458269	-0.641575	-0.302811	0	-0.719149	-1.31586	-0.344327	0.0676856	-0.467552
PDGFD	Q9GZP0	80310	2	2	2	2	2	2	6.8	6.8	6.8	0			-0.529544		-1.01946	0.560738		-1.13982	0.817717		-0.448351	1.19281		0.105937	0.710056		0.115102	0	-0.774501	-0.289543	0.184683	0.649372	0.412579
TWSG1	Q9GZX9	57045	4	4	4	4	4	4	24.2	24.2	24.2	0	0	0	-0.455936	-0.081517	-0.207649	0.0185224	0.0255241	-0.102271	0.689352	0.437018	0.428337	0.869598	0.839923	0.768416	0.572246	0.741596	0.695523	0	-0.248368	-0.0194083	0.518236	0.825979	0.669788
SIL1	Q9H173	64374	9	10	9	9	10	9	18.7	20.8	18.4	0	0	0	-0.897291	-1.13243	-0.893674	-0.560049	-1.18271	-1.05666	0.148857	-0.540899	-0.405937	0.461753	0.0319012	0.0673427	0.474846	-0.0597541	0.131813	0	-0.974465	-0.933139	-0.265993	0.186999	0.182302
BOLA2	Q9H3K6	552900	6	6	5	6	6	5	80.2	80.2	69.8	0	0	0	-0.658366	-0.0179859	0.113844	-0.884414	-0.590467	-0.59841	-0.235715	0.0838216	0.0522844	0.065135	0.625935	0.533997	-0.420418	0.131161	0.133408	0	-0.187502	-0.691097	-0.0332032	0.408356	-0.0519498
C1orf198	Q9H425	84886	3	5	5	3	5	5	9.5	17.1	17.1	0	0	0	-0.59484	-1.51088	-0.258207	-0.566166	-1.61937	-0.487246	0.214303	-1.03786	0.21785	0.294561	-0.649461	0.518578	0.21844	-1.09374	0.0959326	0	-0.787977	-0.890928	-0.201903	0.0545594	-0.25979
CUEDC2	Q9H467	79004	1	1	2	1	1	2	3.1	4.9	8			0			0.164922			-0.419572		-6.73906	0.172291			0.554591			0.311287	0	0.164922	-0.419572	-3.28338	0.554591	0.311287
RNPEP	Q9H4A4	6051	21	23	20	21	23	20	35.8	39.1	34.8	0	0	0	-0.572996	-0.144086	-0.101025	-0.53485	-0.584713	-0.579581	0.0551529	0.0205296	-0.0297888	0.325661	0.509809	0.430476	-0.202134	0.014143	0.0014365	0	-0.272702	-0.566382	0.0152979	0.421982	-0.0621847
CDCP1	Q9H5V8	64866	6	8	8	6	8	8	8.4	10.9	11.4	0	0	0	-1.13632	-1.18518	-1.18186	-0.396155	-1.02266	-0.800429	0.0257922	-0.29954	-0.39649	0.243297	0.306883	0.325065	0.140684	0.0315347	0.018552	0	-1.16779	-0.739748	-0.223412	0.291748	0.0635901
CCDC134	Q9H6E4	79879	2	0	1	2	0	1	13.5	0	8.3	0		0	-1.44268		0.0770307	-1.5294		0.191002	-1.45382		0.59316	-0.613032		1.5004	-1.29889		1.43215	0	-0.682825	-0.669197	-0.430328	0.443686	0.0666324
ANTXR1	Q9H6X2	84168	6	6	4	6	6	4	10.8	10.8	8.2	0	0	0	-1.57962	-1.13722	-0.876027	-0.825805	-0.878774	-0.556185	-0.0817173	-0.229538	0.0337034	0.412373	0.344473	0.679853	0.947783	0.862836	1.1335	0	-1.19762	-0.753588	-0.0925174	0.4789	0.981374
VPS37B	Q9H9H4	79720	6	5	5	6	5	5	32.3	28.4	28.8	0	0	0	-1.19275	-0.502004	-0.2928	-0.857889	-1.19864	-0.909365	-0.0473745	-0.169921	-0.313634	0.150413	0.443756	0.470022	-0.265142	-0.0582188	0.0169219	0	-0.662517	-0.988631	-0.176977	0.354731	-0.102146
SIAE	Q9HAT2	54414	2	2	1	2	2	1	3.3	3.3	1.9	0	0	0	-0.447845	0.00298628	-1.0891	-0.349328	0.0449217	-1.46592	0.544959	0.714719	-1.1556	0.972776	1.45402	-0.261474	0.649876	1.0729	-0.578819	0	-0.51132	-0.590108	0.0346932	0.721774	0.381318
NTN4	Q9HB63	59277	7	6	5	7	6	5	12.4	10	8.4	0	0	0	-0.735146	-0.525865	-0.319969	-0.525941	-0.111876	-0.0080928	0.363337	0.501301	0.639019	0.618784	1.17439	1.00859	0.176346	0.558338	0.572325	0	-0.526993	-0.215303	0.501219	0.933921	0.43567
WFDC1	Q9HC57	58189	2	2	3	2	2	3	7.7	8.6	12.7	0		0	-1.33054		-0.0660049	-0.236642		0.646818	0.516486		1.1697	0.666973		1.52701	0.764074		1.80246	0	-0.698274	0.205088	0.843092	1.09699	1.28327
GPN1	Q9HCN4	11321	3	2	1	3	2	1	9.4	5.1	2.1	0	0	0	-0.618437	-0.103829	0.171285	-1.00489	-0.83803	-0.56062	-0.244086	0.0708089	0.101866	-0.0059322	0.223307	0.243887	-0.648127	-0.331564	-0.197465	0	-0.18366	-0.801178	-0.0238039	0.153754	-0.392385
SDF2L1	Q9HCN8	23753	3	2	1	3	2	1	12.7	6.8	5.9	0	0	0	-0.802184	-0.0941713	0.176448	-0.722986	-0.782583	-0.501972	0.136075	0.109672	0.127403	0.385234	0.919145	0.479061	-0.165795	0.00980625	-0.12845	0	-0.239969	-0.66918	0.124383	0.59448	-0.0948128
TNFRSF12A	Q9NP84	51330	3	1	2	3	1	2	29.5	7.8	14	0	0	0	-1.04647	-0.344415	-0.627561	-0.372047	-0.208973	-0.504835	0.255497	0.402851	0.259887	0.629521	0.809988	0.828185	0.879394	1.33095	1.21086	0	-0.672814	-0.361951	0.306079	0.755898	1.1404
CD320	Q9NPF0	51293	3	3	0	3	3	0	13.1	11.7	0	0	0		-0.457261	-0.455544		-0.556144	-0.919428		-0.0419991	-0.300055		0.217339	0.27929		-0.258925	-0.399067		0	-0.456402	-0.737786	-0.171027	0.248314	-0.328996
NECTIN3	Q9NQS3	25945	2	2	2	2	2	2	3.5	3.6	3.6	0	0	0	-1.28395	-0.536331	-0.891948	-0.742442	-0.393848	-0.654869	-0.0285666	0.243169	0.139227	0.351663	0.802057	0.621224	-0.0387997	0.472941	0.415315	0	-0.904075	-0.597053	0.117943	0.591648	0.283152
STARD7	Q9NQZ5	56910	1	2	2	1	2	2	2.2	6.2	6.2	0	0	0	-0.416153	-0.464865	-0.1005	-1.23505	-0.937174	-0.520476	0.277263	-0.026761	0.0487733	0.24039	0.248925	0.183263	-0.101919	-0.345794	0.128659	0	-0.327173	-0.897565	0.0997585	0.224193	-0.106352
BIRC6	Q9NR09	57448	7	6	7	7	6	7	1.7	1.3	1.6	0	0	0	-0.891388	0.194629	-0.827659	-0.883059	-0.0408966	-1.17369	-0.191174	0.47844	-0.570951	0.0126772	1.13765	-0.0804508	-0.54958	0.694699	-0.807463	0	-0.508139	-0.699217	-0.0945616	0.356624	-0.220781
MXRA5	Q9NR99	25878	48	53	53	48	53	53	20.2	22	22.3	0	0	0	-0.827593	-0.438492	-0.345738	0.249748	0.3212	0.175554	0.877921	0.959217	0.898115	1.24496	1.47577	1.39336	1.36184	1.59571	1.49368	0	-0.537274	0.248834	0.911751	1.37136	1.48375
OLFML3	Q9NRN5	56944	21	18	19	21	18	19	51.2	47.8	45.6	0	0	0	0.338656	0.670844	0.868501	0.735348	0.696857	0.652439	1.28534	1.46029	1.34713	1.75974	2.03351	1.98143	1.61184	1.87778	1.72743	0	0.626	0.694881	1.36425	1.92489	1.73902
ECHDC1	Q9NTX5	55862	9	10	9	9	10	9	37.8	42.3	35.8	0	0	0	0.220273	0.198671	-0.00971969	-0.42484	-0.665128	-0.723064	0.620106	0.709451	0.165067	0.962656	1.19137	0.586183	0.388403	0.267103	-0.0585018	0	0.136408	-0.604344	0.498208	0.913404	0.199001
RBM12	Q9NTZ6	10137	11	11	15	11	11	15	13.7	13.5	19.3	0	0	0	-0.577443	-0.0236775	-0.138732	-0.479184	-0.512161	-0.843067	0.276783	0.28913	-0.0392135	0.575233	0.80824	0.449233	0.0866944	0.307215	0.0477497	0	-0.246618	-0.611471	0.175567	0.610902	0.14722
ABHD10	Q9NUJ1	55347	4	4	5	4	4	5	18	18	20.6	0	0	0	-0.0252275	-0.287462	0.208324	-0.518973	-0.995747	-0.439934	0.232933	0.159392	0.290747	1.07289	0.590138	0.783485	0.105034	-0.184711	0.114426	0	-0.0347882	-0.651551	0.227691	0.815503	0.0115831
RBM28	Q9NW13	55131	7	8	6	7	8	6	10.7	11.5	8.4	0	0	0	-1.1674	0.192005	0.573551	-1.34074	-0.353486	-0.088145	-0.403723	0.437242	0.816769	-0.275956	1.11855	1.31864	-0.251348	0.743945	0.766102	0	-0.133948	-0.594123	0.28343	0.720412	0.419566
SLTM	Q9NWH9	79811	15	17	16	15	17	16	15	17.7	15.8	0	0	0	0.450674	0.687475	0.0337409	0.399564	0.319798	-0.290859	1.10049	0.879164	0.233025	1.3434	1.49354	0.806246	1.04009	1.2958	0.580297	0	0.39063	0.142835	0.73756	1.2144	0.972061
FKBP14	Q9NWM8	55033	3	3	3	3	3	3	15.6	18	18	0	0	0	-0.41609	-1.21137	-0.19179	-0.395819	-1.61006	-0.655572	0.24216	-0.998912	0.30289	0.671309	-0.202322	0.489338	0.514149	-0.465458	0.289572	0	-0.606418	-0.887151	-0.151287	0.319442	0.112754
ADPRHL2	Q9NX46	54936	9	8	8	9	8	8	32.2	27.5	27.5	0	0	0	-0.413558	-0.161122	-0.370007	-0.770669	-0.73669	-1.12022	0.0489446	-0.00652676	-0.460502	0.276594	0.441028	0.0371703	-0.251268	-0.204634	-0.456146	0	-0.314896	-0.875861	-0.139361	0.251597	-0.304016
IMPAD1	Q9NX62	54928	5	4	5	5	4	5	10	7.8	11.1	0	0	0	-0.484946	-0.94366	-0.892296	-0.595682	-1.8266	-1.36975	0.270897	-0.327949	-0.634295	0.364819	-0.143358	-0.0934593	0.249174	-0.508275	-0.4331	0	-0.773634	-1.26401	-0.230449	0.0426674	-0.230734
UGGT1	Q9NYU2	56886	27	27	29	25	25	27	17.6	17.8	18.8	0	0	0	-0.789944	-0.214741	-0.238145	-0.595831	-0.398378	-0.504646	0.150829	0.382814	0.216637	0.549243	0.955406	0.710194	0.213983	0.482127	0.312411	0	-0.414276	-0.499619	0.250093	0.738281	0.336174
C1RL	Q9NZP8	51279	2	2	3	1	1	2	3.5	4.7	5.1	0		0	-0.22977		-0.910433	-0.467176		-1.12297	0.505731		-0.675225	0.485697		0.0104485	0.449168		0.102788	0	-0.570101	-0.795071	-0.0847468	0.248073	0.275978
NTM	Q9P121	50863	7	7	7	3	4	4	22.4	18.9	20.9	0	0	0	-1.18089	-0.856405	-0.731009	-0.0194197	-0.0790993	0.0211023	0.83524	0.679503	0.771441	1.17045	1.27634	1.35597	1.39035	1.52189	1.61187	0	-0.922767	-0.0258056	0.762061	1.26759	1.50804
DNAJB9	Q9UBS3	4189	3	3	2	3	3	2	17	14.3	10.8	0	0	0	-1.5958	-1.35098	-0.900501	-1.04712	-1.38949	-0.934066	-0.539636	-0.622807	-0.368322	-0.0463677	0.136474	0.24777	-0.0491068	-0.063281	-0.0215396	0	-1.28243	-1.12356	-0.510255	0.112625	-0.0446424
DNAJB11	Q9UBS4	51726	15	15	12	15	15	12	39.9	39.9	34.6	0	0	0	-0.469191	-0.194712	0.181255	-0.441608	-0.659225	-0.299525	0.300709	0.19048	0.466764	0.696633	0.813217	0.968648	0.417259	0.459205	0.733073	0	-0.160883	-0.466786	0.319317	0.826166	0.536512
CFDP1	Q9UEE9	10428	5	8	6	5	8	6	18.4	26.8	24.7	0	0	0	0.163052	0.426027	0.701925	0.0235093	-0.0464005	0.115399	0.602564	0.535462	0.726918	0.927842	1.08322	1.21542	0.33498	0.72956	0.78515	0	0.430335	0.0308359	0.621648	1.07549	0.616564
NIPSNAP3A	Q9UFN0	25934	4	3	2	4	3	2	21.9	12.6	6.9	0	0	0	-0.549727	0.819227	0.540396	-0.813315	0.304785	-0.0496801	-0.372839	0.574926	0.35943	-0.0123527	1.08511	0.940477	-0.296391	0.82435	0.57168	0	0.269966	-0.18607	0.187173	0.671077	0.366546
IL19	Q9UHD0	29949	3	4	4	3	4	4	19.2	26.6	26.6	0	0	0	-0.961033	0.435842	-0.139251	0.0246627	0.982454	0.211338	1.18962	1.84959	0.920157	1.31457	2.21583	1.48212	0.48339	1.72185	1.04302	0	-0.221481	0.406152	1.31979	1.67084	1.08275
PCYOX1	Q9UHG3	51449	6	5	7	6	5	7	14.3	12.3	16	0	0	0	-1.36917	-0.639357	-0.949884	-1.50128	-1.07573	-1.53408	-0.755314	-0.482175	-0.736129	-0.321638	0.488957	-0.103488	-0.484409	0.292729	-0.442696	0	-0.986137	-1.37037	-0.657873	0.021277	-0.211458
DPP7	Q9UHL4	29952	7	9	8	7	9	8	16.5	21.3	18.7	0	0	0	-0.766386	-0.177711	-0.672204	-0.598366	-0.479713	-1.13788	-0.0627569	-0.00203093	-0.612886	0.232802	0.609194	-0.126235	-0.150351	0.120299	-0.533544	0	-0.538767	-0.738653	-0.225891	0.238587	-0.187865
CPA4	Q9UI42	51200	4	5	4	4	5	4	9.7	12.8	9.7	0	0	0	-1.85953	-1.3357	-1.43374	-0.0195279	-0.0541829	-0.0669344	0.0425491	0.0871418	-0.119987	-0.438429	-0.0542433	-0.262406	-0.60378	-0.147411	-0.481596	0	-1.54299	-0.0468817	0.00323449	-0.251693	-0.410929
CDC23	Q9UJX2	8697	3	2	2	3	2	2	4.9	3.4	3.4		0	0		-0.255148	-0.432137		-1.20168	-0.988426		-0.119228	-0.417423		0.372593	0.175426		-0.275135	-0.332267	0	-0.343642	-1.09505	-0.268325	0.27401	-0.303701
GGA2	Q9UJY4	23062	3	2	3	3	2	3	7.3	4.6	7.3	0	0	0	-0.83446	-0.523931	-1.17212	-1.19611	-0.464722	-0.235097	0.138989	0.265401	0.991015	0.892366	1.05503	1.40823	0.190385	0.196231	1.4308	0	-0.843503	-0.631977	0.465135	1.11854	0.605806
STOML2	Q9UJZ1	30968	7	8	8	7	8	8	24.4	28.4	28.7	0	0	0	-0.739416	-0.051023	-0.0476646	-1.41586	-0.838686	-0.921076	-0.390284	0.32999	0.0472322	0.151962	0.995576	0.510755	-0.304287	0.489103	0.240415	0	-0.279368	-1.05854	-0.00435399	0.552764	0.141744
RCOR1	Q9UKL0	23186	8	7	7	7	7	7	16.9	18.6	18.6	0	0	0	-0.52415	-0.235309	0.0013363	-0.692926	-0.892622	-0.638137	0.153507	0.0487319	0.204671	0.571968	0.651336	0.75352	-0.0064349	0.2658	0.292899	0	-0.252708	-0.741228	0.135637	0.658941	0.184088
ADAMTS7	Q9UKP4	11173	4	3	3	4	3	3	2.9	2.1	2.3	0	0	0	0.288358	-1.17845	0.0744001	0.571323	-0.345581	-2.43556	1.14625	-0.127974	-1.19466	1.27019	0.692048	-0.13507	1.71739	0.953083	-1.78961	0	-0.271898	-0.736605	-0.0587958	0.609055	0.293623
SLC39A10	Q9ULF5	57181	3	4	3	3	4	3	4.2	5.4	4.2	0	0	0	-0.346213	0.237857	-0.691281	-0.646401	-0.338491	-1.23588	0.158038	0.239324	-0.601853	0.318803	0.887341	-0.108768	0.0277765	0.458216	-0.295436	0	-0.266546	-0.740256	-0.0681636	0.365792	0.0635188
NENF	Q9UMX5	29937	6	5	4	6	5	4	37.2	32	26.7	0	0	0	-0.567662	0.020993	-0.128065	-0.43257	-0.273673	-0.499898	-0.0566167	0.0261156	-0.205202	0.175148	0.463137	0.0995416	-0.267158	-0.0537992	-0.309234	0	-0.224911	-0.402047	-0.0785676	0.245942	-0.210064
ADAMTS5	Q9UNA0	11096	1	2	1	1	2	1	1.6	3.9	1.6	0	0	0	-1.75365	-0.914526	-0.727581	-1.31736	-1.13668	-0.803271	-0.834084	-0.186527	-0.330291	0.0400146	0.0702317	0.465748	0.365681	0.665448	0.410368	0	-1.13192	-1.08577	-0.4503	0.191998	0.480499
MINPP1	Q9UNW1	9562	9	9	7	9	9	7	20.1	20.1	17	0	0	0	-1.05317	-0.862003	-0.74803	-0.589941	-0.784216	-0.874727	0.00832222	-0.0926722	-0.165255	0.413675	0.277607	0.105091	0.25217	0.283853	0.0638152	0	-0.887734	-0.749628	-0.0832017	0.265458	0.199946
POFUT2	Q9Y2G5	23275	11	8	8	6	5	5	27.7	21.4	20	0	0	0	-1.10505	-0.681637	-0.707386	-1.18872	-0.952089	-1.18889	-0.550864	-0.237553	-0.431246	0.0782435	0.398671	0.0834209	-0.402936	0.177739	-0.167689	0	-0.831358	-1.1099	-0.406554	0.186779	-0.130962
MRPS28	Q9Y2Q9	28957	3	3	3	2	2	3	13.9	13.9	12.8	0	0	0	-0.630707	-0.106152	0.228693	-0.776419	-1.12382	-0.728749	0.180557	0.320972	0.351724	0.267645	0.869922	0.896334	-0.144072	0.114685	0.36608	0	-0.169389	-0.876329	0.284417	0.677967	0.112231
TSC22D4	Q9Y3Q8	81628	3	4	2	2	3	1	11.6	15.4	4.6		0	0		0.699381	0.241781		-0.0722637	-0.490093		0.816517	0.393498		1.50557	1.01501		0.792271	0.486249	0	0.470581	-0.281178	0.605008	1.26029	0.63926
LOXL2	Q9Y4K0	4017	23	20	21	18	14	15	29.8	26.9	28.6	0	0	0	-1.72487	-1.19689	-1.27424	-0.974962	-0.782569	-1.02159	-0.360291	-0.290754	-0.454372	0.0993359	0.421699	0.190997	0.568824	0.795516	0.571768	0	-1.39867	-0.926373	-0.368472	0.237344	0.64537
HYOU1	Q9Y4L1	10525	33	34	31	32	33	30	34	35.9	33.1	0	0	0	-0.499622	-0.413395	-0.0409868	-0.330998	-0.622211	-0.267639	0.391018	0.30233	0.478085	0.853997	1.01499	0.98277	0.603389	0.633849	0.704696	0	-0.318001	-0.406949	0.390478	0.950587	0.647312
GPC6	Q9Y625	10082	6	4	6	5	2	4	14.8	8.5	13	0		0	-1.29972		-0.890827	-1.02681		-0.690898	-0.665245		-0.23475	-0.173823		0.476357	-0.573302		-0.14599	0	-1.09528	-0.858854	-0.449997	0.151267	-0.359646
CPQ	Q9Y646	10404	5	8	7	5	8	7	9.5	19.9	16.5	0	0	0	-0.743377	-0.704563	-0.436877	0.19807	-0.253174	-0.0712425	0.906886	0.382757	0.677348	1.16791	0.967365	1.04913	1.10778	0.881259	1.01596	0	-0.628272	-0.0421152	0.655664	1.06147	1.00166
NFS1	Q9Y697	9054	2	1	1	2	1	1	6.1	3.5	3.5	0		0	1.0805		-2.91524	0.899217		-2.70004	1.73698		-2.28632	2.14428		-1.66035	1.37341		-2.04603	0	-0.917367	-0.900411	-0.274668	0.241967	-0.33631
EMILIN1	Q9Y6C2	11117	22	20	20	22	20	20	25	24	25.4	0	0	0	-1.30114	-0.471006	-0.273216	-0.625808	-0.466268	-0.302921	0.0454524	0.108374	0.321067	0.195666	0.578015	0.769512	0.494613	0.859387	1.03528	0	-0.681788	-0.464999	0.158298	0.514398	0.796426

## Sheet: Table S2
Table S2. Results of Reactome enrichment analysis on secreted proteins.
ID	Description	BH-corrected p-value	No. of genes	geneID
R-HSA-1474244	Extracellular matrix organization	6.63215e-65	101	A2M/ADAM10/BGN/BMP1/BMP4/BSG/DDR1/SERPINH1/CDH1/COL1A1/COL1A2/COL2A1/COL3A1/COL4A1/COL4A2/COL5A1/COL5A2/COL6A1/COL6A2/COL6A3/COL7A1/COL8A1/COL11A1/COL12A1/COL16A1/HAPLN1/VCAN/CTSB/CTSD/CTSK/DAG1/DCN/FBLN2/FBN1/FBN2/FGF2/FN1/TNC/ICAM1/ITGA4/ITGB3/LAMA2/LAMA4/LAMA5/LAMB1/LAMB2/LAMC1/LOXL1/LOXL2/LTBP1/LTBP2/LUM/MATN3/MFAP1/MFAP2/MFAP4/MMP1/MMP2/MMP3/MMP7/MMP9/MMP11/MMP14/MMP16/NID1/DDR2/P4HA1/P4HB/P…
R-HSA-1474228	Degradation of the extracellular matrix	2.70199e-33	51	A2M/ADAM10/BMP1/BSG/CDH1/COL1A1/COL1A2/COL2A1/COL3A1/COL4A1/COL4A2/COL5A1/COL5A2/COL6A1/COL6A2/COL6A3/COL7A1/COL8A1/COL11A1/COL12A1/COL16A1/CTSB/CTSD/CTSK/DCN/FBN1/FBN2/FN1/LAMA5/LAMB1/LAMC1/MMP1/MMP2/MMP3/MMP7/MMP9/MMP11/MMP14/MMP16/NID1/SPP1/ADAM17/TIMP1/TIMP2/COL14A1/ADAM9/ADAMTS4/ADAMTS5/COL5A3/COL18A1/COL26A1
R-HSA-1474290	Collagen formation	1.21631e-32	42	BMP1/SERPINH1/COL1A1/COL1A2/COL2A1/COL3A1/COL4A1/COL4A2/COL5A1/COL5A2/COL6A1/COL6A2/COL6A3/COL7A1/COL8A1/COL11A1/COL12A1/COL16A1/CTSB/LOXL1/LOXL2/MMP3/MMP7/MMP9/P4HA1/P4HB/PCOLCE/PLOD1/PLOD2/PPIB/COL14A1/PXDN/PLOD3/ADAMTS2/CRTAP/P3H3/COL5A3/P3H1/COLGALT1/COL18A1/LOXL4/COL26A1
R-HSA-381426	Regulation of Insulin-like Growth Factor (IGF) transport and uptake by Insulin-like Growth Factor Binding Proteins (IGFBPs)	2.3297e-30	46	ADAM10/ALB/APOE/SERPINC1/BMP4/CALU/CSF1/VCAN/CST3/FBN1/FN1/TNC/IGFBP2/IGFBP3/IGFBP5/IGFBP7/CCN1/IL6/LAMB1/LAMB2/LAMC1/LTBP1/MATN3/MFGE8/MMP1/MMP2/NUCB1/P4HB/PAPPA/PRKCSH/DNAJC3/RCN1/SPP1/TIMP1/HSP90B1/SCG2/STC2/PDIA6/FSTL3/PRSS23/FSTL1/FAM20A/VWA1/CHRDL1/PCSK9/MIA3
R-HSA-8957275	Post-translational protein phosphorylation	7.72658e-29	42	ADAM10/ALB/APOE/SERPINC1/BMP4/CALU/CSF1/VCAN/CST3/FBN1/FN1/TNC/IGFBP3/IGFBP5/IGFBP7/CCN1/IL6/LAMB1/LAMB2/LAMC1/LTBP1/MATN3/MFGE8/NUCB1/P4HB/PRKCSH/DNAJC3/RCN1/SPP1/TIMP1/HSP90B1/SCG2/STC2/PDIA6/FSTL3/PRSS23/FSTL1/FAM20A/VWA1/CHRDL1/PCSK9/MIA3
R-HSA-1650814	Collagen biosynthesis and modifying enzymes	5.20485e-28	34	BMP1/SERPINH1/COL1A1/COL1A2/COL2A1/COL3A1/COL4A1/COL4A2/COL5A1/COL5A2/COL6A1/COL6A2/COL6A3/COL7A1/COL8A1/COL11A1/COL12A1/COL16A1/P4HA1/P4HB/PCOLCE/PLOD1/PLOD2/PPIB/COL14A1/PLOD3/ADAMTS2/CRTAP/P3H3/COL5A3/P3H1/COLGALT1/COL18A1/COL26A1
R-HSA-1442490	Collagen degradation	1.61255e-27	33	ADAM10/COL1A1/COL1A2/COL2A1/COL3A1/COL4A1/COL4A2/COL5A1/COL5A2/COL6A1/COL6A2/COL6A3/COL7A1/COL8A1/COL11A1/COL12A1/COL16A1/CTSB/CTSD/CTSK/MMP1/MMP2/MMP3/MMP7/MMP9/MMP11/MMP14/ADAM17/COL14A1/ADAM9/COL5A3/COL18A1/COL26A1
R-HSA-3000178	ECM proteoglycans	3.55664e-23	32	BGN/COL1A1/COL1A2/COL2A1/COL3A1/COL4A1/COL4A2/COL5A1/COL5A2/COL6A1/COL6A2/COL6A3/HAPLN1/VCAN/DAG1/DCN/FN1/TNC/ITGB3/LAMA2/LAMA4/LAMA5/LAMB1/LAMB2/LAMC1/LUM/MATN3/SPARC/TGFB2/COL5A3/LAMA1/AGRN
R-HSA-3000171	Non-integrin membrane-ECM interactions	5.29579e-22	28	DDR1/COL1A1/COL1A2/COL2A1/COL3A1/COL4A1/COL4A2/COL5A1/COL5A2/COL11A1/DAG1/FGF2/FN1/TNC/ITGB3/LAMA2/LAMA4/LAMA5/LAMB1/LAMB2/LAMC1/DDR2/SDC1/THBS1/COL5A3/NTN4/LAMA1/AGRN
R-HSA-2022090	Assembly of collagen fibrils and other multimeric structures	1.53406e-21	28	BMP1/COL1A1/COL1A2/COL2A1/COL3A1/COL4A1/COL4A2/COL5A1/COL5A2/COL6A1/COL6A2/COL6A3/COL7A1/COL8A1/COL11A1/COL12A1/CTSB/LOXL1/LOXL2/MMP3/MMP7/MMP9/PCOLCE/COL14A1/PXDN/COL5A3/COL18A1/LOXL4
R-HSA-216083	Integrin cell surface interactions	6.8189e-17	28	BSG/CDH1/COL1A1/COL1A2/COL2A1/COL3A1/COL4A1/COL4A2/COL5A1/COL5A2/COL6A1/COL6A2/COL6A3/COL7A1/COL8A1/COL16A1/FBN1/FN1/TNC/ICAM1/ITGA4/ITGB3/LUM/SPP1/THBS1/COL5A3/COL18A1/AGRN
R-HSA-8948216	Collagen chain trimerization	3.76138e-15	20	COL1A1/COL1A2/COL2A1/COL3A1/COL4A1/COL4A2/COL5A1/COL5A2/COL6A1/COL6A2/COL6A3/COL7A1/COL8A1/COL11A1/COL12A1/COL16A1/COL14A1/COL5A3/COL18A1/COL26A1
R-HSA-8874081	MET activates PTK2 signaling	6.23807e-15	17	COL1A1/COL1A2/COL2A1/COL3A1/COL5A1/COL5A2/COL11A1/FN1/HGF/LAMA2/LAMA4/LAMA5/LAMB1/LAMB2/LAMC1/COL5A3/LAMA1
R-HSA-114608	Platelet degranulation	1.08518e-12	29	A2M/ALB/ALDOA/APOH/SERPING1/CALU/CLU/ECM1/VEGFD/FN1/HGF/HSPA5/ISLR/ITGB3/LGALS3BP/ORM1/PFN1/PSAP/RARRES2/SPARC/TGFB2/THBS1/TIMP1/TIMP3/MANF/TAGLN2/CHID1/CD109/APOOL
R-HSA-76005	Response to elevated platelet cytosolic Ca2+	2.90928e-12	29	A2M/ALB/ALDOA/APOH/SERPING1/CALU/CLU/ECM1/VEGFD/FN1/HGF/HSPA5/ISLR/ITGB3/LGALS3BP/ORM1/PFN1/PSAP/RARRES2/SPARC/TGFB2/THBS1/TIMP1/TIMP3/MANF/TAGLN2/CHID1/CD109/APOOL
R-HSA-8875878	MET promotes cell motility	4.26594e-12	17	COL1A1/COL1A2/COL2A1/COL3A1/COL5A1/COL5A2/COL11A1/FN1/HGF/LAMA2/LAMA4/LAMA5/LAMB1/LAMB2/LAMC1/COL5A3/LAMA1
R-HSA-1566948	Elastic fibre formation	2.51893e-11	17	BMP4/FBLN2/FBN1/FBN2/FN1/ITGB3/LOXL1/LOXL2/LTBP1/LTBP2/MFAP1/MFAP2/MFAP4/TGFB2/EMILIN1/EMILIN2/LOXL4
R-HSA-6798695	Neutrophil degranulation	1.71458e-10	54	ACPP/ADAM10/ALDOA/ANPEP/ANXA2/B2M/BST1/CD14/ADGRE5/CTSC/CHI3L1/CST3/CTSB/CTSD/CD55/DDOST/GAA/B4GALT1/GLA/GLB1/GM2A/GNS/GPI/GRN/CXCL1/HEXB/HLA-C/HMGB1/LGALS3/MAN2B1/MANBA/MIF/MMP9/ORM1/PLAU/PLAUR/PRCP/DNAJC3/PSAP/PSMD1/SERPINB3/SRP14/TIMP2/RNASET2/GGH/MLEC/ATP6AP2/PRDX4/NPC2/ERP44/QPCT/DPP7/LPCAT1/TXNDC5
R-HSA-186797	Signaling by PDGF	2.26981e-10	18	COL2A1/COL3A1/COL4A1/COL4A2/COL5A1/COL5A2/COL6A1/COL6A2/COL6A3/PDGFRA/PDGFRB/PLAT/SPP1/THBS1/THBS2/BCAR1/COL5A3/PDGFD
R-HSA-3000157	Laminin interactions	1.54986e-09	13	COL4A1/COL4A2/COL7A1/LAMA2/LAMA4/LAMA5/LAMB1/LAMB2/LAMC1/NID1/NID2/COL18A1/LAMA1
R-HSA-2129379	Molecules associated with elastic fibres	3.57839e-09	14	BMP4/FBLN2/FBN1/FBN2/FN1/ITGB3/LTBP1/LTBP2/MFAP1/MFAP2/MFAP4/TGFB2/EMILIN1/EMILIN2
R-HSA-3000170	Syndecan interactions	5.65188e-09	12	COL1A1/COL1A2/COL3A1/COL5A1/COL5A2/FGF2/FN1/TNC/ITGB3/SDC1/THBS1/COL5A3
R-HSA-6806834	Signaling by MET	6.7387e-09	19	COL1A1/COL1A2/COL2A1/COL3A1/COL5A1/COL5A2/COL11A1/EPS15/FN1/HGF/LAMA2/LAMA4/LAMA5/LAMB1/LAMB2/LAMC1/SPINT1/COL5A3/LAMA1
R-HSA-2243919	Crosslinking of collagen fibrils	1.10222e-08	10	BMP1/COL1A1/COL1A2/COL4A1/COL4A2/LOXL1/LOXL2/PCOLCE/PXDN/LOXL4
R-HSA-3781865	Diseases of glycosylation	1.33567e-08	25	BGN/VCAN/DAG1/DCN/B4GALT1/GLB1/HEXA/HEXB/LUM/MPI/SDC1/THBS1/THBS2/SEMA5A/ADAMTS4/ADAMTS2/GPC6/SPON2/ADAMTS13/ADAMTS5/ADAMTS7/THSD4/ADAMTS12/B3GLCT/AGRN
R-HSA-2173782	Binding and Uptake of Ligands by Scavenger Receptors	1.36347e-08	14	ALB/APOE/CALR/COL1A1/COL1A2/COL3A1/COL4A1/COL4A2/MASP1/SAA1/SPARC/HSP90B1/HYOU1/SSC5D
R-HSA-5173214	O-glycosylation of TSR domain-containing proteins	3.86892e-08	13	THBS1/THBS2/SEMA5A/ADAMTS4/ADAMTS2/SPON2/ADAMTS13/ADAMTS5/ADAMTS7/POFUT2/THSD4/ADAMTS12/B3GLCT
R-HSA-1592389	Activation of Matrix Metalloproteinases	7.27693e-08	12	CTSK/MMP1/MMP2/MMP3/MMP7/MMP9/MMP11/MMP14/MMP16/TIMP1/TIMP2/COL18A1
R-HSA-5083635	Defective B3GALTL causes Peters-plus syndrome (PpS)	3.16906e-07	12	THBS1/THBS2/SEMA5A/ADAMTS4/ADAMTS2/SPON2/ADAMTS13/ADAMTS5/ADAMTS7/THSD4/ADAMTS12/B3GLCT
R-HSA-3000480	Scavenging by Class A Receptors	4.41842e-07	9	APOE/CALR/COL1A1/COL1A2/COL3A1/COL4A1/COL4A2/MASP1/HSP90B1
R-HSA-76002	Platelet activation, signaling and aggregation	4.47425e-07	32	A2M/ALB/ALDOA/APOH/SERPING1/CALU/CLU/COL1A1/COL1A2/ECM1/VEGFD/FN1/HGF/HSPA5/ISLR/ITGB3/LGALS3BP/ORM1/PFN1/PSAP/RARRES2/SPARC/TGFB2/THBS1/TIMP1/TIMP3/MANF/TAGLN2/BCAR1/CHID1/CD109/APOOL
R-HSA-9006934	Signaling by Receptor Tyrosine Kinases	5.19008e-07	45	ADAM10/AREG/COL1A1/COL1A2/COL2A1/COL3A1/COL4A1/COL4A2/COL5A1/COL5A2/COL6A1/COL6A2/COL6A3/COL11A1/EPS15/EREG/FGF2/VEGFD/FLT1/FN1/HGF/NRG1/ITGB3/LAMA2/LAMA4/LAMA5/LAMB1/LAMB2/LAMC1/MMP9/PCSK5/PDGFRA/PDGFRB/PGF/PLAT/SPINT1/SPP1/ADAM17/THBS1/THBS2/CILP/BCAR1/COL5A3/PDGFD/LAMA1
R-HSA-6783783	Interleukin-10 signaling	5.91045e-07	13	CSF1/CSF2/CSF3/CXCL1/CXCL2/ICAM1/IL6/CXCL8/LIF/CCL2/CCL5/TIMP1/TNFRSF1A
R-HSA-419037	NCAM1 interactions	1.34409e-06	12	COL2A1/COL3A1/COL4A1/COL4A2/COL5A1/COL5A2/COL6A1/COL6A2/COL6A3/PRNP/COL5A3/AGRN
R-HSA-5173105	O-linked glycosylation	1.04956e-05	18	DAG1/GALNT1/THBS1/THBS2/SEMA5A/ADAMTS4/ADAMTS2/SPON2/ADAMTS13/ADAMTS5/ADAMTS7/POFUT2/GALNT10/THSD4/ADAMTS12/B3GNT9/B3GNT7/B3GLCT
R-HSA-174824	Plasma lipoprotein assembly, remodeling, and clearance	1.06679e-05	14	A2M/ALB/APOC1/APOE/BMP1/LDLR/LIPA/P4HB/PCSK5/PLTP/LIPG/NPC2/LSR/PCSK9
R-HSA-6785807	Interleukin-4 and Interleukin-13 signaling	2.80638e-05	17	COL1A2/FGF2/FN1/HGF/ICAM1/IL6/CXCL8/LAMA5/LIF/MMP1/MMP2/MMP3/MMP9/SAA1/CCL2/TIMP1/HSP90B1
R-HSA-3906995	Diseases associated with O-glycosylation of proteins	5.3045e-05	13	DAG1/THBS1/THBS2/SEMA5A/ADAMTS4/ADAMTS2/SPON2/ADAMTS13/ADAMTS5/ADAMTS7/THSD4/ADAMTS12/B3GLCT
R-HSA-3560782	Diseases associated with glycosaminoglycan metabolism	7.57029e-05	10	BGN/VCAN/DCN/B4GALT1/HEXA/HEXB/LUM/SDC1/GPC6/AGRN
R-HSA-983170	Antigen Presentation: Folding, assembly and peptide loading of class I MHC	7.71353e-05	8	B2M/CALR/CANX/PDIA3/HLA-A/HLA-C/HSPA5/TAPBP
R-HSA-375165	NCAM signaling for neurite out-growth	0.000125088	12	COL2A1/COL3A1/COL4A1/COL4A2/COL5A1/COL5A2/COL6A1/COL6A2/COL6A3/PRNP/COL5A3/AGRN
R-HSA-2214320	Anchoring fibril formation	0.000292011	6	BMP1/COL1A1/COL1A2/COL4A1/COL4A2/COL7A1
R-HSA-140837	Intrinsic Pathway of Fibrin Clot Formation	0.000309971	7	A2M/SERPINC1/C1QBP/SERPING1/F9/SERPINE2/PRCP
R-HSA-1638074	Keratan sulfate/keratin metabolism	0.000856442	8	B4GALT1/GLB1/GNS/HEXA/HEXB/LUM/B4GALT4/B3GNT7
R-HSA-901042	Calnexin/calreticulin cycle	0.000993768	7	CALR/CANX/PDIA3/PRKCSH/OS9/GANAB/UGGT1
R-HSA-532668	N-glycan trimming in the ER and Calnexin/Calreticulin cycle	0.00102514	8	CALR/CANX/PDIA3/PRKCSH/MLEC/OS9/GANAB/UGGT1
R-HSA-381119	Unfolded Protein Response (UPR)	0.00127183	13	CALR/HDGF/HSPA5/CXCL8/DNAJB9/DNAJC3/CCL2/HSP90B1/PDIA6/HYOU1/PDIA5/DNAJB11/FKBP14
R-HSA-3560783	Defective B4GALT7 causes EDS, progeroid type	0.00156409	6	BGN/VCAN/DCN/SDC1/GPC6/AGRN
R-HSA-3560801	Defective B3GAT3 causes JDSSDHD	0.00156409	6	BGN/VCAN/DCN/SDC1/GPC6/AGRN
R-HSA-4420332	Defective B3GALT6 causes EDSP2 and SEMDJL1	0.00156409	6	BGN/VCAN/DCN/SDC1/GPC6/AGRN
R-HSA-2022857	Keratan sulfate degradation	0.00156409	5	GLB1/GNS/HEXA/HEXB/LUM
R-HSA-75205	Dissolution of Fibrin Clot	0.00156409	5	ANXA2/SERPINE2/PLAT/PLAU/PLAUR
R-HSA-879415	Advanced glycosylation endproduct receptor signaling	0.00156409	5	DDOST/HMGB1/LGALS3/PRKCSH/SAA1
R-HSA-449147	Signaling by Interleukins	0.00160057	36	ANXA2/CANX/COL1A2/CSF1/CSF2/CSF3/FGF2/FN1/CXCL1/CXCL2/HGF/HMGB1/ICAM1/IL6/CXCL8/IL11/LAMA5/LIF/MIF/MMP1/MMP2/MMP3/MMP9/P4HB/PSMB6/PSMD1/SAA1/CCL2/CCL5/SDC1/TIMP1/TNFRSF1A/HSP90B1/IL17RA/IL19/BOLA2
R-HSA-140877	Formation of Fibrin Clot (Clotting Cascade)	0.00194674	8	A2M/SERPINC1/C1QBP/SERPING1/F9/SERPINE2/PRCP/TFPI
R-HSA-2024101	CS/DS degradation	0.00222714	5	BGN/VCAN/DCN/HEXA/HEXB
R-HSA-381070	IRE1alpha activates chaperones	0.00285036	9	HDGF/HSPA5/DNAJB9/DNAJC3/PDIA6/HYOU1/PDIA5/DNAJB11/FKBP14
R-HSA-8964043	Plasma lipoprotein clearance	0.00392631	7	APOC1/APOE/LDLR/LIPA/NPC2/LSR/PCSK9
R-HSA-1630316	Glycosaminoglycan metabolism	0.00611078	14	BGN/VCAN/DCN/B4GALT1/GLB1/GNS/HEXA/HEXB/LUM/SDC1/B4GALT4/GPC6/B3GNT7/AGRN
R-HSA-8964058	HDL remodeling	0.00611078	4	ALB/APOE/PLTP/LIPG
R-HSA-1971475	A tetrasaccharide linker sequence is required for GAG synthesis	0.00635075	6	BGN/VCAN/DCN/SDC1/GPC6/AGRN
R-HSA-8963898	Plasma lipoprotein assembly	0.00753613	5	A2M/APOC1/APOE/BMP1/P4HB
R-HSA-8964038	LDL clearance	0.00973663	5	LDLR/LIPA/NPC2/LSR/PCSK9
R-HSA-1793185	Chondroitin sulfate/dermatan sulfate metabolism	0.00977123	8	BGN/VCAN/DCN/HEXA/HEXB/SDC1/GPC6/AGRN
R-HSA-381038	XBP1(S) activates chaperone genes	0.00977123	8	HDGF/DNAJB9/DNAJC3/PDIA6/HYOU1/PDIA5/DNAJB11/FKBP14
R-HSA-71387	Metabolism of carbohydrates	0.00993658	24	ALDOA/BGN/VCAN/DCN/GAA/B4GALT1/GLB1/GNS/GOT2/GPI/HEXA/HEXB/LUM/MAN2B1/MANBA/SDC1/NUP214/B4GALT4/GPC6/MAN2B2/NUP85/B3GNT7/FUT11/AGRN
R-HSA-1679131	Trafficking and processing of endosomal TLR	0.0169257	4	CTSB/CTSK/HSP90B1/CNPY3
R-HSA-71403	Citric acid cycle (TCA cycle)	0.0184966	5	CS/FH/IDH3B/SDHB/SUCLG1
R-HSA-5694530	Cargo concentration in the ER	0.0212981	6	AREG/CTSC/COL7A1/TMED2/LMAN2/MIA3
R-HSA-1660662	Glycosphingolipid metabolism	0.0260176	7	GALC/GLA/GLB1/GM2A/HEXA/HEXB/PSAP
R-HSA-3772470	Negative regulation of TCF-dependent signaling by WNT ligand antagonists	0.0286073	4	SFRP1/SFRP2/WNT5A/SOST
R-HSA-202733	Cell surface interactions at the vascular wall	0.038952	13	ANGPT1/BSG/COL1A1/COL1A2/FN1/GLG1/ITGA4/ITGB3/L1CAM/CD99/MIF/MMP1/SDC1

## Sheet: Table S3
Table S3. Data from Figure 1E.
	Median-centered Log2(TMT intensity ratio respect to 1st time point)
	D1-D2 Repl.1	D1-D2 Repl.2	D1-D2 Repl.3	D3-D4 Repl.1	D3-D4 Repl.2	D3-D4 Repl.3	D5-D6 Repl.1	D5-D6 Repl.2	D5-D6 Repl.3	D7-D8 Repl.1	D7-D8 Repl.2	D7-D8 Repl.3	D9-D10 Repl.1	D9-D10 Repl.2	D9-D10 Repl.3	D11-D12 Repl.1	D11-D12 Repl.2	D11-D12 Repl.3	Embryo stage
COMP	0	0	0	-9.19461	-8.90838	-8.94658	-6.22482	-7.12808	-6.40392	-6.53226	-6.90923	-6.36648	-5.66549	-5.94379	-4.5403	-4.82871	-4.52063	-4.50337	8 cell
THBS4	0	0	0	-9.03669	-7.35619	-2.82385	-7.57874	-6.54396	-3.74954	-6.15149	-6.52338	-3.19962	-5.71469	-6.03876	-2.60638	-6.07158	-5.47212	-2.81983	4 cell
OGN	0	0	0	-7.38792	-6.76326	-6.13861	-5.38511	-5.49073	-4.81048	-4.77801	-5.0417	-4.26869	-4.12698	-4.0118	-3.37251	-3.76208	-3.60744	-2.83607	Late ICM
FMOD	0	0	0	-4.64389	-4.81087	-4.69145	-3.15671	-3.27699	-3.45247	-2.13389	-2.45509	-2.61817	-1.81237	-1.84162	-1.86594	-1.59676	-1.54421	-1.60299	Late ICM
IGFBP6	0	0	0	-1.97368	-1.42026	-1.63015	-2.07784	-1.92688	-2.1032	-1.8457	-1.85157	-2.03562	-1.92871	-1.7465	-2.18415	-2.24892	-1.98359	-2.25327	4 cell
TNFAIP6	0	0	0	-3.26742	-1.34174	-1.09492	-2.99147	-1.39517	-1.78082	-2.35557	-0.791171	-1.15483	-2.23418	-0.70799	-0.578532	-2.02437	-0.595913	-0.915783	4 cell
EFEMP2	0	0	0	-1.38716	-0.943643	-3.05018	-0.717992	-0.580479	-2.70835	-0.154494	-0.144146	-2.28837	-0.119101	0.165539	-1.88148	-0.0286809	0.175566	-1.9711	Compacted morula
LTBP4	0	0	0	-0.361536	-2.29122	-1.79436	0.395647	-1.82815	-1.69653	1.18753	-1.13117	-0.997172	1.21168	-0.876025	-0.68903	1.21751	-1.25249	-1.0313	Compacted morula
PRELP	0	0	0	-1.76865	-3.22548	-0.967894	-0.813681	-3.04436	-0.482889	-0.0129301	-1.39346	0.139401	-0.305074	-1.57939	-0.059392	-0.837235	-2.51977	-0.445426	Late ICM
FRAS1	0	0	0	-1.68315	-2.28781	-0.817928	-1.41632	-2.51491	-0.606859	-0.867362	-1.95571	-0.131342	-0.73352	-1.30135	0.358683	-0.695973	-1.41082	0.31072	Late ICM
LRG1	0	0	0	-1.60199	-1.77715	-1.68957	-1.3824	-1.93589	-1.65915	-1.30572	-1.57133	-1.43852	-1.02281	-1.43799	-1.2304	-0.0462996	-0.328386	-0.187343	Early ICM
HAPLN3	0	0	0	-2.45344	-1.37672	-1.85134	-1.30823	-1.08196	-1.37266	-0.612983	-0.310789	-0.682919	-0.257415	0.562866	-0.0735947	0.286839	0.988204	0.49108	Zygote
HAPLN1	0	0	0	-2.37286	-1.51464	-1.80467	-1.34047	-0.840412	-1.35951	-0.714891	-0.180506	-0.626744	-0.221906	0.553202	0.178002	0.431294	0.94257	0.795222	Late ICM
TGFBI	0	0	0	-1.939	-1.96911	-1.79219	-1.10684	-1.37524	-1.36746	-0.21209	-0.279664	-0.392023	0.424066	0.353274	0.295223	0.63901	0.464825	0.381204	Early ICM
GAS6	0	0	0	-2.2284	-1.95221	-1.60544	-0.877423	-0.870779	-0.650069	-0.423087	-0.532314	-0.263515	-0.454185	-0.385784	-0.116248	-0.358025	0.0266881	0.101926	Early ICM
EFEMP1	0	0	0	-2.46549	-1.67283	-1.7754	-1.13588	-0.600802	-0.845277	-0.589029	-0.147775	-0.380812	-0.590884	0.00268056	-0.171233	-0.928947	-0.24422	-0.503017	Early ICM
FBLN1	0	0	0	-2.07493	-1.32295	-1.45076	-1.31459	-1.01534	-1.2078	-0.870345	-0.560757	-0.74745	-0.813497	-0.303801	-0.535121	-0.86475	-0.314658	-0.598931	Late ICM
IGFBP4	0	0	0	-1.53379	-1.22248	-1.07275	-0.871796	-0.963403	-0.818395	-0.471929	-0.69325	-0.447767	-0.392252	-0.460184	-0.313934	-0.364935	-0.3577	-0.089188	Late ICM
HSPG2	0	0	0	-1.52992	-1.12748	-0.949572	-1.20231	-1.28253	-1.29562	-0.610922	-0.621132	-0.666817	-0.198991	-0.029075	-0.101933	-0.505604	-0.272418	-0.411442	Late ICM
FBLN5	0	0	0	-1.32563	-0.83869	-0.906936	-1.17572	-1.10958	-1.2312	-0.703357	-0.61083	-0.703371	-0.470411	-0.270161	-0.422884	-0.141035	0.128867	-0.129606	4 cell
CRIM1	0	0	0	-1.58561	-0.773758	-1.06429	-1.14842	-0.594475	-1.0518	-0.59969	-0.307866	-0.445284	-0.537514	0.117146	-0.196899	-0.59589	0.11468	-0.0930813	Late ICM
EMILIN2	0	0	0	-1.31543	-0.807388	-0.653971	-0.772143	-0.720181	-0.723462	-0.205939	-0.284315	-0.141607	-0.181208	0.108707	0.0792889	-0.360741	-0.0876095	-0.221105	4 cell
VTN	0	0	0	-0.645252	-0.523885	-0.295226	-0.687741	-0.781793	-0.646187	-0.637351	-0.898359	-0.552357	-0.74379	-0.885766	-0.423269	-1.12002	-1.03123	-0.881614	Late ICM
CRELD2	0	0	0	-1.63976	-0.251418	-0.172269	-1.75828	-0.684121	-0.690609	-1.47847	-0.375837	-0.219089	-1.22875	0.248356	0.152923	-1.63615	-0.0913793	-0.245209	Zygote
THSD4	0	0	0	-1.44328	0.26163	-0.253696	-2.81798	0.374876	-0.667872	-0.879519	0.416083	-0.111968	-0.669095	1.27427	0.116958	-0.61896	0.916788	-0.269296	4 cell
MFGE8	0	0	0	-0.914248	-0.789577	-0.933654	-0.572427	-0.886572	-1.188	-0.194769	-0.133048	-0.398321	0.486308	0.748738	0.416099	0.421666	0.65868	0.228949	Late ICM
LAMA1	0	0	0	-1.19203	-0.795838	-0.812514	-0.414143	-0.49816	-0.560404	0.191103	0.0230448	0.0855058	0.482158	0.577271	0.457518	0.296082	0.438435	0.395928	Late ICM
ECM1	0	0	0	-1.0379	-0.893744	-0.520428	-0.306372	-0.59483	-0.288971	0.259361	-0.232897	0.123148	0.23724	0.0075292	0.322331	0.126802	-0.10959	0.233653	Late ICM
NID1	0	0	0	-0.809153	-0.566228	-0.517771	-0.216951	-0.391795	-0.448405	0.20512	-0.0857668	-0.0521295	0.296232	0.249382	0.185767	0.150891	0.0906193	0.0255934	Late ICM
PCOLCE	0	0	0	-0.870169	-0.343965	-0.475861	-0.0793769	0.146033	-0.354792	0.393022	0.353336	-0.0510298	0.5255	0.707094	0.330588	0.544038	0.748971	0.30934	Late ICM
FBLN1	0	0	0	-0.750334	-0.478836	-0.387301	-0.0642683	-0.0921039	-0.181135	0.452801	0.259799	0.230311	0.545472	0.647888	0.492223	0.681972	0.734649	0.651376	Late ICM
IGFBP2	0	0	0	-1.71208	-1.13515	-1.31613	-0.426037	-0.314177	-0.320913	0.394805	0.312314	0.451631	0.542173	0.859043	0.777165	0.456597	0.683669	0.702374	Late ICM
LAMB2	0	0	0	-1.41568	-0.765379	-0.716469	-0.763618	-0.452641	-0.51529	0.143855	0.391596	0.371682	0.688446	1.12963	1.02781	0.613675	1.06582	0.94126	Late ICM
MATN3	0	0	0	-1.37302	-1.03941	-1.7779	-0.659207	-0.544283	-1.43975	0.497532	0.656224	-0.27362	1.62233	1.76386	0.649364	1.63209	1.80165	0.970901	Late ICM
SPON2	0	0	0	-1.23984	-0.105616	-0.397178	-0.51254	-0.0242733	-0.353758	0.299825	0.843797	0.353365	0.771377	1.57037	1.02943	1.22937	1.86397	1.43321	Late ICM
LAMA5	0	0	0	-0.859564	-0.462428	-0.45836	0.202946	0.247983	-0.022581	0.936128	0.963106	0.778685	1.43415	1.76022	1.396	1.16608	1.53721	1.17507	Late ICM
MXRA5	0	0	0	-0.827593	-0.438492	-0.345738	0.249748	0.3212	0.175554	0.877921	0.959217	0.898115	1.24496	1.47577	1.39336	1.36184	1.59571	1.49368	Late ICM
SPARC	0	0	0	-0.572865	-0.422303	-0.0130453	0.530954	0.2958	0.537986	0.890913	0.499334	0.833728	0.999541	0.836381	1.12707	1.30882	1.24429	1.51993	Late ICM
COL6A3	0	0	0	-0.484546	-0.0538611	0.271153	0.229153	0.237259	0.48684	0.861886	0.828496	1.01228	1.15515	1.26923	1.32524	1.41288	1.51088	1.54525	8 cell
LAMC1	0	0	0	-0.328844	-0.118585	0.121506	0.528733	0.362628	0.464393	1.12928	0.803702	1.04206	1.32204	1.32378	1.43811	1.17868	1.14935	1.22826	Late ICM
SVEP1	0	0	0	-0.297675	0.196413	-0.0373625	0.53942	0.581499	0.334818	0.994001	0.980434	0.747036	1.20805	1.38605	1.16483	1.28953	1.47612	1.22451	Zygote
COL7A1	0	0	0	-0.0759452	0.0528849	0.183435	0.326049	0.110726	0.165997	0.750586	0.518591	0.435199	1.2202	1.21582	1.0429	1.26554	1.15004	1.18748	Late ICM
LAMA4	0	0	0	-0.541385	-0.35652	-0.154335	0.265272	0.0218251	0.0262201	0.687781	0.315904	0.544126	0.880987	0.81983	0.898928	0.807411	0.719207	0.743545	Late ICM
COL18A1	0	0	0	-0.786074	-0.62354	-0.322811	0.0459269	-0.203591	0.0342812	1.00339	0.781439	0.852384	1.3229	1.30177	1.42315	0.606018	0.434816	0.739539	Late ICM
SLIT3	0	0	0	-0.140214	0.132202	-0.10534	0.0439666	-0.362366	-0.552635	0.917937	0.91624	0.0834001	1.28896	1.51706	0.734399	0.621861	0.454455	-0.101533	4 cell
MFAP1	0	0	0	0.215736	0.405792	0.475393	0.164551	-0.0620127	-0.0971933	0.730419	0.532082	0.545531	0.973234	1.13141	0.931457	0.566308	0.731067	0.529307	8 cell
VWA1	0	0	0	0.330007	0.282178	-0.182518	0.746968	0.468298	-0.426134	1.51917	0.979856	0.235398	2.00002	1.61342	0.862182	1.63097	1.40434	0.599967	Late ICM
MFAP4	0	0	0	0.0162337	0.134895	-0.438267	0.752915	0.373099	-0.276118	0.980171	0.444417	-0.15352	1.58397	1.24586	0.695133	2.99544	2.80143	1.74397	Zygote
VCAN	0	0	0	-0.64278	-0.422318	-0.0535143	0.202595	0.223022	0.44967	1.00867	0.824258	1.24158	1.44751	1.63459	1.92595	1.66572	1.96054	2.19382	Late ICM
SPARC	0	0	0	0.425123	0.155986	0.694261	0.811245	0.511653	1.11084	1.11098	0.80129	1.42066	1.63997	1.11452	2.16542	1.82752	1.43967	2.21536	Late ICM
COL6A3	0	0	0	0.09855	0.67536	0.633252	0.925262	1.1581	0.83446	1.58817	1.74602	1.51663	1.82762	2.23446	1.78455	2.08194	2.56546	1.97015	8 cell
COL4A2	0	0	0	-0.20937	0.250359	0.397157	1.23708	1.14178	1.17428	1.97943	1.74368	1.71375	2.23229	2.25243	2.22876	2.53417	2.3055	2.34729	Late ICM
COL4A1	0	0	0	-0.184848	0.277669	0.555372	1.36665	1.06282	1.23304	2.07662	1.74034	1.87244	2.44518	2.27854	2.39748	2.71746	2.47052	2.54399	Late ICM
SPP1	0	0	0	0.238802	0.536913	0.298636	0.880775	0.646631	0.972623	2.02458	1.43378	1.81307	2.64113	2.44351	3.12592	3.17991	3.00705	3.36258	Late ICM
IGFBP3	0	0	0	-1.43335	-1.09697	-0.737543	0.228416	0.0134043	0.294154	1.38731	1.1017	1.42654	2.36833	2.07232	2.40325	3.39618	3.07572	3.46477	4 cell
COL26A1	0	0	0	-1.52946	-1.52946	-1.52946	1.76286	0.595119	-0.572624	2.59263	0.826611	-0.939412	3.13286	1.48543	-0.162001	3.67967	3.67967	3.67967	Late ICM

## Sheet: Table S4
Table S4. Data from Figure 1F.
	Median-centered Log2(TMT intensity ratio respect to 1st time point)
	D1-D2 Repl.1	D1-D2 Repl.2	D1-D2 Repl.3	D3-D4 Repl.1	D3-D4 Repl.2	D3-D4 Repl.3	D5-D6 Repl.1	D5-D6 Repl.2	D5-D6 Repl.3	D7-D8 Repl.1	D7-D8 Repl.2	D7-D8 Repl.3	D9-D10 Repl.1	D9-D10 Repl.2	D9-D10 Repl.3	D11-D12 Repl.1	D11-D12 Repl.2	D11-D12 Repl.3	SASP	Signaling by Interleukins	Regulation of IGF transport and uptake by IGFBPs	Signaling by PDGF	Signaling by MET	Signaling by WNT	Ligands
CXCL1	0	0	0	1.89656	2.06026	1.07505	2.82173	2.47815	1.56549	4.64931	4.25541	3.21938	5.67897	5.58988	4.37617	5.28395	5.12175	4.26542	yes	yes	no	no	no	no	yes
CXCL8	0	0	0	1.86266	1.05394	2.08787	2.44258	1.04186	2.32155	4.61281	3.1619	4.3655	5.63458	4.44714	5.60107	5.08171	3.74637	5.30278	yes	yes	no	no	no	no	no
CCL2	0	0	0	1.80795	1.34177	1.97447	2.69492	2.03246	2.61588	3.95693	3.04676	3.6037	4.24049	3.58049	4.19413	3.7005	2.98257	3.80755	yes	yes	no	no	no	no	yes
TNFSF9	0	0	0	2.33967	2.30513	2.51968	2.22475	2.25218	2.36965	3.15113	2.4504	2.99163	3.38696	3.45953	3.40915	3.30108	3.1152	3.1251	no	no	no	no	no	no	yes
CCL5	0	0	0	1.92989	-0.123869	1.51637	2.91134	0.379243	2.13906	3.41556	0.56356	2.11454	2.90227	0.465997	2.10218	2.24087	0.309017	1.63641	no	yes	no	no	no	no	yes
PI3	0	0	0	-0.526123	-2.19581	-0.658454	2.52068	0.442715	1.36839	3.69709	1.44212	2.51353	4.88647	2.76835	3.65254	5.41686	3.25705	4.25099	no	no	no	no	no	no	yes
SFRP2	0	0	0	0.964875	-0.330068	-0.739175	1.87342	0.28636	-0.671525	3.19113	1.74397	0.601527	3.99593	2.5011	1.86421	4.31454	2.80474	2.13855	no	no	no	no	no	yes	no
IL6	0	0	0	1.05077	1.2582	0.385194	1.03053	1.18596	0.269577	2.98482	3.01585	2.03095	3.99947	4.19503	3.06919	3.18239	3.38281	2.60923	yes	yes	yes	no	no	no	yes
RARRES2	0	0	0	0.244045	1.13986	0.156801	1.77547	2.22135	1.03932	2.42277	2.78647	1.53773	2.59633	3.14855	1.84271	2.58938	3.21496	1.82563	no	no	no	no	no	no	yes
MMP1	0	0	0	0.359004	0.0892747	0.540421	1.54802	0.877212	0.915072	2.26081	1.75768	1.7077	2.61565	2.18897	2.19483	2.25406	1.87757	1.94047	yes	yes	yes	no	no	no	yes
DCN	0	0	0	-0.283469	0.276005	0.227428	0.858935	0.826821	0.820303	1.43431	1.44545	1.33672	1.96314	2.1475	2.00303	2.3037	2.38179	2.3324	no	no	no	no	no	no	yes
SPP1	0	0	0	0.238802	0.536913	0.298636	0.880775	0.646631	0.972623	2.02458	1.43378	1.81307	2.64113	2.44351	3.12592	3.17991	3.00705	3.36258	yes	no	yes	yes	no	no	yes
CSF3	0	0	0	-2.4059	0.849478	0.927951	-2.05804	0.622724	1.09598	-0.235463	2.4972	2.81909	0.919436	3.69442	3.98034	0.558418	3.25175	4.04662	no	yes	no	no	no	no	yes
VEGFD	0	0	0	-1.34876	1.11213	0.774122	-0.935315	1.18078	0.80641	0.104188	2.12978	1.64733	0.550223	2.73248	2.34071	0.133102	2.27961	1.91773	no	no	no	no	no	no	no
PLTP	0	0	0	-1.24889	0.306131	-0.0548821	-0.53182	0.762399	0.0928706	0.361691	1.54861	0.928399	0.70294	1.96234	1.34531	0.375172	1.76725	1.24217	no	no	no	no	no	no	yes
IL19	0	0	0	-0.961033	0.435842	-0.139251	0.0246627	0.982454	0.211338	1.18962	1.84959	0.920157	1.31457	2.21583	1.48212	0.48339	1.72185	1.04302	no	yes	no	no	no	no	yes
CXCL5	0	0	0	-0.446126	-0.214796	-0.118332	-0.204855	-0.492261	-0.52982	1.66026	1.33964	1.03194	2.82802	2.82524	2.47552	2.34764	1.97227	2.07159	yes	no	no	no	no	no	yes
CSF2	0	0	0	-1.34392	-0.298734	-0.821328	-0.0788282	0.693381	0.307276	1.33571	2.17655	1.75613	2.60032	3.56729	3.0838	2.10757	2.85951	2.48354	yes	yes	no	no	no	no	yes
MMP3	0	0	0	-1.41415	-0.981246	-1.16612	-0.295107	-0.113691	-0.410469	1.46612	1.49902	1.19995	2.95865	3.16863	2.81973	3.0329	3.14449	3.04402	yes	yes	no	no	no	no	no
IGFBP3	0	0	0	-1.43335	-1.09697	-0.737543	0.228416	0.0134043	0.294154	1.38731	1.1017	1.42654	2.36833	2.07232	2.40325	3.39618	3.07572	3.46477	yes	no	yes	no	no	no	no
TGFB2	0	0	0	-2.44047	-0.95137	-0.761024	-0.433456	-0.0158367	0.24165	0.800448	1.16138	1.36881	1.56932	2.08416	2.45707	2.09979	2.48833	2.87531	no	no	no	no	no	no	yes
CTHRC1	0	0	0	-1.24777	-0.554947	-0.356179	-0.327725	-0.330104	-0.262263	0.189274	0.306538	0.362642	0.435486	0.784874	0.713289	0.86866	1.05699	1.19803	no	no	no	no	no	no	yes
IGFBP2	0	0	0	-1.71208	-1.13515	-1.31613	-0.426037	-0.314177	-0.320913	0.394805	0.312314	0.451631	0.542173	0.859043	0.777165	0.456597	0.683669	0.702374	yes	no	yes	no	no	no	no
SFRP1	0	0	0	-1.14169	-0.660646	-0.274492	-0.404824	-0.316833	-0.0772772	0.355479	0.443812	0.560353	0.461706	0.742767	0.929456	0.0262855	0.165681	0.44906	no	no	no	no	no	yes	yes
CST3	0	0	0	-1.28998	-0.498121	-0.0862984	-0.461792	-0.413858	-0.159482	0.5142	0.591027	0.401687	0.532869	0.767122	0.746516	0.210077	0.21604	0.395377	no	no	yes	no	no	no	no
TNFRSF11B	0	0	0	-0.960826	-0.853665	-0.60685	-0.354621	-0.546225	-0.426296	0.547126	0.425709	0.298906	0.686909	0.47767	0.409163	0.368546	0.264413	0.223452	yes	no	no	no	no	no	no
ADM	0	0	0	-0.851701	-0.322455	-0.679479	-0.317382	-0.146784	-0.526741	0.332971	0.398096	-0.0541534	0.742454	0.933512	0.424028	0.749203	0.748222	0.494386	no	no	no	no	no	no	yes
NUCB2	0	0	0	-0.556515	-0.254096	-0.37073	-0.202924	0.00194298	-0.260769	0.323069	0.354691	0.207755	0.491125	0.73433	0.519132	0.38255	0.741822	0.474359	no	no	no	no	no	no	yes
HLA-C	0	0	0	-0.851937	-0.0992019	-0.507683	-0.492241	-0.0841185	-0.366509	0.100421	0.308043	0.0569575	0.124379	0.649922	0.358149	0.0783158	0.611455	0.307937	no	no	no	no	no	no	yes
ADAM17	0	0	0	-1.02788	-0.509081	-0.695374	-0.635681	-0.245569	-0.611964	0.0770756	0.227222	-0.0567966	0.14364	0.719657	0.394538	0.338369	0.707012	0.341201	no	no	no	no	no	no	yes
ADAM9	0	0	0	-1.19706	-0.926082	-0.858617	-0.388052	-0.419174	-0.444011	0.130991	-0.0547312	0.00206827	0.251138	0.361313	0.41185	0.291906	0.500622	0.45919	no	no	no	no	no	no	yes
ECM1	0	0	0	-1.0379	-0.893744	-0.520428	-0.306372	-0.59483	-0.288971	0.259361	-0.232897	0.123148	0.23724	0.0075292	0.322331	0.126802	-0.10959	0.233653	no	no	no	no	no	no	yes
TIMP2	0	0	0	-0.96511	-0.568735	-0.583035	-0.391425	-0.364068	-0.58261	0.123161	0.0037711	-0.171598	0.120695	0.271656	0.156513	0.145819	0.324201	0.171477	yes	no	no	no	no	no	yes
NID1	0	0	0	-0.809153	-0.566228	-0.517771	-0.216951	-0.391795	-0.448405	0.20512	-0.0857668	-0.0521295	0.296232	0.249382	0.185767	0.150891	0.0906193	0.0255934	no	no	no	no	no	no	yes
FAS	0	0	0	-0.660624	-0.289204	-0.521972	-0.327056	-0.6626	-0.603211	0.242751	-0.0852523	-0.269981	0.397001	0.261083	0.306972	0.222702	0.06561	-0.100521	yes	no	no	no	no	no	no
CD55	0	0	0	-0.942647	-0.552629	-0.700334	-0.458525	-0.662891	-0.735249	0.120947	0.0797504	-0.00503739	0.369966	0.654101	0.464086	-0.073697	0.0900853	-0.207682	no	no	no	no	no	no	yes
MFGE8	0	0	0	-0.914248	-0.789577	-0.933654	-0.572427	-0.886572	-1.188	-0.194769	-0.133048	-0.398321	0.486308	0.748738	0.416099	0.421666	0.65868	0.228949	no	no	yes	no	no	no	yes
DNAJC3	0	0	0	-0.879641	-0.695856	-0.581947	-0.811593	-0.982653	-1.06933	0.083166	0.120031	-0.246904	0.663319	0.805672	0.529311	0.546214	0.414869	0.298339	no	no	yes	no	no	no	no
ANXA2	0	0	0	-0.22879	-0.578082	-0.211254	-0.362442	-1.04975	-0.829045	0.185496	-0.0877329	-0.0449321	0.731732	0.656055	0.546698	0.259699	0.0367969	-0.0263914	no	yes	no	no	no	no	no
SDC1	0	0	0	0.0748699	-0.510026	-0.318315	-0.0370186	-0.795743	-0.727253	0.546985	-0.57498	-0.373948	0.727263	-0.107278	-0.00559827	-0.0367279	-0.592814	-0.69473	no	yes	no	no	no	no	no
SERPINC1	0	0	0	-0.127793	-0.477288	-0.302541	-0.26759	0.689754	0.211082	0.849454	0.020038	0.434746	-0.199373	0.272425	0.0365263	-0.831272	-0.316436	-0.573854	no	no	yes	no	no	no	yes
CSF1	0	0	0	-1.17837	-0.389466	-0.185741	-0.589661	-0.187943	-0.0822661	-0.258656	-0.0501265	0.160892	-0.283343	0.034522	0.357332	-0.891023	-0.27778	-0.0181343	no	yes	yes	no	no	no	yes
EPS15	0	0	0	-0.798182	0.167631	0.0115749	-0.980929	-0.338634	-0.669646	-0.344989	0.292254	0.0251298	-0.0206267	0.855015	0.483092	-0.483614	0.306163	0.0545	no	no	no	no	yes	no	no
BOLA2	0	0	0	-0.658366	-0.0179859	0.113844	-0.884414	-0.590467	-0.59841	-0.235715	0.0838216	0.0522844	0.065135	0.625935	0.533997	-0.420418	0.131161	0.133408	no	yes	no	no	no	no	no
GPI	0	0	0	-0.598799	0.0185891	-0.0614869	-0.757207	-0.660958	-0.760638	-0.233098	0.056247	-0.156756	0.126512	0.466107	0.269552	-0.524411	-0.182568	-0.224411	no	no	no	no	no	no	yes
IL17RA	0	0	0	-0.215419	-0.154803	-0.276035	-0.542991	-0.586713	-0.49927	-0.194418	-0.153377	-0.235458	0.159285	0.0937322	0.224837	-0.265417	-0.0697193	-0.461114	no	yes	no	no	no	no	no
RCN1	0	0	0	-0.418003	0.0681263	-0.209751	-0.495856	-0.331566	-0.501348	-0.0880435	-0.0118328	-0.129565	0.157548	0.515485	0.207822	-0.0941375	0.31384	-0.0411876	no	no	yes	no	no	no	no
FBLN2	0	0	0	-0.890147	-0.384236	-0.320542	-0.62109	-0.524854	-0.634621	-0.189926	-0.00646328	-0.0902263	0.0625479	0.43485	0.187577	-0.119202	0.237448	0.0578731	no	no	no	no	no	no	yes
GNAS	0	0	0	-0.844516	-0.319827	-0.379073	-0.689269	-0.873685	-0.887806	-0.122339	-0.153261	-0.257862	0.000469374	0.514399	0.267658	-0.330259	-0.0038853	-0.40688	no	no	no	no	no	no	yes
PSMD1	0	0	0	-0.635581	-0.266829	-0.445074	-0.871615	-0.91707	-1.16599	-0.291619	-0.276654	-0.531617	0.0366477	0.289534	-0.106476	-0.396423	-0.157793	-0.525445	no	yes	no	no	no	yes	no
LRPAP1	0	0	0	-1.06608	-0.338106	-0.56307	-1.08311	-0.757177	-1.01717	-0.518834	-0.0875734	-0.361937	-0.0779969	0.599898	0.108248	-0.368847	0.321353	-0.168237	no	no	no	no	no	no	yes
BCAR1	0	0	0	-1.33642	-0.644506	-0.47237	-1.18971	-0.827734	-0.911339	-0.640275	-0.281655	-0.307719	-0.322646	0.381656	0.125524	-0.720857	0.0997972	-0.0673984	no	no	no	yes	no	no	no
PLAUR	0	0	0	-0.994302	-0.795896	-1.19271	-1.01874	-0.875796	-1.16168	-0.437691	-0.520729	-0.794404	-0.116457	0.0580904	-0.291004	-0.242333	-0.0760501	-0.408616	yes	no	no	no	no	no	no
PFN1	0	0	0	-1.15749	-0.693408	-0.539025	-1.32129	-1.32923	-1.57692	-0.158676	-0.301517	-0.741797	0.159351	0.376208	-0.0350345	-0.476516	-0.473087	-0.630468	no	no	no	no	no	yes	no
MIF	0	0	0	-1.06506	-1.07548	-0.355755	-1.33317	-1.56895	-1.34568	-0.116944	-0.525411	-0.136217	0.552313	0.555366	0.605804	-0.057098	-0.250204	-0.0630553	yes	yes	no	no	no	no	no
AIMP1	0	0	0	-0.831267	-0.414696	-0.0734082	-1.05201	-1.20464	-0.938202	-0.182332	-0.275334	-0.205706	0.0883495	0.393769	0.409804	-0.369189	-0.255714	-0.0681788	no	no	no	no	no	no	no
CCN1	0	0	0	-0.787747	-0.337841	0.0743475	-1.30622	-1.00635	-0.820861	-0.444529	-0.246265	-0.02049	0.0544927	0.332174	0.551878	-0.335186	0.00972631	0.367376	no	no	yes	no	no	no	no
PON2	0	0	0	-0.928406	-0.415723	0.0969607	-1.38721	-1.1226	-0.857992	-0.394896	-0.133223	0.12845	-0.451855	0.0899367	0.631729	-0.427783	-0.0749427	0.277897	no	no	no	no	no	no	yes
SEMA3A	0	0	0	-1.62217	-1.08467	-0.527344	-1.15836	-0.828659	-0.44806	-0.464405	-0.0053595	0.261551	-0.206517	0.344625	0.667731	-0.543125	0.194416	0.492254	no	no	no	no	no	no	yes
PLAT	0	0	0	-1.20061	-0.805358	-0.551211	-0.888854	-0.827764	-0.580979	0.140767	0.143466	0.291124	0.0520132	0.33462	0.444222	-0.472554	-0.344127	-0.0140384	yes	no	no	yes	no	no	yes
LTBP1	0	0	0	-1.50501	-1.1201	-0.937262	-0.748107	-0.853027	-0.801675	-0.0188198	-0.268455	-0.191399	0.0603531	0.0570005	0.178895	-0.00400971	-0.0932685	0.107686	no	no	yes	no	no	no	yes
MMP2	0	0	0	-1.28787	-0.754362	-0.789956	-0.954804	-0.88353	-0.920524	-0.596539	-0.500721	-0.591015	-0.269454	0.0222955	-0.0948943	0.154242	0.384808	0.335502	no	yes	yes	no	no	no	yes
GREM1	0	0	0	-1.26706	-0.909606	-0.931994	-1.16924	-1.27698	-1.38092	-0.588768	-0.792473	-0.908123	-0.1107	0.0945191	-0.113412	0.385967	0.516326	0.292352	no	no	no	no	no	no	yes
FBN1	0	0	0	-1.90782	-1.3744	-1.42092	-1.06362	-0.961516	-1.10304	-0.549787	-0.593524	-0.603012	-0.267597	-0.083251	-0.14622	0.176888	0.350489	0.306708	no	no	yes	no	no	no	yes
TIMP1	0	0	0	-1.74177	-1.17793	-0.965527	-1.11933	-0.950348	-0.818371	-0.296383	-0.298006	-0.204267	0.0614251	0.268435	0.424908	0.333632	0.491971	0.78844	yes	yes	yes	no	no	no	yes
STC2	0	0	0	-1.69241	-1.1263	-1.20913	-1.02475	-0.866835	-0.996867	-0.151543	0.0116475	-0.216985	0.352994	0.703182	0.4223	0.163117	0.457721	0.333811	no	no	yes	no	no	no	no
THBS2	0	0	0	-1.4771	-1.03516	-0.958763	-0.795709	-0.737651	-0.855567	-0.216342	-0.222617	-0.217186	0.131734	0.51467	0.333897	0.502331	0.741874	0.650996	no	no	no	yes	no	no	yes
BMP1	0	0	0	-1.7518	-1.28659	-1.12165	-0.79471	-0.621276	-0.851005	-0.126686	-0.0721126	-0.242817	0.246615	0.611204	0.339588	0.750479	1.06931	0.742971	no	no	no	no	no	no	no
FAM20A	0	0	0	-1.93436	-1.55016	-1.01837	-1.18625	-0.294662	-1.23418	0.144097	0.398295	0.0369334	-0.325221	0.793595	0.228704	-0.116637	0.793699	0.228966	no	no	yes	no	no	no	no
L1CAM	0	0	0	-1.62891	-0.857991	-1.40064	-0.77171	-0.391328	-0.959218	-0.208177	0.0396742	-0.48591	0.0931553	0.556859	-0.0365646	0.121571	0.684396	0.0375375	no	no	no	no	no	no	yes
TFPI	0	0	0	-1.26875	-0.464383	-1.16589	-0.568332	-0.262857	-0.937715	-0.063948	0.193577	-0.504261	0.123922	0.478634	-0.138117	0.0196639	0.467714	-0.0445531	no	no	no	no	no	no	yes
PDGFRB	0	0	0	-1.29911	-0.417143	-0.98511	-0.540773	-0.19562	-0.947043	-0.0575025	0.398398	-0.392291	0.133497	0.866593	0.0629652	0.302318	0.923419	0.0159083	no	no	no	yes	no	no	no
HLA-C	0	0	0	-1.6875	0.369708	-0.501251	-1.39688	-0.21223	-0.850995	-0.588064	0.767178	-0.301643	-0.508841	0.969415	0.160787	-0.435575	1.0192	-0.244665	no	no	no	no	no	no	yes
SAA1	0	0	0	-2.44255	-0.225222	-1.33388	-2.26817	0.359592	-0.95429	-1.58127	0.444855	-0.56821	-0.844677	1.15371	0.154514	-1.00757	1.23156	0.111996	no	yes	no	no	no	no	yes
SERPING1	0	0	0	-2.42698	-1.0947	-1.217	-1.34	-0.331411	-0.694467	-1.00006	0.0082117	-0.0338848	-0.559874	0.241401	0.139581	-0.654101	0.826424	0.47398	no	no	no	no	no	no	yes
AREG	0	0	0	-1.28524	-0.812098	0.152628	-0.738455	-0.270507	0.693235	-0.455719	0.34563	1.11846	-0.656524	0.395118	1.56555	-0.928972	0.0886632	1.22464	yes	no	no	no	no	no	yes
CHRDL1	0	0	0	-3.13735	-1.17033	-0.440694	-2.02227	-0.210112	0.571923	-0.959401	0.712871	1.16237	-1.07582	0.467977	1.26873	-1.3101	0.213323	0.880628	no	no	yes	no	no	no	no
CD14	0	0	0	-2.36122	-1.14745	-0.226028	-2.09212	-1.53257	-0.691387	-1.38845	-0.396455	0.115252	-0.812578	0.356552	0.822456	-1.51021	-0.283426	0.415445	no	no	no	no	no	no	yes
CXCL2	0	0	0	-3.16731	-1.65465	-1.43075	-2.68595	-1.68579	-1.65028	-1.51352	-0.476232	-0.584283	-0.668222	0.92666	0.528318	-1.49237	-0.469871	-0.0869729	yes	yes	no	no	no	no	yes
TNFRSF1A	0	0	0	-3.05192	-2.06246	-1.07299	-1.88449	-1.30626	-0.728025	-2.58965	-1.3638	-0.137945	0.236524	0.236524	0.236524	-2.23292	-0.990669	0.251586	yes	yes	no	no	no	no	no
FGF2	0	0	0	-1.4502	-1.14551	-0.538811	-1.4554	-1.80035	-1.13908	-1.35677	-1.63874	-1.28507	-1.70411	-1.60149	-1.22212	0.47515	0.0815923	0.628412	yes	yes	no	no	no	no	yes
FSTL3	0	0	0	-1.70692	-1.99887	-2.15853	-1.74145	-1.77897	-1.94248	-0.445542	-0.964943	-1.19385	-0.05429	-0.19385	-0.345498	0.509154	0.378117	0.246055	no	no	yes	no	no	no	no
TIMP3	0	0	0	-2.11972	-1.26315	-1.31878	-1.85783	-1.56518	-1.65647	-0.807207	-0.391957	-0.269986	0.0380578	0.490022	0.637433	0.5597	0.492127	0.85156	no	no	no	no	no	no	yes
SOST	0	0	0	-2.28437	-1.17866	-1.69408	-1.71456	-1.1422	-2.07121	-0.681065	-0.408006	-1.19722	0.535704	0.587822	0.0989136	0.987129	0.753141	0.31184	no	no	no	no	no	yes	yes
KISS1	0	0	0	-2.4121	-1.8728	-2.95139	-1.00311	-0.13629	-1.86994	-0.412057	0.281875	-1.10599	0.0265139	0.814209	-0.761181	0.580472	1.1395	0.0214435	no	no	no	no	no	no	yes
LIF	0	0	0	-1.10817	-0.688747	-1.52758	-1.30459	-0.868555	-1.74063	-0.308814	0.346352	-0.963979	0.423563	1.30449	-0.457367	0.505591	1.24724	-0.23606	no	yes	no	no	no	no	yes
ANG	0	0	0	-0.697983	-0.637937	-2.13983	-0.321161	-0.773552	-2.28766	0.829184	0.205112	-1.57876	1.0392	0.569872	-1.22877	0.634861	0.0929174	-1.77736	yes	no	no	no	no	no	no
GAL	0	0	0	-0.97943	-2.7069	-2.00443	-0.372664	-2.16911	-2.02064	0.9524	-0.833627	-0.71507	1.71568	-0.128441	0.204676	1.68956	-0.181316	0.24133	no	no	no	no	no	no	yes
EREG	0	0	0	-0.568887	-1.54037	-1.54129	-0.3035	-2.17176	-1.45922	0.680576	-1.19309	-0.638368	1.03441	-0.396817	-0.0908406	0.58932	-0.743784	-0.217702	yes	no	no	no	no	no	yes
WNT5A	0	0	0	-1.29065	-1.98657	-0.906695	-0.806044	-2.01617	-1.12963	0.231215	-0.675172	-0.0969313	0.715445	-0.111438	0.475758	0.676797	-0.407182	0.2936	no	no	no	no	no	yes	yes
HGF	0	0	0	-0.58853	-0.407967	-0.61089	0.154983	-0.0278585	-0.388417	1.05838	0.827852	0.567742	1.0634	0.942623	0.730964	0.313047	0.240425	0.0681307	yes	yes	no	no	yes	no	yes
SLIT3	0	0	0	-0.140214	0.132202	-0.10534	0.0439666	-0.362366	-0.552635	0.917937	0.91624	0.0834001	1.28896	1.51706	0.734399	0.621861	0.454455	-0.101533	no	no	no	no	no	no	yes
NAMPT	0	0	0	0.168302	0.0700936	-0.110265	0.324308	-0.102738	-0.431344	0.872167	0.727438	0.333539	1.50575	1.41968	1.00445	0.763784	0.820094	0.374077	no	no	no	no	no	no	yes
PDIA6	0	0	0	-0.188916	0.0796303	-0.0772763	0.0960723	0.0292119	-0.230213	0.706221	0.760512	0.459366	1.30048	1.44972	1.00489	0.86868	0.966284	0.586954	no	no	yes	no	no	no	no
CALU	0	0	0	-0.151244	-0.0281794	0.00337774	-0.0849566	-0.129621	-0.414668	0.429038	0.265636	0.0820896	0.878353	0.857144	0.713919	0.927661	1.01528	0.859271	no	no	yes	no	no	no	no
HSP90B1	0	0	0	-0.451461	0.110166	0.0538927	-0.308689	-0.178603	-0.221995	0.359657	0.604999	0.501197	0.827501	1.28314	0.991108	0.44309	0.831946	0.612459	no	yes	yes	no	no	no	yes
UTS2	0	0	0	-0.229173	0.397424	0.259291	-0.245315	-0.0358711	-0.120074	0.39923	0.527587	0.439175	0.728347	1.2146	0.905201	0.415922	0.777179	0.461951	no	no	no	no	no	no	yes
HLA-A	0	0	0	-0.291269	0.304943	0.168154	0.0311328	0.134452	-0.0505737	0.618316	0.638478	0.461128	0.683155	1.03089	0.897644	0.324168	0.561633	0.461307	no	no	no	no	no	no	yes
PRKCSH	0	0	0	0.069982	0.440453	0.435208	0.0260783	0.0319836	0.135587	0.485891	0.409625	0.518136	0.761916	0.974702	0.889543	0.499719	0.653755	0.617289	no	no	yes	no	no	no	no
NAP1L4	0	0	0	0.215921	-0.0208061	0.458663	-0.0219063	-0.586359	-0.208464	0.613537	0.00396404	0.41712	0.931604	0.496244	0.867132	0.368872	0.00657069	0.427782	yes	no	no	no	no	no	no
PSMB6	0	0	0	-0.135052	0.0484824	0.370279	-0.363799	-0.428045	-0.262424	0.366953	0.102452	0.297374	0.647445	0.659425	0.815925	0.155837	0.15909	0.50116	no	yes	no	no	no	yes	no
ADAM10	0	0	0	-0.41292	-0.290607	0.0740678	-0.0881236	-0.261914	-0.0838993	0.436628	0.201008	0.451954	0.586055	0.504618	0.761635	0.407041	0.308264	0.650374	no	no	yes	no	no	no	yes
CALR	0	0	0	-0.130943	0.165868	0.15233	-0.145051	-0.127898	-0.18802	0.246175	0.225248	0.213599	0.542883	0.810956	0.578414	0.241793	0.561449	0.372552	no	no	no	no	no	no	yes
P4HB	0	0	0	-0.492677	-0.024861	-0.0969297	-0.407366	-0.340303	-0.403787	0.16176	0.216446	0.19048	0.525538	0.844391	0.631613	0.140113	0.490661	0.29367	no	yes	yes	no	no	no	yes
MIA3	0	0	0	-0.726357	-0.0390343	0.0475499	-0.438283	-0.191385	-0.0360712	0.191834	0.349317	0.506409	0.426014	0.921659	0.961154	0.182666	0.656476	0.735303	no	no	yes	no	no	no	no
NTN4	0	0	0	-0.735146	-0.525865	-0.319969	-0.525941	-0.111876	-0.0080928	0.363337	0.501301	0.639019	0.618784	1.17439	1.00859	0.176346	0.558338	0.572325	no	no	no	no	no	no	yes
B2M	0	0	0	-0.911954	0.0778831	0.0113367	-0.222912	0.576195	0.255232	0.508063	1.00961	0.553669	0.303685	0.962095	0.948971	0.182661	0.925168	0.716775	no	no	no	no	no	no	yes
GDF15	0	0	0	-0.665119	-0.0837154	0.851944	-0.411367	-0.384168	0.419706	0.529055	0.651047	1.32887	0.911102	1.24904	1.955	0.60891	0.787906	1.66217	yes	no	no	no	no	no	no
MMP14	0	0	0	-0.358873	-0.380505	0.605661	0.000454272	-0.303683	0.410668	0.447884	0.345543	0.867078	0.88711	0.781133	1.62156	0.937779	0.794685	1.77919	yes	no	no	no	no	no	no
PSAP	0	0	0	0.0163974	0.222864	0.284741	0.311178	0.204492	0.12319	0.918179	0.7153	0.720577	1.22818	1.32828	1.23556	1.0927	1.14319	1.15182	no	no	no	no	no	no	yes
PTN	0	0	0	0.0373414	0.582634	0.283422	0.494583	0.564617	0.401365	0.749086	0.759807	0.662044	0.904401	1.08517	1.04179	0.687563	0.995902	0.935779	no	no	no	no	no	no	yes
NID2	0	0	0	-0.146231	0.308989	0.252759	0.524717	0.544439	0.306998	0.87423	0.772339	0.683124	0.803256	0.973356	0.753918	0.415318	0.613814	0.270573	no	no	no	no	no	no	yes
MFAP2	0	0	0	-0.343878	0.783559	-0.0124901	-0.0567345	0.857225	-0.0273731	0.511498	1.17079	0.47119	0.667954	1.48222	0.687478	0.624013	1.56808	0.81858	no	no	no	no	no	no	yes
HMGB1	0	0	0	0.707736	1.24431	0.913898	0.607658	1.1027	0.333673	1.13662	1.2398	0.934318	1.42844	1.77141	1.34195	0.929621	1.48267	0.881106	no	yes	no	no	no	no	yes
MDK	0	0	0	0.0975149	0.501063	0.272939	0.598058	0.676219	0.601581	1.11163	1.2927	1.1779	1.38461	1.77771	1.71478	0.970037	1.55694	1.39986	no	no	no	no	no	no	yes
PLAU	0	0	0	-0.676451	0.0124634	0.143088	0.1937	0.334982	0.519228	0.945153	1.20003	1.08947	1.27097	1.71491	1.62017	1.04227	1.32793	1.484	yes	no	no	no	no	no	yes
AGRN	0	0	0	-0.542969	-0.054478	0.140231	0.288593	0.354555	0.381259	1.10103	1.13036	1.05221	1.37115	1.64427	1.59245	0.783586	1.02365	1.07402	no	no	no	no	no	no	yes
LGALS3BP	0	0	0	-0.25938	-0.13991	-0.0193365	0.731018	0.380275	0.509757	1.34585	0.809287	1.01044	1.42991	1.26392	1.46569	1.23569	1.03697	1.2234	no	no	no	no	no	no	yes
A2M	0	0	0	-0.238135	0.0238352	0.40292	0.707841	0.572928	0.926523	1.0461	0.820951	1.33789	1.24914	1.23655	1.72284	1.14231	1.14787	1.69734	no	no	no	no	no	no	yes
TCN2	0	0	0	0.228384	0.754568	1.59961	0.39312	0.513938	1.18183	0.288619	0.608162	1.10386	0.37105	0.703286	1.30372	0.199831	0.708661	1.23156	no	no	no	no	no	no	yes
SCG2	0	0	0	0.689835	1.58162	1.23548	1.13405	1.69316	1.32754	1.35409	1.5631	1.38356	0.242085	0.750002	0.485743	-0.378822	0.3624	-0.249619	no	no	yes	no	no	no	no
CCK	0	0	0	1.36551	0.98735	1.17643	-0.653727	-0.752497	-0.703112	2.70636	2.19971	2.45303	1.57564	1.36322	1.46943	1.7565	1.39062	1.57356	no	no	no	no	no	no	yes
PGF	0	0	0	0.943146	-0.497964	0.98762	1.22861	-0.482939	0.478501	1.75691	0.164238	1.47958	2.32019	1.10061	1.89847	1.80087	0.578112	1.56665	no	no	no	no	no	no	yes
VWA1	0	0	0	0.330007	0.282178	-0.182518	0.746968	0.468298	-0.426134	1.51917	0.979856	0.235398	2.00002	1.61342	0.862182	1.63097	1.40434	0.599967	no	no	yes	no	no	no	no
CXCL14	0	0	0	0.817031	0.205788	-0.405454	1.65235	0.75005	-0.152252	2.06334	1.14079	0.218234	2.30564	1.40618	0.506731	2.12817	1.18709	0.24601	no	no	no	no	no	no	no
NTN1	0	0	0	0.268172	-0.906393	-1.45478	0.830214	-1.16744	-1.11409	2.11111	0.230519	-0.33167	2.76403	0.931012	0.414616	2.57991	1.04056	-0.21582	no	no	no	no	no	no	yes
PDGFRA	0	0	0	0.697032	0.0255001	-0.646031	0.616568	-0.164805	-0.946177	1.32611	0.403824	-0.518464	1.40753	0.55135	-0.304829	1.19462	0.479455	-0.235714	no	no	no	yes	no	no	no
PDGFD	0	0	0	-0.529544	-0.775555	-1.02156	0.560738	-0.290596	-1.14193	0.817717	0.183629	-0.450459	1.19281	0.648318	0.103829	0.710056	0.411526	0.112995	no	no	no	yes	no	no	yes
PCSK9	0	0	0	-1.31617	-1.30334	-1.38823	-0.108966	-0.60887	-0.731807	0.884059	0.559721	0.0979831	1.14136	0.998345	0.524239	0.970251	0.679462	0.395025	no	no	yes	no	no	no	yes
ANGPT1	0	0	0	-1.35923	-1.12443	-1.61759	-0.210332	-0.400611	-1.01638	0.452125	0.304092	-0.416403	1.02451	1.02472	0.404207	1.31338	1.23138	0.706291	no	no	no	no	no	no	yes
MATN3	0	0	0	-1.37302	-1.03941	-1.7779	-0.659207	-0.544283	-1.43975	0.497532	0.656224	-0.27362	1.62233	1.76386	0.649364	1.63209	1.80165	0.970901	no	no	yes	no	no	no	no
FN1	0	0	0	-1.91335	-1.45938	-1.11938	-0.909924	-0.827674	-0.849359	-0.159455	-0.173294	-0.218118	0.47527	0.713268	0.725601	1.08098	1.23803	1.19867	yes	yes	yes	no	no	no	yes
CTSB	0	0	0	-1.38827	-0.853566	-1.03732	-0.637272	-0.525947	-0.646567	0.113431	0.105935	0.0542857	0.716924	1.01086	0.896501	1.11273	1.39008	1.44633	yes	no	no	no	no	no	no
TNC	0	0	0	-1.7197	-0.52159	-0.724584	-0.916966	-0.0474718	-0.496443	-0.241416	0.527569	0.233658	0.370956	1.39876	1.0222	1.02882	2.08733	1.58791	no	no	yes	no	no	no	yes
SPON2	0	0	0	-1.23984	-0.105616	-0.397178	-0.51254	-0.0242733	-0.353758	0.299825	0.843797	0.353365	0.771377	1.57037	1.02943	1.22937	1.86397	1.43321	no	no	no	no	no	no	yes
CCN2	0	0	0	-1.05661	0.171573	-0.617692	-0.352472	0.817484	-0.317797	0.404064	1.41714	0.346997	0.877475	2.09521	0.973909	1.52893	2.65641	1.77237	no	no	no	no	no	no	no
NRG1	0	0	0	-0.0663647	0.183184	-0.468485	0.0587318	0.0531623	-0.608418	0.815686	0.576211	0.0558998	1.62573	1.77701	0.809895	1.33944	1.4976	0.862455	yes	no	no	no	no	no	yes
SPINT1	0	0	0	-0.78649	-0.411594	-0.912352	-0.166853	-0.176917	-0.868309	0.748719	0.540825	-0.038285	1.2163	1.55385	0.776993	1.21444	1.50641	0.750701	no	no	no	no	yes	no	yes
SERPINE2	0	0	0	-0.480256	-0.251629	-0.548731	-0.0359135	-0.0438895	-0.552711	0.398583	0.798025	0.187258	1.04291	1.24397	0.640111	1.01536	1.35382	0.695622	no	no	no	no	no	no	yes
PRSS23	0	0	0	-0.859232	-0.0929762	-0.563306	-0.0354493	0.436023	-0.252294	0.739902	1.17771	0.464942	0.940621	1.4147	0.941565	1.02706	1.49489	0.84743	no	no	yes	no	no	no	yes
BST1	0	0	0	-1.23707	-0.541625	-0.858464	-0.0711067	0.282018	-0.0522174	0.978431	0.933706	0.589812	1.10015	1.59703	1.19067	1.17569	1.53815	1.25264	no	no	no	no	no	no	yes
BMP4	0	0	0	-1.37506	-1.05089	-0.726717	0.0704556	0.0868467	0.103238	0.716117	0.715781	0.715444	0.933264	1.18552	1.43778	0.834245	0.801537	0.768828	no	no	yes	no	no	no	yes
APOD	0	0	0	-0.808051	-0.537332	-0.428706	0.407694	0.316476	0.25121	1.09255	0.981912	0.935001	1.06644	1.1159	1.1238	1.00484	0.953593	1.04507	no	no	no	no	no	no	yes
SEMA5A	0	0	0	-0.337839	-0.348356	-0.374316	0.252865	-0.085266	-0.0810865	0.996025	0.498384	0.408291	1.15113	0.94863	0.805837	1.22969	1.00841	0.867865	no	no	no	no	no	no	yes
NUCB1	0	0	0	-0.466811	-0.232399	-0.0675874	0.220574	0.356919	0.120085	0.649168	0.597893	0.539923	0.910351	1.00062	0.925742	0.855463	1.05661	0.979418	no	no	yes	no	no	no	no
CANX	0	0	0	-0.508497	-0.416344	0.0605999	0.183275	-0.0996975	0.28367	0.807485	0.354485	0.817922	0.974211	1.24121	1.30119	0.825887	0.856987	0.841716	no	yes	no	no	no	no	no
IGFBP7	0	0	0	-0.941718	-0.505122	-0.218338	0.0354706	0.0661398	0.370973	0.459037	0.333114	0.831781	0.659705	0.800101	1.25226	0.971507	1.17065	1.55686	yes	no	yes	no	no	no	no
IGFBP5	0	0	0	-0.514473	-0.129487	-0.0743475	0.00461097	0.103802	0.0335174	0.694612	0.70177	0.735206	1.14816	1.26571	1.38586	1.28971	1.52738	1.54847	no	no	yes	no	no	no	no
FSTL1	0	0	0	-0.790015	-0.474638	-0.392226	0.396999	0.456113	0.275012	1.06347	0.909195	0.925094	1.44379	1.53555	1.48318	1.67962	1.90465	1.8017	no	no	yes	no	no	no	no
VCAN	0	0	0	-0.64278	-0.422318	-0.0535143	0.202595	0.223022	0.44967	1.00867	0.824258	1.24158	1.44751	1.63459	1.92595	1.66572	1.96054	2.19382	no	no	yes	no	no	no	yes
BGN	0	0	0	-0.627017	-0.138703	-0.0854454	0.435954	0.352934	0.464429	0.96061	0.881775	0.922087	1.38911	1.50523	1.46649	2.16124	2.29648	2.31626	no	no	no	no	no	no	yes
ICAM1	0	0	0	-0.42211	-0.558571	-0.30512	0.453508	-0.272081	-0.0756617	1.43735	0.83255	0.97416	2.1635	1.82241	1.88127	2.01581	1.57634	1.7818	yes	yes	no	no	no	no	yes
APOE	0	0	0	-0.743786	-0.665058	-0.58758	0.0830555	-0.326867	-0.29586	1.00502	0.698438	0.620406	1.85348	1.69092	1.69931	2.49905	2.4036	2.53309	no	no	yes	no	no	no	yes
THBS1	0	0	0	-0.677165	-0.687992	-0.338677	-0.0832952	-0.288238	-0.428471	0.656429	0.380168	0.372586	1.58641	1.54523	1.50445	2.28017	2.23408	2.08607	no	no	no	yes	no	no	yes
INHBA	0	0	0	-1.35469	-1.36622	-1.14485	-0.722587	-0.914273	-0.715391	0.824503	0.491786	0.590063	1.78292	1.457	1.72077	2.0701	1.73431	2.1784	yes	no	no	no	no	no	yes
IL11	0	0	0	-0.873324	-0.592539	0.157968	-1.01565	-0.951307	-0.520482	0.482599	0.334959	0.906789	1.31394	1.38563	2.08404	2.22243	1.97647	3.21792	yes	yes	no	no	no	no	yes
ORM1	0	0	0	-0.0307866	-0.682229	0.620656	-0.297497	-1.06465	0.469657	0.11114	-0.880771	1.10305	-0.559794	-0.4077	-0.711888	3.17975	1.3521	5.00741	no	no	no	no	no	no	yes
ALB	0	0	0	-3.44207	-2.31714	-2.27738	-3.06506	-2.32603	-2.41695	-2.77434	-2.09794	-2.27286	-4.72579	-4.92288	-4.0855	3.7262	4.45928	4.43984	no	no	yes	no	no	no	yes
TDGF1	0	0	0	-5.85172	-1.68823	-0.47687	-4.05699	-1.22431	0.421434	-2.63804	0.000904599	2.07819	-1.53568	1.19682	3.30231	-0.992919	1.76764	3.95478	no	no	no	no	no	no	yes
MMP7	0	0	0	-3.43471	-1.50726	-0.86486	-2.28064	-0.805748	-0.384627	-0.860709	0.364602	0.681681	-0.201265	1.59456	1.74577	0.557593	1.59077	2.12418	no	no	no	no	no	no	yes
PAPPA	0	0	0	-2.85724	-1.74672	-1.45647	-1.84245	-1.36979	-0.946182	-1.04501	-0.688579	-0.196154	-0.109031	0.431667	0.859736	0.679401	1.10442	1.83934	no	no	yes	no	no	no	no
CSH1	0	0	0	-3.37318	-0.879762	-0.81805	-1.39714	-1.67219	-0.932532	-0.272011	-0.367005	0.0620297	1.02142	1.26282	1.67392	1.75238	2.10427	2.52045	no	no	no	no	no	no	yes
MMP9	0	0	0	-2.52698	-2.83075	-2.29078	-2.48171	-2.55466	-2.43404	0.0857981	-0.543748	-0.200511	1.69781	1.5477	1.70749	2.76643	2.52261	2.75337	no	yes	no	no	no	no	yes
SEMA6A	0	0	0	-2.92656	-2.69711	-3.15601	-2.82159	-2.69596	-2.94722	-0.943767	-0.773025	-1.11451	0.558226	0.674717	0.441736	1.45184	1.61431	1.28937	no	no	no	no	no	no	yes
CDH1	0	0	0	-3.55612	-5.11915	-1.9931	-3.51942	-4.81083	-2.22802	-2.52783	-3.54454	-1.51113	-0.567867	-1.9056	0.769866	0.449404	-0.751235	1.65004	no	no	no	no	no	no	yes

## Sheet: Table S5
Table S5. Genesets used to perform GSEA in Figure 2E.
Reported Name	Official Name	Reference
Reactome
MET SIGNALING	REACTOME_SIGNALING_BY_MET	R-HSA-6806834
RTK SIGNALING	REACTOME_SIGNALING_BY_RECEPTOR_TYROSINE_KINASES	R-HSA-9006934
PDGF SIGNALING	REACTOME_SIGNALING_BY_PDGF	R-HSA-186797
ECM DEGRADATION	REACTOME_DEGRADATION_OF_THE_EXTRACELLULAR_MATRIX	R-HSA-1474228
COLLAGEN FORMATION	REACTOME_COLLAGEN_FORMATION	R-HSA-1474290
ECM INTERACTION	REACTOME_NON_INTEGRIN_MEMBRANE_ECM_INTERACTIONS	R-HSA-3000171
ECM PROTEOGLYCANS	REACTOME_ECM_PROTEOGLYCANS	R-HSA-3000178
LAMININ INTERACTIONS	REACTOME_LAMININ_INTERACTIONS	R-HSA-3000157
INTEGRIN INTERACTIONS	REACTOME_INTEGRIN_CELL_SURFACE_INTERACTIONS	R-HSA-216083
EF FORMATION	REACTOME_ELASTIC_FIBRE_FORMATION	R-HSA-1566948
Cacchiarelli et al. 2015
EARLY SOMATIC	Early_Somatic	PMID: 26186193
LATE SOMATIC	Late_Somatic	PMID: 26186194
LATE EMBRYOGENESIS	Late_Embryogenesis	PMID: 26186196
EARLY EMBRYOGENESIS	Early_Embryogenesis	PMID: 26186197
EARLY PLURIPOTENCY	Early_Pluripotency	PMID: 26186200
LATE PLURIPOTENCY	Late_Pluripotency	PMID: 26186201
Naba et al. 2012
MATRISOME	NABA_CORE_MATRISOME	PMID: 22159717
Secretome analysis - Figure 1
SECRETED PROTEINS	SECRETED_PROTEINS

## Sheet: Table S6
Table S6. Positive and significant results of GSEA on SR2 cluster for Common pathways.
Description	p-value	BH-corrected p-value	Enrichment Score (ES)	Normalized Enrichment Score (NES)	leadingEdge gene symbols
HALLMARK_EPITHELIAL_MESENCHYMAL_TRANSITION	0.001873	0.02287	0.673026	2.69505	MMP1,ANPEP,TNFRSF11B,CD44,ECM1,PTX3,NT5E,COL6A2,CXCL1,DCN,PRRX1,LUM,PLAUR,IGFBP4,LOXL1,ITGA2,EMP3,COL6A3,CD59,GLIPR1,LGALS1,VIM,SERPINE2,PDGFRB,COL3A1,JUN,EFEMP2,MYLK,FBLN2,HTRA1,FBLN1,SLIT2,MSX1,CXCL8,TIMP3,GEM,TIMP1,NNMT,SNAI2,NTM,SERPINE1,FBN1,TNC,MMP2,SFRP1,COL1A2,VEGFC,PCOLCE,COL1A1,CTHRC1,CXCL6,ITGA5,FAS,COL5A3,THBS2,AREG,LOX,PLOD1,PLOD3,SGCB,BGN,DAB2,WNT5A,THBS1,GPC1,LRP1,MMP3,GADD45A,DST,…
HALLMARK_TNFA_SIGNALING_VIA_NFKB	0.001862	0.02287	0.666425	2.62538	PLAU,CD44,PTX3,CXCL1,PHLDA2,PLAUR,FOSL1,SPHK1,PHLDA1,CDKN1A,EGR1,SOD2,MAFF,JUN,JUNB,CCL2,IL6ST,CCND1,SERPINB8,ICOSLG,GEM,BTG1,CEBPB,PTGS2,NFKBIA,SERPINE1,FJX1,TNC,FOSB,CXCL6,PPP1R15A,IL1B,PLPP3,DRAM1,AREG,TAP1,EHD1,IER5,PFKFB3,IRF1,MCL1,NINJ1,RELB,GADD45A,IFNGR2,TNIP1,IER3,TANK,DUSP1,MARCKS,DUSP4,RELA,RIPK2,NFKB1,G0S2,MYC,MAP2K3,CSF1,SPSB1,TNFAIP6,SDC4,ICAM1,KLF6,LITAF,IER2,F2RL1,CD83,SQSTM1,RHOB…
HALLMARK_APOPTOSIS	0.001908	0.02287	0.622518	2.39113	CD44,CASP1,DCN,LGALS3,CAV1,HGF,LUM,IGFBP6,EMP1,SLC20A1,LMNA,EREG,TSPO,GSN,CDKN1A,PDGFRB,PLAT,SOD2,H1F0,ANXA1,CASP4,JUN,TIMP2,CCND1,DAP,TIMP3,TIMP1,MMP2,BID,F2R,FAS,CDC25B,IL1B,TAP1,BGN,ISG20,IRF1,MCL1,FEZ1,GADD45A,BNIP3L,PMAIP1,CASP7,IER3,CLU,TNFRSF12A,RELA
HALLMARK_COAGULATION	0.001931	0.02287	0.65781	2.36014	MMP1,PLAU,CTSK,ITGA2,CAPN2,GSN,PRSS23,CTSB,C1R,PLAT,MAFF,ANXA1,HTRA1,C1S,F10,TIMP3,TIMP1,GNG12,ADAM9,SERPINE1,FBN1,MMP2,DPP4,CPQ,DUSP6,CFH,S100A13,C3,THBS1,LRP1,MMP3,SIRT2,LAMP2,CLU,MMP14,CD9,ACOX2
KEGG_COMPLEMENT_AND_COAGULATION_CASCADES	0.002096	0.02287	0.863928	2.3537	PLAU,PLAUR,CD59,MASP1,C1R,PLAT,C1S,F10,TFPI,SERPINE1,BDKRB2,F2R,CFH,C3
KEGG_HEMATOPOIETIC_CELL_LINEAGE	0.00207	0.02287	0.808789	2.32473	ANPEP,CD44,ITGA2,CD59,IL1R1,MME,ITGA5,IL1B,ITGA3,CSF1,CD9,CD55,KITLG,IL4R,IL11RA,IL11
HALLMARK_COMPLEMENT	0.001869	0.02287	0.598578	2.29245	CASP1,CXCL1,LGALS3,PRSS3,PLAUR,PSMB9,CD59,ZEB1,CTSC,CTSB,C1R,PLAT,MAFF,CASP4,TIMP2,SH2B3,C1S,F10,CDH13,TIMP1,ADAM9,CEBPB,SERPINE1,CTSL,DPP4,CPQ,DUSP6,CFH,EHD1,S100A13,IRF1,C3,STX4,LRP1,RHOG,CASP7,LIPA,LAMP2,GNG2,CLU,ERAP2,MMP14,IRF2,ANXA5,CD55,GPD2,DOCK10
HALLMARK_INFLAMMATORY_RESPONSE	0.001934	0.02287	0.616224	2.26948	PLAUR,EMP3,SPHK1,EREG,IL1R1,LPAR1,CDKN1A,CD82,TAPBP,CCL2,TPBG,AXL,CXCL8,ICOSLG,TIMP1,PTGIR,NFKBIA,SERPINE1,CCL7,CXCL6,ITGA5,IL1B,IRF1,LY6E,DCBLD2,RHOG,IFNGR2,AHR,MMP14,RELA,RIPK2,CHST2,NFKB1,OSMR,MYC,IFNAR1,CSF1,TNFAIP6,CD55,ICAM1,KLF6,IL4R
REACTOME_EXTRACELLULAR_MATRIX_ORGANIZATION	0.001855	0.02287	0.559458	2.26467	MMP1,CD44,COL6A2,DCN,COL6A1,LUM,CTSK,LOXL1,ITGA2,COL6A3,CAPN2,LOXL4,CD47,PLEC,CAST,LTBP1,CTSB,COL3A1,EFEMP2,TIMP2,FBLN2,HTRA1,FBLN1,COL15A1,COL13A1,TIMP1,ADAM9,SERPINE1,CTSL,FBN1,TNC,MMP2,P4HA2,COL1A2,PCOLCE,LTBP4,COL1A1,DDR2,LAMA4,COL8A1,ITGA5,COL5A3,EMILIN1,LOXL3,LOX,PLOD1,PLOD3,LAMB1,BGN,CD151,THBS1,ITGA3,MMP3,ADAM15,DST,SH3PXD2A,SDC1,BMP4,EFEMP1,COL16A1,COL18A1,P3H3,MMP14,ITGB1,NID1,ADAMTS2,P…
HALLMARK_INTERFERON_ALPHA_RESPONSE	0.001992	0.02287	0.639362	2.21828	CASP1,PSMB8,PSMB9,CD47,C1S,B2M,PROCR,PSME1,IFI35,UBE2L6,TAP1,IFITM2,ISG20,IRF1,LY6E,PSME2,LGALS3BP,GBP2,OGFR,RIPK2,IRF2,CSF1,SAMD9,NCOA7,MVB12A,LPAR6,IL4R,SAMD9L,TRIM25,PARP14,ELF1,IFI44
GO_ZYMOGEN_ACTIVATION	0.002075	0.02287	0.745703	2.21627	PLAU,PRSS3,ASPH,C1R,SERPINE2,PLAT,IFI16,SERPINE1,CTSZ,PYCARD,THBS1,ANXA2,BAD,MMP14,RIPK2
GO_INFLAMMATORY_RESPONSE	0.001757	0.02287	0.516478	2.19203	CD44,ECM1,ASS1,APOD,PTX3,NT5E,CXCL1,MGLL,CD68,PTGS1,HGF,IGFBP4,ITGA2,SPHK1,IL1R1,CD47,TMEM173,ANXA1,CASP4,JUN,LY96,EGFR,CCL2,IL6ST,IFI16,SERPINF1,AXL,CXCL8,ADGRE5,TIMP1,PTGES,PTGIR,CEBPB,PTGS2,NFKBIA,SERPINE1,PXK,LXN,BDKRB2,TRADD,CCL7,CXCL6,IL10RB,F2R,APPL2,PYCARD,FOXF1,LOXL3,IL1B,GSDMD,NFKBIZ,TNFRSF1A,WNT5A,C3,THBS1,RELB,LRP1,MMP3,CUEDC2,ADAMTS12,PPARG,SDC1,PBK,TNIP1,NFATC4,GRN,LIPA,METRNL,CLU,P…
HALLMARK_INTERFERON_GAMMA_RESPONSE	0.001869	0.02287	0.567478	2.19054	CASP1,MVP,PSMB8,PSMB9,MT2A,ARID5B,CDKN1A,C1R,SOD2,TAPBP,CASP4,VAMP5,CCL2,SSPN,C1S,B2M,BTG1,SECTM1,PTGS2,NFKBIA,PSME1,CCL7,IFI35,UBE2L6,FAS,CFH,TAP1,IFITM2,ISG20,IRF1,LY6E,PSME2,CASP7,LGALS3BP,LYSMD2,OGFR,RIPK2,IRF2,NFKB1,RBCK1,TNFAIP6,ICAM1,ST3GAL5,IL4R,ZNFX1,SAMD9L,TRIM25,NAMPT,OAS3,PARP14,PML,IFI44,BPGM,XAF1,CD40,STAT1
REACTOME_INTERLEUKIN_10_SIGNALING	0.00207	0.02287	0.865866	2.15448	CXCL1,IL1R1,CCL2,CXCL8,TIMP1,PTGS2,IL10RB,IL1B,TNFRSF1A,JAK1,CSF1,ICAM1
GO_CELLULAR_RESPONSE_TO_BIOTIC_STIMULUS	0.001869	0.02287	0.562108	2.15277	ASS1,CASP1,CXCL1,CD68,CAPN2,TSPO,VIM,LY96,CCL2,AXL,CXCL8,ADAM9,CEBPB,TFPI,NFKBIA,SERPINE1,CXCL6,PYCARD,IL1B,SASH1,WNT5A,SIRT2,CARD16,RELA,MEF2C,RIPK2,TICAM1,NFKB1,PRKCA,PDCD4,CD55,ICAM1,MTDH,LITAF,SIRPA,ZFP36,PRKCE,NR1H2,IRAK1,SIGIRR,CD40,PPARD,CXCL3,DDIT3,TNFAIP3,AKT1,MAPK3,BCL10
GO_POSITIVE_REGULATION_OF_PHAGOCYTOSIS	0.002041	0.02287	0.70293	2.12601	PTX3,ITGA2,GAS6,CD47,CCL2,APPL2,PYCARD,IL1B,C3,LRP1,PPARG,SIRPA,GATA2,F2RL1,RAP1A,RAB27A
GO_RESPONSE_TO_MOLECULE_OF_BACTERIAL_ORIGIN	0.001883	0.02287	0.528811	2.11678	ASS1,CASP1,CXCL1,DCN,CD68,LOXL1,CAPN2,TSPO,VIM,JUN,LY96,JUNB,CCL2,B2M,AXL,CXCL8,PTGES,COMT,PTGIR,GNG12,ADAM9,CEBPB,TFPI,PTGS2,NFKBIA,SERPINE1,CXCL6,F2R,PYCARD,IL1B,SASH1,WNT5A,SIRT2,CARD16,RELA,MEF2C,RIPK2,TICAM1,NFKB1,PRKCA,IFNAR1,PDCD4,CD55,ICAM1,MTDH,LITAF,IRAK3,SIRPA,RPS6KA3,SSC5D,ZFP36,SRR,MGST1,PRKCE,FOS,DUSP10,NR1H2,IRAK1,SIGIRR,MAPKAPK3,CD40,ADM,PPARD,CXCL3,TNFAIP3,NFKB2,CARD9,AKT1,MAPK3
REACTOME_INTERFERON_GAMMA_SIGNALING	0.001969	0.02287	0.656516	2.11208	CD44,SP100,MT2A,B2M,GBP3,IRF1,IFNGR2,GBP2,TRIM8,JAK1,IRF2,GBP1,ICAM1,TRIM25,OAS3,PML,TRIM38,CAMK2D,STAT1,TRIM22
GO_CYTOKINE_MEDIATED_SIGNALING_PATHWAY	0.001767	0.02287	0.484705	2.10973	MMP1,TNFRSF11B,CD44,ECM1,CASP1,CXCL1,CAV1,HGF,SP100,PLP2,PSMB8,SPHK1,PSMB9,MT2A,EREG,GAS6,ZEB1,IL1R1,VIM,ACKR4,CDKN1A,EGR1,SOD2,ANXA1,CASP4,JUNB,SLIT2,CCL2,IL6ST,B2M,CCND1,IFI6,AXL,CXCL8,TIMP1,PTGS2,NFKBIA,MMP2,PSME1,COL1A2,TRADD,CCL7,CXCL6,IFI35,IL10RB,APPL2,PYCARD,IL1B,NDN,TNFSF12,IFITM2,TNFRSF1A,ISG20,IRF1,WNT5A,MCL1,STX4,ANXA2,MMP3,CIB1,DOK1,BAD,AGPAT2,IFNGR2,PSME2,SOCS2,PPARG,TNFRSF19,SDC1,G…
KEGG_CYTOKINE_CYTOKINE_RECEPTOR_INTERACTION	0.00198	0.02287	0.589211	2.10583	TNFRSF11B,CXCL1,HGF,IL1R1,PDGFRB,PDGFRA,EGFR,CCL2,IL6ST,CXCL8,VEGFC,CCL7,CXCL6,TGFBR2,IL10RB,FAS,ACVRL1,IL1B,TNFSF12,TNFRSF1A,IFNGR2,TNFRSF19,TNFRSF12A,OSMR,IFNAR1,CSF1,TNFRSF14,KITLG,IL4R,VEGFB,IL19
GO_INTERFERON_GAMMA_MEDIATED_SIGNALING_PATHWAY	0.001976	0.02287	0.655179	2.09571	CD44,SP100,MT2A,B2M,IRF1,IFNGR2,PPARG,GBP2,TRIM8,JAK1,IRF2,GBP1,ICAM1,TRIM25,NR1H2,OAS3,PARP14,PML,TRIM38,CAMK2D,STAT1,TRIM22
GO_PROTEIN_PROCESSING	0.00188	0.02287	0.544494	2.09295	PLAU,CASP1,PRSS3,CAPN2,ASPH,CAST,GSN,MME,C1R,SERPINE2,PLAT,IFI16,ECE1,PRNP,AEBP1,SERPINE1,CTSZ,SRGN,PYCARD,CHAC1,THBS1,ANXA2,TMEM59,CCBE1,BAD,GAS1,CARD16,APH1B,MMP14,RIPK2,ADAMTS2,HM13,HTRA2
GO_LIPOPOLYSACCHARIDE_MEDIATED_SIGNALING_PATHWAY	0.002041	0.02287	0.690132	2.08731	LY96,CCL2,NFKBIA,IL1B,SASH1,CARD16,RIPK2,TICAM1,PRKCA,CD55,MTDH,PRKCE,IRAK1,SIGIRR,TNFAIP3,AKT1,MAPK3,BCL10
REACTOME_ASSEMBLY_OF_COLLAGEN_FIBRILS_AND_OTHER_MULTIMERIC_STRUCTURES	0.001976	0.02287	0.652449	2.08697	COL6A2,COL6A1,LOXL1,COL6A3,LOXL4,PLEC,CTSB,COL3A1,COL15A1,CTSL,COL1A2,PCOLCE,COL1A1,COL8A1,COL5A3,LOXL3,LOX,CD151,MMP3,DST,COL18A1
GO_COMPLEMENT_ACTIVATION	0.00207	0.02287	0.794503	2.07726	CD59,MASP1,C1R,C1S,CFH,C3,SCARA3,CLU,CD55,CD81
REACTOME_COLLAGEN_DEGRADATION	0.001976	0.02287	0.649037	2.07606	MMP1,COL6A2,COL6A1,CTSK,COL6A3,CTSB,COL3A1,COL15A1,COL13A1,ADAM9,CTSL,MMP2,COL1A2,COL1A1,COL8A1,COL5A3,MMP3,COL16A1,COL18A1,MMP14
REACTOME_DEGRADATION_OF_THE_EXTRACELLULAR_MATRIX	0.00198	0.02287	0.580739	2.07555	MMP1,CD44,COL6A2,DCN,COL6A1,CTSK,COL6A3,CAPN2,CAST,CTSB,COL3A1,TIMP2,HTRA1,COL15A1,COL13A1,TIMP1,ADAM9,CTSL,FBN1,MMP2,COL1A2,COL1A1,COL8A1,COL5A3,LAMB1,MMP3,ADAM15,COL16A1,COL18A1,MMP14,NID1
GO_INTERLEUKIN_8_PRODUCTION	0.002075	0.02287	0.693743	2.06185	ANXA1,SERPINE1,F2R,ANXA4,PYCARD,IL1B,WNT5A,MAPKBP1,SSC5D,F2RL1,KLF4,ZNF580,HSPA1A,MAVS,DDIT3,BCL10
REACTOME_NEUTROPHIL_DEGRANULATION	0.001745	0.02287	0.486309	2.05655	ANPEP,PLAU,CD44,PTX3,CXCL1,LGALS3,CD68,MVP,PRSS3,PLAUR,CD59,GLIPR1,DPP7,CD47,TMEM173,CTSC,GSN,CTSB,MME,CST3,TIMP2,CPNE3,B2M,ADGRE5,COMMD3,CAT,SERPINB6,TSPAN14,CTSZ,TMBIM1,PYCARD,PFKL,CYB5R3,QPCT,GSDMD,CKAP4,IMPDH1,S100A11,A1BG,C3,SYNGR1,CTSA,TCIRG1,DNASE1L1,ANXA2,CD63,RHOG,DEGS1,AGPAT2,QSOX1,GRN,LAMP2,PGRMC1,ATG7,DBNL,NFKB1,CEP290,TMEM30A,TNFAIP6,TRAPPC1,CD55,HEXB,AP1M1,CANT1,HGSNAT,RAP1B,CAPN1,S…
GO_WOUND_HEALING	0.00177	0.02287	0.485365	2.05345	PLAU,CD44,APOD,DCN,CAV1,PLAUR,ITGA2,CD59,EREG,GAS6,PLEC,GSN,CDKN1A,SERPINE2,EHD3,PDGFRB,EHD2,PLAT,PDGFRA,COL3A1,MAFF,ANXA1,MYLK,EGFR,FBLN1,ELK3,SH2B3,CD109,F10,PROCR,AXL,TIMP1,TFPI,SERPINE1,TNC,COL1A2,COL1A1,TGFBR2,CPQ,ITGA5,F2R,ACVRL1,RHOC,PLPP3,LOX,EHD1,C1QTNF1,IRF1,MAP3K5,WNT5A,CD151,THBS1,C6orf89,NINJ1,ANXA2,MYOF,DCBLD2,ADAM15,DST,FAP,VKORC1,SDC1,GNG2,ILK,PTEN,GAP43,CLIC1,TNFRSF12A,IRF2,CAPZB…
GO_BONE_GROWTH	0.002075	0.02287	0.683068	2.04624	STC1,ECM1,COL6A2,COL6A1,COL6A3,DDR2,TGFBR2,ANXA2,SCARA3,RARG,BNC2,ANXA6
KEGG_NOD_LIKE_RECEPTOR_SIGNALING_PATHWAY	0.001976	0.02287	0.63928	2.04485	CASP1,CXCL1,CCL2,CXCL8,NFKBIA,CCL7,PYCARD,IL1B,RELA,RIPK2,NFKB1,IKBKG,IKBKB,TNFAIP3,CARD9,MAPK3,BIRC2,TRIP6
GO_REGULATION_OF_EXTRINSIC_APOPTOTIC_SIGNALING_PATHWAY	0.001908	0.02287	0.544382	2.04151	LGALS3,CAV1,HGF,SP100,LMNA,NRP1,SRPX,IFI6,TIMP3,SNAI2,SERPINE1,SFRP1,TRADD,BID,TMBIM1,FAS,PYCARD,IL1B,TNFSF12,MCL1,THBS1,STX4,PMAIP1,BMP4,AR,PTEN,TNFRSF12A,FGFR1,RELA,G0S2,RBCK1,HTRA2,PEA15,ARHGEF2,ICAM1,GPX1,IL19,FYN
GO_DEFENSE_RESPONSE	0.001631	0.02287	0.450482	2.03863	CD44,ECM1,ASS1,APOD,PTX3,NT5E,CASP1,CXCL1,MGLL,LGALS3,CAV1,CD68,PTGS1,HGF,CTSK,IGFBP4,FOSL1,SP100,ITGA2,PSMB8,SPHK1,PSMB9,MT2A,EREG,MASP1,IL1R1,CD47,TMEM173,GSN,VIM,CTSB,EGR1,C1R,OPTN,CST3,ANXA1,CASP4,JUN,LY96,HTRA1,EGFR,CCL2,C1S,IL6ST,IFI16,B2M,IFI6,SERPINF1,AXL,CXCL8,ADGRE5,ICOSLG,TIMP1,PTGES,PTGIR,CDC42EP2,CEBPB,PTGS2,NFKBIA,SERPINE1,PXK,CTSL,LXN,PSME1,BDKRB2,DPP4,TRADD,CCL7,RFTN1,CXCL6,IFI35,…
GO_MYELOID_LEUKOCYTE_ACTIVATION	0.001776	0.02287	0.473057	2.03789	ANPEP,PLAU,CD44,PTX3,CXCL1,LGALS3,CD68,MVP,PRSS3,PLAUR,CD59,GLIPR1,DPP7,CD47,TMEM173,CTSC,GSN,CTSB,MME,CST3,JUN,TIMP2,CPNE3,B2M,CXCL8,ADGRE5,COMMD3,ADAM9,CAT,SERPINB6,TSPAN14,CTSZ,CXCL6,TGFBR2,TMBIM1,PYCARD,PFKL,FOXF1,CYB5R3,QPCT,GSDMD,CKAP4,IMPDH1,S100A11,A1BG,S100A13,RAC2,WNT5A,C3,SYNGR1,THBS1,CTSA,STX4,TCIRG1,RELB,DNASE1L1,ANXA2,CD63,RHOG,DEGS1,AGPAT2,QSOX1,GRN,LAMP2,NDRG1,PGRMC1,VAMP2,CLU,ATG…
GO_CARTILAGE_DEVELOPMENT	0.00189	0.02287	0.531337	2.03376	STC1,CD44,ECM1,COL6A2,PRRX1,COL6A1,LUM,CTSK,COL6A3,ZEB1,MSX1,TIMP1,SNAI2,COL1A1,TGFBR2,ACVRL1,HOXA11,OSR2,WNT5A,ANXA2,ADAMTS12,BMP4,EFEMP1,THRA,SCARA3,RARG,CREB3L2,FGFR1,RELA,MEF2C,HAND2,ANXA6,HMGA2,SHOX2,WNT5B,PITX1
REACTOME_COLLAGEN_FORMATION	0.001988	0.02287	0.601971	2.03332	COL6A2,COL6A1,LOXL1,COL6A3,LOXL4,PLEC,CTSB,COL3A1,COL15A1,COL13A1,CTSL,P4HA2,COL1A2,PCOLCE,COL1A1,COL8A1,COL5A3,LOXL3,LOX,PLOD1,PLOD3,CD151,MMP3,DST,COL16A1,COL18A1,P3H3,ADAMTS2
GO_EXTRACELLULAR_STRUCTURE_ORGANIZATION	0.001812	0.02287	0.488171	2.0331	MMP1,TNFRSF11B,CD44,PTX3,COL6A2,DCN,COL6A1,LUM,CTSK,LOXL1,ITGA2,COL6A3,CAPN2,LOXL4,GAS6,CD47,PDGFRA,COL3A1,CST3,EFEMP2,ENG,TIMP2,FBLN2,HTRA1,FBLN1,COL15A1,COL13A1,TIMP1,AEBP1,SERPINE1,CTSL,FBN1,TNC,MMP2,COL1A2,DPP4,THSD4,COL1A1,DDR2,LAMA4,COL8A1,ITGA5,COL5A3,FOXF1,EMILIN1,LOXL3,LOX,PLOD1,PLOD3,LAMB1,GPM6B,TNFRSF1A,BGN,THBS1,MPV17,LRP1,ANXA2,ITGA3,MMP3,ADAM15,ADAMTSL4,FAP,SH3PXD2A,SDC1,COL16A1,COL…
HALLMARK_IL6_JAK_STAT3_SIGNALING	0.002024	0.02287	0.627227	2.03307	CD44,CXCL1,IL1R1,JUN,IL6ST,CCL7,IL10RB,FAS,ACVRL1,IL1B,TNFRSF1A,IRF1,IFNGR2,TNFRSF12A,OSMR,IFNAR1,CSF1,CD9,IL4R
GO_CONNECTIVE_TISSUE_DEVELOPMENT	0.001869	0.02287	0.509673	2.03295	STC1,CD44,ECM1,COL6A2,PRRX1,COL6A1,LUM,CTSK,COL6A3,ARID5B,ZEB1,EGR1,PDGFRB,MSX1,TIMP1,SNAI2,COL1A1,SLC39A13,TGFBR2,ACVRL1,HOXA11,LOX,OSR2,WNT5A,ANXA2,ADAMTS12,BMP4,EFEMP1,THRA,SCARA3,RARG,CREB3L2,FGFR1,RELA,MEF2C,HAND2,ANXA6,HMGA2,CSF1,SHOX2,WNT5B,PITX1,ACAT1
GO_EXTRACELLULAR_MATRIX_DISASSEMBLY	0.002004	0.02287	0.631182	2.03139	MMP1,CD44,CTSK,CAPN2,CST3,TIMP2,HTRA1,TIMP1,CTSL,MMP2,DPP4,DDR2,LRP1,MMP3,ADAM15,FAP,MMP14,CAPN1,LAMC1,MMP19,SCUBE3
GO_COLLAGEN_CATABOLIC_PROCESS	0.002101	0.02287	0.722967	2.02382	MMP1,CTSK,CTSB,CST3,COL15A1,COL13A1,CTSL,MMP2,MMP3,ADAM15,FAP,MMP14,ITGB1,ADAMTS2,MMP17
GO_MYELOID_LEUKOCYTE_MEDIATED_IMMUNITY	0.001767	0.02287	0.472398	2.02128	ANPEP,PLAU,CD44,PTX3,CXCL1,LGALS3,CD68,MVP,PRSS3,PLAUR,CD59,GLIPR1,DPP7,CD47,TMEM173,CTSC,GSN,CTSB,MME,CST3,TIMP2,CPNE3,B2M,ADGRE5,COMMD3,CAT,SERPINB6,TSPAN14,CTSZ,CXCL6,TMBIM1,PYCARD,PFKL,FOXF1,CYB5R3,QPCT,GSDMD,CKAP4,IMPDH1,S100A11,A1BG,S100A13,RAC2,C3,SYNGR1,CTSA,STX4,TCIRG1,DNASE1L1,ANXA2,CD63,RHOG,DEGS1,AGPAT2,QSOX1,GRN,LAMP2,PGRMC1,VAMP2,ATG7,DBNL,TICAM1,NFKB1,CEP290,TMEM30A,TNFAIP6,TRAPPC1…
GO_REGULATION_OF_PHAGOCYTOSIS	0.001969	0.02287	0.627939	2.02014	PTX3,ITGA2,GAS6,CD47,CCL2,APPL2,PYCARD,IL1B,C3,LRP1,PPARG,PTEN,SIRPA,GATA2,F2RL1,RAP1A,RAB27A,SYT11
GO_RESPONSE_TO_INTERFERON_GAMMA	0.001961	0.02287	0.553517	2.01818	CD44,ASS1,CASP1,SP100,MT2A,CD47,GSN,VIM,CCL2,B2M,CDC42EP2,CCL7,C19orf66,IFITM2,IRF1,WNT5A,STX4,CALCOCO2,IFNGR2,PPARG,GBP2,TRIM8,MYO1C,JAK1,IRF2,GBP1,ICAM1,SIRPA,SEC61A1,TRIM25,NR1H2,OAS3,PARP14,PML,TRIM38,RAB7B,CDC42EP4,CD40,CAMK2D,STAT1,TRIM22,IFITM3,VAMP3,GAPDH,CAMK2G,EVL
GO_NEGATIVE_REGULATION_OF_PROTEIN_MATURATION	0.002083	0.02287	0.775258	1.99557	CAST,SERPINE2,PRNP,SERPINE1,CTSZ,CHAC1,THBS1,TMEM59,GAS1,CARD16
GO_CELL_MATRIX_ADHESION	0.001845	0.02287	0.511233	1.99556	PLAU,CD44,APOD,ITGA2,COL3A1,NRP1,CDH13,COL13A1,ADAM9,SERPINE1,SFRP1,EMP2,DDR2,COL5A3,ACVRL1,SGCE,EMILIN1,SLK,GPM6B,CDKN2A,THBS1,ITGB1BP1,DLC1,NINJ1,LRP1,S100A10,CD63,ITGA3,ADAM15,CIB1,ADAMTS12,COL16A1,PXN,ILK,SLC9A1,PTEN,MMP14,ITGB1,NID1,CSF1,SDC4,ITGBL1,ITGA10,LYPD3,NID2,PPM1F,HOXA7,ARHGAP6,NF1,ACTN1,GREM1,FMN1,SMAD3,FBLN5
GO_COLLAGEN_BIOSYNTHETIC_PROCESS	0.002079	0.02287	0.677817	1.98985	ITGA2,VIM,PDGFRB,TRAM2,ENG,LARP6,COL1A1,F2R,EMILIN1,RCN3,PPARG,BMP4,P3H3,RAP1A,P3H4,PPARD,CREB3L1,COL5A1,CYGB,ERRFI1
GO_REGULATION_OF_LEUKOCYTE_MIGRATION	0.001969	0.02287	0.548559	1.98613	ECM1,APOD,NBL1,LGALS3,ITGA2,GAS6,IL1R1,ANXA1,SLIT2,CCL2,CXCL8,MTUS1,SERPINE1,VEGFC,CCL7,PYCARD,EMILIN1,RAC2,WNT5A,THBS1,DUSP1,MSN,PGF,MMP14,CSF1,TNFRSF14,ICAM1,KITLG,F2RL1,VEGFB
GO_POSITIVE_REGULATION_OF_CALCIUM_ION_TRANSPORT	0.001984	0.02287	0.600276	1.98589	STC1,LGALS3,CAV1,TSPO,EHD3,PDGFRB,MYLK,CCL2,F2R,G6PD,NTSR1,TRPV2,ANXA2,GSTO1,SLC9A1,CACNB3,HSPA2,ORAI1,CEMIP
REACTOME_INTEGRIN_CELL_SURFACE_INTERACTIONS	0.001953	0.02287	0.595534	1.97292	CD44,COL6A2,COL6A1,LUM,ITGA2,COL6A3,CD47,COL3A1,COL13A1,FBN1,TNC,COL1A2,COL1A1,COL8A1,ITGA5,COL5A3,THBS1,ITGA3,COL16A1,COL18A1,ITGB1
GO_HUMORAL_IMMUNE_RESPONSE	0.001992	0.02287	0.57926	1.96886	POU2F2,CXCL1,PRSS3,CD59,MASP1,C1R,CCL2,C1S,CXCL8,CXCL6,CFH,C3,SCARA3,CLU,MEF2C,CD55,CD83,CD81,PDZD11,TFEB,FAM3A,TRAF3IP2,CXCL3,GAPDH,TFE3,SPON2
GO_REGULATION_OF_PROTEIN_MATURATION	0.00404	0.030665	0.635572	1.9681	CAST,GSN,SERPINE2,PRNP,SERPINE1,CTSZ,CHAC1,THBS1,ANXA2,TMEM59,CCBE1,GAS1,CARD16,MMP14
GO_CARTILAGE_MORPHOGENESIS	0.00207	0.02287	0.740616	1.96575	STC1,COL6A2,COL6A1,COL6A3,MSX1,SNAI2,SCARA3,MEF2C,HAND2
GO_RESPONSE_TO_CHEMOKINE	0.002079	0.02287	0.669573	1.96565	CXCL1,ACKR4,SLIT2,CCL2,CXCL8,CCL7,CXCL6,LOX,CIB1,DUSP1
REACTOME_ELASTIC_FIBRE_FORMATION	0.002041	0.02287	0.646039	1.95395	LOXL1,LOXL4,LTBP1,EFEMP2,FBLN2,FBLN1,FBN1,LTBP4,ITGA5,EMILIN1,LOXL3,LOX,BMP4,EFEMP1,ITGB1,LTBP3,MFAP2
GO_CELLULAR_RESPONSE_TO_AMINO_ACID_STIMULUS	0.001969	0.02287	0.59503	1.95044	ASS1,COL6A1,CAPN2,ZEB1,PDGFRA,COL3A1,EGFR,CEBPB,MMP2,COL1A2,COL1A1,RRAGA,COL16A1
GO_POSITIVE_REGULATION_OF_INFLAMMATORY_RESPONSE	0.001972	0.02287	0.592423	1.95028	ITGA2,CD47,EGFR,IL6ST,CEBPB,PTGS2,NFKBIA,SERPINE1,TRADD,IL1B,NFKBIZ,TNFRSF1A,WNT5A,C3,TNIP1,GRN,TICAM1,OSMR,PDCD4
GO_CELL_ACTIVATION_INVOLVED_IN_IMMUNE_RESPONSE	0.001754	0.02287	0.448961	1.95024	ANPEP,PLAU,CD44,PTX3,CXCL1,LGALS3,CD68,MVP,PRSS3,PLAUR,CD59,GLIPR1,DPP7,CD47,TMEM173,CTSC,LGALS1,GSN,CTSB,MME,CST3,ANXA1,TIMP2,APBB1IP,CPNE3,B2M,ADGRE5,COMMD3,ERCC1,CAT,SERPINB6,TSPAN14,CTSZ,TMBIM1,PYCARD,PFKL,FOXF1,LOXL3,CYB5R3,QPCT,GSDMD,CKAP4,NFKBIZ,IMPDH1,S100A11,A1BG,S100A13,RAC2,C3,SYNGR1,CTSA,STX4,TCIRG1,RELB,DNASE1L1,LRP1,ANXA2,CD63,RHOG,DEGS1,AGPAT2,QSOX1,GRN,LAMP2,PGRMC1,VAMP2,ATG7,DBNL…
GO_CELL_SUBSTRATE_ADHESION	0.001866	0.02287	0.474256	1.94853	PLAU,CD44,APOD,ITGA2,GAS6,LGALS1,TRIOBP,COL3A1,NRP1,FBLN2,FBLN1,CDH13,AXL,COL13A1,ADAM9,SERPINE1,SFRP1,EMP2,COL1A1,DDR2,DOCK5,COL8A1,ITGA5,COL5A3,ACVRL1,SGCE,FOXF1,EMILIN1,SLK,LAMB1,GPM6B,PTN,CDKN2A,RAC2,THBS1,ITGB1BP1,DLC1,NINJ1,LRP1,S100A10,CD63,ITGA3,ADAM15,CIB1,ADAMTS12,COL16A1,PXN,ILK,PARVA,SLC9A1,PTEN,MMP14,ITGB1,TNFRSF12A,NID1,RSU1,GBP1,CSF1,SDC4,ITGBL1,ITGA10,LYPD3,SPOCK1,PRKCE,LAMC1,PARV…
HALLMARK_UV_RESPONSE_DN	0.00189	0.02287	0.508226	1.9453	MGLL,CAV1,LTBP1,LPAR1,PDGFRB,COL3A1,NRP1,IGFBP5,ATP2B4,GRK5,SNAI2,TFPI,SERPINE1,COL1A2,COL1A1,TGFBR2,FHL2,KCNMA1,ANXA4,SLC22A18,PLPP3,INSIG1,DAB2,DLC1,NR3C1,RND3,ANXA2,PPARG,EFEMP1,DUSP1,PTEN,NFKB1,SYNJ2,PMP22,MYC,PRKCA,MT1E,FYN,SPOP,SYNE1,PRKCE,LAMC1,NOTCH2,ATP2C1,MGMT,AGGF1,RUNX1,PIK3CD,SMAD3,FBLN5
GO_COAGULATION	0.001912	0.02287	0.48466	1.94135	PLAU,CAV1,PLAUR,ITGA2,CD59,GAS6,SERPINE2,EHD3,EHD2,PLAT,PDGFRA,COL3A1,MAFF,FBLN1,SH2B3,F10,PROCR,AXL,TFPI,SERPINE1,COL1A2,COL1A1,F2R,EHD1,C1QTNF1,IRF1,THBS1,ANXA2,FAP,VKORC1,GNG2,ILK,CLIC1,IRF2,CAPZB,PRKCA,C1GALT1C1,TLN1,ANXA5,CD9,GATA2,F2RL1,UBASH3B,FYN,PRKCE,FIBP,RAB27A,F2RL2,CAPZA1,FLNA,ITPR3,HMG20B,CSRP1,CD40,MICAL1,PIK3CD,PRKAR1A,MAPK3,HSPB1,NFE2L2
BIOCARTA_NFKB_PATHWAY	0.002083	0.02287	0.753998	1.94084	IL1R1,NFKBIA,TRADD,TNFRSF1A,RELA,NFKB1,IKBKG,IKBKB,TNFAIP3
GO_RESPONSE_TO_ORGANOPHOSPHORUS	0.00198	0.02287	0.552593	1.94015	STC1,ASS1,FOSL1,LPAR1,JUN,JUNB,IGFBP5,PTGS2,COL1A1,FOSB,IL1B,AREG,SDC1,LDHA,DUSP1,AHR,PTEN,RELA,TRIM16,RAP1B,FOS,AKR1C1,RAP1A,ZFP36L1,MMP19,STAT1,PANX1
HALLMARK_HYPOXIA	0.001887	0.02287	0.491493	1.93617	STC1,DCN,CAV1,PLAUR,S100A4,MT2A,PAM,GLRX,CDKN1A,SRPX,MAFF,JUN,KDELR3,EGFR,TPBG,BTG1,SERPINE1,LXN,P4HA2,PPP1R15A,PFKL,LOX,PLIN2,EXT1,BGN,ISG20,PFKFB3,TMEM45A,GPC1,NR3C1,ANXA2,BNIP3L,CA12,IER3,LDHA,NDRG1,DUSP1,PGF,CHST2,SELENBP1,GBE1,PRKCA,ANGPTL4,MT1E,SDC4,GALK1,KLF6,AMPD3,ZFP36,HDLBP,FOS,ERO1A,IDS,GAA
REACTOME_INTERLEUKIN_4_AND_INTERLEUKIN_13_SIGNALING	0.001992	0.02287	0.568959	1.93385	MMP1,HGF,ZEB1,VIM,CDKN1A,ANXA1,JUNB,CCL2,CCND1,CXCL8,TIMP1,PTGS2,MMP2,COL1A2,IL1B,NDN,MCL1,MMP3,JAK1,ITGB1,MYC,SOCS5,ICAM1,IL4R,STAT6
GO_OVULATION_CYCLE	0.001957	0.02287	0.608061	1.93305	PTX3,EREG,PAM,EGR1,PDGFRA,EGFR,SLIT2,SERPINF1,AXL,PTN
GO_POSITIVE_REGULATION_OF_PROTEIN_OLIGOMERIZATION	0.002083	0.02287	0.750714	1.93239	MMP1,BID,RHOC,MMP3,PMAIP1,CLU,SNX9,SH3GLB1
GO_POSITIVE_REGULATION_OF_SMOOTH_MUSCLE_CELL_MIGRATION	0.004141	0.030665	0.68263	1.9313	ITGA2,LPAR1,PDGFRB,NRP1,IGFBP5,DOCK5,LRP1,DOCK7,SSH1,MDM2,DOCK4
GO_LEUKOCYTE_MEDIATED_IMMUNITY	0.001757	0.02287	0.44309	1.93104	ANPEP,POU2F2,PLAU,CD44,PTX3,CXCL1,LGALS3,CD68,MVP,PRSS3,PLAUR,CD59,GLIPR1,IL1R1,DPP7,CD47,TMEM173,CTSC,GSN,CTSB,MME,C1R,CST3,TIMP2,C1S,CPNE3,B2M,ADGRE5,COMMD3,ERCC1,CAT,SERPINB6,TSPAN14,EMP2,CTSZ,BTN3A2,RFTN1,CXCL6,TMBIM1,PYCARD,PFKL,FOXF1,IL1B,CYB5R3,QPCT,GSDMD,LYST,CKAP4,IMPDH1,S100A11,A1BG,S100A13,MICA,RAC2,C3,SYNGR1,CTSA,STX4,TCIRG1,DNASE1L1,ANXA2,CD63,RHOG,DEGS1,AGPAT2,HPRT1,QSOX1,GRN,LAMP2,…
GO_POSITIVE_REGULATION_OF_FIBROBLAST_PROLIFERATION	0.004024	0.030665	0.620918	1.93079	S100A6,SPHK1,EREG,GAS6,CDKN1A,PDGFRB,PDGFRA,JUN,EGFR,DDR2,WNT5A,ANXA2,MYC
GO_I_KAPPAB_KINASE_NF_KAPPAB_SIGNALING	0.001912	0.02287	0.481982	1.93062	ECM1,CASP1,S100A4,SLC20A1,WLS,LGALS1,LPAR1,CARD19,OPTN,LY96,SECTM1,NFKBIA,TRADD,F2R,PYCARD,RHOC,IL1B,S100A13,TNFRSF1A,WNT5A,RELB,TMEM9B,TNFRSF19,TNIP1,SLC35B2,CARD16,TANK,MAPKBP1,TRIM8,RELA,RIPK2,TICAM1,NEK6,RBCK1,MTDH,CANT1,IKBKG,TERF2IP,LITAF,SIRPA,F2RL1,IKBKE,FYN,SQSTM1,IFIT5,PRKCE,TRIM25,TMEM101,TIFA,ATP2C1,TRIM38,GOLT1B,FLNA,IRAK1,UBC,CPNE1,CD40,STAT1,TRIM22,TRAF3IP2,IKBKB,MAVS,TNFAIP3,CARD9…
GO_REGULATION_OF_CELL_SUBSTRATE_ADHESION	0.001866	0.02287	0.493587	1.93054	PLAU,APOD,LGALS1,TRIOBP,NRP1,FBLN2,FBLN1,CDH13,SERPINE1,SFRP1,EMP2,COL1A1,DDR2,DOCK5,COL8A1,ITGA5,ACVRL1,FOXF1,EMILIN1,SLK,GPM6B,PTN,CDKN2A,RAC2,THBS1,ITGB1BP1,DLC1,NINJ1,LRP1,S100A10,ITGA3,ADAM15,CIB1,COL16A1,ILK,SLC9A1,PTEN,MMP14,NID1,RSU1,GBP1,CSF1,SDC4,SPOCK1,PRKCE,FLNA,PPM1F,HOXA7,ARHGAP6,NF1,GREM1,FMN1,SMAD3,EMILIN2,MYADM
GO_POSITIVE_REGULATION_OF_I_KAPPAB_KINASE_NF_KAPPAB_SIGNALING	0.001887	0.02287	0.502179	1.92986	ECM1,CASP1,S100A4,SLC20A1,WLS,LGALS1,LPAR1,SECTM1,TRADD,F2R,RHOC,IL1B,S100A13,TNFRSF1A,TMEM9B,TNFRSF19,SLC35B2,CARD16,TRIM8,RELA,RIPK2,TICAM1,NEK6,RBCK1,MTDH,CANT1,IKBKG,TERF2IP,LITAF,F2RL1,IKBKE,FYN,IFIT5,PRKCE,TRIM25,TMEM101,TIFA,ATP2C1,TRIM38,GOLT1B,FLNA,IRAK1,CD40,TRIM22,TRAF3IP2,IKBKB,MAVS,CARD9,AKT1,EDA2R,BCL10,BIRC2,FKBP1A
GO_REGULATION_OF_COAGULATION	0.003968	0.030665	0.60495	1.92703	PLAU,CAV1,PLAUR,SERPINE2,PLAT,PDGFRA,PROCR,TFPI,SERPINE1,F2R,C1QTNF1,THBS1,ANXA2,FAP,PRKCA,ANXA5,CD9,F2RL1,UBASH3B
GO_INTERLEUKIN_6_PRODUCTION	0.001988	0.02287	0.563661	1.92684	HGF,CAPN2,EREG,GAS6,CD47,CEBPB,F2R,PYCARD,IL1B,WNT5A,RIPK2,TICAM1,SOCS5,ARHGEF2,ZBTB20,IRAK3,SIRPA,F2RL1,IL19,SYT11,RAB7B,IL17RC,GBA,MAVS,TNFAIP3,CARD9,BCL10,SPON2,ZC3H12A
GO_RESPONSE_TO_INTERLEUKIN_1	0.001852	0.02287	0.493921	1.92497	PSMB8,PSMB9,IL1R1,CD47,EGR1,ANXA1,CCL2,CXCL8,CEBPB,TFPI,NFKBIA,SFRP1,PSME1,CCL7,GBP3,PYCARD,IL1B,ADAMTS12,PSME2,GBP2,TANK,RELA,RIPK2,NFKB1,GBP1,PRKCA,ICAM1,IKBKG,PSMF1,IRAK3,SIRPA,SQSTM1,PSMD9,RPS6KA4,IRAK1,UBC,CD40,IKBKB
GO_INTERLEUKIN_1_PRODUCTION	0.002008	0.02287	0.595518	1.9188	CASP1,SPHK1,GAS6,EGR1,ANXA1,IFI16,F2R,PYCARD,IL1B,GSDMD,S100A13,WNT5A,CARD16,RIPK2,TRIM16,SIRPA,F2RL1,PML,PANX1,SMAD3,TNFAIP3,HSPB1,ZC3H12A,ERRFI1
GO_REGULATION_OF_WOUND_HEALING	0.001992	0.02287	0.55018	1.91682	PLAU,CAV1,PLAUR,CDKN1A,SERPINE2,PLAT,PDGFRA,ANXA1,MYLK,CD109,TFPI,SERPINE1,TGFBR2,F2R,PLPP3,C1QTNF1,THBS1,ANXA2,FAP,PTEN,TNFRSF12A,PRKCA,ANXA5,CD9,F2RL1,UBASH3B,PRKCE,DUSP10
GO_RESPONSE_TO_BACTERIUM	0.001818	0.02287	0.459638	1.91563	ASS1,CASP1,CXCL1,DCN,CAV1,CD68,LOXL1,CAPN2,TSPO,CD47,VIM,OPTN,JUN,LY96,JUNB,CCL2,B2M,AXL,CXCL8,PTGES,COMT,PTGIR,GNG12,ADAM9,CEBPB,TFPI,PTGS2,NFKBIA,SERPINE1,CXCL6,F2R,PYCARD,IL1B,SASH1,FAM20A,GSDMD,LYST,TNFRSF1A,MICA,WNT5A,C3,SIRT2,GRN,CARD16,MAPKBP1,RELA,MEF2C,RIPK2,TICAM1,NFKB1,PRKCA,IFNAR1,PDCD4,CD55,TNFRSF14,ICAM1,MTDH,PPP1R11,GPX1,LITAF,IRAK3,SIRPA,RPS6KA3,SSC5D,F2RL1,ZFP36,SRR,MGST1,PRKCE,F…
GO_CARTILAGE_DEVELOPMENT_INVOLVED_IN_ENDOCHONDRAL_BONE_MORPHOGENESIS	0.004115	0.030665	0.629413	1.91507	STC1,COL6A2,COL6A1,COL6A3,COL1A1,TGFBR2,HOXA11,ANXA2,SCARA3,RARG,ANXA6,SHOX2
GO_ENDOCHONDRAL_BONE_MORPHOGENESIS	0.001969	0.02287	0.583276	1.91336	STC1,COL6A2,COL6A1,COL6A3,COL13A1,COL1A1,TGFBR2,HOXA11,ANXA2,BMP4,SCARA3,RARG,MMP14,MEF2C,ANXA6,NAB2,SHOX2
KEGG_FOCAL_ADHESION	0.001898	0.02287	0.489326	1.91103	COL6A2,CAV1,HGF,COL6A1,ITGA2,COL6A3,CAPN2,CAV2,PDGFRB,PDGFRA,COL3A1,JUN,MYLK,EGFR,CCND1,TNC,COL1A2,VEGFC,COL1A1,LAMA4,ITGA5,COL5A3,THBS2,LAMB1,RAC2,THBS1,ITGA3,BAD,PXN,ILK,PARVA,PGF,PTEN,ITGB1,PRKCA,TLN1,RAP1B,CCND3,VEGFB,ITGA10,FYN,LAMC1,PARVB,RAP1A,FLNA,HRAS,ACTN1,PIK3CD,MYL5,SHC1,AKT1,MAPK3,PIP5K1C,ARHGAP35,BIRC2
GO_REGULATION_OF_PEPTIDASE_ACTIVITY	0.001832	0.02287	0.460268	1.90887	CD44,ECM1,CASP1,CAV1,HGF,PLAUR,COL6A3,PSMB8,PSMB9,ASPH,GAS6,CAST,GSN,SERPINE2,CST3,CASP4,TIMP2,FBLN1,IFI16,CD109,IFI6,SERPINF1,SERPINB8,DAP,TIMP3,TIMP1,TFPI,PTGS2,SERPINE1,ARL6IP5,LXN,PSME1,SERPINB6,PCOLCE,TRADD,IFT57,CRYAB,BID,F2R,FAS,PYCARD,MAP3K5,C3,THBS1,DLC1,RCN3,BAD,HMSD,PMAIP1,PSME2,PPARG,GRN,CARD16,TANK
REACTOME_ANTIGEN_PRESENTATION:_FOLDING_ASSEMBLY_AND_PEPTIDE_LOADING_OF_CLASS_I_MHC	0.00207	0.02287	0.729398	1.90704	TAPBP,B2M,TAP1,ERAP2,SEC31A,SEC24D,SEC23A,SAR1B,TAP2,HSPA5,SEC13,CALR,ERAP1
GO_REGULATION_OF_INFLAMMATORY_RESPONSE	0.001862	0.02287	0.480213	1.90616	APOD,NT5E,MGLL,HGF,ITGA2,IL1R1,CD47,TMEM173,ANXA1,EGFR,IL6ST,SERPINF1,CEBPB,PTGS2,NFKBIA,SERPINE1,TRADD,APPL2,PYCARD,FOXF1,IL1B,NFKBIZ,TNFRSF1A,WNT5A,C3,MMP3,CUEDC2,ADAMTS12,PPARG,PBK,TNIP1,GRN,METRNL,RELA,TICAM1,NFKB1,OSMR,PDCD4,SOCS5,TNFAIP6,GPX1,SIRPA,MVK,KLF4,RB1,DUSP10
GO_CELL_SUBSTRATE_JUNCTION_ASSEMBLY	0.002037	0.02287	0.550898	1.90409	APOD,ITGA2,PLEC,NRP1,SFRP1,ITGA5,ACVRL1,SLK,GPM6B,CD151,THBS1,ITGB1BP1,DLC1,LRP1,S100A10,DST,COL16A1,SLC9A1,PTEN,MMP14,TLN1,SDC4,LAMC1,PPM1F,TNS1,ARHGAP6,ACTN1,GREM1,FMN1,SMAD3,CTTN,RHOD,TRIP6,ROCK1,ABL1,CORO1C
REACTOME_ECM_PROTEOGLYCANS	0.002004	0.02287	0.591473	1.90359	COL6A2,DCN,COL6A1,LUM,ITGA2,COL6A3,COL3A1,SERPINE1,TNC,COL1A2,COL1A1,LAMA4,COL5A3,LAMB1,BGN
GO_GROWTH_PLATE_CARTILAGE_DEVELOPMENT	0.004149	0.030665	0.664981	1.90295	STC1,COL6A2,COL6A1,COL6A3,TGFBR2,ANXA2,SCARA3,RARG,ANXA6
REACTOME_DISEASES_OF_IMMUNE_SYSTEM	0.002096	0.02287	0.774809	1.89982	LY96,NFKBIA,RELA,TICAM1,NFKB1,IKBKG,TRAF3,IKBKB,NFKB2,UNC93B1
GO_RESPONSE_TO_CYTOKINE	0.001661	0.02287	0.422493	1.89885	MMP1,TNFRSF11B,CD44,ECM1,ASS1,CASP1,CXCL1,CAV1,HGF,FOSL1,SP100,PLP2,PSMB8,SPHK1,PSMB9,CAPN2,MT2A,PID1,ARID5B,EREG,GAS6,ZEB1,IL1R1,CD47,TMEM173,GSN,VIM,MME,ACKR4,CDKN1A,EGR1,COL3A1,SOD2,ANXA1,CASP4,JUN,JUNB,TIMP2,SLIT2,CCL2,IL6ST,IFI16,B2M,CCND1,IFI6,AXL,CXCL8,TIMP3,TIMP1,PTGES,ADAM9,CDC42EP2,CEBPB,TFPI,PTGS2,NFKBIA,MMP2,SFRP1,PSME1,COL1A2,VEGFC,PCOLCE,TRADD,COL1A1,CCL7,PMM1,ZFP36L2,CXCL6,IFI35,GB…
GO_REGULATION_OF_RESPONSE_TO_EXTERNAL_STIMULUS	0.001736	0.02287	0.435851	1.89714	PLAU,APOD,NBL1,NT5E,MGLL,CAV1,HGF,PLAUR,ITGA2,GAS6,IL1R1,CD47,TMEM173,LPAR1,CDKN1A,SERPINE2,PDGFRB,PLAT,PDGFRA,OPTN,NRP1,ANXA1,LY96,HTRA1,NUCB2,EGFR,SLIT2,CCL2,IL6ST,CD109,CDH13,SERPINF1,CXCL8,MTUS1,SNAI2,CEBPB,TFPI,PTGS2,NFKBIA,SERPINE1,VEGFC,TRADD,CCL7,CXCL6,TGFBR2,F2R,APPL2,NENF,PYCARD,FOXF1,IL1B,SASH1,NFKBIZ,MYCBP2,TNFRSF1A,C1QTNF1,RAC2,WNT5A,C3,THBS1,STX4,LRP1,ANXA2,MMP3,CUEDC2,FAP,ADAMTS12,…
GO_RESPONSE_TO_TUMOR_NECROSIS_FACTOR	0.001901	0.02287	0.472011	1.89362	TNFRSF11B,ASS1,CASP1,PSMB8,SPHK1,PSMB9,PID1,GAS6,CASP4,CCL2,CXCL8,ADAM9,PTGS2,NFKBIA,SFRP1,PSME1,TRADD,COL1A1,CCL7,ZFP36L2,GBP3,PYCARD,TNFSF12,TNFRSF1A,MAP3K5,THBS1,CIB1,ADAMTS12,PSME2,TNFRSF19,GBP2,CARD16,TANK,ILK,TNFRSF12A,RELA,NFKB1,GBP1,RBCK1,GSS,ARHGEF2,TNFRSF14,ICAM1,IKBKG,PSMF1,F2RL1,ZFP36,PSMD9,ZFP36L1,CPNE1,CD40,STAT1,TRAF3,HSPA1A,IKBKB,GBA,TNFAIP3,AKT1,MAPK3,EDA2R,NFE2L2,BIRC2
GO_EXTRACELLULAR_MATRIX_ASSEMBLY	0.002083	0.02287	0.734653	1.89105	GAS6,EFEMP2,COL1A2,THSD4,EMILIN1,LOX,GPM6B,SMAD3,FBLN5,MFAP4
GO_RESPONSE_TO_WOUNDING	0.001764	0.02287	0.438404	1.89034	PLAU,CD44,APOD,DCN,CAV1,PLAUR,ITGA2,CD59,EREG,TSPO,GAS6,PLEC,LGALS1,GSN,CDKN1A,SERPINE2,EHD3,PDGFRB,EHD2,PLAT,PDGFRA,COL3A1,NRP1,MAFF,ANXA1,JUN,MYLK,EGFR,FBLN1,ELK3,SH2B3,CD109,F10,PROCR,AXL,TIMP1,TFPI,SERPINE1,TNC,COL1A2,COL1A1,ZFP36L2,TGFBR2,CPQ,ITGA5,F2R,ACVRL1,RHOC,FOXF1,PLPP3,LOX,EHD1,C1QTNF1,IRF1,MAP3K5,WNT5A,CD151,THBS1,C6orf89,NINJ1,LRP1,ANXA2,MYOF,DCBLD2,ADAM15,DST,FAP,HHEX,VKORC1,SDC1,G…
GO_REGULATION_OF_CELL_MATRIX_ADHESION	0.001931	0.02287	0.525778	1.88642	PLAU,APOD,NRP1,CDH13,SERPINE1,SFRP1,EMP2,DDR2,ACVRL1,SLK,GPM6B,CDKN2A,THBS1,ITGB1BP1,DLC1,NINJ1,LRP1,S100A10,ADAM15,CIB1,COL16A1,ILK,SLC9A1,PTEN,MMP14,CSF1,SDC4,PPM1F,HOXA7,ARHGAP6,NF1,GREM1,FMN1,SMAD3
GO_NEGATIVE_REGULATION_OF_RESPONSE_TO_EXTERNAL_STIMULUS	0.001873	0.02287	0.467631	1.88516	PLAU,APOD,NBL1,NT5E,HGF,PLAUR,CDKN1A,SERPINE2,PLAT,PDGFRA,NRP1,HTRA1,NUCB2,SLIT2,CCL2,CD109,SERPINF1,SNAI2,TFPI,SERPINE1,APPL2,NENF,PYCARD,FOXF1,TNFRSF1A,C1QTNF1,WNT5A,THBS1,ANXA2,CUEDC2,FAP,PPARG,SIRT2,KANK2,PBK,GRN,CARD16,METRNL,DUSP1,MAPKBP1,PTEN,NFKB1,PDCD4,ANXA5,SOCS5,CD9,TNFAIP6,GPX1,SIRPA,CACNB3,MVK,UBASH3B,KLF4,RB1,DUSP10,TRIM38,FNDC4,SEMA5A,SIGIRR,FAM3A,PPARD,PPARA,GBA,GREM1,SMAD3,TNFAIP3
GO_EMBRYONIC_FORELIMB_MORPHOGENESIS	0.002096	0.02287	0.701497	1.88458	TBX3,MSX1,CRABP2,HOXA11,OSR2,TBX5,TFAP2A,HOXA9,SHOX2
REACTOME_INNATE_IMMUNE_SYSTEM	0.001669	0.02287	0.421056	1.88275	ANPEP,PLAU,CD44,PTX3,CASP1,CXCL1,LGALS3,CD68,MVP,PRSS3,PLAUR,CTSK,PSMB8,PSMB9,CD59,GLIPR1,MASP1,DPP7,CD47,TMEM173,CTSC,GSN,CTSB,MME,C1R,CST3,CASP4,JUN,LY96,TIMP2,C1S,IFI16,CPNE3,B2M,ADGRE5,COMMD3,CAT,NFKBIA,CTSL,PSME1,SERPINB6,TSPAN14,CTSZ,POLR3GL,DUSP7,UBE2L6,TMBIM1,PYCARD,PFKL,IL1B,CYB5R3,DUSP6,CFH,QPCT,GSDMD,CKAP4,IMPDH1,S100A11,ARPC1B,A1BG,RAC2,C3,SYNGR1,CTSA,TCIRG1,RELB,DNASE1L1,ANXA2,CD63,R…
GO_RESPONSE_TO_CAMP	0.001972	0.02287	0.56729	1.88213	STC1,ASS1,FOSL1,JUN,JUNB,IGFBP5,COL1A1,FOSB,AREG,SDC1,LDHA,DUSP1,AHR,RELA,RAP1B,FOS,RAP1A,ZFP36L1,MMP19
GO_CHEMOKINE_PRODUCTION	0.003914	0.030665	0.591543	1.88054	APOD,EGR1,SNAI2,CXCL6,PYCARD,IL1B,WNT5A,LRP1,RIPK2,TICAM1,SOCS5,SIRPA,IL4R,F2RL1,KLF4,SIGIRR,MAVS
GO_POSITIVE_REGULATION_OF_INTERLEUKIN_8_PRODUCTION	0.004132	0.030665	0.701271	1.8802	SERPINE1,F2R,PYCARD,IL1B,WNT5A,F2RL1,ZNF580,HSPA1A,MAVS,DDIT3,BCL10
BIOCARTA_KERATINOCYTE_PATHWAY	0.004115	0.030665	0.617503	1.87884	JUN,EGFR,NFKBIA,FAS,TNFRSF1A,MAP3K5,RELA,NFKB1,MAP2K3,PRKCA,PRKCE,FOS,ETS2,DAXX,HOXA7,HRAS,IKBKB,MAPK3
GO_RESPONSE_TO_FLUID_SHEAR_STRESS	0.004149	0.030665	0.656121	1.87759	ASS1,PDGFRB,ADAM9,PTGS2,MEF2C,SOCS5,KLF4,AKT1,NFE2L2
GO_CELLULAR_DEFENSE_RESPONSE	0.004193	0.030665	0.765412	1.87678	FOSL1,LY96,TCIRG1,LGALS3BP,ITGB1,RELA,ZNF148,BCL10
GO_RESPONSE_TO_ESTRADIOL	0.00198	0.02287	0.533419	1.87544	ASS1,ITGA2,PAM,NR2F2,FAM210B,PDGFRB,ANXA1,EGFR,CCND1,NQO1,TFPI,PTGS2,CAT,SFRP1,COL1A1,CRYAB,AREG,ARPC1B,PTN,BAD,SOCS2,DUSP1,PTEN,MBD2
GO_BLOOD_VESSEL_MORPHOGENESIS	0.001789	0.02287	0.435298	1.87496	ANPEP,ECM1,APOD,DCN,PRRX1,CAV1,HGF,ARHGAP22,SP100,SPHK1,EREG,ENPP2,NR2F2,ARHGAP24,PDGFRB,RRAS,PDGFRA,COL3A1,HSPB6,NRP1,FAM129B,ANXA1,JUN,JUNB,MYLK,ENG,SLIT2,CCL2,ELK3,COL15A1,CDH13,SERPINF1,GPNMB,CXCL8,BTG1,TYMP,RNH1,PTGS2,TBX2,SERPINE1,MMP2,SFRP1,EPAS1,VEGFC,EMP2,DLL4,TGFBR2,COL8A1,ITGA5,ACVRL1,CSPG4,FOXF1,EMILIN1,THBS2,IL1B,SASH1,LOX,TNFSF12,TBX5,PTN,WNT5A,C3,THBS1,ITGB1BP1,LRP1,ANXA2,ADAM15,CI…
GO_POSITIVE_CHEMOTAXIS	0.004024	0.030665	0.598676	1.87455	LGALS3,HGF,ITGA2,NRP1,CDH13,GPNMB,CXCL8,VEGFC,ROBO3,WNT5A,LRP1,BMP4,PGF,F2RL1,VEGFB,SEMA5A,GDNF,SMAD3,NTF3
GO_NEUROTRANSMITTER_BIOSYNTHETIC_PROCESS	0.004049	0.030665	0.577815	1.87291	ASS1,PTX3,CAV1,MOXD1,TSPO,CD47,ATP2B4,NQO1,PTGS2,IL1B,CLU,TICAM1,ICAM1,SIRPA,DPYD,KLF4
GO_REGULATION_OF_REACTIVE_OXYGEN_SPECIES_BIOSYNTHETIC_PROCESS	0.001969	0.02287	0.571047	1.87182	ASS1,PTX3,CAV1,TSPO,CD47,ATP2B4,PTGS2,IL1B,CLU,TICAM1,ICAM1,SIRPA,FYN,KLF4,RAB27A
GO_REGULATION_OF_EXTRINSIC_APOPTOTIC_SIGNALING_PATHWAY_VIA_DEATH_DOMAIN_RECEPTORS	0.003914	0.030665	0.588768	1.87172	LGALS3,HGF,SP100,TIMP3,SERPINE1,SFRP1,TRADD,TMBIM1,FAS,THBS1,STX4,PMAIP1,PTEN,PEA15,ARHGEF2,ICAM1,GPX1
GO_REACTIVE_OXYGEN_SPECIES_METABOLIC_PROCESS	0.001949	0.02287	0.509391	1.87157	SOD3,PID1,TSPO,CDKN1A,PDGFRB,SOD2,EGFR,IFI6,NQO1,STK17A,CRYAB,TGFBR2,G6PD,RAC2,THBS1,MPV17,MMP3,GADD45A,PMAIP1,SH3PXD2A,SIRT2,TFAP2A,PLA2R1,F2RL1,IL19,NDUFAF2
GO_POSITIVE_REGULATION_OF_RESPONSE_TO_EXTERNAL_STIMULUS	0.001866	0.02287	0.477747	1.87132	ITGA2,GAS6,CD47,LPAR1,PDGFRB,OPTN,NRP1,LY96,EGFR,SLIT2,IL6ST,CDH13,CXCL8,CEBPB,PTGS2,NFKBIA,SERPINE1,VEGFC,TRADD,CCL7,IL1B,SASH1,NFKBIZ,TNFRSF1A,RAC2,WNT5A,C3,THBS1,STX4,LRP1,TNIP1,GRN,PGF,FGFR1,RIPK2,TICAM1,OSMR,PRKCA,CSF1,PDCD4
GO_RESPONSE_TO_OSMOTIC_STRESS	0.003968	0.030665	0.572915	1.86998	ITGA2,TSPO,MYLK,EGFR,AKR1B1,ICOSLG,PTGS2,SERPINB6,BDKRB2,KCNMA1,RELB,BAD,PLK3,TSC22D4,LRRC8C,ARHGEF2
GO_EXTRINSIC_APOPTOTIC_SIGNALING_PATHWAY_VIA_DEATH_DOMAIN_RECEPTORS	0.003914	0.030665	0.553926	1.86809	LGALS3,HGF,SP100,TIMP3,SERPINE1,SFRP1,TRADD,BID,TMBIM1,FAS,TNFRSF1A,THBS1,STX4,BAD,PMAIP1,BAG3,PTEN,CRADD,PEA15,ARHGEF2,ICAM1,GPX1,GABARAP
GO_EXOCYTOSIS	0.001701	0.02287	0.42073	1.86755	ANPEP,PLAU,CD44,ECM1,PTX3,CXCL1,LGALS3,CD68,HGF,MVP,PRSS3,PLAUR,CD59,GLIPR1,GAS6,DPP7,CD47,TMEM173,CTSC,GSN,CTSB,MME,CST3,ANXA1,TIMP2,CPNE3,CD109,B2M,ADGRE5,COMMD3,TIMP3,TIMP1,CAT,SERPINE1,SERPINB6,TSPAN14,STXBP6,VEGFC,CTSZ,SRGN,TMBIM1,TAGLN2,PYCARD,PFKL,FOXF1,CYB5R3,QPCT,GSDMD,CKAP4,IMPDH1,S100A11,TEX264,A1BG,S100A13,RAC2,C3,SYNGR1,THBS1,CTSA,STX4,TCIRG1,RALB,DNASE1L1,SCFD2,ANXA2,CD63,RHOG,DEGS1…
REACTOME_PLATELET_ACTIVATION_SIGNALING_AND_AGGREGATION	0.001869	0.02287	0.468065	1.86699	ECM1,MGLL,HGF,GNG11,GAS6,APBB1IP,CD109,TIMP3,TIMP1,GNG12,SERPINE1,COL1A2,VEGFC,COL1A1,SRGN,F2R,TAGLN2,TEX264,A1BG,RAC2,THBS1,STX4,CD63,RHOG,ISLR,LGALS3BP,QSOX1,LAMP2,GNG2,CLU,PRKCA,TLN1,ANXA5,CD9,CYB5R1,RAP1B,TMX3,SCCPDH,VEGFB,FYN,RHOB,PRKCE,GNB2,APLP2,RAP1A,F2RL2,TOR4A,GNAI2,FLNA,ITPR3
GO_ENDOPLASMIC_RETICULUM_TO_GOLGI_VESICLE_MEDIATED_TRANSPORT	0.001866	0.02287	0.469534	1.86678	CD59,GAS6,CTSC,KDELR3,COPZ2,F10,CTSZ,DCTN3,CNIH3,AREG,INSIG1,BCAP29,ANKRD28,GAS1,CREB3L2,CAPZB,COPG1,TMED3,LMF1,TRAPPC1,CD55,ERGIC1,ARFGAP3,SEC31A,ERGIC3,SEC24D,SEC23A,SAR1B,MCFD2,CAPZA1,COPB2,IER3IP1,KDELR2,TMED7,DCTN2,TMED10,TEX261,DCTN6,CSNK1D,YIPF5,TRAPPC3,ERGIC2,ANK1,CNIH1,TMEM115,DYNC1I2,STX18,PDCD6,STX5,TMED5,SEC13,GRIA1,COG1,ACTR1A,SEC22B,TRAPPC12,RAB1B,VAPA,DYNC1H1,SEC22A,CAPZA2,TMED1,AC…
GO_IMMUNE_EFFECTOR_PROCESS	0.001678	0.02287	0.416915	1.86585	ANPEP,POU2F2,PLAU,CD44,PTX3,CXCL1,LGALS3,CD68,MVP,PRSS3,PLAUR,CD59,GLIPR1,MASP1,IL1R1,DPP7,CD47,TMEM173,CTSC,LGALS1,GSN,CTSB,MME,C1R,CST3,ANXA1,TIMP2,HTRA1,C1S,IFI16,APBB1IP,CPNE3,B2M,IFI6,ADGRE5,COMMD3,ERCC1,CAT,SERPINB6,TSPAN14,EMP2,CTSZ,BTN3A2,RFTN1,CXCL6,GBP3,IL10RB,TMBIM1,APPL2,PYCARD,PFKL,FOXF1,LOXL3,IL1B,CYB5R3,C19orf66,CFH,QPCT,GSDMD,LYST,CKAP4,IFITM2,NFKBIZ,IMPDH1,S100A11,ARPC1B,A1BG,S10…
GO_REGULATION_OF_LIPOPOLYSACCHARIDE_MEDIATED_SIGNALING_PATHWAY	0.004141	0.030665	0.749547	1.86505	LY96,SASH1,CARD16,PRKCA,CD55,SIGIRR,TNFAIP3
GO_CARDIOVASCULAR_SYSTEM_DEVELOPMENT	0.001704	0.02287	0.424409	1.86471	ANPEP,ECM1,APOD,DCN,PRRX1,CAV1,HGF,TBX3,ARHGAP22,FOSL1,LOXL1,SP100,SPHK1,EREG,ENPP2,NR2F2,LTBP1,EGR1,ARHGAP24,PDGFRB,RRAS,PDGFRA,COL3A1,HSPB6,SOD2,NRP1,FAM129B,ANXA1,JUN,JUNB,MYLK,ENG,SLIT2,CCL2,ELK3,COL15A1,CDH13,SERPINF1,GPNMB,CXCL8,BTG1,TYMP,ADAMTS6,RNH1,PTGS2,TBX2,SERPINE1,MMP2,SFRP1,EPAS1,COL1A2,VEGFC,EMP2,DLL4,COL1A1,TGFBR2,COL8A1,ITGA5,ACVRL1,CSPG4,FOXF1,EMILIN1,THBS2,IL1B,SASH1,LOX,TNFSF1…
GO_FORELIMB_MORPHOGENESIS	0.004175	0.030665	0.671749	1.86393	TBX3,MSX1,CRABP2,HOXA11,OSR2,TBX5,TFAP2A,HOXA9,SHOX2,FMN1,OSR1
BIOCARTA_RACCYCD_PATHWAY	0.004202	0.030665	0.665594	1.86321	CDKN1A,CCND1,NFKBIA,RELA,NFKB1,IKBKG,RB1,TFDP1,HRAS,IKBKB,AKT1,MAPK3
GO_TISSUE_REMODELING	0.001969	0.02287	0.515383	1.86221	TNFRSF11B,CAV1,CTSK,CST3,ANXA1,EGFR,GPNMB,IGFBP5,AXL,TIMP1,MMP2,SFRP1,EPAS1,DLL4,CTHRC1,F2R,TMBIM1,ACVRL1,CSPG4,BGN,RAC2,LIPA,MMP14,MEF2C,HAND2,PRKCA,CAPN1,TPP1,UBASH3B
REACTOME_REGULATION_OF_INSULIN_LIKE_GROWTH_FACTOR_IGF_TRANSPORT_AND_UPTAKE_BY_INSULIN_LIKE_GROWTH_FACTOR_BINDING_PROTEINS_IGFBPS	0.002004	0.02287	0.535951	1.85925	MMP1,IGFBP4,IGFBP6,GAS6,LGALS1,LTBP1,PRSS23,CST3,EVA1A,IGFBP5,TIMP1,FBN1,TNC,MMP2,PAPPA,FAM20A,IGFBP7,LAMB1,CKAP4,C3,BMP4,FAM20C,QSOX1,MXRA8,TGOLN2,CSF1
GO_SNARE_COMPLEX_ASSEMBLY	0.002083	0.02287	0.721085	1.85612	STXBP6,VAMP4,STX4,STX1A,VPS16,SEPT8,VAMP3,PRRT2
GO_POSITIVE_REGULATION_OF_EXTRINSIC_APOPTOTIC_SIGNALING_PATHWAY	0.00404	0.030665	0.598895	1.85453	CAV1,SRPX,TIMP3,SFRP1,BID,PYCARD,TNFSF12,THBS1,PMAIP1,PTEN,TNFRSF12A,G0S2,RBCK1,HTRA2,PEA15
GO_RESPONSE_TO_MECHANICAL_STIMULUS	0.00188	0.02287	0.481987	1.85268	CASP1,DCN,FOSL1,ITGA2,SERPINE2,COL3A1,JUN,JUNB,ENG,EGFR,USP53,PTGS2,NFKBIA,TNC,COL1A1,FOSB,TGFBR2,FAS,XPC,IL1B,TNFRSF1A,IRF1,THBS1,GADD45A,BAD,PPARG,PIEZO1,BAG3,SLC9A1,MMP14,RELA,MBD2,NFKB1,CRADD,LRP11,XPA,CACNB3,MTPN,FYN,STRA6,FOS,ETV1
GO_INNATE_IMMUNE_RESPONSE	0.001739	0.02287	0.423619	1.85198	CD44,ASS1,PTX3,CASP1,LGALS3,CAV1,CTSK,SP100,PSMB8,PSMB9,MT2A,EREG,MASP1,CD47,TMEM173,GSN,VIM,CTSB,EGR1,C1R,OPTN,ANXA1,CASP4,LY96,CCL2,C1S,IFI16,B2M,IFI6,AXL,CDC42EP2,NFKBIA,CTSL,PSME1,CCL7,RFTN1,IFI35,APPL2,PYCARD,C19orf66,CFH,GSDMD,LYST,IFITM2,ISG20,MICA,IRF1,MAP3K5,WNT5A,C3,COLEC12,STX4,RELB,CALCOCO2,ADAM15,RTN4,IFNGR2,PSME2,PPARG,SIRT2,TNIP1,GBP2,APOBEC3C,GRN,TANK,SCARA3,CLU,TRIM8,PRDM1,ARID5A…
KEGG_ECM_RECEPTOR_INTERACTION	0.003937	0.030665	0.564477	1.85169	CD44,COL6A2,COL6A1,ITGA2,COL6A3,CD47,COL3A1,TNC,COL1A2,COL1A1,LAMA4,ITGA5,COL5A3,THBS2,LAMB1,THBS1,ITGA3,SDC1,ITGB1
REACTOME_CARGO_CONCENTRATION_IN_THE_ER	0.004141	0.030665	0.654375	1.85136	CD59,CTSC,CTSZ,CNIH3,AREG,SEC24D,SEC23A,SAR1B,MCFD2,TMED10,CNIH1,STX5,GRIA1,SEC22B
GO_REGULATION_OF_CELL_JUNCTION_ASSEMBLY	0.002008	0.02287	0.538523	1.85055	APOD,CAV1,NRP1,SNAI2,SFRP1,ACVRL1,SLK,GPM6B,THBS1,ITGB1BP1,DLC1,LRP1,S100A10,COL16A1,SLC9A1,MYO1C,PTEN,MMP14,SDC4,RAP1B,RAP1A,PPM1F,ARHGAP6,RUNX1,IKBKB,GREM1,FMN1,SMAD3,FLOT1,RHOD,ROCK1,ABL1,CORO1C,MAP4K4,PRKACA,VEGFA
GO_INTERLEUKIN_1_BETA_PRODUCTION	0.003968	0.030665	0.580867	1.85032	CASP1,SPHK1,EGR1,IFI16,F2R,PYCARD,IL1B,GSDMD,WNT5A,CARD16,RIPK2,TRIM16,SIRPA,F2RL1,PML,PANX1,SMAD3,TNFAIP3,HSPB1,ZC3H12A,ERRFI1,MR1,NLRP1
GO_REGULATION_OF_PROTEIN_DEPOLYMERIZATION	0.003937	0.030665	0.563671	1.84905	ASPH,GSN,TRIOBP,MAP1A,CFL2,TWF2,EPS8,STMN2,LIMA1,TMOD3,CIB1,CAPG,NAV3,TWF1,CAPZB,NES,ARHGEF2,F2RL1,MTPN,CAPZA1,DSTN,SEMA5A
GO_REGULATION_OF_ADHERENS_JUNCTION_ORGANIZATION	0.001953	0.02287	0.557863	1.84812	APOD,NRP1,SFRP1,ACVRL1,SLK,GPM6B,THBS1,ITGB1BP1,DLC1,LRP1,S100A10,COL16A1,SLC9A1,PTEN,MMP14,SDC4,PPM1F,ARHGAP6,GREM1,FMN1,SMAD3,RHOD,ROCK1,ARF6,ABL1,CORO1C,MAP4K4,VEGFA
GO_LEUKOCYTE_CELL_CELL_ADHESION	0.001842	0.02287	0.461511	1.84693	CD44,ASS1,NT5E,LGALS3,CAV1,CD47,LGALS1,ANXA1,CCL2,IL6ST,PRNP,GPNMB,ICOSLG,CEBPB,CERCAM,DPP4,TGFBR2,ITGA5,PYCARD,LOXL3,IL1B,TWSG1,NFKBIZ,IRF1,RAC2,BAD,BMP4,TNIP1,MSN,ITGB1,RELA,RIPK2,SOCS5,PAG1,CD55,TNFRSF14,SDC4,ICAM1,SIRPA,IL4R,CD83,FYN,KLF4,DUSP10,MAD1L1
GO_CELL_ACTIVATION	0.001621	0.02287	0.408539	1.84692	ANPEP,POU2F2,PLAU,CD44,PTX3,CXCL1,LGALS3,CAV1,CD68,MVP,PRSS3,PLAUR,CD59,GLIPR1,GAS6,ZEB1,DPP7,CD47,TMEM173,CTSC,LGALS1,GSN,CTSB,MME,EGR1,SERPINE2,PDGFRB,PDGFRA,COL3A1,CST3,ANXA1,JUN,TIMP2,EGFR,CCL2,IL6ST,APBB1IP,CPNE3,B2M,PRNP,GPNMB,AXL,CXCL8,ADGRE5,COMMD3,ICOSLG,TIMP1,ADAM9,CEBPB,ERCC1,CAT,SFRP1,SERPINB6,TSPAN14,COL1A2,DPP4,CTSZ,DLL4,COL1A1,ZFP36L2,CXCL6,TGFBR2,F2R,TMBIM1,PYCARD,PFKL,FOXF1,EMILI…
GO_POSITIVE_REGULATION_OF_NF_KAPPAB_TRANSCRIPTION_FACTOR_ACTIVITY	0.001961	0.02287	0.505577	1.84339	CAV1,SPHK1,CAT,TRADD,PYCARD,IL1B,WNT5A,CIB1,CARD16,CLU,AR,TRIM8,RELA,RIPK2,ZBTB7A,TICAM1,NFKB1,RBCK1,ARHGEF2,ICAM1,MTDH,IKBKG,TERF2IP,IRAK3,MTPN,TRIM25,RPS6KA4,TRIM38,RAB7B,IRAK1,UBC,CD40,HSPA1A,MAP3K13,TRIM22,IKBKB,GREM1,FLOT1,NFKB2,EDA2R,BCL10
HALLMARK_REACTIVE_OXYGEN_SPECIES_PATHWAY	0.003914	0.030665	0.579639	1.8427	GLRX,SOD2,JUNB,PRNP,NQO1,CAT,MSRA,G6PD,GLRX2,HHEX
GO_REGULATION_OF_VASCULATURE_DEVELOPMENT	0.001866	0.02287	0.450887	1.84198	ECM1,DCN,HGF,SP100,SPHK1,ENPP2,EGR1,RRAS,HSPB6,SOD2,NRP1,FAM129B,ANXA1,ENG,SERPINF1,GPNMB,CXCL8,BTG1,RNH1,PTGS2,SERPINE1,SFRP1,VEGFC,EMP2,DLL4,TGFBR2,ITGA5,ACVRL1,EMILIN1,THBS2,IL1B,SASH1,TNFSF12,PTN,WNT5A,C3,THBS1,ITGB1BP1,CIB1,HHEX,PPARG,BMP4,SPRED1,GRN,PGF,GLUL,JAK1,ITGB1,TNFRSF12A,HMGA2,PRKCA,PDCD4,MYDGF,ANGPTL4,PLXND1,MTDH,BMPER,GATA2,VEGFB,RHOB,KLF4,RAP1A,PML,SRPX2,AGGF1,SEMA5A,CD40,STAT1,N…
REACTOME_MET_PROMOTES_CELL_MOTILITY	0.004115	0.030665	0.605218	1.84146	HGF,ITGA2,COL3A1,COL1A2,COL1A1,LAMA4,COL5A3,LAMB1,ITGA3,ITGB1,TNS3,RAP1B,DOCK7,COL27A1,LAMC1,RAP1A
GO_CELL_CHEMOTAXIS	0.001845	0.02287	0.471673	1.84114	NBL1,CXCL1,LGALS3,HGF,GAS6,LPAR1,ACKR4,PDGFRB,PDGFRA,NRP1,ANXA1,SLIT2,CCL2,CXCL8,MTUS1,SERPINE1,VEGFC,CCL7,CXCL6,IL1B,LOX,LYST,HSD3B7,RAC2,WNT5A,THBS1,RHOG,SBDS,DUSP1,PARVA,PGF,FGFR1,CSF1,CKLF,F2RL1,VEGFB,RAB13,CH25H,CREB3,NR4A1,MPP1,SEMA5A,IL17RC,ZNF580,GREM1,CXCL3,PIK3CD,MAPK3,PIP5K1C,FGF1,HSPB1
GO_MONOCYTE_CHEMOTAXIS	0.004107	0.030665	0.664961	1.83844	NBL1,LGALS3,ANXA1,SLIT2,CCL2,SERPINE1,CCL7,DUSP1
GO_NEGATIVE_REGULATION_OF_CELL_SUBSTRATE_ADHESION	0.004016	0.030665	0.5708	1.83539	APOD,LGALS1,FBLN1,SERPINE1,COL1A1,ACVRL1,CDKN2A,THBS1,ITGB1BP1,DLC1,LRP1,ADAM15,PTEN,MMP14,GBP1,SPOCK1,HOXA7,ARHGAP6,NF1
GO_POSITIVE_REGULATION_OF_REACTIVE_OXYGEN_SPECIES_METABOLIC_PROCESS	0.004184	0.030665	0.629001	1.8319	PID1,TSPO,CDKN1A,PDGFRB,EGFR,TGFBR2,THBS1,GADD45A,F2RL1,GNAI2
GO_LEUKOCYTE_MIGRATION	0.001866	0.02287	0.447899	1.8299	MMP1,CD44,ECM1,APOD,NBL1,CXCL1,LGALS3,CAV1,ITGA2,GAS6,SLC16A3,IL1R1,CD47,ANXA1,SLIT2,CCL2,CXCL8,MTUS1,SERPINE1,COL1A2,VEGFC,COL1A1,CCL7,CXCL6,ITGA5,EPS8,PYCARD,GYPC,EMILIN1,IL1B,LYST,HSD3B7,RAC2,WNT5A,THBS1,GPC1,ITGA3,SDC1,SBDS,DUSP1,MSN,PGF,MMP14,ITGB1,CSF1,TNFRSF14,SDC4,ICAM1,CKLF,SIRPA,KITLG,F2RL1,VEGFB,FYN,CH25H,CREB3,TNFRSF10D,JAGN1,MPP1,IL17RC,ZNF580,HOXA7,GREM1,CXCL3,PIK3CD,SHC1,B4GALT1,AK…
REACTOME_INTERFERON_ALPHA_BETA_SIGNALING	0.006186	0.040649	0.598201	1.82735	PSMB8,EGR1,IFI6,IFI35,IFITM2,ISG20,IRF1,GBP2,JAK1,IRF2,IFNAR1,OAS3,XAF1,STAT1,IFITM3
REACTOME_RESPONSE_TO_ELEVATED_PLATELET_CYTOSOLIC_CA2PLUS	0.001912	0.02287	0.508421	1.8254	ECM1,HGF,GAS6,CD109,TIMP3,TIMP1,SERPINE1,VEGFC,SRGN,TAGLN2,TEX264,A1BG,THBS1,STX4,CD63,ISLR,LGALS3BP,QSOX1,LAMP2,CLU,PRKCA,TLN1,ANXA5,CD9,CYB5R1,TMX3,SCCPDH,VEGFB,APLP2,TOR4A,FLNA
REACTOME_HEMOSTASIS	0.001767	0.02287	0.423457	1.82506	MMP1,PLAU,CD44,ECM1,MGLL,CAV1,HGF,PLAUR,ITGA2,GNG11,GAS6,SLC16A3,CD47,CD99,SERPINE2,EHD3,EHD2,PLAT,MAFF,SH2B3,APBB1IP,CD109,F10,PROCR,SERPINB8,TIMP3,TIMP1,PTGIR,GNG12,ATP2B4,TFPI,SERPINE1,SERPINB6,COL1A2,VEGFC,COL1A1,SRGN,DOCK5,KCNMA1,ITGA5,F2R,TAGLN2,GYPC,EHD1,TEX264,A1BG,IRF1,RAC2,THBS1,STX4,GPC1,S100A10,ANXA2,CD63,ITGA3,RHOG,ISLR,SDC1,LGALS3BP,QSOX1,TUBA1A,LAMP2,GNG2,CLU,ITGB1,IRF2,CAPZB,TUBB6…
GO_NEGATIVE_REGULATION_OF_COAGULATION	0.004158	0.030665	0.631555	1.82223	PLAU,PLAUR,SERPINE2,PLAT,PDGFRA,PROCR,TFPI,SERPINE1,C1QTNF1,THBS1,ANXA2,FAP,ANXA5,CD9,UBASH3B
GO_NEGATIVE_REGULATION_OF_CELL_MATRIX_ADHESION	0.004158	0.030665	0.631461	1.82196	APOD,SERPINE1,ACVRL1,CDKN2A,THBS1,ITGB1BP1,DLC1,LRP1,ADAM15,PTEN,MMP14,HOXA7,ARHGAP6,NF1
GO_REGULATION_OF_HUMORAL_IMMUNE_RESPONSE	0.004167	0.030665	0.707661	1.82157	CD59,C1R,C1S,CFH,C3,CLU,CD55,CD81
GO_SMOOTH_MUSCLE_CELL_MIGRATION	0.003968	0.030665	0.557806	1.82066	PLAU,ITGA2,LPAR1,PDGFRB,PLAT,NRP1,SLIT2,IGFBP5,SERPINE1,DOCK5,LRP1,ILK,PARVA,MEF2C
REACTOME_SYNDECAN_INTERACTIONS	0.004107	0.030665	0.658364	1.8202	ITGA2,COL3A1,TNC,COL1A2,COL1A1,COL5A3,THBS1,SDC1,ITGB1,PRKCA,SDC4
HALLMARK_IL2_STAT5_SIGNALING	0.001869	0.02287	0.471012	1.81817	CD44,ECM1,NT5E,COL6A1,EMP1,WLS,AHNAK,PHLDA1,PLEC,NRP1,MAFF,CDCP1,PRNP,FAH,RNH1,SERPINB6,CTSZ,PRAF2,ANXA4,PLIN2,TWSG1,CKAP4,NFKBIZ,ST3GAL4,CAPG,SOCS2,NDRG1,GSTO1,AHR,MYO1C,SCN9A,MYC,CSF1,SNX9,LRRC8C,SNX14,KLF6,CCND3,IL4R,CYFIP1,CD83,CD81,RHOB,F2RL2,BATF3,ENPP1,PLAGL1
REACTOME_MET_ACTIVATES_PTK2_SIGNALING	0.004141	0.030665	0.642537	1.81787	HGF,ITGA2,COL3A1,COL1A2,COL1A1,LAMA4,COL5A3,LAMB1,ITGA3,ITGB1,COL27A1,LAMC1
GO_ACTIN_FILAMENT_DEPOLYMERIZATION	0.006198	0.040649	0.61501	1.8166	GSN,TRIOBP,CFL2,TWF2,EPS8,LIMA1,TMOD3,CAPG,TWF1,CAPZB,F2RL1,MTPN,CAPZA1,DSTN,SEMA5A,MICAL1
GO_NITRIC_OXIDE_BIOSYNTHETIC_PROCESS	0.003937	0.030665	0.564278	1.81534	ASS1,PTX3,CAV1,TSPO,CD47,ATP2B4,NQO1,PTGS2,IL1B,CLU,TICAM1,ICAM1,SIRPA,KLF4,SMAD3,SPR,AKT1,PTGIS,ZC3H12A
REACTOME_COLLAGEN_BIOSYNTHESIS_AND_MODIFYING_ENZYMES	0.004024	0.030665	0.561598	1.81477	COL6A2,COL6A1,COL6A3,COL3A1,COL15A1,COL13A1,P4HA2,COL1A2,PCOLCE,COL1A1,COL8A1,COL5A3,PLOD1,PLOD3,COL16A1,COL18A1,P3H3,ADAMTS2
GO_REGULATION_OF_COLLAGEN_BIOSYNTHETIC_PROCESS	0.004175	0.030665	0.653753	1.814	ITGA2,VIM,PDGFRB,ENG,LARP6,F2R,EMILIN1,PPARG,BMP4,RAP1A,PPARD,CREB3L1,CYGB,ERRFI1
GO_MEMBRANE_FUSION	0.001972	0.02287	0.49734	1.81217	CAV2,GAS6,ANXA1,TAPBP,STXBP6,VAMP4,TAP1,CHMP3,STX4,ANXA2,EEA1,STX10,STX1A,VAMP2,ATG7,CD9,SAMD9,VPS16,STX12,SAMD9L,TAP2,TMEM175,STX2,SPESP1,CHP1,SEPT8,RAB7B,SNAP29,VAMP3,STX18,SNAPIN,ANXA7,STX5,RAB7A,SEC22B,RAB34,STX8,PRRT2,VAPA,NAPG,VPS4A,CALR
GO_NEUROTRANSMITTER_METABOLIC_PROCESS	0.001988	0.02287	0.535955	1.81033	ASS1,PTX3,CAV1,MOXD1,TSPO,CD47,COMT,ATP2B4,NQO1,PTGS2,IL1B,CLU,TICAM1,ICAM1,SIRPA,DPYD,KLF4
GO_ORGANELLE_MEMBRANE_FUSION	0.002037	0.02287	0.523405	1.80907	CAV2,ANXA1,TAPBP,STXBP6,VAMP4,TAP1,CHMP3,STX4,ANXA2,EEA1,STX10,STX1A,SAMD9,VPS16,STX12,SAMD9L,TAP2,TMEM175,STX2,SEPT8,RAB7B,SNAP29,VAMP3,SNAPIN,STX5,RAB7A,SEC22B,RAB34,STX8,PRRT2
REACTOME_CYTOKINE_SIGNALING_IN_IMMUNE_SYSTEM	0.001712	0.02287	0.408036	1.80766	MMP1,TNFRSF11B,CD44,CASP1,CXCL1,HGF,SP100,PSMB8,PSMB9,MT2A,EREG,ZEB1,IL1R1,VIM,CDKN1A,FGF5,EGR1,PDGFRB,PDGFRA,SOD2,ANXA1,JUN,JUNB,EGFR,CCL2,IL6ST,APBB1IP,B2M,CCND1,IFI6,CXCL8,TIMP1,PTGS2,NFKBIA,MMP2,PSME1,COL1A2,DUSP7,IFI35,GBP3,IL10RB,UBE2L6,IL1B,AREG,DUSP6,NDN,TNFSF12,IFITM2,TNFRSF1A,ISG20,IRF1,MCL1,STX4,RELB,ANXA2,MMP3,IFNGR2,PSME2,SOCS2,SDC1,GBP2,SPRED1,STX1A,VAMP2,DUSP1,MSN,GSTO1,DUSP4,TRIM8…
GO_POSITIVE_REGULATION_OF_MYOTUBE_DIFFERENTIATION	0.004193	0.030665	0.737017	1.80716	CAPN2,EHD2,FAM129B,EHD1,MMP14,SHOX2,IL4R,GDF15,FLOT1,MAMSTR
GO_REGULATION_OF_TUMOR_NECROSIS_FACTOR_MEDIATED_SIGNALING_PATHWAY	0.003914	0.030665	0.568267	1.80655	CASP1,SPHK1,GAS6,CASP4,TRADD,PYCARD,TNFRSF1A,CARD16,RBCK1,IKBKG,F2RL1,CPNE1,HSPA1A,IKBKB,TNFAIP3,BIRC2,CLIP3
GO_T_HELPER_1_TYPE_IMMUNE_RESPONSE	0.004167	0.030665	0.701822	1.80654	IL1R1,ANXA1,IL1B,RELB,RIPK2,SOCS5,IL4R,STAT6,HRAS
REACTOME_FORMATION_OF_FIBRIN_CLOT_CLOTTING_CASCADE	0.004193	0.030665	0.735433	1.80327	SERPINE2,F10,PROCR,TFPI,F2R
GO_T_CELL_ACTIVATION_INVOLVED_IN_IMMUNE_RESPONSE	0.006036	0.039933	0.578994	1.80043	LGALS3,ANXA1,APBB1IP,LOXL3,NFKBIZ,RELB,RIPK2,SOCS5,ICAM1,IL4R,STAT6,F2RL1,RAB27A
GO_REGULATION_OF_CELLULAR_RESPONSE_TO_GROWTH_FACTOR_STIMULUS	0.001919	0.02287	0.449337	1.79801	NBL1,DCN,CAV1,CAV2,VEPH1,ZEB1,DKK3,LTBP1,FAM129B,ENG,HTRA1,SLIT2,CD109,TGFB1I1,MSX1,FBN1,SFRP1,VEGFC,LTBP4,TGFBR2,ITGA5,ACVRL1,EMILIN1,IL1B,LOX,TWSG1,DAB2,SMURF2,WNT5A,THBS1,TMEM204,GPC1,CD63,ITGA3,MYOF,CCBE1,HHEX,ADAMTS12,BMP4,FAM20C,ILK,SNX6,FZD1,MYO1C,VASN,FGFR1,ZBTB7A
GO_RESPONSE_TO_BIOTIC_STIMULUS	0.001704	0.02287	0.408006	1.79726	ASS1,PTX3,CASP1,CXCL1,DCN,CAV1,CD68,PRSS3,FOSL1,LOXL1,CAPN2,TSPO,CD47,TMEM173,VIM,OPTN,JUN,LY96,JUNB,HTRA1,CCL2,IFI16,B2M,IFI6,AXL,CXCL8,PTGES,COMT,PTGIR,GNG12,ADAM9,CEBPB,TFPI,PTGS2,NFKBIA,SERPINE1,CXCL6,GBP3,IL10RB,F2R,PYCARD,IL1B,SASH1,FAM20A,C19orf66,GSDMD,LYST,IFITM2,TNFRSF1A,ISG20,MICA,IRF1,WNT5A,C3,AP1S1,CALCOCO2,ADAM15,BAD,BNIP3L,IFNGR2,PMAIP1,WIPF1,SIRT2,APOBEC3C,GRN,CARD16,CLU,MAPKBP1,G…
GO_CELLULAR_RESPONSE_TO_OSMOTIC_STRESS	0.004149	0.030665	0.627416	1.79545	TSPO,MYLK,AKR1B1,PTGS2,SERPINB6,BDKRB2,RELB,BAD,LRRC8C,ARHGEF2,ZFP36L1
GO_TOLL_LIKE_RECEPTOR_SIGNALING_PATHWAY	0.001957	0.02287	0.50372	1.79525	CAV1,CTSK,CTSB,LY96,NFKBIA,CTSL,RFTN1,APPL2,IRF1,COLEC12,RTN4,TNIP1,TANK,RIPK2,TICAM1,IKBKG,IRAK3,RPS6KA3,F2RL1,IKBKE,PRKCE,RAB7B,IRAK1,UBC,MAPKAPK3,TRAF3,IKBKB,TNFAIP3,FLOT1,BCL10,BIRC2
GO_PROTEIN_MATURATION	0.001901	0.02287	0.447902	1.79521	PLAU,CASP1,PRSS3,CAPN2,ASPH,CAST,GSN,MME,TSPAN5,C1R,SERPINE2,PLAT,IFI16,ECE1,PRNP,AEBP1,SERPINE1,TSPAN14,CISD3,CTSZ,SRGN,PYCARD,CHAC1,THBS1,ANXA2,TMEM59,CCBE1,BAD,GAS1,CARD16,NAA20,LMF2,APH1B,MMP14,AIP,RIPK2,ADAMTS2,HM13,HTRA2,LMF1
BIOCARTA_IL1R_PATHWAY	0.004107	0.030665	0.64848	1.79287	IL1R1,JUN,NFKBIA,IL1B,RELA,NFKB1,MAP2K3,IRAK3,IRAK1,IKBKB
GO_SYNCYTIUM_FORMATION	0.004175	0.030665	0.646141	1.79287	CAPN2,EHD2,CD109,ADAM9,ERCC1,EHD1,CAMK1,MYOF,SH3PXD2A,IL4R,GDF15
GO_POSITIVE_REGULATION_OF_COLLAGEN_BIOSYNTHETIC_PROCESS	0.004141	0.030665	0.720067	1.7917	ITGA2,VIM,PDGFRB,ENG,LARP6,F2R,BMP4
GO_POSITIVE_REGULATION_OF_VASCULATURE_DEVELOPMENT	0.001894	0.02287	0.46939	1.79082	ECM1,HGF,SPHK1,EGR1,RRAS,HSPB6,SOD2,NRP1,ANXA1,ENG,CXCL8,BTG1,PTGS2,SERPINE1,VEGFC,TGFBR2,ITGA5,ACVRL1,IL1B,SASH1,TNFSF12,WNT5A,C3,THBS1,CIB1,GRN,PGF,JAK1,ITGB1,HMGA2,PRKCA,MYDGF,ANGPTL4,MTDH,BMPER,GATA2,VEGFB,RHOB,KLF4,RAP1A,SRPX2,AGGF1,SEMA5A,CD40,ADM,RUNX1,GREM1,FGF1,HSPB1,NFE2L2,PTGIS,PDCD6
GO_NEGATIVE_REGULATION_OF_ADHERENS_JUNCTION_ORGANIZATION	0.006263	0.040741	0.705382	1.78677	APOD,ACVRL1,THBS1,ITGB1BP1,DLC1,LRP1,PTEN,MMP14
GO_REGULATION_OF_MESENCHYMAL_CELL_PROLIFERATION	0.004149	0.030665	0.62393	1.78547	PRRX1,LMNA,ZEB1,TGFBR2,FOXF1,PTN,WNT5A,BMP4,FGFR1,MYC,SHOX2
REACTOME_SIGNALING_BY_INTERLEUKINS	0.001742	0.02287	0.41189	1.78499	MMP1,CASP1,CXCL1,HGF,PSMB8,PSMB9,EREG,ZEB1,IL1R1,VIM,CDKN1A,FGF5,PDGFRB,PDGFRA,SOD2,ANXA1,JUN,JUNB,EGFR,CCL2,IL6ST,APBB1IP,CCND1,CXCL8,TIMP1,PTGS2,NFKBIA,MMP2,PSME1,COL1A2,DUSP7,IL10RB,IL1B,AREG,DUSP6,NDN,TNFRSF1A,MCL1,STX4,ANXA2,MMP3,PSME2,SOCS2,SDC1,SPRED1,STX1A,VAMP2,DUSP1,MSN,GSTO1,DUSP4,JAK1,ITGB1,AIP,FGFR1,RELA,MEF2C,RIPK2,NFKB1,OSMR,RASA3,MYC,MAP2K3,CSF1,PDCD4,TLN1,SOCS5,PEA15,ICAM1,IKBKG,…
HALLMARK_KRAS_SIGNALING_UP	0.00381	0.030665	0.469444	1.78181	TMEM158,PLAU,APOD,PRRX1,PLAUR,ITGA2,EMP1,PSMB8,EREG,GNG11,GLRX,PLAT,NRP1,LY96,ENG,GPNMB,TFPI,PTGS2,PPP1R15A,GYPC,IL1B,DUSP6,CFH,DCBLD2,PRDM1,PLEK2,ADGRL4,G0S2,ANGPTL4,ITGBL1,F2RL1,NIN,DNMBP,KLF4,ETV1,ERO1A,BPGM
GO_GROWTH_PLATE_CARTILAGE_CHONDROCYTE_DIFFERENTIATION	0.006211	0.040674	0.680791	1.77995	COL6A2,COL6A1,COL6A3,TGFBR2,SCARA3,RARG,ANXA6,COL27A1
BIOCARTA_STRESS_PATHWAY	0.004193	0.030665	0.652898	1.77877	JUN,NFKBIA,TRADD,TNFRSF1A,TANK,RELA,NFKB1,MAP2K3,CRADD,IKBKG
REACTOME_TRIGLYCERIDE_METABOLISM	0.004193	0.030665	0.652831	1.77859	MGLL,CAV1,GK,LPIN1,FABP3,PLIN3,GPD2,ABHD5,LPIN3,LPIN2
GO_POSITIVE_REGULATION_OF_CELL_JUNCTION_ASSEMBLY	0.004202	0.030665	0.635042	1.77769	CAV1,NRP1,SFRP1,ITGB1BP1,S100A10,COL16A1,SDC4,PPM1F,FMN1,SMAD3,FLOT1,ROCK1,ABL1,MAP4K4,VEGFA
GO_PLATELET_DEGRANULATION	0.001976	0.02287	0.50311	1.7772	ECM1,HGF,GAS6,CD109,TIMP3,TIMP1,SERPINE1,VEGFC,SRGN,TAGLN2,TEX264,A1BG,THBS1,CD63,ISLR,LGALS3BP,QSOX1,LAMP2,CLU,TLN1,ANXA5,CD9,CYB5R1,TMX3,SCCPDH,VEGFB,APLP2,TOR4A,FLNA
GO_POSITIVE_REGULATION_OF_LOCOMOTION	0.001799	0.02287	0.415585	1.77503	TWIST2,PLAU,LGALS3,CAV1,HGF,ITGA2,SPHK1,CAV2,ENPP2,GAS6,IL1R1,LPAR1,PDGFRB,PDGFRA,SOD2,NRP1,ANXA1,JUN,MYLK,EGFR,SLIT2,CPNE3,F10,CDH13,GPNMB,IGFBP5,CXCL8,ADAM9,SNAI2,PTGS2,SERPINE1,VEGFC,TRADD,COL1A1,CCL7,DDR2,TGFBR2,DOCK5,ITGA5,F2R,PYCARD,RHOC,FOXF1,IL1B,PLPP3,SASH1,LAMB1,DAB2,SMURF2,CHMP3,RAC2,WNT5A,CD151,THBS1,ITGB1BP1,STX4,LRP1,ITGA3,CIB1,RTN4,BMP4,GRN,ILK,COL18A1,MGAT5,MYO1C,PGF,MMP14,FGFR1,M…
GO_MUSCLE_CELL_MIGRATION	0.00396	0.030665	0.531284	1.77476	PLAU,ITGA2,LPAR1,PDGFRB,PLAT,NRP1,ANXA1,SLIT2,IGFBP5,SERPINE1,DOCK5,ITGB1BP1,LRP1,ILK,PARVA,MEF2C,DOCK7,NET1,BIN3,PPARD,ARPC5,SSH1,NFE2L2,SIX1,MDM2,DOCK4
GO_REGULATION_OF_CELL_ADHESION	0.001757	0.02287	0.409008	1.77399	PLAU,CD44,ASS1,APOD,LGALS3,CAV1,ITGA2,LPXN,CD47,LGALS1,GSN,TRIOBP,SERPINE2,NRP1,ANXA1,FBLN2,FBLN1,CCL2,IL6ST,APBB1IP,PRNP,CDH13,GPNMB,CXCL8,ICOSLG,ADAM9,SNAI2,CEBPB,SERPINE1,TNC,SFRP1,DPP4,EMP2,COL1A1,DDR2,TGFBR2,LAMA4,DOCK5,COL8A1,ITGA5,ACVRL1,PYCARD,FOXF1,EMILIN1,LOXL3,IL1B,PLPP3,SLK,TWSG1,GPM6B,NFKBIZ,PTN,C1QTNF1,CDKN2A,IRF1,RAC2,WNT5A,THBS1,FXYD5,ITGB1BP1,DLC1,NINJ1,STX4,LRP1,S100A10,ITGA3,AD…
GO_REGULATION_OF_REACTIVE_OXYGEN_SPECIES_METABOLIC_PROCESS	0.00202	0.02287	0.514251	1.77367	PID1,TSPO,CDKN1A,PDGFRB,EGFR,STK17A,CRYAB,TGFBR2,G6PD,RAC2,THBS1,MPV17,MMP3,GADD45A,SIRT2,TFAP2A
REACTOME_CROSSLINKING_OF_COLLAGEN_FIBRILS	0.008386	0.049994	0.722401	1.77132	LOXL1,LOXL4,COL1A2,PCOLCE,COL1A1,LOXL3,LOX
BIOCARTA_NTHI_PATHWAY	0.004193	0.030665	0.658804	1.76989	CXCL8,NFKBIA,TGFBR2,IL1B,NR3C1,DUSP1,RELA,NFKB1,MAP2K3,IKBKB,SMAD3
GO_RESPONSE_TO_TYPE_I_INTERFERON	0.003906	0.030665	0.53414	1.76953	SP100,PSMB8,EGR1,IFI6,IFI35,C19orf66,IFITM2,ISG20,IRF1,WNT5A,GBP2,JAK1,IRF2,IFNAR1,IKBKE,TRIM56,OAS3,IRAK1,XAF1,STAT1,MAVS,IFITM3
GO_NEGATIVE_REGULATION_OF_PEPTIDASE_ACTIVITY	0.001912	0.02287	0.464651	1.76849	CD44,ECM1,HGF,PLAUR,COL6A3,GAS6,CAST,SERPINE2,CST3,TIMP2,IFI16,CD109,IFI6,SERPINF1,SERPINB8,TIMP3,TIMP1,TFPI,PTGS2,SERPINE1,LXN,SERPINB6,CRYAB,C3,THBS1,HMSD,CARD16
GO_RESPONSE_TO_PURINE_CONTAINING_COMPOUND	0.001931	0.02287	0.492888	1.76842	STC1,ASS1,FOSL1,JUN,JUNB,IGFBP5,PTGS2,COL1A1,FOSB,IL1B,AREG,PPARG,SDC1,LDHA,DUSP1,AHR,PRKAA1,PTEN,RELA,RAP1B,FOS,RAP1A,ZFP36L1,MMP19
GO_LAMELLIPODIUM_ORGANIZATION	0.003914	0.030665	0.52419	1.76781	CD44,ENPP2,SLIT2,CDH13,ABLIM3,TWF2,RAC2,SPATA13,TWF1,ITGB1,CAPZB,CYFIP1,PARVB,BIN3,ARPC5,SSH1,NCK1,CTTN,SNX1,RHOD,ARFIP2,WASF3,SSH2,CORO1C,ARPIN,FSCN1
GO_REGULATION_OF_FATTY_ACID_OXIDATION	0.008333	0.049813	0.685976	1.76575	APPL2,FABP3,C1QTNF2,PPARG,ACADVL,LONP2,PPARA,AKT1
GO_ROOF_OF_MOUTH_DEVELOPMENT	0.001965	0.02287	0.522	1.76483	PRRX1,TBX3,ASPH,ARID5B,PDGFRA,MSX1,SNAI2,TBX2,TGFBR2,TSHZ1,LOXL3,INSIG1,OSR2,WNT5A,TFAP2A,FZD1,MEF2C,BNC2,HAND2
GO_NEUTROPHIL_MIGRATION	0.005952	0.039844	0.553919	1.76448	CXCL1,LGALS3,IL1R1,SLIT2,CCL2,CXCL8,CCL7,CXCL6,IL1B,RAC2,CKLF,JAGN1,MPP1,CXCL3,PIK3CD,PIP5K1C,CD99L2
GO_RESPONSE_TO_DSRNA	0.006198	0.040649	0.596624	1.76229	CAV1,TMEM173,NFKBIA,RFTN1,COLEC12,RALB,PMAIP1,RIPK2,TICAM1,NFKB1,IRAK3,MAVS,FLOT1,CARD9,MAPK3
KEGG_BLADDER_CANCER	0.008114	0.049149	0.572031	1.76217	MMP1,CDKN1A,EGFR,CCND1,CXCL8,TYMP,MMP2,VEGFC,CDKN2A,THBS1,PGF,MYC,RASSF1,VEGFB,RB1
GO_REGULATION_OF_PROTEIN_COMPLEX_DISASSEMBLY	0.00198	0.02287	0.500388	1.75931	ASPH,GSN,TRIOBP,MAP1A,CFL2,TWF2,EPS8,STMN2,LIMA1,TMOD3,CALCOCO2,CIB1,CAPG,NAV3,TWF1,CAPZB,NES,ARHGEF2,IRAK3,F2RL1,MTPN,CAPZA1,EIF5A2,DSTN,SEMA5A,GBA
GO_REGULATION_OF_CELLULAR_RESPONSE_TO_TRANSFORMING_GROWTH_FACTOR_BETA_STIMULUS	0.001938	0.02287	0.490307	1.75815	CAV1,CAV2,VEPH1,ZEB1,DKK3,LTBP1,ENG,HTRA1,CD109,TGFB1I1,FBN1,LTBP4,TGFBR2,EMILIN1,LOX,DAB2,SMURF2,THBS1,ITGA3,SNX6,VASN,ZBTB7A
GO_REGULATION_OF_VASCULAR_ENDOTHELIAL_GROWTH_FACTOR_RECEPTOR_SIGNALING_PATHWAY	0.004193	0.030665	0.645004	1.75726	FAM129B,VEGFC,ITGA5,EMILIN1,IL1B,TMEM204,MYOF,HHEX,PDCD6,HGS,NEDD4,VEGFA,EPN2
GO_MULTI_MULTICELLULAR_ORGANISM_PROCESS	0.003788	0.030665	0.45981	1.75428	STC1,FOSL1,ITGA2,CAPN2,PAM,NR2F2,CTSB,SERPINE2,MAFF,JUNB,FBLN1,AKR1B1,IGFBP5,TIMP1,COMT,PTGS2,MMP2,EMP2,FOSB,PAPPA,TGFBR2,ITGA5,IL1B,IGFBP7,SMURF2,ITGA3,RGS2,COL16A1,AR,PRDM1,PGF
GO_GLIAL_CELL_ACTIVATION	0.006263	0.040741	0.692408	1.75391	JUN,EGFR,IL1B,LRP1,GRN,CLU,NAMPT,BACE2
GO_ENDOTHELIAL_CELL_MIGRATION	0.001848	0.02287	0.446338	1.75256	STC1,DCN,PRSS3,SP100,NR2F2,NRP1,ANXA1,SLIT2,CDH13,SERPINF1,PTGS2,DPP4,VEGFC,EMP2,DLL4,ACVRL1,PLPP3,SASH1,TNFSF12,WNT5A,THBS1,ITGB1BP1,CIB1,FAP,PPARG,BMP4,SPRED1,GRN,PXN,GLUL,PTEN,ITGB1,FGFR1,MEF2C,MAP2K3,PRKCA,S100A2,PLXND1,GPX1,AMOTL1,BMPER,GATA2,RHOB,RAB13,KLF4,SRPX2,NR4A1,SEMA5A,ZNF580,CD40,NF1
GO_REGULATION_OF_CALCIUM_ION_TRANSPORT	0.00381	0.030665	0.461582	1.75197	STC1,LGALS3,CAV1,TSPO,AHNAK,EHD3,PDGFRB,MYLK,CCL2,PRNP,GEM,PTGS2,HOMER3,F2R,G6PD,NTSR1,TRPV2,ANXA2,GSTO1,SLC9A1,ICAM1,BIN1,CACNB3,UBASH3B,FYN,HSPA2,ORAI1,PRKCE,CEMIP,PML,GNAI2
GO_REGULATION_OF_RESPONSE_TO_CYTOKINE_STIMULUS	0.003717	0.030665	0.461168	1.75045	ECM1,CASP1,CAV1,SPHK1,GAS6,IL1R1,CASP4,SLIT2,AXL,TRADD,PYCARD,TNFRSF1A,WNT5A,AGPAT2,IFNGR2,PPARG,CARD16,JAK1,RIPK2,RBCK1,CSF1,IKBKG,IRAK3,F2RL1,IKBKE,KLF4,NR1H2,PARP14,ELF1,IRAK1,CPNE1,SIGIRR,STAT1,RUNX1,HSPA1A,IKBKB,MAVS,TNFAIP3
KEGG_TOLL_LIKE_RECEPTOR_SIGNALING_PATHWAY	0.003945	0.030665	0.526683	1.74741	CTSK,JUN,LY96,CXCL8,NFKBIA,IL1B,RELA,TICAM1,NFKB1,MAP2K3,IFNAR1,IKBKG,IKBKE,FOS,IRAK1,CD40,STAT1,TRAF3,IKBKB,PIK3CD,AKT1,MAPK3
GO_POSITIVE_REGULATION_OF_CD4_POSITIVE_ALPHA_BETA_T_CELL_ACTIVATION	0.008333	0.049813	0.677602	1.74419	ANXA1,TGFBR2,NFKBIZ,RIPK2,SOCS5,CD55,IL4R,CD83
GO_REGULATION_OF_CYSTEINE_TYPE_ENDOPEPTIDASE_ACTIVITY	0.001859	0.02287	0.443543	1.74375	CD44,CASP1,HGF,PLAUR,PSMB9,ASPH,GAS6,CAST,GSN,CASP4,IFI16,IFI6,DAP,PTGS2,ARL6IP5,TRADD,IFT57,CRYAB,BID,F2R,FAS,PYCARD,MAP3K5,THBS1,DLC1,BAD,PMAIP1,PPARG,CARD16,RIPK2,MYC,CRADD,HTRA2,GPX1,RPS6KA3,FYN,PDCD5,KLF4,PML,CDKN2D,MGMT,HERPUD1,PPM1F,RPS27L,MICAL1,PERP,SMAD3,AKT1,BCL10,BIRC2,MDM2,PDCD6,APOPT1
GO_RESPONSE_TO_ACID_CHEMICAL	0.001866	0.02287	0.426685	1.74323	ASS1,COL6A1,ITGA2,CAPN2,PID1,ZEB1,GSN,EGR1,PDGFRB,PDGFRA,COL3A1,EGFR,AKR1B1,SERPINF1,PTGES,ATP2B4,NQO1,CEBPB,PTGS2,CAT,TNC,MMP2,SFRP1,COL1A2,COL1A1,TWF2,FABP3,IGFBP7,PTN,WNT5A,RRAGA,BAD,PPARG,NFATC4,COL16A1,GNG2,DUSP1,COL18A1,RARG,PRKAA1,ATG7,RELA,TRIM16,HTRA2,CD9,LRP11,GSS,ICAM1,WNT5B
GO_ADAPTIVE_IMMUNE_RESPONSE	0.001866	0.02287	0.439678	1.74139	POU2F2,IL1R1,CTSC,C1R,ANXA1,C1S,IL6ST,B2M,ICOSLG,ERCC1,CTSL,EMP2,BTN3A2,RFTN1,PYCARD,LOXL3,IL1B,TAP1,NFKBIZ,MICA,IRF1,C3,RELB,HPRT1,CLU,PRDM1,ERAP2,DBNL,MEF2C,RIPK2,SOCS5,PAG1,CD55,TNFRSF14,ICAM1,IL4R,STAT6,CD81,FYN,ORAI1,TAP2,TFEB,DUSP10,RAB27A,PARP3,CD40,HRAS,PIK3CD,TNFAIP3,NFKB2,BCL10,GNL1,TFE3,ZC3H12A,NEDD4,BTN3A1,RAET1G,UNC93B1
KEGG_PPAR_SIGNALING_PATHWAY	0.007968	0.04879	0.552814	1.73972	MMP1,GK,FABP3,PPARG,SCP2,ILK,SCD5,ANGPTL4,ACOX2,CPT1C,FADS2,ACAA1,PLTP,ACSL4,UBC,DBI,PPARD,PPARA
GO_REGULATION_OF_CELLULAR_COMPONENT_MOVEMENT	0.001653	0.02287	0.388914	1.73907	TWIST2,STC1,PLAU,ECM1,APOD,NBL1,DCN,LGALS3,CAV1,HGF,PHLDA2,SP100,ITGA2,SPHK1,LMNA,EREG,ENPP2,GAS6,IL1R1,NR2F2,LPAR1,SERPINE2,PDGFRB,RRAS,PDGFRA,COL3A1,SOD2,NRP1,ANXA1,JUN,MYLK,ENG,EGFR,FBLN1,SLIT2,CCL2,CPNE3,F10,CDH13,SERPINF1,GPNMB,IGFBP5,CXCL8,TIMP1,ADAM9,MTUS1,SNAI2,SSX2IP,PTGS2,SERPINE1,SFRP1,SRGAP1,VEGFC,TRADD,EMP2,DLL4,COL1A1,CCL7,DDR2,TGFBR2,LAMA4,DOCK5,ARHGAP18,ITGA5,F2R,APPL2,ACVRL1,PYCA…
GO_CHONDROCYTE_DIFFERENTIATION_INVOLVED_IN_ENDOCHONDRAL_BONE_MORPHOGENESIS	0.006289	0.040741	0.637754	1.73751	COL6A2,COL6A1,COL6A3,TGFBR2,SCARA3,RARG,ANXA6,COL27A1,TRIP11,COL12A1
GO_NEGATIVE_REGULATION_OF_INFLAMMATORY_RESPONSE	0.001992	0.02287	0.500759	1.73739	APOD,NT5E,HGF,SERPINF1,APPL2,PYCARD,FOXF1,TNFRSF1A,CUEDC2,PPARG,PBK,GRN,METRNL,NFKB1,PDCD4,SOCS5,TNFAIP6,GPX1,SIRPA,MVK,KLF4,RB1,DUSP10,FNDC4,PPARD,PPARA,GBA,SMAD3,TNFAIP3,ABR,PTGIS,ZC3H12A
GO_NEGATIVE_REGULATION_OF_PROTEOLYSIS	0.001859	0.02287	0.43031	1.73717	CD44,ECM1,HGF,PLAUR,COL6A3,GAS6,CAST,SERPINE2,CAMK2N1,PLAT,CST3,TIMP2,IFI16,CD109,IFI6,PRNP,MAP1A,SERPINF1,SERPINB8,TIMP3,TIMP1,TFPI,PTGS2,SERPINE1,LXN,SERPINB6,CTSZ,CRYAB,CHAC1,C3,THBS1,TMEM59,HMSD,GAS1,PBK,CARD16
GO_NEGATIVE_REGULATION_OF_EPITHELIAL_CELL_MIGRATION	0.005952	0.039844	0.532194	1.73672	STC1,DCN,SP100,NR2F2,SLIT2,SERPINF1,DLL4,ACVRL1,THBS1,ITGB1BP1,PPARG,SPRED1,PTEN,MEF2C
GO_INACTIVATION_OF_MAPK_ACTIVITY	0.006289	0.040741	0.646065	1.73567	CAV1,RGS3,DUSP7,DUSP6,SPRED1,DUSP1,DUSP4,DUSP10,DUSP14,DUSP18
GO_CELLULAR_RESPONSE_TO_ABIOTIC_STIMULUS	0.001866	0.02287	0.422426	1.73559	ADIRF,CASP1,ITGA2,TSPO,MME,CDKN1A,EGR1,MYLK,ENG,EGFR,IFI16,AKR1B1,SNAI2,ERCC1,PTGS2,SFRP1,SERPINB6,BDKRB2,COL1A1,CRYAB,FAS,XPC,IL1B,TNFRSF1A,PTN,IRF1,RELB,GADD45A,BAD,PBK,NFATC4,PIEZO1,CARD16,TANK,DDB2,BAG3,SLC9A1,PTEN,NFKB1,HMGA2,TMEM109,MYC,CRADD,LRRC8C,ARHGEF2,XPA,TNKS1BP1,MTPN,RHOB,NAMPT,ZFP36L1,RAB11FIP5,CHP1,MGMT,NET1,POLK
GO_REGULATION_OF_EPITHELIAL_CELL_MIGRATION	0.001873	0.02287	0.434505	1.73212	STC1,DCN,SP100,ITGA2,ENPP2,NR2F2,NRP1,ANXA1,JUN,SLIT2,SERPINF1,ADAM9,PTGS2,VEGFC,EMP2,DLL4,TGFBR2,DOCK5,ACVRL1,PLPP3,SASH1,WNT5A,THBS1,ITGB1BP1,ITGA3,CIB1,RTN4,PPARG,BMP4,SPRED1,GRN,GLUL,PTEN,FGFR1,MEF2C,MAP2K3,PRKCA,AMOTL1,BMPER,GATA2,RHOB,PRKCE,KLF4,DUSP10,SRPX2,SEMA5A,ZNF580,PPM1F,CD40,NF1
GO_VESICLE_ORGANIZATION	0.001835	0.02287	0.418123	1.73187	CAV1,CD59,CAV2,CTSC,SERPINE2,SRPX,ANXA1,TAPBP,RAB38,RAB32,STXBP6,CTSZ,SRGN,F2R,CNIH3,VAMP4,AREG,INSIG1,TAP1,LYST,CHMP3,STX4,SCARB2,S100A10,ANXA2,ANKRD28,VPS28,EEA1,SDC1,STX10,DNM1,STX1A,ZEB2,SAMD9,TRAPPC1,SDC4,VPS16,HPS1,STX12,AP1M1,PDCD6IP,ARFGAP3,MVB12A,SEC31A,SEC24D,SEC23A,SAR1B,SQSTM1,SAMD9L,MCFD2,TAP2,TMEM175,STX2,BLOC1S1,RAB27A,RAB22A,SEPT8,RAB7B,TMED10,VPS37B,CSNK1D,TRAPPC3,SNAP29,CNIH1,VA…
GO_SENSORY_PERCEPTION_OF_PAIN	0.008081	0.049081	0.559275	1.73184	MGLL,ITGA2,MME,CCL2,COMT,PTGS2,LXN,F2R,NTSR1,NDN,SLC9A1,SCN9A,CACNB3,FYN
GO_GLAND_MORPHOGENESIS	0.001996	0.02287	0.488963	1.73174	CAV1,HGF,TBX3,NRP1,EGFR,IGFBP5,SNAI2,CEBPB,TBX2,TNC,SFRP1,TGFBR2,AREG,TWSG1,PTN,WNT5A,BMP4,MSN,AR,RARG,FGFR1,CSF1,PLXND1,CAPN1,STAT6
GO_FACE_MORPHOGENESIS	0.008214	0.049489	0.625845	1.73029	ASPH,ARID5B,RRAS,PDGFRA,MSX1,MMP2,COL1A1
GO_REGULATION_OF_CALCIUM_ION_IMPORT	0.008333	0.049813	0.672083	1.72999	STC1,LGALS3,PDGFRB,CCL2,PRNP,TRPV2
GO_BONE_MORPHOGENESIS	0.00198	0.02287	0.49255	1.72934	STC1,COL6A2,COL6A1,COL6A3,MSX1,COL13A1,COL1A1,TGFBR2,HOXA11,INSIG1,OSR2,ANXA2,TFAP2A,BMP4,SCARA3,RARG,MMP14,MEF2C,ANXA6,NAB2,SHOX2
GO_CELLULAR_RESPONSE_TO_DSRNA	0.008333	0.049813	0.671439	1.72833	CAV1,TMEM173,COLEC12,RALB,NFKB1,MAVS,FLOT1
GO_LYMPHOCYTE_MIGRATION	0.007968	0.04879	0.548815	1.72714	ECM1,APOD,GAS6,CCL2,CCL7,PYCARD,HSD3B7,WNT5A,MSN,TNFRSF14,ICAM1,CKLF,CH25H,PIK3CD,AKT1,CD99L2
GO_VESICLE_TARGETING_TO_FROM_OR_WITHIN_GOLGI	0.003976	0.030665	0.510928	1.72579	CD59,CTSC,CTSZ,WIPI1,CNIH3,AREG,ANKRD28,TRAPPC1,ARFGAP3,SEC31A,SEC24D,SEC23A,SAR1B,MCFD2,CEP19,TMED10,CSNK1D,TRAPPC3,CNIH1,PDCD6,STX5,SEC13,GRIA1,SEC22B,RAB1B,TMED9,COL7A1,LMAN1,SAR1A,GOLGA2,GBF1,TRAPPC4,NSF,TFG,SEC24C,TRAPPC9,RAB1A
GO_CHONDROCYTE_DEVELOPMENT_INVOLVED_IN_ENDOCHONDRAL_BONE_MORPHOGENESIS	0.008333	0.049813	0.669903	1.72438	COL6A2,COL6A1,COL6A3,TGFBR2,SCARA3,RARG,COL27A1
GO_MYELOID_LEUKOCYTE_MIGRATION	0.003899	0.030665	0.477494	1.72355	NBL1,CXCL1,LGALS3,IL1R1,CD47,ANXA1,SLIT2,CCL2,CXCL8,MTUS1,SERPINE1,VEGFC,CCL7,CXCL6,EMILIN1,IL1B,RAC2,THBS1,DUSP1,PGF,MMP14,CSF1,CKLF,SIRPA,VEGFB,CREB3,JAGN1,MPP1,IL17RC,GREM1,CXCL3,PIK3CD,MAPK3,PIP5K1C,CD99L2
GO_REGULATION_OF_ACTIN_FILAMENT_ORGANIZATION	0.001912	0.02287	0.429271	1.72101	CDC42EP3,CD47,GSN,LPAR1,TRIOBP,NRP1,CIT,SLIT2,CDC42EP2,SFRP1,CFL2,TWF2,ARHGAP18,EPS8,CDC42EP5,PYCARD,RHOC,LIMA1,ARPC1B,CDC42EP1,ITGB1BP1,DLC1,S100A10,TMOD3,WIPF1,CAPG,TWF1,PXN,SLC9A1,MYO1C,CAPZB,FHOD1,ARPC1A,SNX9,SDC4,ICAM1,BIN1,F2RL1,CYFIP1,MTPN,PRKCE,SORBS3,CAPZA1,TMSB10,FLNA,CDC42EP4,DSTN,SEMA5A,PPM1F,ARHGAP6,ARPC5,FMN1,SMAD3,MYADM,SSH1,NCK1,CTTN,ARHGAP35,RICTOR,EVL,ROCK1,ARF6,SSH2,ABL1,ACTR3,…
GO_RESPONSE_TO_AMINO_ACID	0.001992	0.02287	0.485522	1.72093	ASS1,COL6A1,CAPN2,ZEB1,PDGFRA,COL3A1,EGFR,CEBPB,MMP2,COL1A2,COL1A1,PTN,RRAGA,BAD,COL16A1,RELA,GSS,ICAM1
GO_RESPONSE_TO_LIPID	0.001686	0.02287	0.387747	1.72068	STC1,ASS1,CASP1,CXCL1,DCN,CAV1,CD68,FOSL1,LOXL1,ITGA2,CAPN2,PID1,TSPO,PAM,NR2F2,VIM,LPAR1,CDKN1A,FAM210B,PDGFRB,ANXA1,JUN,LY96,JUNB,ENG,EGFR,SLIT2,CCL2,CCND1,TGFB1I1,SERPINF1,AXL,CXCL8,PTGES,COMT,PTGIR,GNG12,ADAM9,NQO1,SNAI2,CEBPB,TFPI,PTGS2,CAT,NFKBIA,SERPINE1,TNC,SFRP1,COL1A1,CRYAB,FOSB,TWF2,ZFP36L2,PAPPA,CXCL6,TGFBR2,FHL2,F2R,FABP3,PYCARD,NTSR1,IL1B,SASH1,AREG,LOX,INSIG1,IGFBP7,ARPC1B,DAB2,PTN…
KEGG_GLYCOSAMINOGLYCAN_DEGRADATION	0.008333	0.049813	0.668246	1.72011	HS3ST3A1,HEXB,HGSNAT,IDUA,IDS,GALNS,HS3ST3B1,HEXA,GNS,SGSH,NAGLU,HYAL3
GO_REGULATION_OF_DEFENSE_RESPONSE	0.001748	0.02287	0.395704	1.71843	APOD,NT5E,MGLL,CAV1,HGF,CTSK,ITGA2,PSMB8,PSMB9,EREG,IL1R1,CD47,TMEM173,CTSB,OPTN,ANXA1,LY96,HTRA1,EGFR,IL6ST,IFI16,SERPINF1,CEBPB,PTGS2,NFKBIA,SERPINE1,CTSL,PSME1,TRADD,RFTN1,CXCL6,APPL2,PYCARD,FOXF1,IL1B,NFKBIZ,TNFRSF1A,MICA,IRF1,WNT5A,C3,COLEC12,RELB,MMP3,CUEDC2,RTN4,ADAMTS12,IFNGR2,PSME2,PPARG,SIRT2,PBK,TNIP1,GRN,TANK,METRNL,MAPKBP1,JAK1,RELA,MEF2C,RIPK2,TICAM1,NFKB1,OSMR,PDCD4,SOCS5,TNFAIP6,G…
REACTOME_POST_TRANSLATIONAL_MODIFICATION:_SYNTHESIS_OF_GPI_ANCHORED_PROTEINS	0.005952	0.039844	0.53861	1.71571	PLAUR,LY6K,CD109,NTM,LY6E,DPM3,PIGT,LYPD3,NTNG1,PIGP,PIGF,GPAA1,PSCA,PIGH,PIGV,RAET1G
GO_TUMOR_NECROSIS_FACTOR_MEDIATED_SIGNALING_PATHWAY	0.003846	0.030665	0.45885	1.7154	TNFRSF11B,CASP1,PSMB8,SPHK1,PSMB9,GAS6,CASP4,NFKBIA,PSME1,TRADD,PYCARD,TNFSF12,TNFRSF1A,PSME2,TNFRSF19,CARD16,ILK,TNFRSF12A,RELA,RBCK1,TNFRSF14,IKBKG,PSMF1,F2RL1,PSMD9,CPNE1,CD40,STAT1,TRAF3,HSPA1A,IKBKB,TNFAIP3,EDA2R,BIRC2,CLIP3
GO_NEGATIVE_REGULATION_OF_IMMUNE_SYSTEM_PROCESS	0.001835	0.02287	0.416221	1.71346	APOD,NBL1,LGALS3,CD68,CD59,LPXN,CD47,COL3A1,ANXA1,LY96,HTRA1,SLIT2,CCL2,IFI16,PRNP,GPNMB,AXL,CEBPB,NFKBIA,FBN1,SFRP1,FOXF1,EMILIN1,LOXL3,TWSG1,MICA,IRF1,THBS1,CIB1,CUEDC2,PPARG,HOXA9,BMP4,GRN,DUSP1,TICAM1,MYC,GBP1,MEIS1,SOCS5,PAG1,CD55,TNFRSF14,SDC4,GPX1,IRAK3,KITLG,IL4R,GATA2,STAT6,F2RL1,UBASH3B,ZFP36,DUSP10,NR1H2,MAD1L1,ZFP36L1,PARP14,ELF1,TRIM38,PARP3,RAB7B,HOXA7,FAM3A,NF1,RUNX1,TAPBPL,GREM1,T…
GO_FIBROBLAST_PROLIFERATION	0.003929	0.030665	0.506305	1.71177	S100A6,SPHK1,EREG,GAS6,CDKN1A,PDGFRB,PDGFRA,JUN,EGFR,SFRP1,DDR2,WNT5A,ANXA2,PPARG,MED31,MYC
GO_POSITIVE_REGULATION_OF_NITRIC_OXIDE_BIOSYNTHETIC_PROCESS	0.008214	0.049489	0.618853	1.71096	ASS1,PTX3,PTGS2,IL1B,CLU,TICAM1,ICAM1,KLF4,SMAD3,AKT1
GO_REACTIVE_OXYGEN_SPECIES_BIOSYNTHETIC_PROCESS	0.003976	0.030665	0.506408	1.71052	ASS1,PTX3,CAV1,TSPO,CD47,ATP2B4,NQO1,PTGS2,IL1B,CLU,TICAM1,ICAM1,SIRPA,FYN,KLF4,RAB27A,SMAD3,SPR,AKT1,PTGIS,ZC3H12A
GO_REGULATION_OF_RESPONSE_TO_WOUNDING	0.003899	0.030665	0.473238	1.70819	PLAU,CAV1,PLAUR,CDKN1A,SERPINE2,PLAT,PDGFRA,ANXA1,MYLK,CD109,TFPI,SERPINE1,TGFBR2,F2R,PLPP3,C1QTNF1,THBS1,LRP1,ANXA2,FAP,GRN,PTEN,TNFRSF12A,PRKCA,ANXA5,CD9,F2RL1,UBASH3B,PRKCE,KLF4,DUSP10
GO_POSITIVE_REGULATION_OF_CYTOKINE_BIOSYNTHETIC_PROCESS	0.006303	0.040741	0.610108	1.70789	EREG,EGR1,IL1B,IRF1,WNT5A,THBS1,RELA,TICAM1
GO_NEGATIVE_REGULATION_OF_EXTRINSIC_APOPTOTIC_SIGNALING_PATHWAY	0.002004	0.02287	0.491849	1.70626	LGALS3,HGF,LMNA,NRP1,IFI6,SNAI2,SERPINE1,TRADD,TMBIM1,FAS,IL1B,MCL1,THBS1,BMP4,AR,RELA,PEA15,ARHGEF2,ICAM1,GPX1,IL19,FYN,GDNF,HSPA1A,TNFAIP3,AKT1,ACVR1,CTTN
REACTOME_NUCLEOTIDE_BINDING_DOMAIN_LEUCINE_RICH_REPEAT_CONTAINING_RECEPTOR_NLR_SIGNALING_PATHWAYS	0.005952	0.039844	0.535458	1.70567	CASP1,CASP4,PYCARD,RELA,RIPK2,NFKB1,IKBKG,IRAK1,UBC,PANX1,IKBKB,TNFAIP3,NFKB2,CARD9,BIRC2,TXNIP,NLRP1,TXN,BCL2L1,UBB
GO_NEGATIVE_REGULATION_OF_IMMUNE_RESPONSE	0.001992	0.02287	0.494344	1.70404	LGALS3,CD59,COL3A1,ANXA1,IFI16,FOXF1,LOXL3,MICA,CUEDC2,PPARG,GRN,SOCS5,CD55,TNFRSF14,GPX1,IRAK3,IL4R,STAT6,DUSP10,NR1H2,PARP14,PARP3,FAM3A
GO_RESPONSE_TO_CORTICOSTEROID	0.003968	0.030665	0.471384	1.7026	STC1,ASS1,FOSL1,PAM,CDKN1A,ANXA1,ENG,EGFR,SLIT2,CCND1,SERPINF1,ADAM9,PTGS2,COL1A1,FOSB,ZFP36L2,PAPPA,AREG,IGFBP7,NR3C1,BAD,SDC1,DUSP1
GO_ACTIVATION_OF_IMMUNE_RESPONSE	0.001757	0.02287	0.400332	1.70242	LGALS3,CAV1,CTSK,PSMB8,PSMB9,CD59,LPXN,MASP1,CD47,TMEM173,CTSB,C1R,LY96,C1S,IFI16,PRNP,ICOSLG,NFKBIA,CTSL,PSME1,BTN3A2,RFTN1,APPL2,PYCARD,CFH,NFKBIZ,ARPC1B,IRF1,C3,COLEC12,RELB,HMSD,RTN4,WIPF1,PSME2,TNIP1,TANK,SCARA3,CLU,MYO1C,RELA,MEF2C,RIPK2,TICAM1,NFKB1,ARPC1A,GBP1,RBCK1,PAG1,CD55,THEMIS2,IKBKG,PSMF1,IRAK3,CACNB3,RPS6KA3,F2RL1,IKBKE,CYFIP1,CD81,FYN,PRKCE,PSMD9,RAP1A,TIFA,ELF1,RAB7B,IRAK1,UBC,E…
REACTOME_O_GLYCOSYLATION_OF_TSR_DOMAIN_CONTAINING_PROTEINS	0.008214	0.049489	0.615669	1.70216	ADAMTS6,THSD4,THBS2,THBS1,ADAMTSL4,ADAMTS12,ADAMTS2,SEMA5A,SPON2,ADAMTSL5
GO_POSITIVE_REGULATION_OF_PEPTIDASE_ACTIVITY	0.003759	0.030665	0.444748	1.70063	CASP1,CAV1,ASPH,GSN,CASP4,FBLN1,IFI16,DAP,ARL6IP5,PSME1,PCOLCE,TRADD,IFT57,BID,F2R,FAS,PYCARD,MAP3K5,DLC1,RCN3,BAD,PMAIP1,PSME2,PPARG,GRN,TANK,RIPK2,MYC,CRADD,HTRA2
GO_SMOOTH_MUSCLE_CELL_PROLIFERATION	0.003899	0.030665	0.470914	1.6998	APOD,ITGA2,EREG,CDKN1A,PDGFRB,SOD2,JUN,EGFR,AKR1B1,CDH13,IGFBP5,COMT,PTGIR,PTGS2,MMP2,TGFBR2,MAP3K5,THBS1,PPARG,BMP4,ILK,PTEN,MEF2C,PDCD4,KLF4,NAMPT,GNAI2,IRAK1,ANG,STAT1,PPARD,TNFAIP3,AKT1
GO_PHAGOCYTOSIS	0.001842	0.02287	0.432485	1.6988	PTX3,ITGA2,GAS6,CD47,GSN,SRPX,ANXA1,ANXA11,CCL2,AXL,APPL2,PYCARD,IL1B,ARPC1B,C3,COLEC12,THBS1,LRP1,WIPF1,PPARG,MYO1C,PTEN,ITGB1,ARPC1A,SIRPA,GATA2,F2RL1,CYFIP1,FYN,CD302,PRKCE,TMEM175,RAP1A,RAB27A,SYT11,RAB7B,ARPC5,MAPK3,PIP5K1C,NCK1,ABR,SPON2,RAB7A,RAB14,ABL1,ACTR3,CORO1C,RAB34,BRK1,DOCK1,MAPK1,LEPR,ARPC3,CALR,SNX3,MET,MYH9,ARHGAP12
GO_CELL_MOTILITY	0.001575	0.02287	0.370847	1.69857	MMP1,TWIST2,STC1,PLAU,CD44,ECM1,APOD,NBL1,CXCL1,DCN,LGALS3,CAV1,HGF,PRSS3,PHLDA2,APCDD1,SP100,ITGA2,SPHK1,CD248,LMNA,ARID5B,EREG,TSPO,ENPP2,GAS6,SH3KBP1,SLC16A3,IL1R1,CD47,NR2F2,LPAR1,ACKR4,SERPINE2,PDGFRB,RRAS,PLAT,PDGFRA,COL3A1,SOD2,NRP1,ANXA1,JUN,MYLK,ENG,EGFR,FBLN1,SLIT2,CCL2,CPNE3,F10,CDH13,SERPINF1,GPNMB,IGFBP5,AXL,CXCL8,TIMP1,NAV1,BTG1,ADAM9,ATP2B4,MTUS1,SNAI2,SSX2IP,PTGS2,SERPINE1,SFRP1,S…
GO_INTEGRIN_MEDIATED_SIGNALING_PATHWAY	0.003937	0.030665	0.50988	1.69791	ITGA2,CD47,COL3A1,NRP1,TIMP1,ADAM9,EMP2,ITGA5,LOXL3,ITGB1BP1,CD63,ITGA3,ADAM15,DST,COL16A1,ILK,ITGB1,TLN1,ITGBL1,ITGA10
GO_AGING	0.001869	0.02287	0.4154	1.6976	ASS1,APOD,DCN,CD68,TBX3,LMNA,TSPO,CTSC,GSN,MME,CDKN1A,PDGFRB,SOD2,JUN,ENG,TIMP2,PRNP,SERPINF1,IGFBP5,TIMP1,NQO1,ERCC1,PTGS2,CAT,TBX2,SERPINE1,CRYAB,TGFBR2,CDKN2A,GLRX2,LRP1,ILK,ATG7,PTEN,RELA,MBD2,NEK6,PRELP,HMGA2,PDCD4,HTRA2,GSS,ICAM1,LITAF,PLA2R1,HMGA1,DNMBP,SRR,FOS,NAMPT,ERO1A,PML
GO_EXTRINSIC_APOPTOTIC_SIGNALING_PATHWAY	0.001866	0.02287	0.428543	1.69729	LGALS3,CAV1,HGF,SP100,LMNA,NRP1,SRPX,IFI6,TIMP3,SNAI2,SERPINE1,SFRP1,TRADD,BID,TMBIM1,FAS,PYCARD,IL1B,TNFSF12,TNFRSF1A,MCL1,THBS1,STX4,CIB1,BAD,PMAIP1,BMP4,BAG3,AR,PTEN,TNFRSF12A,FGFR1,RELA,G0S2,RBCK1,CRADD,HTRA2,PEA15,ARHGEF2,ICAM1,GPX1,KITLG,GABARAP,IL19,FYN
GO_NEGATIVE_REGULATION_OF_LEUKOCYTE_MIGRATION	0.008386	0.049994	0.631637	1.6969	APOD,NBL1,SLIT2,CCL2,EMILIN1,DUSP1,HOXA7,GREM1,AKT1,ABR
GO_RESPONSE_TO_OXYGEN_LEVELS	0.001808	0.02287	0.405115	1.69325	STC1,PLAU,CAV1,SOD3,ITGA2,PSMB8,PSMB9,CAPN2,LMNA,PAM,LPAR1,CDKN1A,EGR1,PDGFRB,PLAT,PTGS2,CAT,MMP2,SFRP1,PSME1,EPAS1,DPP4,VEGFC,COL1A1,CRYAB,TGFBR2,KCNMA1,FAS,ACVRL1,PLOD1,PTN,THBS1,ADAM15,BAD,BNIP3L,PMAIP1,PSME2,PPARG,TBL2,SIRT2,EDNRA,LDHA,NDRG1,CARD16,LIMD1,PLK3,SLC9A1,PGF,PRKAA1,ATG7,PTEN,MMP14,VASN,MYC,ATP6V0D1,MGARP,ANGPTL4,ICAM1,HP1BP3,PSMF1,CACNB3,VEGFB,MALAT1,APOLD1,PRKCE,BACH1,PSMD9,NAMPT…
KEGG_APOPTOSIS	0.001988	0.02287	0.492874	1.68486	CAPN2,IL1R1,NFKBIA,TRADD,BID,FAS,IL1B,TNFRSF1A,EXOG,BAD,CASP7,RELA,NFKB1,IKBKG,IRAK3,CAPN1,CHP1,IRAK1,TNFRSF10D,IKBKB,PIK3CD,PRKAR1A,AKT1,BIRC2,TNFRSF10B,NGF,PRKACA,PPP3CC
REACTOME_EXTRA_NUCLEAR_ESTROGEN_SIGNALING	0.005917	0.039844	0.507757	1.68462	CAV1,SPHK1,CAV2,EREG,GNG11,EGFR,CCND1,GNG12,MMP2,AREG,MMP3,GNG2,GNB2,FOS,GNAI2,HRAS,SHC1,AKT1,MAPK3,HSPB1
GO_CHONDROCYTE_DIFFERENTIATION	0.002	0.02287	0.476659	1.68136	ECM1,COL6A2,COL6A1,COL6A3,SNAI2,TGFBR2,ACVRL1,HOXA11,OSR2,ANXA2,ADAMTS12,BMP4,EFEMP1,SCARA3,RARG,CREB3L2,FGFR1,RELA,MEF2C,ANXA6,HMGA2,SHOX2,WNT5B,COL27A1,MAF,TRPS1,GREM1,TRIP11,SMAD3,OSR1,COL12A1
GO_INTERLEUKIN_1_MEDIATED_SIGNALING_PATHWAY	0.003824	0.030665	0.467576	1.67875	PSMB8,PSMB9,IL1R1,EGR1,NFKBIA,PSME1,IL1B,PSME2,RELA,RIPK2,NFKB1,IKBKG,PSMF1,IRAK3,SQSTM1,PSMD9,RPS6KA4,IRAK1,UBC,IKBKB,MAPK3
GO_TUMOR_NECROSIS_FACTOR_SUPERFAMILY_CYTOKINE_PRODUCTION	0.001992	0.02287	0.483473	1.67742	TSPO,GAS6,CD47,LY96,GPNMB,AXL,PYCARD,WNT5A,THBS1,NFATC4,CLU,RIPK2,TICAM1,ARHGEF2,ZBTB20,IRAK3,SIRPA,ZFP36,SYT11,MAVS,TNFAIP3,CARD9,BCL10,HSPB1,SPON2,ZC3H12A,ERRFI1
GO_BIOLOGICAL_ADHESION	0.001645	0.02287	0.371654	1.67687	PLAU,CD44,ASS1,APOD,NT5E,COL6A2,LGALS3,CAV1,COL6A1,CLDN11,ITGA2,COL6A3,LPXN,GAS6,CD47,LGALS1,GSN,CD99,RGMB,TRIOBP,SERPINE2,PDGFRA,COL3A1,NRP1,SRPX,ANXA1,ENG,FBLN2,EGFR,FBLN1,CCL2,SSPN,IL6ST,APBB1IP,COL15A1,PRNP,TGFB1I1,CDH13,TPBG,GPNMB,SERPINB8,AXL,CXCL8,ADGRE5,ICOSLG,COL13A1,ADAM9,SNAI2,CEBPB,SSX2IP,NTM,SERPINE1,FBN1,TNC,SFRP1,CERCAM,STXBP6,DPP4,EMP2,COL1A1,DDR2,TGFBR2,LAMA4,DOCK5,COL8A1,ITGA5,C…
GO_TUBE_MORPHOGENESIS	0.001698	0.02287	0.378165	1.67662	ANPEP,ECM1,APOD,DCN,PRRX1,CAV1,HGF,TBX3,ARHGAP22,SP100,SPHK1,EREG,ENPP2,ZEB1,NR2F2,ARHGAP24,PDGFRB,RRAS,PDGFRA,COL3A1,HSPB6,NRP1,FAM129B,ANXA1,JUN,JUNB,MYLK,ENG,EGFR,SLIT2,CCL2,ELK3,COL15A1,CDH13,SERPINF1,GPNMB,CXCL8,BTG1,TYMP,RNH1,PTGS2,TBX2,SERPINE1,TNC,MMP2,SFRP1,EPAS1,VEGFC,EMP2,CTSZ,IFT57,DLL4,CTHRC1,TGFBR2,COL8A1,ITGA5,ACVRL1,CSPG4,FOXF1,EMILIN1,THBS2,IL1B,SASH1,AREG,HOXA11,LOX,TNFSF12,TBX5…
GO_CYTOKINE_PRODUCTION	0.001761	0.02287	0.385526	1.67261	APOD,CASP1,HGF,LUM,SPHK1,CAPN2,EREG,TSPO,GAS6,IL1R1,CD47,TMEM173,LTBP1,EGR1,ANXA1,LY96,IL6ST,IFI16,B2M,PRNP,GPNMB,AXL,SNAI2,CEBPB,PTGS2,SERPINE1,HOMER3,SRGN,POLR3GL,BTN3A2,RFTN1,CXCL6,F2R,UBE2L6,ANXA4,APPL2,PYCARD,IL1B,GSDMD,TWSG1,S100A13,IRF1,WNT5A,C3,THBS1,RELB,LRP1,CCBE1,CUEDC2,AGPAT2,NFATC4,NAV3,LIPA,CARD16,CLU,MAPKBP1,FGFR1,RELA,RIPK2,TICAM1,NFKB1,GBP1,MAP2K3,TRIM16,PDCD4,SOCS5,CD55,ARHGEF2,…
GO_LOCOMOTION	0.001567	0.02287	0.362424	1.67234	MMP1,TWIST2,STC1,PLAU,CD44,ECM1,APOD,NBL1,CXCL1,DCN,LGALS3,CAV1,HGF,PRSS3,PHLDA2,PLAUR,FOSL1,APCDD1,SP100,ITGA2,PLP2,SPHK1,CD248,CAV2,LMNA,ARID5B,EREG,TSPO,ENPP2,GAS6,SH3KBP1,SLC16A3,IL1R1,CD47,NR2F2,CHN1,LPAR1,ACKR4,SERPINE2,PDGFRB,RRAS,PLAT,PDGFRA,COL3A1,SOD2,NRP1,FAM129B,ANXA1,JUN,MYLK,ENG,EGFR,FBLN1,SLIT2,CCL2,CPNE3,F10,CDH13,SERPINF1,GPNMB,IGFBP5,AXL,CXCL8,TIMP1,NAV1,BTG1,ADAM9,TYMP,ATP2B4,M…
GO_REGULATION_OF_ENDOTHELIAL_CELL_MIGRATION	0.003752	0.030665	0.441636	1.6723	STC1,DCN,SP100,NR2F2,NRP1,ANXA1,SLIT2,SERPINF1,PTGS2,VEGFC,EMP2,DLL4,ACVRL1,PLPP3,SASH1,WNT5A,THBS1,ITGB1BP1,CIB1,PPARG,BMP4,SPRED1,GRN,GLUL,FGFR1,MEF2C,MAP2K3,PRKCA,AMOTL1,BMPER,GATA2,RHOB,KLF4,SRPX2,SEMA5A,ZNF580,CD40,NF1
GO_COPII_COATED_VESICLE_BUDDING	0.007859	0.048381	0.498391	1.67128	CD59,CTSC,CTSZ,CNIH3,AREG,INSIG1,ANKRD28,TRAPPC1,SEC31A,SEC24D,SEC23A,SAR1B,MCFD2,TMED10,CSNK1D,TRAPPC3,CNIH1,PDCD6,STX5,SEC13,GRIA1,SEC22B,RAB1B,VAPA,COL7A1,LMAN1,SAR1A,GOLGA2,TRAPPC4,NSF,TFG,SEC24C,TRAPPC9,RAB1A
GO_LEUKOCYTE_CHEMOTAXIS	0.003937	0.030665	0.461584	1.67123	NBL1,CXCL1,LGALS3,GAS6,ANXA1,SLIT2,CCL2,CXCL8,MTUS1,SERPINE1,VEGFC,CCL7,CXCL6,IL1B,LYST,HSD3B7,RAC2,WNT5A,THBS1,SBDS,DUSP1,PGF,CSF1,CKLF,F2RL1,VEGFB,CH25H,CREB3,MPP1,IL17RC,ZNF580,GREM1,CXCL3,PIK3CD,MAPK3,PIP5K1C
GO_REGULATION_OF_PROTEOLYSIS	0.001733	0.02287	0.382556	1.67104	CD44,ECM1,CASP1,CAV1,HGF,PLAUR,COL6A3,PSMB8,PSMB9,ASPH,GAS6,CAST,CTSC,GSN,SERPINE2,CAMK2N1,PLAT,CST3,CASP4,TIMP2,FBLN1,IFI16,CD109,IFI6,PRNP,MAP1A,SERPINF1,SERPINB8,DAP,TIMP3,TIMP1,ADAM9,TFPI,PTGS2,SERPINE1,ARL6IP5,LXN,PSME1,SERPINB6,PCOLCE,TRADD,CTSZ,LTBP4,IFT57,CRYAB,BID,F2R,FAS,PYCARD,IL1B,CHAC1,DAB2,MAP3K5,C3,THBS1,DLC1,RCN3,ANXA2,TMEM59,CCBE1,BAD,HMSD,GAS1,PMAIP1,PSME2,PPARG,SIRT2,PBK,TNIP1,…
GO_NEGATIVE_REGULATION_OF_CELL_ADHESION	0.001862	0.02287	0.419987	1.6671	ASS1,APOD,LGALS3,LPXN,LGALS1,SERPINE2,ANXA1,FBLN1,PRNP,CDH13,GPNMB,SNAI2,CEBPB,SERPINE1,TNC,COL1A1,ACVRL1,LOXL3,TWSG1,C1QTNF1,CDKN2A,IRF1,THBS1,FXYD5,ITGB1BP1,DLC1,LRP1,ADAM15,ARHGDIA,BMP4,DUSP1,PTEN,MMP14,GBP1,SOCS5,CD9,PAG1,PLXND1,TNFRSF14,SDC4,CD164,IL4R,UBASH3B,PLXNB2,SPOCK1,KLF4,MAD1L1,SEMA5A,PPM1F,HOXA7,ARHGAP6,NF1,RUNX1,PPARA,MYADM,PRKAR1A,AKT1
GO_REGULATION_OF_T_CELL_ACTIVATION	0.001908	0.02287	0.423509	1.66632	LGALS3,CAV1,ZEB1,CD47,LGALS1,GSN,ANXA1,CCL2,IL6ST,PRNP,GPNMB,ICOSLG,CEBPB,DPP4,TGFBR2,PYCARD,LOXL3,IL1B,TWSG1,NFKBIZ,IRF1,RAC2,BAD,BMP4,PRDM1,RIPK2,SOCS5,PAG1,CD55,TNFRSF14,SDC4,SIRPA,IL4R,CD83,FYN,DUSP10,MAD1L1
GO_PLATELET_DERIVED_GROWTH_FACTOR_RECEPTOR_SIGNALING_PATHWAY	0.008032	0.049049	0.51687	1.66538	APOD,ARID5B,PDGFRB,PLAT,PDGFRA,NRP1,PDGFRL,PTGIR,LOX,LRP1,PTEN
GO_SECRETION	0.001563	0.02287	0.363822	1.66538	ANPEP,POU2F2,STC1,PLAU,CD44,ECM1,PTX3,CASP1,CXCL1,LGALS3,CAV1,CD68,HGF,MVP,TBX3,PRSS3,PLAUR,CD59,WLS,GLIPR1,PAM,GAS6,DPP7,CD47,TMEM173,CTSC,GSN,CTSB,MME,SERPINE2,CST3,FAM129B,ANXA1,ENG,TIMP2,EGFR,CPNE3,CD109,B2M,CCND1,AXL,ADGRE5,COMMD3,TIMP3,TIMP1,COMT,ADAM9,CAT,SERPINE1,SFRP1,SERPINB6,TSPAN14,STXBP6,BDKRB2,DPP4,VEGFC,CTSZ,LTBP4,SRGN,BTN3A2,F2R,TMBIM1,ANXA4,TAGLN2,PYCARD,PFKL,NTSR1,FOXF1,IL1B,CYB…
GO_REGULATION_OF_BODY_FLUID_LEVELS	0.001808	0.02287	0.399714	1.66515	PLAU,CAV1,PLAUR,ITGA2,CD59,PAM,GAS6,SERPINE2,EHD3,EHD2,PLAT,PDGFRA,COL3A1,MAFF,FBLN1,SH2B3,CCND1,AKR1B1,F10,PROCR,AXL,TFPI,SERPINE1,COL1A2,EMP2,COL1A1,F2R,EHD1,C1QTNF1,IRF1,THBS1,ANXA2,FAP,SLC22A4,SOCS2,VKORC1,GNG2,ILK,CLIC1,IRF2,CAPZB,PRKCA,C1GALT1C1,TLN1,ANXA5,CD9,GATA2,F2RL1,UBASH3B,FYN,PRKCE,NR1H2,FIBP,RAB27A,F2RL2,CAPZA1,GNAI2,FLNA,ITPR3,HMG20B,CSRP1,CD40,ADM,GBA,MICAL1,PIK3CD
GO_RESPONSE_TO_METAL_ION	0.00188	0.02287	0.406473	1.6648	TNFRSF11B,ASS1,CAV1,SOD3,S100A16,MT2A,TSPO,PAM,GSN,JUN,JUNB,ANXA11,EGFR,CPNE3,B2M,CCND1,PRNP,SERPINF1,PTGES,ADAM9,NQO1,ERCC1,PTGS2,CAT,SLC39A13,FOSB,KCNMA1,G6PD,ACO1,S100A13,CYBRD1,WNT5A,THBS1,BAD,TFAP2A,SDC1,NFATC4,MAP1LC3A,NDRG1,DUSP1,PRKAA1,PTEN,MEF2C,ANXA5,MT1E,APBB1,GSS,ICAM1
HALLMARK_ALLOGRAFT_REJECTION	0.003968	0.030665	0.460496	1.66327	EREG,CD47,TAPBP,EGFR,CCL2,B2M,ICOSLG,TIMP1,SRGN,CCL7,F2R,FAS,IL1B,TAP1,CDKN2A,DEGS1,IFNGR2,CAPG,GBP2,RIPK2,CSF1,SOCS5,APBB1,ICAM1,CCND3,IL4R,TAP2,IL11,FLNA,CD40,STAT1,EIF3D,IKBKB,DYRK3,AKT1,BCL10,NCK1
GO_PROTEIN_DEPOLYMERIZATION	0.003984	0.030665	0.479147	1.66241	ASPH,GSN,TRIOBP,MAP1A,CFL2,TWF2,EPS8,STMN2,LIMA1,TMOD3,CIB1,CAPG,NAV3,TWF1,CAPZB,NES,ARHGEF2,F2RL1,MTPN,CAPZA1,DSTN,SEMA5A,MICAL1
GO_ENTRY_INTO_OTHER_ORGANISM_INVOLVED_IN_SYMBIOTIC_INTERACTION	0.003876	0.030665	0.463433	1.66179	ANPEP,PTX3,CAV1,ITGA2,CAV2,GAS6,LGALS1,GSN,CTSB,EGFR,AXL,CXCL8,DPP4,ITGA5,IFITM2,SCARB2,TRIM8,ITGB1,CD55,TNFRSF14,ICAM1
HALLMARK_MYOGENESIS	0.003676	0.030665	0.425542	1.66149	APOD,COL6A2,SOD3,COL6A3,SPHK1,GSN,CDKN1A,COL3A1,MYLK,SSPN,COL15A1,PRNP,CDH13,COX7A1,WWTR1,AEBP1,NQO1,BDKRB2,COL1A1,CRYAB,LPIN1,FABP3,SMTN,IGFBP7,CRAT,AK1,SIRT2,CLU,MYO1C,KIFC3,SGCD,ITGB1,FST,MEF2C,TPM2,FDPS,BIN1,FHL1,PDE4DIP,PLXNB2,SVIL,RB1,MAPRE3,GABARAPL2,SORBS3,GAA
GO_CELLULAR_RESPONSE_TO_ACID_CHEMICAL	0.003759	0.030665	0.432236	1.66145	ASS1,COL6A1,CAPN2,PID1,ZEB1,EGR1,PDGFRA,COL3A1,EGFR,SERPINF1,CEBPB,TNC,MMP2,SFRP1,COL1A2,COL1A1,TWF2,WNT5A,RRAGA,PPARG,NFATC4,COL16A1,GNG2,RARG,PRKAA1,HTRA2,WNT5B,FYN,PRKCE,KLF4,AKR1C1
GO_SKELETAL_SYSTEM_DEVELOPMENT	0.001779	0.02287	0.390334	1.65955	TNFRSF11B,STC1,CD44,ECM1,COL6A2,PRRX1,COL6A1,LUM,TBX3,CTSK,IGFBP4,COL6A3,ARID5B,ZEB1,PDGFRA,COL3A1,TMEM119,ENG,MSX1,COL13A1,TIMP1,SNAI2,FBN1,MMP2,SFRP1,COL1A2,COL1A1,TGFBR2,ACVRL1,HOXA11,LOX,INSIG1,OSR2,EXT1,WNT5A,HOXA10,ANXA2,ADAMTS12,VKORC1,TFAP2A,HOXA9,BMP4,FAM20C,EFEMP1,SBDS,THRA,SCARA3,RARG,CREB3L2,MMP14,FGFR1,RELA,MEF2C,PRELP,HAND2,ANXA6,HMGA2,NAB2,SHOX2,MEIS1,HEXB,WNT5B,SHOX,PITX1
GO_POSITIVE_REGULATION_OF_LEUKOCYTE_MIGRATION	0.003968	0.030665	0.486325	1.65931	LGALS3,ITGA2,GAS6,IL1R1,CXCL8,SERPINE1,VEGFC,CCL7,PYCARD,RAC2,WNT5A,THBS1,PGF,MMP14,CSF1,TNFRSF14,ICAM1,KITLG,F2RL1,VEGFB,CREB3
GO_POSITIVE_REGULATION_OF_DEFENSE_RESPONSE	0.001815	0.02287	0.396478	1.65515	CAV1,CTSK,ITGA2,PSMB8,PSMB9,EREG,CD47,TMEM173,CTSB,OPTN,LY96,EGFR,IL6ST,IFI16,CEBPB,PTGS2,NFKBIA,SERPINE1,CTSL,PSME1,TRADD,RFTN1,APPL2,PYCARD,IL1B,NFKBIZ,TNFRSF1A,MICA,IRF1,WNT5A,C3,COLEC12,RELB,RTN4,PSME2,TNIP1,GRN,TANK,RELA,MEF2C,RIPK2,TICAM1,NFKB1,OSMR,PDCD4,IKBKG,PSMF1,IRAK3,RPS6KA3,F2RL1,IKBKE,FYN,PRKCE,PSMD9,TIFA,RAB7B,IRAK1,UBC,IL17RC,MAPKAPK3,TRAF3,HRAS,HSPA1A,IKBKB,MAVS,TNFAIP3,FLOT1,CAR…
GO_NEGATIVE_REGULATION_OF_RESPONSE_TO_STIMULUS	0.001582	0.02287	0.35898	1.65364	PLAU,CD44,ECM1,APOD,NBL1,NT5E,DCN,LGALS3,CAV1,HGF,PLAUR,IGFBP4,IGFBP6,APCDD1,PSMB8,PSMB9,CD59,LPXN,CAV2,VEPH1,PID1,LMNA,EREG,GAS6,SH3KBP1,DKK3,CD47,LTBP1,LPAR1,CARD19,RGS3,CDKN1A,EGR1,SERPINE2,CAMK2N1,RGS10,PLAT,PDGFRA,OPTN,COL3A1,SOD2,NRP1,FAM129B,ANXA1,LY96,TIMP2,HTRA1,NUCB2,EGFR,FBLN1,SLIT2,CCL2,IFI16,RGS17,CD109,IFI6,PRNP,TGFB1I1,SERPINF1,IGFBP5,CXCL8,TIMP3,PTGIR,WWTR1,ATP2B4,SNAI2,ERCC1,TFPI…
GO_RESPONSE_TO_INORGANIC_SUBSTANCE	0.001792	0.02287	0.386967	1.65301	TNFRSF11B,ASS1,CAV1,HGF,FOSL1,SOD3,S100A16,SPHK1,CAPN2,MT2A,TSPO,PAM,GSN,PDGFRB,SOD2,ANXA1,JUN,JUNB,ANXA11,EGFR,CPNE3,B2M,CCND1,PRNP,AKR1B1,SERPINF1,AXL,PTGES,ADAM9,ATP2B4,NQO1,ERCC1,PTGS2,CAT,COL1A1,CRYAB,SLC39A13,FOSB,KCNMA1,G6PD,ACO1,AREG,S100A13,CYBRD1,MAP3K5,GLRX2,WNT5A,THBS1,MMP3,BAD,TFAP2A,SDC1,NFATC4,MAP1LC3A,LDHA,NDRG1,DUSP1,COL18A1,PRKAA1,ATG7,PTEN,RELA,MEF2C,ANXA5,CD9,LRP11,MT1E,APBB1,…
GO_BIOMINERAL_TISSUE_DEVELOPMENT	0.003876	0.030665	0.460524	1.65135	ECM1,SLC20A1,GAS6,TMEM119,GPNMB,CEBPB,PTGS2,COL1A2,COL1A1,SRGN,DDR2,LOX,FAM20A,OSR2,GPM6B,PTN,ITGB1BP1,ANXA2,TFAP2A,BMP4,FAM20C,SBDS,MEF2C,ANXA6
GO_LIPID_OXIDATION	0.00404	0.030665	0.478271	1.64958	APOD,APPL2,FABP3,DECR1,C1QTNF2,CRAT,ECI2,PPARG,HADHB,SCP2,ACADVL,ETFA,PRKAA1,ACOX2,CPT1C,ECHDC2,ACAT1,ETFB,ACAA1,PHYH,LONP2,PPARD,PPARA,AKT1,MCAT,HADHA,CYGB
GO_TISSUE_MIGRATION	0.001866	0.02287	0.402369	1.64953	STC1,DCN,PRSS3,SP100,ITGA2,ENPP2,NR2F2,NRP1,ANXA1,JUN,SLIT2,CDH13,SERPINF1,ADAM9,PTGS2,DPP4,VEGFC,EMP2,DLL4,TGFBR2,DOCK5,ACVRL1,FOXF1,PLPP3,SASH1,TNFSF12,WNT5A,THBS1,ITGB1BP1,ITGA3,CIB1,FAP,RTN4,PPARG,KANK2,BMP4,SPRED1,GRN,PXN,ZEB2,GLUL,PTEN,ITGB1,FGFR1,MEF2C,MAP2K3,PRKCA,S100A2,PLXND1,GPX1,AMOTL1,BMPER,GATA2,RHOB,RAB13,PRKCE,KLF4,DUSP10,SRPX2,NR4A1,SEMA5A,ZNF580,PPM1F,CD40,NF1
GO_POSITIVE_REGULATION_OF_LEUKOCYTE_CELL_CELL_ADHESION	0.003854	0.030665	0.440999	1.64682	CD44,CAV1,CD47,LGALS1,ANXA1,CCL2,IL6ST,ICOSLG,DPP4,TGFBR2,PYCARD,IL1B,NFKBIZ,BAD,RELA,RIPK2,SOCS5,CD55,TNFRSF14,ICAM1,SIRPA,IL4R,CD83,FYN,DUSP10,IRAK1,NFAT5,RUNX1,AKT1,BCL10,NCK1
GO_RESPONSE_TO_HYDROGEN_PEROXIDE	0.003914	0.030665	0.447076	1.64265	HGF,FOSL1,SPHK1,CAPN2,PDGFRB,ANXA1,JUN,AXL,ADAM9,NQO1,CAT,COL1A1,CRYAB,AREG,MAP3K5,GLRX2,BAD,SDC1,MAP1LC3A,LDHA,DUSP1,PRKAA1,RELA,GPX1,SIRPA,STAT6,SIGMAR1,FYN,RHOB,KLF4
GO_OSSIFICATION	0.001832	0.02287	0.39599	1.64205	TWIST2,STC1,ECM1,CLEC11A,HGF,COL6A1,CTSK,TMEM119,JUNB,EGFR,IL6ST,GPNMB,IGFBP5,COL13A1,WWTR1,SNAI2,CEBPB,PTGS2,CAT,TNC,MMP2,SFRP1,COL1A2,COL1A1,SRGN,DDR2,CTHRC1,FHL2,AREG,LOX,OSR2,BCAP29,TWSG1,GPM6B,EXT1,PTN,WNT5A,TFAP2A,BMP4,FAM20C,SBDS,THRA,LIMD1,ILK,FZD1,CLIC1,MMP14,MEF2C,HAND2,ZHX3,NAB2,CSF1,SHOX2
GO_CELLULAR_RESPONSE_TO_MECHANICAL_STIMULUS	0.003945	0.030665	0.497786	1.63873	CASP1,ITGA2,ENG,EGFR,PTGS2,COL1A1,FAS,IL1B,TNFRSF1A,IRF1,GADD45A,BAD,PIEZO1,BAG3,SLC9A1,NFKB1,CRADD
REACTOME_TNFR2_NON_CANONICAL_NF_KB_PATHWAY	0.005964	0.039864	0.479302	1.63846	TNFRSF11B,PSMB8,PSMB9,PSME1,TNFSF12,TNFRSF1A,RELB,PSME2,TNFRSF12A,TNFRSF14,PSMF1,PSMD9,UBC,CD40,TRAF3,NFKB2,EDA2R,BIRC2
GO_FATTY_ACID_METABOLIC_PROCESS	0.003788	0.030665	0.415619	1.63559	MGLL,CAV1,PTGS1,PAM,PTGES,ELOVL1,PTGS2,APPL2,FABP3,DECR1,CRYL1,ZADH2,TNFRSF1A,CBR1,C3,C1QTNF2,CRAT,ECI2,PPARG,HADHB,SCP2,ACADVL,ETFA,PRKAA1,CES2,ACOX2,CPT1C,GPX1,ECHDC2,ACAT1,ABHD5,FADS2,ETFB,ACAA1,PHYH,ACSL4,LONP2,PPARD,PPARA,AKT1,MAPK3,MCAT,HADHA,PTGIS,MSMO1,CYGB,PDK2
GO_POSITIVE_REGULATION_OF_CELL_SUBSTRATE_ADHESION	0.003953	0.030665	0.462293	1.63302	TRIOBP,NRP1,FBLN2,CDH13,SFRP1,EMP2,DOCK5,COL8A1,ITGA5,FOXF1,EMILIN1,PTN,ITGB1BP1,NINJ1,S100A10,ITGA3,CIB1,COL16A1,ILK,NID1,RSU1,CSF1,SDC4,PRKCE,FLNA,PPM1F,FMN1,SMAD3,EMILIN2,MYADM,ARL2,ABI3BP,ROCK1,ABL1,PLEKHA2
GO_NEGATIVE_REGULATION_OF_TRANSPORT	0.001821	0.02287	0.391885	1.63273	STC1,APOD,LGALS3,CAV1,SP100,PID1,GAS6,CD47,SERPINE2,ANXA1,MDFIC,GEM,COMT,PTGS2,PXK,ARL6IP5,SFRP1,STXBP6,SRGN,CRYAB,F2R,ANXA4,APPL2,PFKL,NTSR1,FOXF1,IL1B,PKIG,INSIG1,GPM6B,TNFRSF1A,THBS1,ITGB1BP1,TMEM14A,RGS2,CARD16,BAG3,GSTO1,MAPKBP1,PTEN,NFKB1,GBP1,ANXA5,PEA15,ICAM1,BIN1,PPP1R11,RAP1B,SIRPA,CACNB3,PLA2R1,SSC5D,F2RL1,CYFIP1,NDUFAF2,OS9,PRKCE,RHBDF2,PSMD9,NR1H2,RAP1A,RAB11FIP5,ENPP1,CHP1,PML,RHBDF…
REACTOME_ER_TO_GOLGI_ANTEROGRADE_TRANSPORT	0.003752	0.030665	0.427933	1.6327	CD59,CTSC,KDELR3,COPZ2,CTSZ,DCTN3,CNIH3,AREG,ANKRD28,TUBA1A,CAPZB,TUBB6,COPG1,TMED3,TRAPPC1,CD55,ARFGAP3,SEC31A,SEC24D,SEC23A,SAR1B,MCFD2,TUBB4B,CAPZA1,COPB2,KDELR2,TMED7,DCTN2,TMED10,DCTN6,CSNK1D,TRAPPC3,ANK1,CNIH1,TMEM115,DYNC1I2,STX5,SEC13,GRIA1,COG1,ACTR1A,SEC22B,RAB1B,DYNC1H1,SEC22A,CAPZA2,NAPG,ACTR10,TMED9,ARF1,COL7A1,LMAN1,COPA,COPB1,TUBA1C,GOLGA2,TUBA1B,DYNC1LI1,GBF1,TRAPPC4,DCTN1,NSF,TFG…
GO_T_CELL_ACTIVATION	0.001838	0.02287	0.396163	1.63244	CD44,LGALS3,CAV1,ZEB1,CD47,LGALS1,GSN,EGR1,ANXA1,CCL2,IL6ST,APBB1IP,B2M,PRNP,GPNMB,ICOSLG,CEBPB,DPP4,DLL4,ZFP36L2,TGFBR2,PYCARD,LOXL3,IL1B,TWSG1,NFKBIZ,MICA,IRF1,RAC2,CD151,RELB,BAD,BMP4,MSN,PRDM1,RIPK2,SOCS5,PAG1,CD55,TNFRSF14,SDC4,ICAM1,SIRPA,CCND3,IL4R,STAT6,F2RL1,CD83,FYN,DUSP10,MAD1L1,ZFP36L1,RAB27A
GO_ENDOTHELIUM_DEVELOPMENT	0.00198	0.02287	0.464894	1.63224	STC1,ZEB1,GSTM3,NR2F2,NRP1,ENG,BTG1,ACVRL1,IL1B,PLOD3,TNFRSF1A,PTN,ANXA2,ADAMTS12,BMP4,S1PR2,COL18A1,MSN,ICAM1,GPX1,RAP1B,F2RL1,RHOB,APOLD1,RAP1A,CCM2,IKBKB,MYADM,FGF1,ACVR1,HEG1
KEGG_LYSOSOME	0.003922	0.030665	0.445581	1.63039	CD68,CTSK,CTSC,CTSB,CTSL,CTSZ,CTSA,SMPD1,TCIRG1,SCARB2,AP1S1,CD63,CLTB,LIPA,LAMP2,ATP6V0D1,ARSG,HEXB,AP1M1,HGSNAT,CD164,TPP1,IDUA,IDS,GAA,GALNS,AP3S1,NAGA,SUMF1,HEXA,GBA,GNS,AP1B1,ARSA,SGSH,GNPTG
GO_BONE_DEVELOPMENT	0.003795	0.030665	0.416314	1.62589	STC1,COL6A2,COL6A1,COL6A3,TMEM119,ENG,MSX1,COL13A1,FBN1,COL1A1,TGFBR2,HOXA11,LOX,INSIG1,OSR2,ANXA2,VKORC1,TFAP2A,BMP4,FAM20C,SBDS,SCARA3,RARG,MMP14,MEF2C,ANXA6,NAB2,SHOX2,MEIS1
GO_TUBE_DEVELOPMENT	0.001656	0.02287	0.362589	1.62493	ANPEP,ECM1,ASS1,APOD,DCN,PRRX1,CAV1,HGF,TBX3,ARHGAP22,SP100,SPHK1,CLMP,EREG,ENPP2,ZEB1,NR2F2,MME,CDKN1A,SERPINE2,ARHGAP24,PDGFRB,RRAS,PDGFRA,COL3A1,HSPB6,NRP1,FAM129B,ANXA1,JUN,JUNB,MYLK,ENG,EGFR,SLIT2,CCL2,ELK3,COL15A1,AKR1B1,CDH13,SERPINF1,GPNMB,IGFBP5,CXCL8,WWTR1,BTG1,TYMP,RNH1,PTGS2,CAT,TBX2,SERPINE1,TNC,MMP2,SFRP1,EPAS1,VEGFC,EMP2,CTSZ,IFT57,DLL4,CTHRC1,TGFBR2,COL8A1,ITGA5,ACVRL1,CSPG4,FOXF1…
GO_RESPONSE_TO_KETONE	0.003738	0.030665	0.423845	1.62325	ASS1,CAV1,FOSL1,TSPO,CDKN1A,EGFR,SLIT2,CCND1,AKR1B1,SERPINF1,TNC,SFRP1,FOSB,IGFBP7,PTN,THBS1,NR3C1,ADAM15,BAD,PPARG,GNG2,DUSP1,MSN,AHR,AR,PRKAA1,RELA
GO_CELLULAR_RESPONSE_TO_LIPID	0.001783	0.02287	0.37872	1.62274	STC1,ASS1,CASP1,CXCL1,CD68,ITGA2,CAPN2,PID1,TSPO,NR2F2,VIM,LPAR1,FAM210B,ANXA1,LY96,EGFR,CCL2,TGFB1I1,SERPINF1,AXL,CXCL8,ADAM9,SNAI2,CEBPB,TFPI,NFKBIA,SERPINE1,TNC,SFRP1,COL1A1,TWF2,ZFP36L2,CXCL6,FHL2,PYCARD,IL1B,SASH1,INSIG1,DAB2,PTN,WNT5A,NR3C1,ADAM15,BAD,PPARG,KANK2,BMP4,NFATC4,CARD16,THRA,GNG2,MSN,CLU,AHR,AR,RARG,PRKAA1,RELA,MEF2C,RIPK2,TADA3,ZBTB7A,TICAM1,NFKB1,PRKCA,PDCD4,MGARP,HTRA2,CD55,I…
GO_ADHERENS_JUNCTION_ASSEMBLY	0.004008	0.030665	0.467538	1.62192	APOD,ITGA2,NRP1,SFRP1,ACVRL1,SLK,GPM6B,THBS1,ITGB1BP1,DLC1,LRP1,S100A10,COL16A1,SLC9A1,PTEN,MMP14,SDC4,PPM1F,ARHGAP6,ACTN1,GREM1,FMN1,SMAD3,PIP5K1C,CTTN,RHOD,TRIP6,ROCK1,ABL1,CORO1C,ZNF703
REACTOME_TRANSCRIPTIONAL_REGULATION_BY_RUNX2	0.003945	0.030665	0.445085	1.62177	TWIST2,LGALS3,PSMB8,PSMB9,CDKN1A,CCND1,WWTR1,PSME1,COL1A1,ITGA5,NR3C1,PSME2,AR,HIVEP3,HAND2,ITGBL1,PSMF1,RB1,PSMD9,MAF,UBC,STAT1,RUNX1,AKT1,MAPK3
GO_ACTIN_POLYMERIZATION_OR_DEPOLYMERIZATION	0.003731	0.030665	0.414448	1.62101	CDC42EP3,GSN,TRIOBP,CIT,SLIT2,CDC42EP2,CFL2,TWF2,ARHGAP18,EPS8,CDC42EP5,PYCARD,LIMA1,ARPC1B,CDC42EP1,TMOD3,WIPF1,CAPG,TWF1,MYO1C,CAPZB,ARPC1A,SNX9,ICAM1,BIN1,F2RL1,CYFIP1,MTPN,MSRB2,PRKCE,MICALL2,CAPZA1,TMSB10,CDC42EP4,DSTN,ANG,SEMA5A,ARHGAP6,MICAL1,ARPC5,FMN1,MYADM,SSH1,NCK1,CTTN,ARHGAP35,RICTOR,EVL,WASF3,ARF6,SSH2,ACTR3,PLEKHH2,ARPIN,FHOD3
GO_NEGATIVE_REGULATION_OF_VIRAL_PROCESS	0.007921	0.048632	0.485068	1.62037	PTX3,GSN,JUN,IFI16,C19orf66,IFITM2,ISG20,CHMP3,TNIP1,APOBEC3C,TRIM8,HMGA2,IFIT5,ZFP36,TRIM25,OAS3,FAM111A,PML,STAT1,MAVS,IFITM3
GO_GRANULOCYTE_MIGRATION	0.005859	0.039844	0.48886	1.61952	CXCL1,LGALS3,IL1R1,ANXA1,SLIT2,CCL2,CXCL8,CCL7,CXCL6,IL1B,RAC2,THBS1,CSF1,CKLF,JAGN1,MPP1,IL17RC,CXCL3,PIK3CD,MAPK3,PIP5K1C,CD99L2
GO_PATTERN_RECOGNITION_RECEPTOR_SIGNALING_PATHWAY	0.003752	0.030665	0.428435	1.61865	CAV1,CTSK,TMEM173,CTSB,LY96,NFKBIA,CTSL,RFTN1,APPL2,IRF1,COLEC12,RTN4,TNIP1,TANK,RELA,RIPK2,TICAM1,IKBKG,IRAK3,RPS6KA3,F2RL1,IKBKE,PRKCE,TIFA,RAB7B,IRAK1,UBC,MAPKAPK3,TRAF3,HSPA1A,IKBKB,TNFAIP3,FLOT1,BCL10,BIRC2
GO_NEGATIVE_REGULATION_OF_DEFENSE_RESPONSE	0.003846	0.030665	0.432782	1.61794	APOD,NT5E,HGF,HTRA1,IFI16,SERPINF1,APPL2,PYCARD,FOXF1,TNFRSF1A,MICA,CUEDC2,PPARG,SIRT2,PBK,GRN,METRNL,MAPKBP1,NFKB1,PDCD4,SOCS5,TNFAIP6,GPX1,IRAK3,SIRPA,MVK,KLF4,RB1,DUSP10,NR1H2,PARP14,TRIM38,FNDC4,FAM3A,PPARD,PPARA,GBA,SMAD3,TNFAIP3
REACTOME_GLYCOSAMINOGLYCAN_METABOLISM	0.003937	0.030665	0.451167	1.61685	CD44,DCN,LUM,CSPG4,DSEL,EXT1,BGN,ST3GAL4,GPC1,SDC1,SLC35B2,CHPF2,SLC9A1,HS3ST3A1,CHST2,PRELP,B3GAT3,SDC4,HEXB,HGSNAT,IDUA,GLCE,CEMIP,HS2ST1,IDS,CHP1,CHST15,GALNS,HS3ST3B1,HEXA,SLC35B3,B4GALT1,GNS,ST3GAL3,B4GAT1,SGSH,PAPSS2,B4GALT2,EXT2
GO_RESPONSE_TO_NITROGEN_COMPOUND	0.001669	0.02287	0.361299	1.61262	STC1,ASS1,CAV1,CD68,COL6A1,FOSL1,ITGA2,CAPN2,CAV2,PID1,EREG,TSPO,ZEB1,TMEM173,GSTM3,GSN,VIM,CDKN1A,EGR1,RGS10,PDGFRA,COL3A1,ANXA1,CASP4,JUN,JUNB,EGFR,SLIT2,RGS17,CCND1,PRNP,AKR1B1,CDH13,IGFBP5,TIMP1,NNMT,ATP2B4,NQO1,CEBPB,PTGS2,CAT,NFKBIA,FBN1,MMP2,SFRP1,COL1A2,COL1A1,FOSB,RFTN1,LPIN1,APPL2,FABP3,IL1B,AREG,PTN,MAP3K5,COLEC12,SMPD1,RRAGA,TCIRG1,RALB,LRP1,MMP3,BAD,HHEX,HPRT1,PMAIP1,SOCS2,PPARG,CASP…
GO_REGULATION_OF_SUPRAMOLECULAR_FIBER_ORGANIZATION	0.001815	0.02287	0.388781	1.61237	CDC42EP3,CD47,GSN,LPAR1,TRIOBP,NRP1,CIT,SLIT2,MAP1A,AEBP1,CDC42EP2,SFRP1,CRYAB,CFL2,TWF2,ARHGAP18,EPS8,CDC42EP5,PYCARD,RHOC,EMILIN1,STMN2,LIMA1,ARPC1B,CDC42EP1,ITGB1BP1,DLC1,S100A10,TMOD3,CIB1,WIPF1,CAPG,NAV3,TWF1,PXN,CLU,SLC9A1,MYO1C,MEF2C,CAPZB,FHOD1,ARPC1A,SNX9,ARHGEF2,SDC4,ICAM1,BIN1,GPX1,F2RL1,CYFIP1,MTPN,NIN,PRKCE,RB1,SORBS3,CAPZA1,TMSB10,FLNA,CDC42EP4,DSTN,SEMA5A,PPM1F,ARHGAP6,HSPA1A,ARPC5…
GO_POSITIVE_REGULATION_OF_CELL_ADHESION	0.001838	0.02287	0.390401	1.60869	CD44,CAV1,ITGA2,CD47,LGALS1,TRIOBP,NRP1,ANXA1,FBLN2,CCL2,IL6ST,APBB1IP,CDH13,ICOSLG,ADAM9,SFRP1,DPP4,EMP2,TGFBR2,DOCK5,COL8A1,ITGA5,PYCARD,FOXF1,EMILIN1,IL1B,PLPP3,NFKBIZ,PTN,WNT5A,ITGB1BP1,NINJ1,STX4,S100A10,ITGA3,CIB1,BAD,PIEZO1,COL16A1,ILK,RELA,RIPK2,NID1,RSU1,PRKCA,CSF1,SOCS5,CD55,TNFRSF14,SDC4,ICAM1,SIRPA,IL4R,CD83,FYN,PRKCE,DUSP10,FLNA,IRAK1,NFAT5,PPM1F,RUNX1,FMN1,SMAD3,EMILIN2,MYADM,FLOT1,…
GO_POSITIVE_REGULATION_OF_INTRACELLULAR_SIGNAL_TRANSDUCTION	0.001672	0.02287	0.359488	1.60661	CD44,ECM1,CASP1,DCN,CAV1,HGF,IGFBP4,S100A4,SLC20A1,SPHK1,WLS,CAV2,EREG,GAS6,LGALS1,LPAR1,FGF5,PDGFRB,PDGFRA,COL3A1,NRP1,JUN,ENG,TIMP2,EGFR,CCL2,MDFIC,F10,CDH13,MSX1,GPNMB,IGFBP5,AXL,ADAM9,SECTM1,CAT,ARL6IP5,TRADD,CCL7,DUSP7,HIC1,BID,F2R,CSPG4,NENF,PYCARD,RHOC,IL1B,SASH1,AREG,DUSP6,S100A13,TNFRSF1A,C1QTNF1,MAP3K5,RAC2,WNT5A,MCL1,THBS1,ITGB1BP1,RRAGA,C1QTNF2,LRP1,TMEM9B,GADD45A,RHOG,CIB1,BAD,RTN4,P…
GO_RESPONSE_TO_CALCIUM_ION	0.003937	0.030665	0.448046	1.60567	CAV1,S100A16,JUN,JUNB,ANXA11,EGFR,CPNE3,CCND1,PTGES,ADAM9,FOSB,KCNMA1,WNT5A,THBS1,BAD,SDC1,DUSP1,PRKAA1,MEF2C,ANXA5,SEC31A,CPNE2,FOS,ITPR3,SYT11,CPNE1,CAMK2D,SLC25A24,PDCD6,ANXA7,SLC25A12,NEDD4,HSPA5
GO_FAT_CELL_DIFFERENTIATION	0.003731	0.030665	0.410466	1.60543	ADIRF,PSMB8,ARID5B,CCDC85B,CCND1,TGFB1I1,WWTR1,GRK5,SNAI2,CEBPB,PTGS2,SFRP1,ZFP36L2,ZADH2,TMEM120A,INSIG1,WNT5A,SAV1,PPARG,SIRT2,RGS2,METRNL,SDF4,ZBTB7A,HMGA2,LRRC8C,WNT5B,GPX1,GATA2,ZFP36,KLF4,DUSP10,CCDC71L,ZFP36L1,ERO1A,ENPP1,IL11,NR4A1,CEBPD,PPARD,TRIB3,SMAD3,DDIT3,AKT1
GO_REGULATION_OF_IMMUNE_SYSTEM_PROCESS	0.001631	0.02287	0.353342	1.60227	ECM1,APOD,NBL1,LGALS3,CAV1,CD68,CTSK,ITGA2,PSMB8,PSMB9,CD59,LPXN,EREG,MASP1,GAS6,ZEB1,IL1R1,CD47,TMEM173,LGALS1,GSN,CD99,CTSB,FAM210B,C1R,COL3A1,ANXA1,JUN,LY96,HTRA1,SLIT2,CCL2,C1S,IL6ST,IFI16,B2M,PRNP,GPNMB,AXL,CXCL8,ICOSLG,MTUS1,CEBPB,NFKBIA,SERPINE1,CTSL,FBN1,SFRP1,PSME1,COL1A2,DPP4,VEGFC,COL1A1,CCL7,BTN3A2,RFTN1,ZFP36L2,CXCL6,TGFBR2,APPL2,PYCARD,FOXF1,EMILIN1,LOXL3,IL1B,LOX,CFH,TWSG1,NFKBIZ,A…
GO_NEGATIVE_REGULATION_OF_CELL_POPULATION_PROLIFERATION	0.001742	0.02287	0.366897	1.60154	APOD,CXCL1,CAV1,IGFBP6,FOSL1,EMP3,ASPH,CAV2,LMNA,EREG,TSPO,ZEB1,NR2F2,CDKN1A,SERPINE2,CAMK2N1,SOD2,SRPX,FAM129B,JUN,TIMP2,FBLN1,CCL2,CD109,PRNP,TGFB1I1,CDH13,MSX1,SERPINF1,GPNMB,IGFBP5,CXCL8,PTGES,COMT,PTGIR,BTG1,SNAI2,CEBPB,PTGS2,SFRP1,IFT57,DLL4,TGFBR2,F2R,APPL2,FABP3,ACVRL1,IL1B,NDN,IGFBP7,TWSG1,TBX5,S100A11,PTN,CDKN2A,IRF1,WNT5A,THBS1,ITGB1BP1,DLC1,SAV1,CIB1,FAP,PPARG,SIRT2,TFAP2A,KANK2,BMP4,…
GO_RESPONSE_TO_REACTIVE_OXYGEN_SPECIES	0.00565	0.039452	0.402392	1.60035	APOD,HGF,FOSL1,SOD3,SPHK1,CAPN2,PDGFRB,PDGFRA,SOD2,ANXA1,JUN,EGFR,AXL,ADAM9,NQO1,CAT,MMP2,COL1A1,CRYAB,AREG,MAP3K5,GLRX2,MPV17,MMP3,BAD,SDC1,MAP1LC3A,LDHA,PXN,DUSP1,PLK3,PRKAA1,RELA,GPX1,SIRPA,STAT6,SIGMAR1,FYN,RHOB,KLF4,FOS
GO_NEGATIVE_REGULATION_OF_CELL_MOTILITY	0.003839	0.030665	0.399881	1.60011	STC1,APOD,NBL1,DCN,SP100,NR2F2,RRAS,COL3A1,ENG,FBLN1,SLIT2,CCL2,SERPINF1,IGFBP5,TIMP1,SERPINE1,SFRP1,SRGAP1,DLL4,ACVRL1,EMILIN1,TBX5,PTN,THBS1,ITGB1BP1,DLC1,LRP1,ADAM15,PPARG,NAV3,SPRED1,DUSP1,ILK,PTEN,MEF2C
GO_POSITIVE_REGULATION_OF_CELL_DEATH	0.001724	0.02287	0.364921	1.59938	CASP1,CAV1,PLAUR,FOSL1,CD248,CAPN2,TSPO,CTSC,GSN,LPAR1,CDKN1A,EGR1,PDGFRB,SOD2,SRPX,ANXA1,CASP4,JUN,SLIT2,CCL2,PRNP,MSX1,DAP,TIMP3,BTG1,NQO1,PTGS2,ARL6IP5,SFRP1,STK17A,TRADD,CTSZ,IFT57,KCNMA1,BID,F2R,FAS,PYCARD,NTSR1,DUSP6,TNFSF12,TNFRSF1A,PTN,CDKN2A,MAP3K5,WNT5A,MCL1,THBS1,SMPD1,DLC1,LRP1,MMP3,SAV1,GADD45A,ADAMTSL4,BAD,FAP,BNIP3L,PMAIP1,PPARG,SIRT2,TFAP2A,BMP4,NFATC4,ZMAT3,GRN,LDHA,DUSP1,COL18A1…
GO_CIRCULATORY_SYSTEM_DEVELOPMENT	0.001695	0.02287	0.355991	1.59537	ANPEP,ECM1,APOD,DCN,PRRX1,CAV1,HGF,TBX3,ARHGAP22,FOSL1,LOXL1,SP100,SPHK1,LMNA,EREG,ENPP2,PAM,NR2F2,LTBP1,CDKN1A,EGR1,ARHGAP24,PDGFRB,RRAS,PDGFRA,COL3A1,HSPB6,SOD2,NRP1,FAM129B,ANXA1,JUN,JUNB,MYLK,ENG,EGFR,SLIT2,CCL2,ELK3,COL15A1,ECE1,CDH13,MSX1,SERPINF1,GPNMB,CXCL8,BTG1,TYMP,SNAI2,ADAMTS6,RNH1,PTGS2,TBX2,SERPINE1,FBN1,MMP2,SFRP1,EPAS1,COL1A2,VEGFC,EMP2,IFT57,DLL4,COL1A1,TGFBR2,FHL2,COL8A1,ITGA5,P…
GO_POSITIVE_REGULATION_OF_CYSTEINE_TYPE_ENDOPEPTIDASE_ACTIVITY	0.003937	0.030665	0.441085	1.59375	CASP1,ASPH,GSN,CASP4,IFI16,DAP,ARL6IP5,TRADD,IFT57,BID,F2R,FAS,PYCARD,MAP3K5,DLC1,BAD,PMAIP1,PPARG,RIPK2,MYC,CRADD,HTRA2,FYN,PDCD5,PML,PPM1F,RPS27L,PERP,SMAD3,BCL10,PDCD6,APOPT1
GO_POSITIVE_REGULATION_OF_PROTEIN_KINASE_B_SIGNALING	0.003945	0.030665	0.437264	1.59327	HGF,EREG,GAS6,FGF5,PDGFRB,PDGFRA,ENG,EGFR,F10,IGFBP5,AXL,AREG,C1QTNF1,RAC2,THBS1,ITGB1BP1,RHOG,RTN4,ILK,ITGB1,FGFR1,MYDGF,MTDH,GPX1,KITLG,GDF15,FYN
GO_RESPONSE_TO_OXYGEN_CONTAINING_COMPOUND	0.00157	0.02287	0.346256	1.58915	STC1,ASS1,APOD,COL6A2,CASP1,CXCL1,DCN,CAV1,CD68,HGF,COL6A1,FOSL1,SOD3,LOXL1,ITGA2,SPHK1,CAPN2,CAV2,PID1,EREG,TSPO,PAM,GAS6,ZEB1,LGALS1,NR2F2,GSN,VIM,LPAR1,CDKN1A,FAM210B,EGR1,PDGFRB,RGS10,PDGFRA,COL3A1,SOD2,ANXA1,CASP4,JUN,LY96,JUNB,EGFR,SLIT2,CCL2,CCND1,PRNP,AKR1B1,SERPINF1,IGFBP5,AXL,CXCL8,TIMP1,PTGES,COMT,PTGIR,GNG12,ADAM9,ATP2B4,NQO1,SNAI2,CEBPB,ERCC1,TFPI,PTGS2,CAT,NFKBIA,SERPINE1,FBN1,TNC,M…
GO_POSITIVE_REGULATION_OF_DNA_BINDING_TRANSCRIPTION_FACTOR_ACTIVITY	0.005545	0.039268	0.395752	1.58369	CAV1,FOSL1,SPHK1,ARID5B,TMEM173,CAT,TRADD,DDR2,PYCARD,IL1B,PLPP3,WNT5A,SAV1,CIB1,PPARG,CARD16,CLU,AR,TRIM8,FZD1,PTEN,RELA,RIPK2,ZBTB7A,TICAM1,NFKB1,RBCK1,ARHGEF2,ICAM1,MTDH,IKBKG,TERF2IP,IRAK3,MTPN,TRIM25,RPS6KA4,TRIM38,RAB7B,IRAK1,UBC,CD40,HSPA1A,MAP3K13,TRIM22,IKBKB,MAVS,GREM1,SMAD3,DDIT3,FLOT1,RWDD1,NFKB2,AKT1,EDA2R,BCL10
GO_PROTEIN_KINASE_B_SIGNALING	0.003724	0.030665	0.402694	1.58325	HGF,EREG,GAS6,FGF5,PDGFRB,RRAS,PDGFRA,ENG,EGFR,CCL2,F10,IGFBP5,AXL,IL1B,AREG,LOX,C1QTNF1,RAC2,THBS1,ITGB1BP1,RCN3,RHOG,CIB1,RTN4,SIRT2,ILK,PLK3,PTEN,ITGB1,FGFR1,MYDGF,PHLDA3,MTDH,GPX1,KITLG,GDF15,FYN,KLF4,ZFP36L1,CPNE1,SEMA5A,CD40,PIK3CD,TRIB3,DDIT3,AKT1,FGF1,PPP2R5B,RICTOR,PDCD6
GO_EPITHELIAL_CELL_PROLIFERATION	0.001832	0.02287	0.381191	1.58091	ECM1,CAV1,HGF,IGFBP4,CAV2,EREG,NR2F2,NRP1,JUN,HTRA1,EGFR,CCL2,CD109,CCND1,CDH13,SERPINF1,IGFBP5,SNAI2,CEBPB,SFRP1,VEGFC,IFT57,DLL4,COL8A1,ACVRL1,AREG,TNFSF12,OSR2,LAMB1,PTN,WNT5A,THBS1,ITGB1BP1,C6orf89,SAV1,BAD,FAP,RTN4,PPARG,BMP4,GRN,WDR13,AR,PGF,GLUL,PTEN,MMP14,FGFR1,MEF2C,MYC,PRKCA,MYDGF,GPX1,PURA,BMPER,GATA2,STAT6,VEGFB,ZFP36,LAMC1,RB1,DUSP10,ZFP36L1,ANG,AGGF1,NR4A1,SEMA5A,ZNF580,MAGED1,STAT1…
GO_REGULATION_OF_SIGNALING_RECEPTOR_ACTIVITY	0.001862	0.02287	0.38475	1.57955	TNFRSF11B,STC1,PLAU,NBL1,CXCL1,CLEC11A,HGF,PHLDA2,EREG,GAS6,DKK3,FGF5,NRP1,CCL2,GPNMB,CXCL8,TIMP1,TYMP,SECTM1,CDC42EP2,SERPINE1,FBN1,HOMER3,VEGFC,CCL7,CXCL6,CNIH3,NENF,IL1B,AREG,TNFSF12,PTN,WNT5A,LY6E,BMP4,EFEMP1,GRN,METRNL,SNX6,GRP,PGF,PTEN,ITGB1,MEF2C,CSF1,SOCS5,CKLF,CAPN1,KITLG,GDF15,VEGFB,IL19
GO_NEGATIVE_REGULATION_OF_CELLULAR_RESPONSE_TO_GROWTH_FACTOR_STIMULUS	0.003922	0.030665	0.431677	1.57951	NBL1,DCN,CAV1,CAV2,VEPH1,LTBP1,FAM129B,HTRA1,SLIT2,CD109,TGFB1I1,FBN1,SFRP1,TGFBR2,EMILIN1,TWSG1,SMURF2,WNT5A,THBS1,GPC1,HHEX,ADAMTS12,SNX6,FZD1,VASN,ZBTB7A
GO_ADAPTIVE_IMMUNE_RESPONSE_BASED_ON_SOMATIC_RECOMBINATION_OF_IMMUNE_RECEPTORS_BUILT_FROM_IMMUNOGLOBULIN_SUPERFAMILY_DOMAINS	0.003738	0.030665	0.416971	1.57827	POU2F2,IL1R1,CTSC,C1R,ANXA1,C1S,B2M,ERCC1,EMP2,BTN3A2,RFTN1,LOXL3,IL1B,NFKBIZ,MICA,C3,RELB,HPRT1,CLU,MEF2C,RIPK2,SOCS5,CD55,ICAM1,IL4R,STAT6,CD81,RAB27A,PARP3,CD40,HRAS,TNFAIP3,NFKB2,BCL10,GNL1
GO_CELLULAR_RESPONSE_TO_OXYGEN_LEVELS	0.005576	0.039303	0.394253	1.57592	STC1,CAV1,PSMB8,PSMB9,LMNA,LPAR1,EGR1,PTGS2,SFRP1,PSME1,EPAS1,FAS,PTN,BAD,BNIP3L,PMAIP1,PSME2,PPARG,TBL2,SIRT2,NDRG1,CARD16,LIMD1,PLK3,SLC9A1,PRKAA1,ATG7,PTEN,VASN,MYC,ATP6V0D1,MGARP,ICAM1,HP1BP3,PSMF1,CACNB3,MALAT1,PRKCE,BACH1,PSMD9,NAMPT,ZFP36L1,ERO1A,IRAK1,UBC
GO_GOLGI_VESICLE_TRANSPORT	0.001767	0.02287	0.373706	1.57434	CD59,GAS6,CTSC,EHD3,OPTN,TAPBP,VAMP5,KDELR3,COPZ2,F10,STXBP6,CTSZ,WIPI1,DCTN3,CNIH3,AREG,INSIG1,BCAP29,STX4,ANKRD28,GAS1,VAMP2,CREB3L2,CAPZB,USE1,OSBPL5,COPG1,MYO1B,TMED3,LMF1,TRAPPC1,CD55,ERGIC1,ARFGAP3,SEC31A,ERGIC3,SEC24D,SNX8,SEC23A,SAR1B,SCAMP3,MCFD2,KLC1,GABARAPL2,ARFRP1,CAPZA1,COPB2,IER3IP1,KDELR2,CEP19,TMED7,ARL3,RAB7B,DCTN2,GOLGA4,TMED10,TEX261,DCTN6,CSNK1D,BLZF1,YIPF5,TRAPPC3,ERGIC2,ARL…
GO_PROTEIN_COMPLEX_OLIGOMERIZATION	0.00177	0.02287	0.368074	1.57423	MMP1,COL6A2,CAV1,COL6A1,CAV2,AHNAK,PAM,EHD3,SOD2,PRNP,CAT,COL1A2,TRADD,COL1A1,CRYAB,BID,SEPT11,APPL2,DECR1,PYCARD,PFKL,RHOC,EMILIN1,TMEM120A,GSDMD,EHD1,C1QTNF1,CHMP3,COLEC12,C1QTNF2,S100A10,ANXA2,MMP3,HPRT1,PMAIP1,SEPT9,KRT10,ILK,MARCKS,CLU,SLC9A1,AR,PRKAA1,GLUL,KCTD12,KCTD10,ANXA6,GBP1,SNX9,HM13,HTRA2,ANXA5,ANGPTL4,LRRC8C,SHKBP1,SH3GLB1,PDCD6IP,HGSNAT,ACAT1,SIGMAR1,IKBKE,SQSTM1,SRR,NBR1,MGST1,ST…
GO_ACTIVATION_OF_INNATE_IMMUNE_RESPONSE	0.003697	0.030665	0.389282	1.57408	CAV1,CTSK,PSMB8,PSMB9,TMEM173,CTSB,LY96,IFI16,NFKBIA,CTSL,PSME1,RFTN1,APPL2,PYCARD,IRF1,COLEC12,RELB,RTN4,PSME2,TNIP1,TANK,RELA,RIPK2,TICAM1,NFKB1,IKBKG,PSMF1,IRAK3,RPS6KA3,F2RL1,IKBKE,FYN,PRKCE,PSMD9,TIFA,RAB7B,IRAK1,UBC,MAPKAPK3,TRAF3,HRAS,HSPA1A,IKBKB,MAVS,TNFAIP3,FLOT1,CARD9,BCL10
REACTOME_TRANSPORT_TO_THE_GOLGI_AND_SUBSEQUENT_MODIFICATION	0.003759	0.030665	0.402753	1.57385	CD59,CTSC,KDELR3,COPZ2,CTSZ,DCTN3,CNIH3,AREG,MGAT1,ST3GAL4,ANKRD28,TUBA1A,MGAT5,CAPZB,TUBB6,COPG1,TMED3,TRAPPC1,CD55,ARFGAP3,SEC31A,SEC24D,SEC23A,SAR1B,MCFD2,TUBB4B,CAPZA1,COPB2,KDELR2,TMED7,DCTN2,TMED10,DCTN6,CSNK1D,FUT8,TRAPPC3,ANK1,B4GALT1,CNIH1,TMEM115,DYNC1I2,STX5,B4GALT2,MAN1A2,SEC13,GRIA1,COG1,ACTR1A,SEC22B,RAB1B,DYNC1H1,SEC22A,CAPZA2,NAPG,ACTR10,TMED9,ARF1,COL7A1,LMAN1,COPA,COPB1,TUBA1C,G…
KEGG_MAPK_SIGNALING_PATHWAY	0.003802	0.030665	0.39124	1.56958	IL1R1,FGF5,PDGFRB,RRAS,PDGFRA,JUN,EGFR,GNG12,DUSP7,TGFBR2,FAS,CDC25B,IL1B,DUSP6,TNFRSF1A,MAP3K5,RAC2,RELB,GADD45A,NFATC4,TAOK3,DUSP1,DUSP4,FGFR1,RELA,MEF2C,NFKB1,MYC,MAP2K3,PRKCA,IKBKG,RAP1B,CACNB3,RPS6KA3,HSPA2,FOS,DUSP10,RAP1A,RPS6KA4,CHP1,FLNA,DAXX,NR4A1,MAPKAPK3,NF1,HRAS,HSPA1A,MAP3K13,IKBKB,DDIT3,NFKB2,AKT1,MAPK3,DUSP14,NTF3,FGF1,HSPB1
GO_ORGANELLE_FUSION	0.003899	0.030665	0.434329	1.56579	CAV2,PID1,ANXA1,TAPBP,STXBP6,VAMP4,TAP1,CHMP3,STX4,ANXA2,EEA1,STX10,STX1A,SAMD9,VPS16,STX12,SAMD9L,TAP2,TMEM175,STX2,SEPT8,RAB7B,SNAP29,VAMP3,SNAPIN,STX5,RAB7A,SEC22B,RAB34,STX8,PRRT2,FIS1
GO_ENDOTHELIAL_CELL_PROLIFERATION	0.003899	0.030665	0.433416	1.56249	ECM1,CAV1,CAV2,NR2F2,NRP1,JUN,CCL2,CDH13,VEGFC,DLL4,ACVRL1,TNFSF12,WNT5A,THBS1,ITGB1BP1,PPARG,BMP4,PGF,MMP14,FGFR1,MEF2C,PRKCA,MYDGF,BMPER,GATA2,VEGFB,ANG,AGGF1,NR4A1,SEMA5A,ZNF580,STAT1,NF1
GO_REGULATION_OF_LYMPHOCYTE_ACTIVATION	0.001887	0.02287	0.382148	1.56125	LGALS3,CAV1,GAS6,ZEB1,CD47,LGALS1,GSN,ANXA1,CCL2,IL6ST,PRNP,GPNMB,AXL,ICOSLG,CEBPB,SFRP1,DPP4,ZFP36L2,TGFBR2,PYCARD,LOXL3,IL1B,TWSG1,NFKBIZ,MICA,IRF1,RAC2,BAD,BMP4,AHR,PRDM1,MMP14,MEF2C,RIPK2,TICAM1,SOCS5,PAG1,CD55,TNFRSF14,SDC4,SIRPA,IL4R,STAT6,CD83,CD81,FYN,DUSP10,MAD1L1,ZFP36L1
GO_RESPONSE_TO_ABIOTIC_STIMULUS	0.001634	0.02287	0.343727	1.55853	ADIRF,STC1,PLAU,CASP1,DCN,CAV1,FOSL1,SOD3,ITGA2,PSMB8,PSMB9,CAPN2,LMNA,TSPO,PAM,LPAR1,MME,CDKN1A,EGR1,SERPINE2,PDGFRB,PLAT,COL3A1,ANXA1,JUN,JUNB,MYLK,ENG,EGFR,IFI16,CCND1,AKR1B1,TGFB1I1,USP53,SERPINF1,ICOSLG,ATP2B4,NQO1,SNAI2,ERCC1,PTGS2,CAT,NFKBIA,TNC,MMP2,SFRP1,LXN,PSME1,EPAS1,SERPINB6,BDKRB2,DPP4,VEGFC,COL1A1,CRYAB,CCL7,FOSB,TGFBR2,IKBIP,KCNMA1,FAS,XPC,APPL2,ACVRL1,NTSR1,IL1B,PLOD1,TRPV2,IGFBP…
GO_REGULATION_OF_METAL_ION_TRANSPORT	0.003697	0.030665	0.384861	1.55621	STC1,LGALS3,CAV1,TSPO,AHNAK,GLRX,SERPINE2,EHD3,PDGFRB,MYLK,CCL2,B2M,PRNP,GEM,ATP2B4,PTGS2,HOMER3,F2R,G6PD,NTSR1,TRPV2,FXYD5,ANXA2,CD63,VAMP2,GSTO1,SLC9A1,PTEN,ICAM1,BIN1,CACNB3,FHL1,UBASH3B,FYN,HSPA2,ORAI1,PRKCE,CEMIP,CHP1,PML,GNAI2,FLNA,CAMK2D,CNKSR3,KCNIP3,OSR1,AKT1,SRI,PSEN2,BEST1,MYO5A,FKBP1A,CAMK2G,KCNN2
HALLMARK_P53_PATHWAY	0.00565	0.039452	0.391258	1.55607	CASP1,S100A4,SPHK1,CDKN1A,CD82,JUN,CDH13,PROCR,BTG1,PMM1,PPP1R15A,F2R,FAS,XPC,DRAM1,TM4SF1,TAP1,IER5,CDKN2A,NINJ1,S100A10,GADD45A,AK1,SDC1,ZMAT3,IER3,NDRG1,DDB2,PLK3,PHLDA3,STEAP3,CCND3,H2AFJ,CD81,PLXNB2,SEC61A1,RHBDF2,KLF4,RB1,FOS,ZFP36L1,FDXR,IRAK1,MAPKAPK3,RPS27L,HRAS,TRIB3,PERP,DDIT3,NUPR1,TOB1
GO_CELLULAR_RESPONSE_TO_OXYGEN_CONTAINING_COMPOUND	0.001664	0.02287	0.346775	1.55561	STC1,ASS1,CASP1,CXCL1,CAV1,CD68,HGF,COL6A1,SOD3,ITGA2,SPHK1,CAPN2,CAV2,PID1,TSPO,GAS6,ZEB1,LGALS1,VIM,LPAR1,FAM210B,EGR1,RGS10,PDGFRA,COL3A1,SOD2,ANXA1,CASP4,JUN,LY96,EGFR,SLIT2,CCL2,PRNP,AKR1B1,SERPINF1,IGFBP5,AXL,CXCL8,ADAM9,ATP2B4,NQO1,SNAI2,CEBPB,TFPI,PTGS2,NFKBIA,SERPINE1,FBN1,TNC,MMP2,SFRP1,COL1A2,COL1A1,CCL7,TWF2,CXCL6,LPIN1,APPL2,PYCARD,IL1B,SASH1,INSIG1,PTN,MAP3K5,GLRX2,WNT5A,COLEC12,RRA…
GO_RESPONSE_TO_XENOBIOTIC_STIMULUS	0.003795	0.030665	0.398189	1.5551	ASS1,PTGS1,GSTM3,EGR1,RGS10,EGFR,RGS17,SERPINF1,NQO1,CBR3,AKR7A2,FOSB,CYB5R3,SMPD1,NR3C1,CMBL,HPRT1,PPARG,RGS2,MAP1LC3A,MGST3,GSTO1,AHR,PRKAA1,ATG7,AIP,RELA,CES2,PEA15,GSS,ICAM1,GPX1,GSTM4,SRR,MGST1,PRKCE,ACAA1,RB1,AKR1C1
GO_REGULATION_OF_CELLULAR_KETONE_METABOLIC_PROCESS	0.003968	0.030665	0.429808	1.55243	CAV1,PSMB8,PSMB9,DKK3,EGR1,COMT,ATP2B4,NQO1,PSME1,APPL2,FABP3,C1QTNF2,PSME2,PPARG,ACADVL,PSMF1,STARD4,PRKCE,PSMD9,ADM,LONP2,PPARA,AKT1
GO_RESPONSE_TO_NUTRIENT	0.003731	0.030665	0.400804	1.5512	TNFRSF11B,STC1,ASS1,ITGA2,TSPO,GAS6,GSN,EGFR,CCND1,NQO1,SNAI2,ERCC1,PTGS2,CAT,TNC,SFRP1,COL1A1,TGFBR2,IL1B,PTN,PPARG,KANK2,LDHA,PTEN,RELA
GO_POSITIVE_REGULATION_OF_CYTOSKELETON_ORGANIZATION	0.003774	0.030665	0.392961	1.55086	CDC42EP3,CD47,GSN,LPAR1,NRP1,CDC42EP2,SFRP1,CFL2,CDC42EP5,PYCARD,RHOC,STMN2,ARPC1B,CDC42EP1,ITGB1BP1,GPSM2,S100A10,WIPF1,NAV3,PXN,MYO1C,NES,FHOD1,ARPC1A,SNX9,SDC4,ICAM1,BIN1,F2RL1,CYFIP1,NIN,PRKCE,SORBS3,FLNA,CDC42EP4,DSTN,SEMA5A,PPM1F,HRAS,HSPA1A,ARPC5,FMN1,SMAD3,NTF3,NCK1,ARL2,CTTN,RICTOR,SLAIN2,EVL,KATNBL1,ARF6,ABL1,ACTR3,ARPIN,PFDN2
GO_NEGATIVE_REGULATION_OF_LOCOMOTION	0.001887	0.02287	0.379362	1.54987	STC1,APOD,NBL1,DCN,SP100,NR2F2,RRAS,COL3A1,NRP1,ENG,FBLN1,SLIT2,CCL2,SERPINF1,IGFBP5,TIMP1,SERPINE1,SFRP1,SRGAP1,DLL4,ACVRL1,EMILIN1,TBX5,PTN,CHMP3,WNT5A,THBS1,ITGB1BP1,DLC1,LRP1,ADAM15,PPARG,NAV3,SPRED1,DUSP1,ILK,TRIM8,PTEN,MEF2C
GO_NEGATIVE_REGULATION_OF_SIGNALING	0.001597	0.02287	0.339702	1.54932	CD44,ECM1,APOD,NBL1,DCN,LGALS3,CAV1,HGF,MVP,PLAUR,IGFBP4,IGFBP6,APCDD1,PSMB8,PSMB9,LPXN,CAV2,VEPH1,PID1,LMNA,EREG,GAS6,SH3KBP1,DKK3,CD47,LTBP1,LPAR1,CARD19,RGS3,EGR1,SERPINE2,CAMK2N1,RGS10,OPTN,SOD2,NRP1,FAM129B,LY96,TIMP2,HTRA1,EGFR,FBLN1,SLIT2,RGS17,CD109,IFI6,PRNP,TGFB1I1,IGFBP5,CXCL8,TIMP3,PTGIR,WWTR1,ATP2B4,SNAI2,PTGS2,NFKBIA,SERPINE1,FBN1,HOMER3,SFRP1,PSME1,BDKRB2,TRADD,DLL4,DUSP7,CTHRC1,TG…
GO_NEGATIVE_REGULATION_OF_EPITHELIAL_CELL_PROLIFERATION	0.00789	0.048506	0.431738	1.54886	CAV1,CAV2,EREG,NR2F2,CCL2,CD109,SERPINF1,SNAI2,SFRP1,IFT57,DLL4,ACVRL1,PTN,WNT5A,THBS1,SAV1,PPARG,BMP4,WDR13,AR,PTEN,MEF2C
GO_NEGATIVE_REGULATION_OF_CYTOKINE_PRODUCTION	0.003731	0.030665	0.395015	1.54727	APOD,HGF,TSPO,GAS6,ANXA1,PRNP,GPNMB,AXL,HOMER3,SRGN,UBE2L6,ANXA4,APPL2,PYCARD,TWSG1,THBS1,RELB,CUEDC2,NAV3,CARD16,MAPKBP1,FGFR1,NFKB1,GBP1,PDCD4,SOCS5,PPP1R11,IRAK3,SIRPA,SSC5D,F2RL1,IKBKE,CD83,ZFP36,KLF4,TRIM25,RPS6KA4,PML,SYT11
GO_CARBOHYDRATE_DERIVATIVE_CATABOLIC_PROCESS	0.003788	0.030665	0.40497	1.54505	CD44,NT5E,DCN,LUM,CST3,TYMP,CSPG4,CTBS,BGN,MGAT1,GPC1,ADAMTS12,HPRT1,SDC1,APOBEC3C,NUDT16,SLC9A1,PRELP,SDC4,HEXB,GPD2,NT5C3A,HGSNAT,EDEM3,ACAT1,AMPD3,DPYD,IDUA,CEMIP,IDS,GNPDA2,CHP1,PDE4A,FUCA2,GALNS,NAGA,HEXA,GBA
GO_ERK1_AND_ERK2_CASCADE	0.00565	0.039452	0.388294	1.54428	CD44,GAS6,PDGFRB,CAMK2N1,RRAS,PDGFRA,NRP1,JUN,EGFR,FBLN1,CCL2,GPNMB,TIMP3,CCL7,ZFP36L2,F2R,PYCARD,EMILIN1,IL1B,DUSP6,ITGB1BP1,LRP1,CIB1,BMP4,TNIP1,SPRED1,DUSP1,DUSP4,PTEN,RIPK2,HAND2,MYC,GBP1,PRKCA,ICAM1,RAP1B,SIRPA,BMPER,NPTN,F2RL1,KLF4,DUSP10,RAP1A,ZFP36L1,NOTCH2
GO_TRANSMEMBRANE_RECEPTOR_PROTEIN_TYROSINE_KINASE_SIGNALING_PATHWAY	0.001715	0.02287	0.351694	1.54415	APOD,DCN,HGF,MVP,PLAUR,IGFBP4,IGFBP6,CAV2,PID1,ARID5B,EREG,SH3KBP1,CHN1,FGF5,PDGFRB,PLAT,PDGFRA,NRP1,FAM129B,EGFR,SH2B3,CPNE3,PDGFRL,IFI6,CDH13,IGFBP5,AXL,PTGIR,MMP2,BDKRB2,VEGFC,COL1A1,DDR2,ITGA5,EPS8,CSPG4,EMILIN1,IL1B,AREG,NDN,LOX,ARPC1B,WNT5A,THBS1,TCIRG1,TMEM204,GPC1,LRP1,CD63,MYOF,DOK1,CCBE1,RTN4,HHEX,ADAMTS12,SOCS2,SIRT2,NFATC4,FAM20C,SPRED1,EFEMP1,DNM1,PXN,SNX6,AR,MYO1C,APH1B,PGF,PRKAA1,P…
GO_RESPONSE_TO_DRUG	0.001686	0.02287	0.346146	1.54384	ADIRF,TNFRSF11B,ASS1,APOD,CAV1,HGF,FOSL1,ITGA2,SPHK1,CAPN2,MT2A,TSPO,PAM,GAS6,LGALS1,GSN,VIM,CDKN1A,EGR1,PDGFRB,RGS10,ANXA1,JUN,JUNB,ENG,TIMP2,EGFR,SLIT2,RGS17,B2M,CCND1,PRNP,MSX1,SERPINF1,AXL,COMT,NNMT,ADAM9,NQO1,PTGS2,CAT,NFKBIA,ARL6IP5,TNC,SFRP1,VEGFC,COL1A1,CRYAB,CCL7,FOSB,TGFBR2,KCNMA1,EPS8,PRAF2,XPC,SLC22A18,FABP3,G6PD,NTSR1,IL1B,AREG,DUSP6,LOX,PLIN2,IGFBP7,PTN,MAP3K5,GLRX2,THBS1,SMPD1,NR3C…
GO_ENZYME_LINKED_RECEPTOR_PROTEIN_SIGNALING_PATHWAY	0.001658	0.02287	0.344021	1.54289	APOD,NBL1,DCN,CAV1,HGF,MVP,PLAUR,IGFBP4,IGFBP6,CAV2,VEPH1,PID1,ARID5B,EREG,GAS6,SH3KBP1,ZEB1,DKK3,CHN1,VIM,LTBP1,RGMB,FGF5,EGR1,PDGFRB,PLAT,PDGFRA,COL3A1,NRP1,FAM129B,JUN,ENG,HTRA1,EGFR,SH2B3,IL6ST,CPNE3,PDGFRL,CD109,IFI6,TGFB1I1,CDH13,MSX1,IGFBP5,AXL,PTGIR,WWTR1,ADAM9,FBN1,MMP2,SFRP1,BDKRB2,COL1A2,VEGFC,LTBP4,COL1A1,DDR2,TGFBR2,ITGA5,EPS8,APPL2,ACVRL1,CSPG4,EMILIN1,IL1B,AREG,NDN,LOX,TWSG1,ARPC1B…
GO_POSITIVE_REGULATION_OF_IMMUNE_SYSTEM_PROCESS	0.001698	0.02287	0.346273	1.54003	LGALS3,CAV1,CTSK,ITGA2,PSMB8,PSMB9,CD59,LPXN,EREG,MASP1,GAS6,IL1R1,CD47,TMEM173,LGALS1,CTSB,FAM210B,C1R,ANXA1,JUN,LY96,CCL2,C1S,IL6ST,IFI16,B2M,PRNP,AXL,CXCL8,ICOSLG,NFKBIA,SERPINE1,CTSL,PSME1,DPP4,VEGFC,CCL7,BTN3A2,RFTN1,TGFBR2,APPL2,PYCARD,FOXF1,IL1B,CFH,NFKBIZ,ARPC1B,MICA,IRF1,RAC2,WNT5A,C3,COLEC12,THBS1,STX4,RELB,BAD,HMSD,RTN4,WIPF1,PSME2,TNIP1,TANK,SCARA3,CLU,MYO1C,PGF,MMP14,RELA,MEF2C,RIPK2…
GO_TAXIS	0.001783	0.02287	0.360043	1.53846	PLAU,NBL1,CXCL1,LGALS3,HGF,PLAUR,FOSL1,ITGA2,PLP2,ENPP2,GAS6,SH3KBP1,CHN1,LPAR1,ACKR4,PDGFRB,PDGFRA,NRP1,FAM129B,ANXA1,SLIT2,CCL2,CDH13,GPNMB,CXCL8,TYMP,MTUS1,SERPINE1,VEGFC,CCL7,CXCL6,IL1B,LOX,LYST,ROBO3,EXT1,MYCBP2,HSD3B7,RAC2,WNT5A,THBS1,STX4,GPC1,FEZ1,LRP1,RHOG,DOK1,FEZ2,BMP4,SBDS,DUSP1,PARVA,DPYSL2,PGF,GAP43,FGFR1,PRKCA,CSF1,PLXND1,CKLF,NPTN,F2RL1,VEGFB,CYFIP1,FYN,PLXNB2,RAB13,CH25H,CREB3,ET…
GO_ANATOMICAL_STRUCTURE_FORMATION_INVOLVED_IN_MORPHOGENESIS	0.001658	0.02287	0.34288	1.53778	ANPEP,ECM1,APOD,DCN,CAV1,HGF,COL6A1,TBX3,ARHGAP22,SP100,ITGA2,SPHK1,WLS,CAPN2,EREG,ENPP2,ARHGAP24,PDGFRB,EHD2,RRAS,PDGFRA,HSPB6,NRP1,FAM129B,ANXA1,JUN,JUNB,ENG,HTRA1,SLIT2,CCL2,ELK3,CD109,COL15A1,CDH13,MSX1,SERPINF1,GPNMB,CXCL8,BTG1,ADAM9,TYMP,SNAI2,ERCC1,RNH1,PTGS2,TBX2,SERPINE1,FJX1,MMP2,SFRP1,EPAS1,VEGFC,EMP2,IFT57,DLL4,COL1A1,CFL2,CTHRC1,TGFBR2,FHL2,COL8A1,ITGA5,ACVRL1,CSPG4,FOXF1,EMILIN1,THB…
GO_CELLULAR_RESPONSE_TO_EXTERNAL_STIMULUS	0.001832	0.02287	0.371248	1.53629	CASP1,CD68,FOSL1,ITGA2,GAS6,CDKN1A,JUN,ENG,EGFR,IFI16,AXL,DAP,COMT,SNAI2,PTGS2,TNC,SFRP1,COL1A1,WIPI1,FAS,WDR45,IL1B,GSDMD,TNFRSF1A,PTN,IRF1,MAP3K5,GLRX2,RRAGA,RALB,GADD45A,BAD,PMAIP1,PPARG,TBL2,KANK2,PIEZO1,MAP1LC3A,LAMP2,BAG3,SLC9A1,PRKAA1,GLUL,ATG7,NFKB1,RNF152,CRADD,GAS2L1,SH3GLB1,ICAM1,CACNB3,GABARAP,MTPN,FYN
GO_REGULATION_OF_ANATOMICAL_STRUCTURE_MORPHOGENESIS	0.001678	0.02287	0.342562	1.53624	TNFRSF11B,CD44,ECM1,DCN,HGF,CDC42EP3,SP100,PSMB8,SPHK1,PSMB9,CAPN2,PID1,ENPP2,SH3KBP1,CHN1,LPAR1,TRIOBP,EHD2,RRAS,HSPB6,NRP1,CST3,FAM129B,ANXA1,ENG,FBLN1,SLIT2,CCL2,MSX1,SERPINF1,GPNMB,CXCL8,CRABP2,BTG1,ADAM9,CDC42EP2,SNAI2,RNH1,PTGS2,TBX2,SERPINE1,SFRP1,PSME1,VEGFC,EMP2,DLL4,CCL7,CTHRC1,TWF2,TGFBR2,DOCK5,ARHGAP18,ITGA5,EPS8,TMBIM1,ACVRL1,CDC42EP5,SYNE3,RHOC,EMILIN1,THBS2,IL1B,SASH1,HOXA11,TNFSF1…
GO_REGULATION_OF_CELL_ACTIVATION	0.001808	0.02287	0.368733	1.53604	LGALS3,CAV1,GAS6,ZEB1,CD47,LGALS1,GSN,SERPINE2,PDGFRB,PDGFRA,ANXA1,CCL2,IL6ST,PRNP,GPNMB,AXL,ICOSLG,CEBPB,SFRP1,DPP4,ZFP36L2,TGFBR2,PYCARD,FOXF1,EMILIN1,LOXL3,IL1B,TWSG1,NFKBIZ,C1QTNF1,MICA,IRF1,RAC2,WNT5A,THBS1,STX4,BAD,BMP4,GRN,AHR,PRDM1,MMP14,MEF2C,RIPK2,TICAM1,PRKCA,SOCS5,CD9,PAG1,CD55,TNFRSF14,SDC4,SIRPA,IL4R,GATA2,STAT6,F2RL1,CD83,CD81,UBASH3B,FYN
REACTOME_TOLL_LIKE_RECEPTOR_CASCADES	0.003846	0.030665	0.410526	1.53474	CTSK,CTSB,JUN,LY96,NFKBIA,CTSL,DUSP7,DUSP6,EEA1,DNM1,TANK,DUSP4,RELA,MEF2C,RIPK2,TICAM1,NFKB1,MAP2K3,IKBKG,IRAK3,RPS6KA3,IKBKE,FOS,IRAK1,UBC,SIGIRR,MAPKAPK3,TRAF3,IKBKB,NFKB2,MAPK3
GO_REGULATION_OF_APOPTOTIC_SIGNALING_PATHWAY	0.001767	0.02287	0.364174	1.53418	CD44,LGALS3,CAV1,HGF,PLAUR,SP100,LMNA,CTSC,GSN,SOD2,NRP1,SRPX,IFI6,MSX1,TIMP3,SNAI2,PTGS2,SERPINE1,SFRP1,BDKRB2,TRADD,BID,TMBIM1,FAS,PYCARD,GRINA,IL1B,TNFSF12,MCL1,THBS1,STX4,TMEM14A,BAD,PMAIP1,BMP4,NFATC4,CLU,AR,PTEN,TNFRSF12A,FGFR1,RELA,G0S2,RBCK1,CRADD,HTRA2,PEA15,ARHGEF2,ICAM1,GPX1,IL19,FYN,PDCD5,CREB3,PML,CDKN2D,GNAI2,SERINC3,HERPUD1,MAGED1,NF1,TFDP1,GDNF,HSPA1A,CREB3L1,SMAD3,DDIT3,TNFAIP3,A…
GO_REGULATION_OF_ACTIN_FILAMENT_BASED_PROCESS	0.001786	0.02287	0.367477	1.53322	STC1,CAV1,CDC42EP3,PAM,CD47,GSN,LPAR1,TRIOBP,PDGFRB,PDGFRA,NRP1,CIT,SLIT2,CDC42EP2,SFRP1,CFL2,TWF2,ARHGAP18,EPS8,CDC42EP5,PYCARD,RHOC,GPM6B,LIMA1,ARPC1B,CDC42EP1,ITGB1BP1,DLC1,LRP1,S100A10,TMOD3,RND3,RHOG,ARHGDIA,WIPF1,CAPG,RHOBTB3,TWF1,PXN,ILK,SLC9A1,MYO1C,MEF2C,CAPZB,FHOD1,ARPC1A,FRMD6,SNX9,SDC4,ICAM1,BIN1,F2RL1,CYFIP1,MTPN,RHOB,PRKCE,SORBS3,CAPZA1,TMSB10,FLNA,CDC42EP4,DSTN,SEMA5A,PPM1F,CAMK2D,…
GO_NEGATIVE_REGULATION_OF_ESTABLISHMENT_OF_PROTEIN_LOCALIZATION	0.003861	0.030665	0.413323	1.53166	APOD,SP100,GAS6,ANXA1,MDFIC,SFRP1,SRGN,F2R,ANXA4,PFKL,IL1B,PKIG,INSIG1,ITGB1BP1,CARD16,BAG3,MAPKBP1,GBP1,ANXA5,PPP1R11,SSC5D,F2RL1,NDUFAF2,OS9,RHBDF2,PSMD9,RAB11FIP5,CHP1,PML,RHBDF1,SYT11,JAGN1,PPM1F,NF1,PKIA,TNFAIP3
GO_REGULATION_OF_OSSIFICATION	0.003745	0.030665	0.403808	1.52904	TWIST2,ECM1,HGF,TMEM119,IL6ST,IGFBP5,SNAI2,CEBPB,SFRP1,SRGN,DDR2,CTHRC1,AREG,OSR2,TWSG1,GPM6B,WNT5A,TFAP2A,BMP4,FAM20C,LIMD1,ILK,CLIC1,MEF2C,HAND2,ZHX3,CSF1
GO_POSITIVE_REGULATION_OF_PROTEIN_LOCALIZATION_TO_MEMBRANE	0.007828	0.048257	0.428955	1.52879	LGALS3,EGFR,PRNP,BID,PTN,ITGB1BP1,STX4,LRP1,ITGA3,RHOG,CIB1,BAD,PMAIP1,MYO1C,ITGB1,TCAF1,CACNB3,FYN,SQSTM1,CNPY4,PDCD5,PRKCE,CEMIP,CHP1,TFDP1,HRAS,AKT1,SSH1,CLIP3,RER1
GO_REGULATION_OF_IMMUNE_RESPONSE	0.001724	0.02287	0.345284	1.5266	ECM1,LGALS3,CAV1,CTSK,PSMB8,PSMB9,CD59,LPXN,EREG,MASP1,IL1R1,CD47,TMEM173,CD99,CTSB,C1R,COL3A1,ANXA1,JUN,LY96,C1S,IL6ST,IFI16,B2M,PRNP,ICOSLG,NFKBIA,CTSL,PSME1,COL1A2,COL1A1,BTN3A2,RFTN1,APPL2,PYCARD,FOXF1,LOXL3,IL1B,CFH,NFKBIZ,ARPC1B,MICA,IRF1,RAC2,WNT5A,C3,COLEC12,STX4,RELB,NPDC1,CUEDC2,HMSD,RTN4,IFNGR2,WIPF1,PSME2,PPARG,TNIP1,GRN,TANK,SCARA3,CLU,MYO1C,JAK1,ITGB1,RELA,MEF2C,RIPK2,TICAM1,NFKB1,A…
GO_POSITIVE_REGULATION_OF_IMMUNE_RESPONSE	0.001748	0.02287	0.350985	1.52621	LGALS3,CAV1,CTSK,PSMB8,PSMB9,CD59,LPXN,EREG,MASP1,IL1R1,CD47,TMEM173,CTSB,C1R,ANXA1,LY96,C1S,IL6ST,IFI16,B2M,PRNP,ICOSLG,NFKBIA,CTSL,PSME1,BTN3A2,RFTN1,APPL2,PYCARD,IL1B,CFH,NFKBIZ,ARPC1B,MICA,IRF1,WNT5A,C3,COLEC12,STX4,RELB,HMSD,RTN4,WIPF1,PSME2,TNIP1,TANK,SCARA3,CLU,MYO1C,RELA,MEF2C,RIPK2,TICAM1,NFKB1,ARPC1A,GBP1,RBCK1,SOCS5,PAG1,CD55,TNFRSF14,THEMIS2,IKBKG,PSMF1,IRAK3,IL4R,GATA2,CACNB3,STAT6,R…
GO_AMEBOIDAL_TYPE_CELL_MIGRATION	0.001792	0.02287	0.362661	1.52526	STC1,DCN,PRSS3,SP100,ITGA2,ARID5B,ENPP2,NR2F2,NRP1,ANXA1,JUN,SLIT2,CDH13,SERPINF1,TIMP1,ADAM9,PTGS2,DPP4,VEGFC,EMP2,DLL4,DDR2,TGFBR2,DOCK5,APPL2,ACVRL1,PLPP3,SASH1,TNFSF12,SMURF2,WNT5A,THBS1,ITGB1BP1,ITGA3,CIB1,FAP,RTN4,PPARG,KANK2,BMP4,SPRED1,GRN,PXN,ILK,ZEB2,GLUL,PTEN,ITGB1,FGFR1,MEF2C,HAND2,ANXA6,MAP2K3,PRKCA,S100A2,PLXND1,SDC4,GPX1,AMOTL1,KITLG,BMPER,GATA2,RHOB,RAB13,PRKCE,KLF4,DUSP10,PML,SRP…
GO_SKELETAL_MUSCLE_ORGAN_DEVELOPMENT	0.003922	0.030665	0.418015	1.52413	ASS1,DCN,CAV1,CAV2,NR2F2,EGR1,FAM129B,MAFF,VAMP5,CFL2,POPDC3,GPC1,HIVEP3,PRKAA1,MEF2C,SHOX2,GPX1,PITX1,STRA6,SVIL,RB1,FOS,HMG20B,BIN3,NF1,NUPR1,FLOT1
GO_RESPONSE_TO_OXIDATIVE_STRESS	0.001764	0.02287	0.358604	1.52112	APOD,PTGS1,HGF,FOSL1,SOD3,SPHK1,CAPN2,PDGFRB,PDGFRA,SOD2,ANXA1,JUN,EGFR,PRNP,AXL,ADAM9,NQO1,ERCC1,PTGS2,CAT,ARL6IP5,MMP2,EPAS1,MSRA,MSRB3,COL1A1,CRYAB,G6PD,AREG,MAP3K5,GLRX2,MCL1,MPV17,STX4,MMP3,BAD,SIRT2,SDC1,MAP1LC3A,LDHA,PXN,SCARA3,DUSP1,PLK3,FZD1,PRKAA1,ATG7,MMP14,RELA,HTRA2,H2AFY,ACOX2,NCOA7,GSS,XPA,GPX1,SIRPA,PLA2R1,STAT6,SIGMAR1,FYN,MSRB2,RHOB,MGST1,KLF4,ALDH3B1,STX2,FOS,ERO1A,PML,MGMT,NET…
GO_RESPONSE_TO_ENDOPLASMIC_RETICULUM_STRESS	0.001845	0.02287	0.369477	1.51953	CAV1,LMNA,SRPX,CASP4,JUN,KDELR3,CCL2,CCND1,CXCL8,CEBPB,UBXN6,WIPI1,PPP1R15A,GRINA,FAM129A,CHAC1,MAP3K5,THBS1,RCN3,PMAIP1,TBL2,ACADVL,CLU,SRPRA,CREB3L2,HM13,ATP6V0D1,TLN1,MYDGF,SEC31A,EDEM3,TPP1,OS9,AUP1,CREB3,TRIM25,SRPRB,YIF1A,ERO1A,PML,SERINC3,SDF2,MBTPS1,HERPUD1,ATF6B,HSPA1A,CREB3L1,TRIB3,SHC1,DDIT3,CTDSP2,FLOT1,NCK1,NFE2L2,P4HB,PPP2R5B,HSPA5,EDEM2,SEL1L,TOR1A,CDK5RAP3,CUL7,TNFRSF10B,ERLIN1,ST…
GO_POSITIVE_REGULATION_OF_CYTOKINE_PRODUCTION	0.001845	0.02287	0.369343	1.51877	CASP1,HGF,LUM,EREG,IL1R1,TMEM173,EGR1,ANXA1,LY96,IL6ST,IFI16,B2M,CEBPB,PTGS2,SERPINE1,POLR3GL,F2R,PYCARD,IL1B,GSDMD,IRF1,WNT5A,C3,THBS1,LRP1,CCBE1,AGPAT2,NFATC4,CLU,RELA,RIPK2,TICAM1,NFKB1,TRIM16,ARHGEF2,TNFRSF14,ZBTB20,IL4R,STAT6,F2RL1,CD83,POLR3H,RAB7B,IRAK1,IL17RC,ZNF580,CD40,STAT1,PANX1,HRAS,RUNX1,HSPA1A,ATP6AP2,MAVS,SMAD3,DDIT3,FLOT1,NFKB2,CARD9,MAPK3,BCL10,HSPB1,HEG1,BIRC2,TMF1,GAPDH,POLR1C…
GO_ORGAN_GROWTH	0.003752	0.030665	0.400761	1.51752	STC1,ECM1,COL6A2,COL6A1,COL6A3,PDGFRB,TBX2,DDR2,TGFBR2,G6PD,DUSP6,TBX5,ANXA2,SAV1,RGS2,SCARA3,AR,RARG,PTEN,FGFR1,MEF2C,BNC2,ANXA6,MEIS1
GO_REGULATION_OF_CELL_POPULATION_PROLIFERATION	0.001577	0.02287	0.330682	1.51677	PLAU,ECM1,APOD,CXCL1,PRRX1,LGALS3,CAV1,S100A6,CLEC11A,PTGS1,TBX3,PHLDA2,IGFBP6,FOSL1,ITGA2,EMP3,SPHK1,CD248,ASPH,CAV2,TRNP1,PID1,LMNA,EREG,TSPO,GAS6,ZEB1,CD47,NR2F2,CDKN1A,FGF5,EGR1,SERPINE2,PDGFRB,CAMK2N1,PDGFRA,TMEM119,SOD2,NRP1,SRPX,FAM129B,ANXA1,JUN,TIMP2,HTRA1,EGFR,FBLN1,CCL2,IL6ST,CD109,CCND1,PRNP,AKR1B1,TGFB1I1,CDH13,MSX1,SERPINF1,GPNMB,IGFBP5,CXCL8,ICOSLG,TIMP1,PTGES,COMT,PTGIR,WWTR1,BTG1…
GO_REGENERATION	0.003802	0.030665	0.399689	1.51375	APOD,PRRX1,HGF,TSPO,GAS6,GSN,CDKN1A,ANXA1,JUN,EGFR,CCND1,AXL,NNMT,CEBPB,TNC,TGFBR2,CPQ,LPIN1,NINJ1,LRP1,ADAM15,PPARG,GRN,PGF,PTEN,GAP43
GO_SKELETAL_SYSTEM_MORPHOGENESIS	0.005545	0.039268	0.385125	1.51221	STC1,COL6A2,PRRX1,COL6A1,COL6A3,ARID5B,ZEB1,PDGFRA,MSX1,COL13A1,MMP2,SFRP1,COL1A1,TGFBR2,HOXA11,INSIG1,OSR2,ANXA2,TFAP2A,BMP4,THRA,SCARA3,RARG,MMP14,FGFR1,MEF2C,ANXA6,NAB2,SHOX2
GO_CYTOKINE_SECRETION	0.005906	0.039844	0.41754	1.51176	CASP1,GAS6,ANXA1,SRGN,BTN3A2,F2R,ANXA4,PYCARD,IL1B,GSDMD,S100A13,WNT5A,LRP1,CARD16,MAPKBP1,RIPK2,GBP1,TRIM16,TNFRSF14,PPP1R11,IL4R,SSC5D,F2RL1,PML,SYT11,IL17RC,PANX1,MAVS,TNFAIP3,MAPK3,GAPDH,ZC3H12A,BTN3A1,ABL1
GO_POSITIVE_REGULATION_OF_SUPRAMOLECULAR_FIBER_ORGANIZATION	0.005566	0.039291	0.386555	1.51031	CDC42EP3,CD47,GSN,LPAR1,NRP1,CDC42EP2,SFRP1,CFL2,CDC42EP5,PYCARD,RHOC,STMN2,ARPC1B,CDC42EP1,ITGB1BP1,S100A10,WIPF1,NAV3,PXN,CLU,MYO1C,FHOD1,ARPC1A,SNX9,SDC4,ICAM1,BIN1,GPX1,F2RL1,CYFIP1,NIN,PRKCE,RB1,SORBS3,FLNA,CDC42EP4,DSTN,SEMA5A,PPM1F,HSPA1A,ARPC5,FMN1,SMAD3,NCK1,ARL2,CTTN,RICTOR,SLAIN2,EVL,ARF6,ABL1,ACTR3
GO_CELLULAR_KETONE_METABOLIC_PROCESS	0.007519	0.047651	0.394785	1.50958	CAV1,PSMB8,PSMB9,DKK3,EGR1,AKR1B1,COMT,ATP2B4,NQO1,PSME1,AKR7A2,APPL2,FABP3,C1QTNF2,PSME2,PPARG,ACADVL,GPD2,PSMF1,STARD4,PRKCE,PSMD9,AKR1C1,FDXR,ADM,LONP2,PPARA
GO_RESPONSE_TO_GROWTH_FACTOR	0.001689	0.02287	0.342161	1.50626	CD44,NBL1,DCN,CAV1,HGF,LUM,CAV2,VEPH1,GAS6,ZEB1,DKK3,LTBP1,RGMB,FGF5,EGR1,PDGFRB,PDGFRA,COL3A1,NRP1,FAM129B,ANXA1,JUN,ENG,HTRA1,EGFR,SLIT2,CCL2,CPNE3,CD109,TGFB1I1,MSX1,CXCL8,ADAM9,SNAI2,CAT,FBN1,TNC,SFRP1,COL1A2,VEGFC,LTBP4,DLL4,COL1A1,TWF2,ZFP36L2,TGFBR2,ITGA5,APPL2,ACVRL1,EMILIN1,IL1B,STMN2,DUSP6,NDN,LOX,TWSG1,EHD1,DAB2,SMURF2,PTN,WNT5A,THBS1,ITGB1BP1,TMEM204,GPC1,NR3C1,CD63,ITGA3,MYOF,CIB1,CC…
GO_ACTIN_FILAMENT_POLYMERIZATION	0.005693	0.039537	0.395165	1.50557	CDC42EP3,GSN,TRIOBP,SLIT2,CDC42EP2,TWF2,ARHGAP18,EPS8,CDC42EP5,PYCARD,ARPC1B,CDC42EP1,TMOD3,WIPF1,CAPG,TWF1,MYO1C,CAPZB,ARPC1A,SNX9,ICAM1,BIN1,CYFIP1,MTPN,MSRB2,PRKCE,MICALL2,CAPZA1,TMSB10,CDC42EP4,ANG,ARHGAP6,ARPC5,FMN1,MYADM,NCK1,CTTN,RICTOR,EVL,WASF3,ARF6,ACTR3,ARPIN,FHOD3
GO_NEGATIVE_REGULATION_OF_MULTICELLULAR_ORGANISMAL_PROCESS	0.001672	0.02287	0.335005	1.50376	TWIST2,TNFRSF11B,STC1,PLAU,ECM1,APOD,DCN,HGF,PLAUR,CTSK,SP100,LMNA,TSPO,GAS6,LGALS1,NR2F2,VIM,LPAR1,SERPINE2,PLAT,PDGFRA,COL3A1,NRP1,CST3,FAM129B,ANXA1,EGFR,SLIT2,B2M,PRNP,SERPINF1,GPNMB,PROCR,IGFBP5,AXL,TIMP1,COMT,ATP2B4,SNAI2,TFPI,PTGS2,TBX2,NFKBIA,SERPINE1,FBN1,HOMER3,SFRP1,CTSZ,DLL4,SRGN,TGFBR2,LAMA4,DOCK5,KCNMA1,F2R,UBE2L6,ANXA4,APPL2,ACVRL1,PYCARD,G6PD,EMILIN1,LOXL3,THBS2,IL1B,STMN2,AREG,TW…
GO_REGULATION_OF_HYDROLASE_ACTIVITY	0.001639	0.02287	0.331876	1.50328	CD44,ECM1,PTX3,CASP1,LGALS3,CAV1,HGF,ARHGAP22,PLAUR,ITGA2,COL6A3,PSMB8,PSMB9,RIN1,ASPH,CAV2,GAS6,CAST,CHN1,GSN,LPAR1,RGS3,SERPINE2,ARHGAP24,PDGFRB,RGS10,PDGFRA,NRP1,CST3,ANXA1,CASP4,JUN,TIMP2,EGFR,FBLN1,SLIT2,CCL2,IFI16,RGS17,CD109,IFI6,SERPINF1,SERPINB8,DAP,TIMP3,TIMP1,CDC42EP2,TFPI,PTGS2,PPP2R3A,SERPINE1,PXK,ARL6IP5,SFRP1,SPOCD1,LXN,SRGAP1,PSME1,SERPINB6,PCOLCE,TRADD,IFT57,CRYAB,CCL7,ARHGAP18,P…
GO_REGULATION_OF_VESICLE_MEDIATED_TRANSPORT	0.001748	0.02287	0.353752	1.50323	PTX3,LGALS3,CAV1,ITGA2,GAS6,CD47,EHD2,NRP1,ANXA1,CCL2,B2M,CDH13,AXL,SGIP1,SERPINE1,STXBP6,APPL2,VAMP4,PYCARD,FOXF1,IL1B,INSIG1,EHD1,DAB2,CHMP3,RAC2,WNT5A,C3,CD151,STX4,RALB,LRP1,ANXA2,CD63,VPS28,GAS1,PPARG,SDC1,DNM1,STX1A,VAMP2,MSN,CLU,PRKAA1,PTEN,SNX17,SEPT1,SDC4,BIN1,VPS16,PDCD6IP,RAP1B,SIRPA,IL4R,GATA2,F2RL1,SAR1B,NR1H2,RAP1A,RAB27A,GNAI2,SYT11,SEPT8,APBA2,YIPF5,GREM1,MICAL1,FLOT1,MAPK3,AP2S1,…
REACTOME_DISEASES_OF_GLYCOSYLATION	0.003922	0.030665	0.4122	1.50293	DCN,LUM,ADAMTS6,THSD4,CSPG4,THBS2,EXT1,BGN,THBS1,CTSA,GPC1,ADAMTSL4,ADAMTS12,SDC1,DPM3,POMGNT1,PRELP,ADAMTS2,C1GALT1C1,B3GAT3,SDC4,HEXB,GALK1,ALG9,NOTCH2,ALG3,SEMA5A,HEXA,B4GALT1,ST3GAL3,SPON2,B4GAT1,ALG14,PAPSS2,EXT2
GO_POSITIVE_REGULATION_OF_EPITHELIAL_CELL_MIGRATION	0.00578	0.039751	0.402149	1.50174	ITGA2,ENPP2,NRP1,ANXA1,JUN,ADAM9,PTGS2,VEGFC,TGFBR2,DOCK5,PLPP3,SASH1,WNT5A,THBS1,ITGB1BP1,ITGA3,CIB1,RTN4,BMP4,GRN,FGFR1,MAP2K3,PRKCA,AMOTL1,GATA2,RHOB,PRKCE,SRPX2,SEMA5A,ZNF580,PPM1F,CD40,AKT1,FGF1,HSPB1,NFE2L2,PDCD6,ZC3H12A,ARF6,ABL1,ADGRA2,MAP4K4,FOXC2,VEGFA,DOCK1,CALR,MET,SPARC,GLIPR2,RHOJ
GO_ACTIVATION_OF_MAPK_ACTIVITY	0.005917	0.039844	0.414698	1.50099	HGF,LPAR1,MDFIC,DUSP7,CSPG4,IL1B,DUSP6,MAP3K5,WNT5A,THBS1,C1QTNF2,S1PR2,PRKAA1,DBNL,RIPK2,MAP2K3,PEA15,IKBKG,GDF15,CD81,DAXX,IRAK1,UBC,MAPKAPK3,MAP3K13,SHC1,MAPK3,NTF3,FGF1,MLKL
GO_NEGATIVE_REGULATION_OF_APOPTOTIC_SIGNALING_PATHWAY	0.005607	0.0394	0.376026	1.49987	CD44,LGALS3,HGF,PLAUR,LMNA,SOD2,NRP1,IFI6,SNAI2,PTGS2,SERPINE1,BDKRB2,TRADD,BID,TMBIM1,FAS,GRINA,IL1B,MCL1,THBS1,TMEM14A,BMP4,CLU,AR,RELA,HTRA2,PEA15,ARHGEF2,ICAM1,GPX1,IL19,FYN,CREB3,CDKN2D,GNAI2,HERPUD1,GDNF,HSPA1A,CREB3L1,TNFAIP3,AKT1,TPT1,ACVR1,HSPB1,NFE2L2,CTTN,MDM2
GO_POSITIVE_REGULATION_OF_EPITHELIAL_CELL_PROLIFERATION	0.003738	0.030665	0.396196	1.49964	ECM1,CAV2,NRP1,JUN,HTRA1,EGFR,CCND1,CDH13,SFRP1,VEGFC,ACVRL1,TNFSF12,OSR2,LAMB1,PTN,WNT5A,BAD,RTN4,BMP4,GRN,AR,PGF,GLUL,FGFR1,MYC,PRKCA,MYDGF,GATA2,VEGFB,LAMC1,ANG,AGGF1,NR4A1,SEMA5A,ZNF580,NF1,HRAS,B4GALT1,TNFAIP3,OSR1,AKT1,FGF1,RICTOR,PDCD6
GO_NIK_NF_KAPPAB_SIGNALING	0.003752	0.030665	0.396873	1.49941	PSMB8,SPHK1,PSMB9,EGFR,UACA,NFKBIA,PSME1,TRADD,IL1B,SASH1,RELB,PSME2,ZFP91,ILK,RELA,RBCK1,PDCD4,TERF2IP,LITAF,PSMF1,IKBKE,PSMD9,IRAK1,NFAT5,CPNE1,AKIP1,GREM1,NFKB2,AKT1,BIRC2,TRIP6,ZC3H12A
GO_REGULATION_OF_TRANSMEMBRANE_RECEPTOR_PROTEIN_SERINE_THREONINE_KINASE_SIGNALING_PATHWAY	0.005566	0.039291	0.382667	1.49922	NBL1,CAV1,CAV2,VEPH1,ZEB1,DKK3,LTBP1,ENG,HTRA1,CD109,TGFB1I1,MSX1,WWTR1,FBN1,SFRP1,LTBP4,TGFBR2,ACVRL1,EMILIN1,LOX,TWSG1,DAB2,SMURF2,WNT5A,THBS1,ITGA3,BMP4,ILK,SNX6,FZD1,VASN,FST,ZBTB7A
GO_REGULATION_OF_CELL_CELL_ADHESION	0.005587	0.039315	0.366422	1.4973	CD44,ASS1,LGALS3,CAV1,CD47,LGALS1,SERPINE2,ANXA1,CCL2,IL6ST,PRNP,GPNMB,ICOSLG,SNAI2,CEBPB,DPP4,TGFBR2,PYCARD,LOXL3,IL1B,PLPP3,TWSG1,NFKBIZ,C1QTNF1,IRF1,WNT5A,FXYD5,BAD,BMP4,PIEZO1,RELA,RIPK2,PRKCA,SOCS5,CD9,PAG1,CD55,TNFRSF14,SDC4,ICAM1,SIRPA,IL4R,CD83,UBASH3B,FYN,KLF4,DUSP10,MAD1L1
GO_POSITIVE_REGULATION_OF_SIGNALING	0.001577	0.02287	0.324466	1.49727	CD44,ECM1,CASP1,DCN,PRRX1,CAV1,HGF,PLAUR,IGFBP4,S100A4,ITGA2,SLC20A1,PSMB8,SPHK1,PSMB9,WLS,CAV2,EREG,GAS6,IL1R1,CTSC,LGALS1,CHN1,GSN,LPAR1,MME,TSPAN5,FGF5,SERPINE2,PDGFRB,PDGFRA,COL3A1,NRP1,SRPX,CASP4,JUN,LY96,ENG,TIMP2,EGFR,CCL2,SH2B3,MDFIC,IL6ST,ECE1,PRNP,AKR1B1,F10,TGFB1I1,CDH13,MSX1,GPNMB,IGFBP5,AXL,TIMP3,ADAM9,SECTM1,PTGS2,CAT,ARL6IP5,SFRP1,PSME1,TSPAN14,TRADD,EMP2,DLL4,COL1A1,CCL7,DUSP7,HIC…
GO_LYMPHOCYTE_ACTIVATION	0.001779	0.02287	0.350047	1.4969	POU2F2,CD44,LGALS3,CAV1,GAS6,ZEB1,CD47,LGALS1,GSN,EGR1,ANXA1,CCL2,IL6ST,APBB1IP,B2M,PRNP,GPNMB,AXL,ICOSLG,CEBPB,ERCC1,SFRP1,DPP4,DLL4,ZFP36L2,TGFBR2,PYCARD,LOXL3,IL1B,TWSG1,NFKBIZ,IMPDH1,MICA,IRF1,RAC2,CD151,RELB,BAD,HHEX,HPRT1,BMP4,MSN,AHR,PRDM1,MMP14,ITGB1,MEF2C,RIPK2,ZBTB7A,TICAM1,SOCS5,PAG1,CD55,TNFRSF14,SDC4,ICAM1,PURA,KLF6,DOCK10,SIRPA,CCND3,IL4R,STAT6,F2RL1,CD83,SKAP2,CD81,FYN,DUSP10,MAD1L…
GO_DEFENSE_RESPONSE_TO_OTHER_ORGANISM	0.003738	0.030665	0.364716	1.49422	TMEM173,OPTN,HTRA1,IFI16,IFI6,CEBPB,SERPINE1,CXCL6,GBP3,IL10RB,PYCARD,IL1B,C19orf66,GSDMD,LYST,IFITM2,TNFRSF1A,ISG20,MICA,IRF1,CALCOCO2,BNIP3L,PMAIP1,SIRT2,APOBEC3C,GRN,MAPKBP1,ATG7,RELA,RIPK2,TICAM1,IRF2,GBP1,TNFRSF14,PPP1R11,NT5C3A,IL4R,SSC5D,F2RL1,TRIM56,IFIT5,POLR3H,TRIM25,OAS3,FAM111A,PML,SLFN11,TRIM38,FLNA,SERINC3,SYT11,JAGN1,IL17RC,FAM3A,CD40,STAT1,TRAF3,COTL1,HRAS,TRIM22,TRAF3IP2,MAVS,SHC…
GO_ENDOCYTOSIS	0.001792	0.02287	0.349136	1.4927	LGALS3,CAV1,ITGA2,RIN1,LOXL4,CAV2,ENPP2,MASP1,SH3KBP1,GSN,ACKR4,EHD2,B2M,CDH13,AXL,CXCL8,SGIP1,SERPINE1,TGFBR2,LRP10,APPL2,VAMP4,PYCARD,LOXL3,EHD1,DAB2,WNT5A,C3,COLEC12,CD151,THBS1,SCARB2,AP1S1,LRP1,ANXA2,CD63,RIN2,VPS28,WIPF1,PPARG,EEA1,LGALS3BP,DNM1,CLTB,SCARA3,CLU,DPYSL2,DBNL,ITGB1,PI4KB,SNX17,SNX9,RIN3,CD9,BIN1,GATA2,PLA2R1,DENND1A,SSC5D,NECAP2,F2RL1,CD81,NR1H2,ENPP1,RAB22A,MARCH3,SYT11,CD163…
GO_DIVALENT_INORGANIC_CATION_TRANSPORT	0.001862	0.02287	0.36358	1.49263	STC1,LGALS3,CAV1,TSPO,AHNAK,GAS6,EHD3,PDGFRB,TPCN1,MYLK,CCL2,PRNP,GEM,ATP2B4,PTGS2,HOMER3,SLC39A13,F2R,G6PD,NTSR1,TRPV2,SLC39A6,ANXA2,GSTO1,SLC9A1,ANXA6,RASA3,ORAI3,ANXA5,ICAM1,BIN1,CACNB3,UBASH3B,FYN,HSPA2,ORAI1,PRKCE,CEMIP,SEC61A1,ERO1A,PML,ATP2C1,GNAI2,TUSC3,ITPR3,ORAI2,CAMK2D,PANX1,MICU3,DDIT3,SRI,TPT1,PSEN2,BEST1,MYO5A,FKBP1A,CAMK2G
GO_REGULATION_OF_CHEMOTAXIS	0.00759	0.047839	0.391286	1.49079	NBL1,ITGA2,GAS6,LPAR1,PDGFRB,PDGFRA,NRP1,SLIT2,CCL2,CDH13,CXCL8,MTUS1,SERPINE1,VEGFC,CCL7,MYCBP2,RAC2,WNT5A,THBS1,STX4,DUSP1,PGF,FGFR1,CSF1,F2RL1,VEGFB,CREB3,MPP1,SEMA5A,ZNF580,PPM1F,GREM1,SMAD3,MAPK3,NTF3,FGF1,HSPB1
GO_ANIMAL_ORGAN_MORPHOGENESIS	0.001656	0.02287	0.331202	1.48172	TNFRSF11B,STC1,COL6A2,DCN,PRRX1,CAV1,HGF,COL6A1,TBX3,PHLDA2,ITGA2,COL6A3,PSMB8,PSMB9,ARID5B,EREG,PAM,NFIC,ZEB1,TRIOBP,PDGFRB,PDGFRA,COL3A1,NRP1,JUN,MYLK,ENG,HTRA1,EGFR,SLIT2,CCL2,MSX1,IGFBP5,COL13A1,WWTR1,GAMT,SNAI2,CEBPB,TBX2,SERPINE1,FBN1,FJX1,TNC,MMP2,SFRP1,PSME1,COL1A2,VEGFC,CTSZ,IFT57,DLL4,COL1A1,CTHRC1,TGFBR2,FHL2,COL8A1,TSHZ1,ACVRL1,FOXF1,AREG,HOXA11,FAM20A,INSIG1,OSR2,PLOD3,LAMB1,TWSG1,TB…
GO_APOPTOTIC_SIGNALING_PATHWAY	0.001757	0.02287	0.339975	1.48086	CD44,CASP1,LGALS3,CAV1,HGF,PLAUR,SP100,LMNA,CTSC,GSN,CDKN1A,SOD2,NRP1,SRPX,CASP4,JUN,LY96,IFI16,UACA,IFI6,MSX1,DAP,TIMP3,SNAI2,CEBPB,PTGS2,SERPINE1,ARL6IP5,SFRP1,BDKRB2,TRADD,SRGN,HIC1,PPP1R15A,BID,TMBIM1,FAS,PYCARD,GRINA,IL1B,TNFSF12,CHAC1,TNFRSF1A,MAP3K5,MCL1,THBS1,STX4,TMEM14A,CIB1,BAD,BNIP3L,PMAIP1,BMP4,NFATC4,CLU,BAG3,AR,PTEN,TNFRSF12A,FGFR1,RELA,TICAM1,G0S2,ANXA6,TMEM109,PRKCA,RBCK1,CRADD,H…
GO_ERBB_SIGNALING_PATHWAY	0.005917	0.039844	0.404677	1.47453	MVP,PLAUR,EREG,SH3KBP1,EGFR,CPNE3,IFI6,CDH13,EPS8,AREG,DOK1,RTN4,EFEMP1,SNX6,PRKCA,SOCS5,SHKBP1,MVB12A,RHBDF2,CAMLG
GO_OSTEOBLAST_DIFFERENTIATION	0.007463	0.047428	0.376925	1.47424	TWIST2,HGF,COL6A1,TMEM119,JUNB,IL6ST,GPNMB,IGFBP5,WWTR1,SNAI2,CEBPB,CAT,TNC,SFRP1,COL1A1,DDR2,CTHRC1,FHL2,AREG,LOX,BCAP29,TWSG1,BMP4,FAM20C,LIMD1,ILK,FZD1,CLIC1,MEF2C,HAND2,ZHX3,SHOX2
GO_RESPIRATORY_SYSTEM_DEVELOPMENT	0.007491	0.047539	0.383659	1.47312	ASS1,MME,PDGFRB,PDGFRA,EGFR,IGFBP5,TNC,EPAS1,CTSZ,TGFBR2,FOXF1,LOXL3,LOX,PLOD3,TBX5,PTN,WNT5A,RCN3,ITGA3,SAV1,BMP4,LIPA,THRA,RARG,MMP14,TNS3,FGFR1,ADAMTS2
REACTOME_MAPK_FAMILY_SIGNALING_CASCADES	0.005618	0.039413	0.361874	1.47113	HGF,CDC42EP3,PSMB8,PSMB9,EREG,FGF5,PDGFRB,PDGFRA,JUN,EGFR,IL6ST,APBB1IP,CDC42EP2,MMP2,PSME1,DUSP7,CDC42EP5,AREG,DUSP6,PSME2,SPRED1,DUSP1,DUSP4,JAK1,FGFR1,RASA3,MYC,TLN1,PEA15,PSMF1,RAP1B,CCND3,KITLG,FYN,DUSP10,PSMD9,RAP1A,UBC,CAMK2D,NF1,HRAS,GDNF,SHC1,MAPK3,FGF1,HSPB1,PPP2R5B,PTPRA,CAMK2G
GO_RESPONSE_TO_STEROID_HORMONE	0.001838	0.02287	0.356362	1.47107	STC1,ASS1,CAV1,FOSL1,TSPO,PAM,NR2F2,CDKN1A,ANXA1,ENG,EGFR,SLIT2,CCND1,TGFB1I1,SERPINF1,ADAM9,TFPI,PTGS2,SFRP1,COL1A1,FOSB,ZFP36L2,PAPPA,TGFBR2,FHL2,AREG,LOX,IGFBP7,DAB2,PTN,THBS1,NR3C1,BAD,PPARG,SDC1,KANK2,BMP4,THRA,DUSP1,AR,RARG,RELA,TADA3,ZBTB7A
GO_CELLULAR_RESPONSE_TO_TOXIC_SUBSTANCE	0.007435	0.047318	0.374132	1.47087	ADIRF,PTGS1,HGF,SOD3,SPHK1,GSTM3,EGR1,SOD2,ANXA1,MSX1,AXL,NQO1,PTGS2,CAT,CCL7,GSTK1,MAP3K5,BAD,MAP1LC3A,MGST3,GSTO1,PRKAA1,PTEN,RELA,NFKB1,ESD,GPX1,SIRPA,STAT6,SIGMAR1,RHOB,MGST1,PRKCE,KLF4
GO_IMMUNE_RESPONSE_REGULATING_SIGNALING_PATHWAY	0.001767	0.02287	0.346234	1.46781	LGALS3,CAV1,CTSK,PSMB8,PSMB9,LPXN,CD47,TMEM173,CTSB,JUN,LY96,PRNP,ICOSLG,NFKBIA,CTSL,PSME1,BTN3A2,RFTN1,APPL2,NFKBIZ,ARPC1B,IRF1,COLEC12,RELB,RTN4,WIPF1,PSME2,TNIP1,TANK,MYO1C,RELA,MEF2C,RIPK2,TICAM1,NFKB1,ARPC1A,GBP1,RBCK1,PAG1,THEMIS2,IKBKG,PSMF1,IRAK3,CACNB3,RPS6KA3,F2RL1,IKBKE,CYFIP1,FYN,PRKCE,FOS,PSMD9,RAP1A,TIFA,ELF1,RAB7B,IRAK1,UBC,EIF2B3,MAPKAPK3,CD40,TRAF3,HRAS,RUNX1,HSPA1A,IKBKB,PIK3CD,…
GO_RESPONSE_TO_EXTRACELLULAR_STIMULUS	0.001776	0.02287	0.342512	1.46479	TNFRSF11B,STC1,ASS1,CD68,FOSL1,ITGA2,TSPO,GAS6,GSN,CDKN1A,JUN,NUCB2,EGFR,IFI16,CCND1,AXL,DAP,COMT,NQO1,SNAI2,ERCC1,PTGS2,CAT,SGIP1,TNC,SFRP1,COL1A1,WIPI1,TGFBR2,FAS,APPL2,NENF,G6PD,WDR45,IL1B,GSDMD,PTN,MAP3K5,GLRX2,RRAGA,RALB,PMAIP1,PPARG,TBL2,SIRT2,KANK2,MAP1LC3A,LDHA,LAMP2,PRKAA1,GLUL,ATG7,PTEN,RELA,MBD2,RNF152,LRP11,GAS2L1,SH3GLB1,GSS,ICAM1,ACAT1,CACNB3,GDF15,GABARAP,FYN,ZFP36,TRIM25,FOS,NAMPT…
REACTOME_INTERFERON_SIGNALING	0.007561	0.047839	0.382473	1.46396	CD44,SP100,PSMB8,MT2A,EGR1,B2M,IFI6,IFI35,GBP3,UBE2L6,IFITM2,ISG20,IRF1,IFNGR2,GBP2,TRIM8,JAK1,IRF2,GBP1,IFNAR1,ICAM1,TRIM25,OAS3,PML,TRIM38,FLNA,UBC,XAF1,CAMK2D,STAT1,UBE2E1,TRIM22,MAPK3,IFITM3
GO_NEGATIVE_REGULATION_OF_INTRACELLULAR_SIGNAL_TRANSDUCTION	0.001783	0.02287	0.341451	1.46305	CD44,CAV1,PLAUR,LPAR1,CARD19,RGS3,SERPINE2,CAMK2N1,OPTN,SOD2,TIMP2,FBLN1,SLIT2,PRNP,TIMP3,ATP2B4,SNAI2,PTGS2,HOMER3,SFRP1,BDKRB2,DUSP7,FHL2,BID,PYCARD,EMILIN1,GRINA,IL1B,DUSP6,MCL1,THBS1,ITGB1BP1,SMPD1,DLC1,ITGA3,CIB1,PBK,BMP4,TNIP1,RGS2,SPRED1,TAOK3,TANK,LIMD1,DUSP1,CLU,GSTO1,DUSP4,MAPKBP1,PRKAA1,PTEN,ITGB1,RELA,RASA3,MYC,GBP1,RNF152,PDCD4,HTRA2,ARHGEF2,PHLDA3,GPX1,RNF149,LITAF,IRAK3,SIRPA,F2RL1…
GO_NEGATIVE_REGULATION_OF_CATALYTIC_ACTIVITY	0.001718	0.02287	0.331738	1.46132	CD44,ECM1,PTX3,LGALS3,CAV1,HGF,MVP,PLAUR,COL6A3,GAS6,CAST,NR2F2,RGS3,CDKN1A,SERPINE2,CAMK2N1,CST3,ANXA1,TIMP2,SLIT2,IFI16,CD109,IFI6,PRNP,SERPINF1,SERPINB8,TIMP3,TIMP1,WWTR1,ATP2B4,NQO1,TFPI,RNH1,PTGS2,SERPINE1,PXK,SFRP1,SPOCD1,LXN,SERPINB6,CRYAB,DUSP7,PPP1R15A,TMBIM1,ANXA4,PYCARD,IL1B,DUSP6,PKIG,PTN,CDKN2A,C3,THBS1,ITGB1BP1,SMPD1,ANXA2,GADD45A,CIB1,HMSD,HHEX,PPARG,BMP4,RGS2,SPRED1,CARD16,TAOK3,D…
GO_RESPONSE_TO_ORGANIC_CYCLIC_COMPOUND	0.001704	0.02287	0.327966	1.45799	STC1,ASS1,CAV1,LUM,FOSL1,ITGA2,TSPO,PAM,TMEM173,LGALS1,NR2F2,GSN,CDKN1A,FAM210B,EGR1,PDGFRB,ANXA1,JUN,JUNB,ENG,EGFR,SLIT2,CCL2,CCND1,TGFB1I1,SERPINF1,IGFBP5,PTGES,COMT,ADAM9,ATP2B4,NQO1,SNAI2,CEBPB,TFPI,PTGS2,CAT,NFKBIA,TNC,SFRP1,COL1A1,CRYAB,FOSB,RFTN1,ZFP36L2,PAPPA,TGFBR2,FHL2,G6PD,FOXF1,IL1B,AREG,DUSP6,LOX,INSIG1,PLIN2,IGFBP7,ARPC1B,DAB2,PTN,COLEC12,THBS1,SMPD1,RALB,NR3C1,BAD,PMAIP1,SOCS2,PPAR…
GO_REGULATION_OF_RESPONSE_TO_STRESS	0.001577	0.02287	0.318293	1.45773	PLAU,CD44,APOD,NT5E,MGLL,PRRX1,CAV1,HGF,PLAUR,CTSK,ITGA2,PSMB8,PSMB9,LMNA,EREG,IL1R1,CD47,TMEM173,CTSB,CDKN1A,SERPINE2,PLAT,PDGFRA,OPTN,SOD2,ANXA1,LY96,MYLK,HTRA1,EGFR,MDFIC,IL6ST,IFI16,CD109,MSX1,SERPINF1,ATP2B4,SNAI2,CEBPB,ERCC1,TFPI,PTGS2,NFKBIA,SERPINE1,CTSL,ARL6IP5,SFRP1,PSME1,BDKRB2,TRADD,CRYAB,RFTN1,CXCL6,TGFBR2,HIC1,PPP1R15A,BID,F2R,FAS,APPL2,PYCARD,FOXF1,GRINA,IL1B,PLPP3,SASH1,INSIG1,NFK…
GO_POSITIVE_REGULATION_OF_HYDROLASE_ACTIVITY	0.00173	0.02287	0.330562	1.4577	CASP1,CAV1,ARHGAP22,ITGA2,RIN1,ASPH,CAV2,CHN1,GSN,LPAR1,RGS3,ARHGAP24,PDGFRB,RGS10,PDGFRA,NRP1,CASP4,JUN,EGFR,FBLN1,CCL2,IFI16,RGS17,DAP,CDC42EP2,ARL6IP5,SFRP1,SRGAP1,PSME1,PCOLCE,TRADD,IFT57,CCL7,ARHGAP18,PPP1R15A,BID,F2R,ARHGAP29,FAS,PYCARD,RHOC,MAP3K5,WNT5A,DLC1,C6orf89,RCN3,S100A10,RHOG,BAD,RIN2,ARHGDIA,PMAIP1,PSME2,PPARG,RGS2,SMAP2,EDNRA,GRN,TANK,ARHGAP21,ITGB1,FGFR1,MEF2C,RIPK2,RSU1,RASA3,A…
GO_RESPONSE_TO_TOXIC_SUBSTANCE	0.00177	0.02287	0.343702	1.45411	ADIRF,ASS1,PTGS1,HGF,FOSL1,SOD3,SPHK1,CAPN2,MT2A,GSTM3,GSN,CDKN1A,EGR1,PDGFRB,RGS10,SOD2,ANXA1,JUN,RGS17,CCND1,MSX1,AXL,ADAM9,NQO1,PTGS2,CAT,TNC,COL1A1,CRYAB,CCL7,GSTK1,KCNMA1,EPS8,G6PD,AREG,MAP3K5,GLRX2,BAD,HPRT1,SDC1,RGS2,MAP1LC3A,LDHA,DUSP1,MGST3,GSTO1,AHR,SDF4,PRKAA1,PTEN,RELA,SCN9A,NFKB1,ESD,HTRA2,MT1E,ICAM1,XPA,GPX1,SIRPA,STAT6,SIGMAR1,FYN,RHOB,MGST1,PRKCE,KLF4
GO_POSITIVE_REGULATION_OF_CELL_POPULATION_PROLIFERATION	0.001678	0.02287	0.324546	1.44176	ECM1,PRRX1,S100A6,CLEC11A,TBX3,FOSL1,ITGA2,SPHK1,CD248,CAV2,PID1,EREG,TSPO,GAS6,CD47,CDKN1A,FGF5,EGR1,PDGFRB,PDGFRA,TMEM119,NRP1,ANXA1,JUN,HTRA1,EGFR,IL6ST,CCND1,AKR1B1,CDH13,IGFBP5,ICOSLG,TIMP1,WWTR1,GRK5,PTGS2,TBX2,TNC,MMP2,SFRP1,DPP4,VEGFC,EMP2,CTSZ,DLL4,DDR2,CTHRC1,TGFBR2,F2R,ACVRL1,CDC25B,PYCARD,FOXF1,IL1B,AREG,TNFSF12,OSR2,LAMB1,TBX5,SERTAD1,S100A13,PTN,MAP3K5,RAC2,WNT5A,THBS1,ITGB1BP1,STX4…
REACTOME_ASPARAGINE_N_LINKED_GLYCOSYLATION	0.00365	0.030665	0.347382	1.43969	CD59,CTSC,KDELR3,COPZ2,CTSZ,PMM1,DCTN3,CNIH3,AREG,CTSA,MGAT1,ST3GAL4,ANKRD28,TUBA1A,DPM3,MGAT5,CAPZB,ST6GALNAC4,TUBB6,MVD,UAP1,COPG1,TMED3,TRAPPC1,CD55,ST3GAL5,ARFGAP3,SEC31A,EDEM3,SEC24D,SEC23A,SAR1B,OS9,MCFD2,ALG9,TUBB4B,GMPPA,SLC35C1,CAPZA1,COPB2,KDELR2,ST6GALNAC6,TUSC3,ALG3,TMED7,DCTN2,UBC,ALG5,TMED10,DCTN6,CSNK1D,FUT8,TRAPPC3,ANK1,B4GALT1,CNIH1,TMEM115,DYNC1I2,DAD1,ST3GAL3,STX5,ALG14,B4GALT2…
GO_PROTEOLYSIS	0.001548	0.02287	0.309924	1.43235	MMP1,ANPEP,PLAU,CD44,ECM1,CASP1,CAV1,HGF,PRSS3,PLAUR,CTSK,COL6A3,PSMB8,PSMB9,CAPN2,ASPH,MASP1,GAS6,DPP7,JOSD2,CAST,CTSC,GSN,PRSS23,CTSB,MME,C1R,SERPINE2,CAMK2N1,PLAT,CST3,CASP4,TIMP2,HTRA1,FBLN1,C1S,IFI16,CD109,ECE1,IFI6,PRNP,F10,TGFB1I1,ADAM33,USP53,MAP1A,SERPINF1,SERPINB8,DAP,TIMP3,TIMP1,TTC3,WWTR1,AEBP1,ADAM9,TFPI,ADAMTS6,PTGS2,NFKBIA,SERPINE1,CTSL,ARL6IP5,MMP2,SFRP1,LXN,PSME1,SERPINB6,DPP4,PC…
GO_CELLULAR_COMPONENT_DISASSEMBLY	0.001736	0.02287	0.328738	1.43091	MMP1,CD44,CAV1,CTSK,CAPN2,ASPH,TSPO,GSN,TRIOBP,OPTN,H1F0,CST3,TIMP2,HTRA1,MAP1A,TIMP1,SNAI2,CTSL,MMP2,DPP4,CFL2,DDR2,TWF2,WIPI1,LPIN1,EPS8,WDR45,STMN2,LIMA1,CHMP3,EXOG,C3,MRPL24,LRP1,TMOD3,CALCOCO2,MMP3,ADAM15,CIB1,FAP,BNIP3L,CAPG,MRPL36,NAV3,MAP1LC3A,TWF1,LAMP2,PLK3,FZD1,ATG7,MMP14,CAPZB,NEK6,NES,MRPL17,MYC,PRKCA,HTRA2,MRPS24,SNX14,ARHGEF2,VPS16,IRAK3,CAPN1,GABARAP,F2RL1,SMARCC2,HMGA1,MTPN,SMARC…
GO_CELLULAR_RESPONSE_TO_OXIDATIVE_STRESS	0.005671	0.039537	0.349577	1.4296	HGF,SOD3,SPHK1,PDGFRA,SOD2,ANXA1,JUN,EGFR,AXL,NQO1,CAT,ARL6IP5,MMP2,EPAS1,MSRA,MSRB3,G6PD,MAP3K5,GLRX2,MCL1,MPV17,MMP3,SIRT2,MAP1LC3A,PXN,FZD1,PRKAA1,ATG7,RELA,HTRA2,NCOA7,GPX1,SIRPA,PLA2R1,STAT6,SIGMAR1,FYN,MSRB2,RHOB,MGST1,KLF4,ALDH3B1,FOS,ERO1A,PML,MGMT,NET1,NUDT2,GPX8,ZNF580,FUT8,HSPA1A,FBLN5,TNFAIP3,RWDD1,AKT1,MAPK3,SLC25A24,HSPB1,NFE2L2,P4HB,MDM2
GO_POSITIVE_REGULATION_OF_PROTEOLYSIS	0.003656	0.030665	0.344185	1.42664	CASP1,CAV1,ASPH,CTSC,GSN,CASP4,FBLN1,IFI16,DAP,ADAM9,ARL6IP5,PSME1,PCOLCE,TRADD,IFT57,BID,F2R,FAS,PYCARD,IL1B,DAB2,MAP3K5,DLC1,RCN3,CCBE1,BAD,PMAIP1,PSME2,PPARG,SIRT2,TNIP1,GRN,TANK,CLU,PLK3,PTEN,MMP14,RIPK2,MYC,SNX9,CRADD,HTRA2,SOCS5
GO_REGULATION_OF_PROTEIN_POLYMERIZATION	0.007421	0.047297	0.364074	1.42637	CDC42EP3,GSN,TRIOBP,SLIT2,CDC42EP2,TWF2,ARHGAP18,EPS8,CDC42EP5,PYCARD,STMN2,ARPC1B,CDC42EP1,TPPP3,TMOD3,WIPF1,CAPG,NAV3,TWF1,MYO1C,CAPZB,ARPC1A,SNX9,ICAM1,BIN1,CYFIP1,MTPN,NIN,PRKCE,CAPZA1,TMSB10,CDC42EP4,HSPA1A,ARPC5,FMN1,MYADM,NCK1,ARL2,CTTN,RICTOR,SLAIN2,CLIP3,EVL,ARF6,ABL1,ACTR3,ARPIN,FHOD3
GO_CELLULAR_RESPONSE_TO_NITROGEN_COMPOUND	0.003521	0.030665	0.329116	1.42544	STC1,ASS1,CAV1,COL6A1,CAPN2,CAV2,PID1,ZEB1,TMEM173,VIM,EGR1,RGS10,PDGFRA,COL3A1,CASP4,EGFR,SLIT2,PRNP,AKR1B1,IGFBP5,ATP2B4,CEBPB,PTGS2,FBN1,MMP2,SFRP1,COL1A2,COL1A1,LPIN1,APPL2,IL1B,MAP3K5,COLEC12,RRAGA,TCIRG1,RALB,LRP1,MMP3,SOCS2,PPARG,CASP7,SIRT2,COL16A1,PXN,GNG2,VAMP2,SNX6,AHR,SLC9A1,MYO1C,PRKAA1,ATG7,PTEN,RELA,MEF2C,RIPK2,NFKB1,LEPROT,ATP6V0D1,MGARP,ANXA5,ARHGEF2,ICAM1,RAP1B,CCND3,GDF15,STAT6…
GO_REGULATION_OF_ION_TRANSPORT	0.003527	0.030665	0.336105	1.41906	STC1,LGALS3,CAV1,TSPO,AHNAK,GLRX,SERPINE2,EHD3,PDGFRB,TPCN1,MYLK,CCL2,B2M,PRNP,GEM,ATP2B4,CEBPB,PTGS2,PXK,ARL6IP5,HOMER3,KCNMA1,F2R,CNIH3,FABP3,G6PD,NTSR1,IL1B,TRPV2,GPM6B,THBS1,FXYD5,ANXA2,CD63,RGS2,VAMP2,GSTO1,SLC9A1,PTEN,CLIC1,FGFR1,MEF2C,SCN9A,TMEM109,ICAM1,BIN1,TCAF1,CAPN1,CACNB3,PLA2R1,FHL1,UBASH3B,FYN,HSPA2,ORAI1,PRKCE,CEMIP
GO_GLAND_DEVELOPMENT	0.003604	0.030665	0.338768	1.41845	ASS1,CAV1,HGF,TBX3,ITGA2,WLS,ARID5B,TSPO,PAM,DKK3,SERPINE2,PDGFRA,NRP1,ANXA1,CIT,JUN,EGFR,CCND1,MSX1,SERPINF1,IGFBP5,SNAI2,CEBPB,TBX2,TNC,SFRP1,TGFBR2,FOXF1,AREG,TWSG1,PTN,WNT5A,RTN4,SOCS2,HOXA9,BMP4,THRA,MSN,AR,RARG,PTEN,FGFR1,RELA,HAND2,CSF1,PLXND1,GPX1,PITX1,CAPN1,ACAT1,GATA2,STAT6
GO_NEGATIVE_REGULATION_OF_HYDROLASE_ACTIVITY	0.001812	0.02287	0.340374	1.41757	CD44,ECM1,PTX3,LGALS3,HGF,PLAUR,COL6A3,GAS6,CAST,SERPINE2,CST3,ANXA1,TIMP2,SLIT2,IFI16,CD109,IFI6,SERPINF1,SERPINB8,TIMP3,TIMP1,TFPI,PTGS2,SERPINE1,PXK,SPOCD1,LXN,SERPINB6,CRYAB,PPP1R15A,PTN,C3,THBS1,HMSD,RGS2,SPRED1,CARD16,MGAT5,AIP,PHACTR1,ANGPTL4,BIN1,PPP1R11,GPX1,MYO1D,PSMF1,PLA2R1,RPS6KA3,GPSM1,SPOCK1,KLF4,APLP2,TIPRL
GO_POSITIVE_REGULATION_OF_MAPK_CASCADE	0.005236	0.037486	0.334653	1.41522	CD44,HGF,IGFBP4,CAV2,GAS6,LPAR1,PDGFRB,PDGFRA,NRP1,JUN,TIMP2,EGFR,CCL2,MDFIC,GPNMB,ADAM9,ARL6IP5,CCL7,DUSP7,F2R,CSPG4,NENF,PYCARD,IL1B,SASH1,DUSP6,C1QTNF1,MAP3K5,WNT5A,THBS1,C1QTNF2,LRP1,GADD45A,CIB1,TNFRSF19,BMP4,TAOK3,ILK,S1PR2,AR,ZEB2,PRKAA1,PTEN,DBNL,FGFR1,RIPK2,HAND2,MAP2K3,PRKCA,MYDGF,PEA15,ICAM1,IKBKG,RAP1B,KITLG,BMPER,NPTN,GDF15,F2RL1,CD81,PRKCE,SH3RF3,RAP1A,NOTCH2,SORBS3,GNAI2,IL11,DAXX,…
GO_CELLULAR_RESPONSE_TO_DRUG	0.005545	0.039268	0.343835	1.41426	ADIRF,ASS1,HGF,SPHK1,MT2A,GAS6,VIM,EGR1,RGS10,ANXA1,EGFR,SLIT2,PRNP,MSX1,SERPINF1,AXL,NQO1,PTGS2,SFRP1,CCL7,IL1B,MAP3K5,NR3C1,MMP3,ADAM15,BAD,MAP1LC3A,AHR,PRKAA1,ATG7,PTEN,RELA,MEF2C,RIPK2,NFKB1,HMGA2,MYC,ARHGEF2,ICAM1,RNF149,RAP1B,SIRPA,STAT6,SIGMAR1,FYN,RHOB,PRKCE,KLF4,RAP1A,GNAI2,PDE4A,NET1,DAXX,ZNF580,PPM1F
GO_LIPID_METABOLIC_PROCESS	0.001621	0.02287	0.312698	1.41364	APOD,MGLL,CAV1,PTGS1,SPHK1,CAPN2,GLIPR1,TSPO,ENPP2,HACD4,PAM,DKK3,NR2F2,EGR1,PDGFRB,PDGFRA,ANXA1,RAB38,EGFR,CPNE3,AKR1B1,PTGES,COMT,CYB5R2,ELOVL1,GK,SNAI2,PTGS2,CAT,LRP10,FHL2,LPIN1,SERINC2,APPL2,FABP3,DECR1,CRYL1,G6PD,PLPP2,ZADH2,IL1B,PLPP3,CYB5R3,INSIG1,PLIN2,IGFBP7,INPP1,LIMA1,HSD3B7,TNFRSF1A,CBR1,C3,CTSA,SMPD1,ST3GAL4,GPC1,C1QTNF2,LRP1,CRAT,ECI2,NPAS2,DEGS1,AGPAT2,SLC22A4,SOCS2,PPARG,SIRT2,LS…
GO_POSITIVE_REGULATION_OF_DEVELOPMENTAL_PROCESS	0.001647	0.02287	0.311813	1.41318	ADIRF,ECM1,NBL1,DCN,HGF,SPHK1,CAPN2,LMNA,TSPO,ENPP2,GAS6,ZEB1,LPAR1,MME,TRIOBP,FAM210B,EGR1,SERPINE2,PDGFRB,EHD2,RRAS,TMEM119,HSPB6,SOD2,NRP1,FAM129B,ANXA1,JUN,JUNB,ENG,TIMP2,SLIT2,IL6ST,CCND1,TGFB1I1,TPBG,SERPINF1,AXL,CXCL8,CRABP2,WWTR1,BTG1,ADAM9,SNAI2,CEBPB,PTGS2,TBX2,SERPINE1,SFRP1,VEGFC,TRADD,COL1A1,DDR2,CTHRC1,TWF2,TGFBR2,DOCK5,ITGA5,ACVRL1,THBS2,IL1B,STMN2,SASH1,HOXA11,BEND6,TNFSF12,OSR2,T…
GO_REGULATION_OF_INTRACELLULAR_SIGNAL_TRANSDUCTION	0.001538	0.02287	0.303692	1.40971	CD44,ECM1,CASP1,DCN,CAV1,HGF,ARHGAP22,PLAUR,IGFBP4,S100A4,SLC20A1,SPHK1,WLS,CAV2,EREG,GAS6,LGALS1,CHN1,LPAR1,CARD19,RGS3,FGF5,SERPINE2,ARHGAP24,PDGFRB,CAMK2N1,RRAS,PDGFRA,OPTN,COL3A1,SOD2,NRP1,JUN,ENG,TIMP2,EGFR,FBLN1,SLIT2,CCL2,MDFIC,UACA,PRNP,F10,CDH13,MSX1,GPNMB,IGFBP5,AXL,TIMP3,ADAM9,SECTM1,ATP2B4,SNAI2,SSX2IP,PTGS2,CAT,NFKBIA,ARL6IP5,HOMER3,SFRP1,SRGAP1,BDKRB2,TRADD,CCL7,DUSP7,FHL2,ARHGAP18,…
GO_RESPONSE_TO_HORMONE	0.001656	0.02287	0.314536	1.40548	STC1,ASS1,CAV1,FOSL1,ITGA2,CAV2,PID1,EREG,TSPO,PAM,NR2F2,CTSB,CDKN1A,FAM210B,EGR1,PDGFRB,RGS10,ANXA1,JUN,JUNB,ENG,TIMP2,EGFR,SLIT2,CCND1,AKR1B1,TGFB1I1,SERPINF1,IGFBP5,TIMP3,TIMP1,ADAM9,NQO1,TFPI,PTGS2,CAT,CTSL,FBN1,TNC,SFRP1,COL1A1,CRYAB,FOSB,ZFP36L2,PAPPA,TGFBR2,FHL2,LPIN1,APPL2,FABP3,IL1B,AREG,LOX,IGFBP7,PLOD3,ARPC1B,DAB2,PTN,THBS1,TCIRG1,NR3C1,ANXA2,ITGA3,BAD,HHEX,SOCS2,PPARG,SDC1,KANK2,BMP4,…
GO_REGULATION_OF_HEMOPOIESIS	0.00363	0.030665	0.334975	1.4003	LGALS3,PSMB8,PSMB9,GAS6,ZEB1,FAM210B,ANXA1,JUN,B2M,AXL,CEBPB,NFKBIA,FBN1,SFRP1,PSME1,ZFP36L2,TGFBR2,LOXL3,LOX,NFKBIZ,IRF1,THBS1,CIB1,BAD,PSME2,HOXA9,BMP4,PRDM1,RARG,MMP14,MEF2C,RIPK2,MYC,PRKCA,CSF1,MEIS1,SOCS5,PSMF1,KITLG,IL4R,GATA2,CD83,UBASH3B,ZFP36,KMT2E,RB1,FOS,DUSP10,PSMD9,ZFP36L1,NOTCH2,RAB7B,P4HTM,HOXA7,STAT1,NF1,RUNX1,HSPA1A
GO_IMPORT_INTO_CELL	0.001739	0.02287	0.321648	1.40027	LGALS3,CAV1,ITGA2,RIN1,LOXL4,CAV2,ENPP2,MASP1,SH3KBP1,GSN,ACKR4,EHD2,B2M,PRNP,CDH13,AXL,CXCL8,ATP2B4,SGIP1,SERPINE1,ARL6IP5,TGFBR2,LRP10,APPL2,FABP3,VAMP4,PYCARD,NTSR1,LOXL3,GPM6B,EHD1,DAB2,WNT5A,C3,COLEC12,CD151,THBS1,SLC39A6,SCARB2,AP1S1,LRP1,ANXA2,CD63,RIN2,VPS28,WIPF1,PPARG,EEA1,RGS2,LGALS3BP,DNM1,CLTB,SCARA3,CLU,DPYSL2,SLC9A1,GLUL,DBNL,ITGB1,PI4KB,SNX17,SNX9,RIN3,CD9,BIN1,GATA2,PLA2R1,DENND1…
GO_POSITIVE_REGULATION_OF_TRANSPORT	0.001698	0.02287	0.315739	1.39985	STC1,PTX3,CASP1,LGALS3,CAV1,ITGA2,WLS,TSPO,GLRX,GAS6,CD47,EHD3,PDGFRB,EHD2,ANXA1,MYLK,EGFR,CCL2,B2M,PRNP,AXL,ABLIM3,ADAM9,CEBPB,PTGS2,NFKBIA,SGIP1,SERPINE1,VEGFC,BID,F2R,APPL2,FABP3,PYCARD,G6PD,NTSR1,IL1B,GSDMD,TRPV2,EHD1,DAB2,C1QTNF1,RAC2,WNT5A,C3,CD151,CAMK1,ITGB1BP1,STX4,C1QTNF2,LRP1,ANXA2,CD63,CIB1,BAD,VPS28,PMAIP1,PPARG,SDC1,DNM1,STX1A,SCP2,VAMP2,MSN,CLU,PLK3,BAG3,GSTO1,SLC9A1,GRP,MYO1C,PRKA…
GO_REGULATION_OF_LIPID_METABOLIC_PROCESS	0.003663	0.030665	0.337438	1.39883	APOD,CAV1,CAPN2,GLIPR1,TSPO,DKK3,EGR1,PDGFRB,PDGFRA,ANXA1,RAB38,SNAI2,PTGS2,FHL2,APPL2,FABP3,IL1B,INSIG1,PLIN2,IGFBP7,TNFRSF1A,C3,C1QTNF2,NPAS2,SOCS2,PPARG,LSS,ACADVL,PRKAA1,NFKB1,MVD,G0S2,FDPS,ANGPTL4,SOCS5,H2AFY,LMF1,ZBTB20,MVK,ABHD5,CD81,STARD4,SMARCD3,KLF4,RB1,NR1H2,MBTPS1,ORMDL2,FAM3A,ADM,LONP2,PPARD,PMVK,PPARA,TRIB3,WDR91,AKT1,PNPLA2
GO_POSITIVE_REGULATION_OF_CELL_DIFFERENTIATION	0.001684	0.02287	0.313258	1.39652	ADIRF,NBL1,HGF,CAPN2,TSPO,GAS6,ZEB1,LPAR1,MME,TRIOBP,FAM210B,SERPINE2,EHD2,TMEM119,SOD2,NRP1,FAM129B,ANXA1,JUN,JUNB,ENG,TIMP2,SLIT2,IL6ST,TGFB1I1,SERPINF1,AXL,CRABP2,WWTR1,BTG1,SNAI2,CEBPB,PTGS2,SERPINE1,SFRP1,VEGFC,COL1A1,DDR2,CTHRC1,TWF2,TGFBR2,DOCK5,ACVRL1,IL1B,STMN2,HOXA11,BEND6,TRPV2,TBX5,EHD1,NFKBIZ,DAB2,PTN,MAP3K5,WNT5A,CAMK1,SCARB2,GPC1,LRP1,S100A10,ANXA2,ITGA3,SAV1,CIB1,BAD,ARHGDIA,SOCS2…
GO_REGULATION_OF_ANATOMICAL_STRUCTURE_SIZE	0.003515	0.030665	0.329436	1.39576	CAV1,CDC42EP3,GSN,TRIOBP,PRR16,SOD2,NRP1,CIT,EGFR,SLIT2,ECE1,CRABP2,CDC42EP2,PTGS2,BDKRB2,CFL2,TWF2,DOCK5,ARHGAP18,KCNMA1,PPP1R15A,F2R,EPS8,CDC42EP5,PYCARD,TMEM123,TRPV2,PLOD3,LIMA1,ARPC1B,CDC42EP1,WNT5A,ITGB1BP1,LRP1,TMOD3,RTN4,WIPF1,CAPG,RGS2,EDNRA,TWF1,ILK,MSN,DPYSL2,RARG,MYO1C,PTEN,TNFRSF12A,CAPZB,ARPC1A,SNX9,LRRC8C,ICAM1,HP1BP3,BIN1,GPX1,F2RL1,CYFIP1,MTPN,PRKCE,CAPZA1,TMSB10,RAB22A,CDC42EP4,…
GO_SUPRAMOLECULAR_FIBER_ORGANIZATION	0.003497	0.030665	0.318001	1.39048	LUM,CDC42EP3,LOXL4,CD47,GSN,VIM,LPAR1,TRIOBP,PDGFRB,PDGFRA,COL3A1,NRP1,CST3,CIT,EFEMP2,SLIT2,MAP1A,AEBP1,CDC42EP2,SFRP1,COL1A2,EMP2,THSD4,COL1A1,CRYAB,CFL2,DDR2,TWF2,ARHGAP18,EPS8,COL5A3,CDC42EP5,PYCARD,RHOC,EMILIN1,LOXL3,STMN2,LOX,PLOD1,SLK,PLOD3,LIMA1,ARPC1B,CDC42EP1,RAC2,ITGB1BP1,DLC1,TPPP3,S100A10,TMOD3,RND3,ANXA2,RHOG,CIB1,DST,TUBGCP2,WIPF1,CAPG,RHOBTB3,NAV3,TWF1,PXN,ILK,MARCKS,CLU,PLK3,SLC9…
GO_POSITIVE_REGULATION_OF_PHOSPHORUS_METABOLIC_PROCESS	0.001647	0.02287	0.310208	1.38855	CD44,CAV1,HGF,PLAUR,IGFBP4,ITGA2,SPHK1,CAV2,EREG,ENPP2,GAS6,LPAR1,CDKN1A,EGR1,PDGFRB,PDGFRA,NRP1,JUN,ENG,TIMP2,EGFR,CCL2,MDFIC,IL6ST,CCND1,PRNP,GPNMB,ADAM9,ATP2B4,PTGS2,ARL6IP5,VEGFC,EMP2,CCL7,DDR2,DUSP7,TGFBR2,PPP1R15A,ITGA5,F2R,FAS,ACVRL1,CSPG4,NENF,CDC25B,PYCARD,IL1B,SASH1,AREG,DUSP6,FAM20A,SLK,TWSG1,FAM129A,TNFRSF1A,DAB2,C1QTNF1,MAP3K5,WNT5A,C3,THBS1,CAMK1,ITGB1BP1,SMPD1,DLC1,RALB,C1QTNF2,LRP…
GO_NEGATIVE_REGULATION_OF_DEVELOPMENTAL_PROCESS	0.001686	0.02287	0.310405	1.38312	TWIST2,TNFRSF11B,ECM1,DCN,CAV1,TBX3,CTSK,EREG,TSPO,GAS6,ZEB1,LGALS1,VIM,LPAR1,CDKN1A,COL3A1,NRP1,CST3,FAM129B,ANXA1,EGFR,FBLN1,SLIT2,CCDC85B,B2M,CCND1,TGFB1I1,MSX1,SERPINF1,IGFBP5,TIMP1,WWTR1,SNAI2,TBX2,NFKBIA,SERPINE1,FBN1,SFRP1,CTSZ,DLL4,SRGN,ZFP36L2,TGFBR2,APPL2,ACVRL1,G6PD,ZADH2,EMILIN1,LOXL3,THBS2,IL1B,STMN2,AREG,INSIG1,TWSG1,TBX5,PTN,IRF1,WNT5A,THBS1,ITGB1BP1,LRP1,ANXA2,SAV1,CIB1,RTN4,ARHGD…
GO_POSITIVE_REGULATION_OF_GTPASE_ACTIVITY	0.005445	0.038737	0.331089	1.38218	ARHGAP22,RIN1,CAV2,CHN1,RGS3,ARHGAP24,RGS10,NRP1,JUN,CCL2,RGS17,CDC42EP2,SFRP1,SRGAP1,CCL7,ARHGAP18,F2R,ARHGAP29,WNT5A,DLC1,S100A10,RHOG,RIN2,ARHGDIA,RGS2,SMAP2,ARHGAP21,ITGB1,RSU1,RASA3,ARHGEF1,TBC1D19,SNX9,RIN3,ICAM1,ARHGAP10,ARFGAP3,DOCK10,DENND1A,ALDH1A1,F2RL1,SEC23A,ASAP1,DOCK7,ASAP2,RAP1A,PLEKHG4,NET1,CD40,ARHGAP6,NF1,ACAP2,HRAS,SYDE1,TBC1D9B,NPRL2,TBC1D8,ACAP3,NTF3,ARHGAP35,ABR,DOCK4
GO_APOPTOTIC_PROCESS	0.001546	0.02287	0.297279	1.38131	TWIST2,TNFRSF11B,CD44,CASP1,LGALS3,CAV1,HGF,TBX3,PHLDA2,PLAUR,FOSL1,SP100,SPHK1,CD248,CAPN2,LMNA,TSPO,GAS6,SH3KBP1,PHLDA1,TMEM173,CAST,CTSC,LGALS1,GSN,LPAR1,CTSB,CDKN1A,EGR1,PDGFRB,HSPB6,SOD2,NRP1,H1F0,SRPX,FAM129B,ANXA1,CIT,CASP4,JUN,LY96,EGFR,EVA1A,SLIT2,IFI27L2,CCL2,IL6ST,IFI16,UACA,IFI6,PRNP,AKR1B1,USP53,MSX1,AXL,DAP,TIMP3,TIMP1,BTG1,GRK5,NQO1,SNAI2,CEBPB,PTGS2,CAT,NFKBIA,SERPINE1,CTSL,ARL6IP…
GO_G_PROTEIN_COUPLED_RECEPTOR_SIGNALING_PATHWAY	0.003584	0.030665	0.321715	1.37553	CXCL1,MGLL,MRGPRF,CAV1,SPHK1,CAV2,EREG,GNG11,LPAR1,RGS3,ACKR4,PDGFRB,RGS10,ANXA1,CCL2,RGS17,PDGFRL,CXCL8,ADGRE5,PTGIR,GNG12,ATP2B4,GRK5,HOMER3,BDKRB2,CCL7,CXCL6,F2R,NTSR1,RHOC,AREG,RAC2,WNT5A,C3,GPSM2,HEBP1,LRP1,PPARG,RGS2,EDNRA,DNM1,GNG2,S1PR2,FZD1,GRP,GAP43,ADGRL4,OGFR,ARHGEF1,PRKCA,NXPH4
GO_CELLULAR_LIPID_METABOLIC_PROCESS	0.001686	0.02287	0.308418	1.36888	APOD,MGLL,CAV1,PTGS1,SPHK1,ENPP2,HACD4,PAM,PDGFRB,PDGFRA,EGFR,AKR1B1,PTGES,ELOVL1,GK,PTGS2,CAT,LPIN1,SERINC2,APPL2,FABP3,DECR1,CRYL1,PLPP2,ZADH2,PLPP3,INSIG1,INPP1,TNFRSF1A,CBR1,C3,CTSA,SMPD1,ST3GAL4,GPC1,C1QTNF2,LRP1,CRAT,ECI2,DEGS1,AGPAT2,SLC22A4,SOCS2,PPARG,SIRT2,SDC1,PLPPR2,HADHB,LIPA,SCP2,ACADVL,ETFA,AGPAT3,PYURF,DPM3,PRKAA1,PTEN,ST6GALNAC4,MVD,PI4KB,SYNJ2,OSBPL5,AIG1,HTRA2,SOCS5,CES2,ACOX2,…
GO_SIGNAL_TRANSDUCTION_BY_PROTEIN_PHOSPHORYLATION	0.001689	0.02287	0.306809	1.36817	CD44,CAV1,HGF,IGFBP4,PSMB8,PSMB9,CAV2,EREG,GAS6,LPAR1,RGS3,FGF5,PDGFRB,CAMK2N1,RRAS,PDGFRA,NRP1,JUN,TIMP2,EGFR,FBLN1,CCL2,MDFIC,GPNMB,TIMP3,ADAM9,ARL6IP5,SFRP1,PSME1,CRYAB,CCL7,DUSP7,ZFP36L2,F2R,FAS,CSPG4,CDC42EP5,NENF,PYCARD,EMILIN1,IL1B,SASH1,AREG,DUSP6,SLK,C1QTNF1,MAP3K5,WNT5A,THBS1,ITGB1BP1,SMPD1,C1QTNF2,LRP1,GADD45A,CIB1,PSME2,TNFRSF19,PBK,BMP4,TNIP1,RGS2,SPRED1,TAOK3,DUSP1,ILK,S1PR2,DUSP4,A…
GO_REGULATION_OF_CELL_DEATH	0.00156	0.02287	0.295184	1.36321	TWIST2,CD44,CASP1,LGALS3,CAV1,HGF,TBX3,PLAUR,FOSL1,SP100,SPHK1,CD248,CAPN2,LMNA,TSPO,GAS6,CAST,CTSC,LGALS1,GSN,LPAR1,CTSB,CDKN1A,EGR1,PDGFRB,HSPB6,SOD2,NRP1,SRPX,FAM129B,ANXA1,CASP4,JUN,EGFR,SLIT2,CCL2,IL6ST,IFI6,PRNP,AKR1B1,MSX1,SERPINF1,GPNMB,AXL,DAP,TIMP3,TIMP1,BTG1,GRK5,NQO1,SNAI2,CEBPB,PTGS2,CAT,NFKBIA,SERPINE1,ARL6IP5,SFRP1,STK17A,BDKRB2,TRADD,CTSZ,IFT57,CRYAB,FHL2,KCNMA1,BID,ITGA5,F2R,TMBI…
GO_REGULATION_OF_CELL_DIFFERENTIATION	0.001585	0.02287	0.29489	1.36048	ADIRF,TWIST2,NBL1,PRRX1,LGALS3,CAV1,HGF,TBX3,CTSK,PSMB8,PSMB9,CAPN2,EREG,TSPO,GAS6,ZEB1,LGALS1,CHN1,VIM,LPAR1,MME,TRIOBP,FAM210B,SERPINE2,EHD2,PDGFRA,COL3A1,TMEM119,SOD2,NRP1,FAM129B,MAFF,ANXA1,JUN,JUNB,ENG,TIMP2,EGFR,FBLN1,SLIT2,CCDC85B,IL6ST,CD109,B2M,CCND1,TGFB1I1,MSX1,SERPINF1,IGFBP5,AXL,CRABP2,WWTR1,BTG1,SNAI2,CEBPB,PTGS2,NFKBIA,SERPINE1,CTSL,FBN1,SFRP1,PSME1,VEGFC,EMP2,CTSZ,LTBP4,COL1A1,DDR…
GO_REGULATION_OF_CYTOSKELETON_ORGANIZATION	0.005367	0.038243	0.315707	1.35985	CDC42EP3,CAPN2,PAM,CD47,GSN,LPAR1,TRIOBP,PDGFRB,PDGFRA,NRP1,CIT,SLIT2,MAP1A,CDC42EP2,SFRP1,CFL2,TWF2,ARHGAP18,EPS8,CDC42EP5,PYCARD,RHOC,STMN2,GPM6B,LIMA1,MYCBP2,ARPC1B,CHMP3,CDC42EP1,ITGB1BP1,DLC1,GPSM2,LRP1,S100A10,TMOD3,RND3,RHOG,CIB1,ARHGDIA,WIPF1,CAPG,RHOBTB3,NAV3,TWF1,PXN,ILK,SLC9A1,MYO1C,PRKAA1,MEF2C,PHLDB1,CAPZB,NES,FHOD1,ARPC1A,SNX9,RASSF1,ARHGEF2,SDC4,ICAM1,BIN1,PDCD6IP,F2RL1,CYFIP1,MTPN…
GO_RESPONSE_TO_ENDOGENOUS_STIMULUS	0.00157	0.02287	0.295159	1.35807	STC1,CD44,ASS1,NBL1,CAV1,CD68,COL6A1,FOSL1,ITGA2,CAPN2,CAV2,VEPH1,PID1,EREG,TSPO,PAM,ZEB1,DKK3,NR2F2,VIM,LTBP1,CTSB,RGMB,CDKN1A,FAM210B,FGF5,EGR1,PDGFRB,RGS10,PDGFRA,COL3A1,ANXA1,CASP4,JUN,JUNB,ENG,TIMP2,HTRA1,EGFR,SLIT2,CCL2,CD109,CCND1,PRNP,AKR1B1,TGFB1I1,CDH13,MSX1,SERPINF1,IGFBP5,CXCL8,TIMP3,TIMP1,ADAM9,ATP2B4,NQO1,SNAI2,CEBPB,TFPI,PTGS2,CAT,CTSL,FBN1,TNC,MMP2,SFRP1,COL1A2,LTBP4,DLL4,COL1A1,C…
GO_POSITIVE_REGULATION_OF_MULTICELLULAR_ORGANISMAL_PROCESS	0.00158	0.02287	0.29578	1.35751	ECM1,NBL1,CASP1,CAV1,HGF,LUM,ITGA2,SPHK1,EREG,TSPO,ENPP2,GAS6,ZEB1,IL1R1,TMEM173,LPAR1,MME,FAM210B,EGR1,SERPINE2,PDGFRB,RRAS,TMEM119,HSPB6,SOD2,NRP1,FAM129B,ANXA1,JUN,LY96,ENG,TIMP2,EGFR,SLIT2,IL6ST,IFI16,B2M,CCND1,TGFB1I1,TPBG,SERPINF1,AXL,CXCL8,CRABP2,WWTR1,BTG1,ADAM9,CEBPB,PTGS2,TBX2,SERPINE1,EPAS1,VEGFC,TRADD,COL1A1,POLR3GL,DDR2,CTHRC1,TWF2,TGFBR2,DOCK5,LPIN1,ITGA5,F2R,TMBIM1,APPL2,ACVRL1,DEC…
GO_MUSCLE_STRUCTURE_DEVELOPMENT	0.007067	0.045104	0.313936	1.35607	ASS1,DCN,CAV1,TBX3,COL6A3,CAPN2,CAV2,LMNA,ARID5B,EREG,ZEB1,LGALS1,NR2F2,EGR1,PDGFRB,EHD2,PDGFRA,COL3A1,SOD2,FAM129B,MAFF,VAMP5,MYLK,ENG,MSX1,IGFBP5,BTG1,TBX2,EPAS1,DLL4,CRYAB,CFL2,TGFBR2,FHL2,POPDC3,SMTN,G6PD,SGCE,FOXF1,LOX,TBX5,EHD1,MBNL1,SGCB,MAP3K5,WNT5A,CAMK1,TMEM204,GPC1,TMOD3,MYOF,SAV1,SIRT2,SDC1,BMP4,NFATC4,RGS2,ILK,SLC9A1,FZD1,HIVEP3,PRKAA1,PTEN,SGCD,MMP14,ITGB1,FGFR1,MEF2C,BHLHE41,SHOX2,…
GO_REGULATION_OF_TRANSPORT	0.001585	0.02287	0.294692	1.3528	STC1,APOD,PTX3,CASP1,LGALS3,CAV1,SP100,ITGA2,WLS,PID1,TSPO,AHNAK,PAM,GLRX,GAS6,CD47,SERPINE2,EHD3,PDGFRB,EHD2,NRP1,TPCN1,ANXA1,MYLK,EGFR,CCL2,MDFIC,B2M,PRNP,CDH13,AXL,GEM,COMT,ABLIM3,ADAM9,ATP2B4,CEBPB,PTGS2,NFKBIA,SGIP1,SERPINE1,PXK,ARL6IP5,HOMER3,SFRP1,STXBP6,DPP4,VEGFC,SRGN,CRYAB,KCNMA1,BID,F2R,CNIH3,ANXA4,APPL2,FABP3,VAMP4,PYCARD,G6PD,PFKL,NTSR1,FOXF1,IL1B,PKIG,INSIG1,GSDMD,TRPV2,GPM6B,EHD1,T…
GO_NEGATIVE_REGULATION_OF_CELL_DEATH	0.001645	0.02287	0.301493	1.35034	TWIST2,CD44,LGALS3,CAV1,HGF,TBX3,PLAUR,SPHK1,LMNA,GAS6,CAST,CDKN1A,PDGFRB,HSPB6,SOD2,NRP1,FAM129B,ANXA1,JUN,EGFR,CCL2,IL6ST,IFI6,PRNP,AKR1B1,MSX1,SERPINF1,GPNMB,AXL,TIMP1,GRK5,NQO1,SNAI2,CEBPB,PTGS2,CAT,NFKBIA,SERPINE1,SFRP1,BDKRB2,TRADD,CRYAB,FHL2,BID,ITGA5,F2R,TMBIM1,FAS,ANXA4,NTSR1,GRINA,IL1B,TMBIM4,DAB2,WNT5A,MCL1,THBS1,TMEM14A,LRP1,NPAS2,CIB1,BAD,BNIP3L,ARHGDIA,SOCS2,TFAP2A,KANK2,BMP4,NFATC4…
GO_SMALL_GTPASE_MEDIATED_SIGNAL_TRANSDUCTION	0.006993	0.044821	0.310372	1.34786	ARHGAP22,CDC42EP3,CHN1,LPAR1,CDKN1A,ARHGAP24,PDGFRB,RRAS,COL3A1,NRP1,JUN,TIMP2,RAB38,SLIT2,CDH13,RAB32,CDC42EP2,SSX2IP,SRGAP1,COL1A2,DOCK5,ARHGAP18,F2R,EPS8,ARHGAP29,CDC42EP5,RHOC,CDKN2A,CDC42EP1,RAC2,DLC1,RALB,GPSM2,RND3,ITGA3,RHOG,DOK1,RIN2,ARHGDIA,RHOBTB3,KANK2,SPATA13,ARHGEF40,ARHGAP21,DBNL,ITGB1,RASA3,ARHGEF1,CSF1,RASSF1,ARHGEF2,ARHGAP10,RAP1B,DOCK10,LPAR6,KITLG,DENND1A,F2RL1,CYFIP1,SQSTM1,D…
GO_EPITHELIAL_CELL_DIFFERENTIATION	0.005367	0.038243	0.31404	1.34428	STC1,LGALS3,CAV1,TBX3,CTSK,ITGA2,EREG,ZEB1,GSTM3,NR2F2,VIM,CTSB,CDKN1A,TRIOBP,NRP1,MAFF,ANXA1,JUN,ENG,CD109,CCND1,TGFB1I1,WWTR1,BTG1,ADAM9,CEBPB,SERPINE1,CTSL,GSTK1,ANXA4,TAGLN2,ACVRL1,FOXF1,IL1B,PLOD3,TNFRSF1A,DAB2,PTN,CBR1,WNT5A,ANXA2,SAV1,ADAMTSL4,BAD,RILPL2,PPARG,SDC1,BMP4,FAM20C,KRT10,ACADVL,THRA,S1PR2,COL18A1,MSN,AR,PRDM1,FZD1,ZEB2,RARG,FGFR1,MEF2C,FRMD6,TRIM16,H2AFY,ICAM1,WNT5B,GPX1,RAP1B,…
GO_EPITHELIUM_DEVELOPMENT	0.001653	0.02287	0.298475	1.34374	STC1,CD44,LGALS3,CAV1,HGF,TBX3,CTSK,APCDD1,ITGA2,PSMB8,PSMB9,EREG,ZEB1,GSTM3,NR2F2,VIM,CTSB,CDKN1A,TRIOBP,SERPINE2,NRP1,MAFF,ANXA1,JUN,ENG,EGFR,SLIT2,CD109,CCND1,TGFB1I1,MSX1,IGFBP5,WWTR1,BTG1,ADAM9,SNAI2,CEBPB,PPP2R3A,CAT,TBX2,SERPINE1,CTSL,TNC,SFRP1,PSME1,VEGFC,TRADD,CTSZ,IFT57,DLL4,CTHRC1,TGFBR2,GSTK1,ITGA5,ANXA4,TAGLN2,ACVRL1,RHOC,FOXF1,LOXL3,IL1B,AREG,HOXA11,PLOD3,TBX5,TNFRSF1A,DAB2,SMURF2,P…
GO_ENDOMEMBRANE_SYSTEM_ORGANIZATION	0.007067	0.045104	0.317138	1.34059	CAV1,CAV2,LMNA,GSN,SERPINE2,EHD3,EHD2,OPTN,TRAM2,CIT,RAB38,SGIP1,SRGN,LPIN1,F2R,VAMP4,LYST,CHMP3,SYNGR1,SCARB2,TMEM43,MYOF,RTN4,VPS28,DNM1,NDRG1,CLU,ARHGAP21,PLK3,AR,KIFC3,PTEN,NEK6,ANXA6,PRKCA,SNX9,TMED3,SH3GLB1,BIN1,PDCD6IP,MVB12A,SEC31A,PDE4DIP,SQSTM1,SYNE1,SEC61A1,ASAP1,STX2,BLOC1S1,RAB27A,RAB22A,ATL1,SYT11,TMED7,JAGN1,TMED10,VPS37B,BIN3,CSNK1D,BLZF1,REEP2,ARL1,TRIP11,FLOT1,AKT1,MAPK3,TMF1,AT…
GO_REGULATION_OF_MAPK_CASCADE	0.005263	0.037624	0.306832	1.33826	CD44,CAV1,HGF,IGFBP4,CAV2,GAS6,LPAR1,RGS3,PDGFRB,CAMK2N1,RRAS,PDGFRA,NRP1,JUN,TIMP2,EGFR,FBLN1,CCL2,MDFIC,GPNMB,TIMP3,ADAM9,ARL6IP5,SFRP1,CCL7,DUSP7,F2R,FAS,CSPG4,NENF,PYCARD,EMILIN1,IL1B,SASH1,DUSP6,C1QTNF1,MAP3K5,WNT5A,THBS1,ITGB1BP1,SMPD1,C1QTNF2,LRP1,GADD45A,CIB1,TNFRSF19,PBK,BMP4,TNIP1,RGS2,SPRED1,TAOK3,DUSP1,ILK,S1PR2,DUSP4,AR,ZEB2,PRKAA1,PTEN,DBNL,FGFR1,RIPK2,HAND2,MYC,GBP1,MAP2K3,PRKCA,PD…
GO_POSITIVE_REGULATION_OF_MOLECULAR_FUNCTION	0.001548	0.02287	0.289068	1.33778	CASP1,CXCL1,LGALS3,CAV1,HGF,ARHGAP22,PLAUR,FOSL1,ITGA2,SPHK1,RIN1,ASPH,CAV2,ARID5B,EREG,GLRX,GAS6,TMEM173,CHN1,GSN,LPAR1,RGS3,CDKN1A,EGR1,ARHGAP24,EHD3,PDGFRB,RGS10,PDGFRA,NRP1,H1F0,FAM129B,CASP4,JUN,TIMP2,EGFR,FBLN1,CCL2,MDFIC,IFI16,RGS17,B2M,CCND1,PRNP,DAP,LARP6,ADAM9,ATP2B4,CDC42EP2,CAT,ARL6IP5,SFRP1,SRGAP1,PSME1,PCOLCE,TRADD,EMP2,IFT57,CCL7,DDR2,DUSP7,CTHRC1,TGFBR2,ARHGAP18,SERINC2,PPP1R15A,B…
GO_CELL_CELL_ADHESION	0.007042	0.045072	0.308131	1.33546	CD44,ASS1,NT5E,LGALS3,CAV1,CLDN11,GAS6,CD47,LGALS1,SERPINE2,PDGFRA,ANXA1,EGFR,CCL2,IL6ST,PRNP,CDH13,GPNMB,SERPINB8,ICOSLG,COL13A1,ADAM9,SNAI2,CEBPB,CERCAM,STXBP6,DPP4,TGFBR2,ITGA5,PYCARD,FOXF1,LOXL3,IL1B,PLPP3,ROBO3,LAMB1,TWSG1,NFKBIZ,S100A11,C1QTNF1,IRF1,CDC42EP1,RAC2,WNT5A,FXYD5,TMOD3,ANXA2,BAD,BMP4,TNIP1,PIEZO1,ILK,MSN,PARVA,KIFC3,CLIC1,ITGB1,RELA,RIPK2,PRKCA,TLN1,SOCS5,CD9,PAG1,CD55,TNFRSF14,…
GO_OXIDATION_REDUCTION_PROCESS	0.001653	0.02287	0.295929	1.32476	APOD,PTGS1,PHLDA2,SOD3,LOXL1,LOXL4,ASPH,MOXD1,PID1,PAM,GLRX,ETHE1,SOD2,IL6ST,AKR1B1,COX7A1,PTGES,CYB5R2,NQO1,CBR3,PTGS2,CAT,P4HA2,AKR7A2,MSRA,MSRB3,SH3BGRL3,GSTK1,PYROXD2,BID,APPL2,FABP3,DECR1,CRYL1,G6PD,ZADH2,ACO1,BLVRA,LOXL3,CYB5R3,LOX,PLOD1,PLOD3,IMPDH1,HSD3B7,CYBRD1,DHRS7,GLRX2,CBR1,BLVRB,SMOX,C1QTNF2,CRAT,ECI2,DEGS1,PPARG,VKORC1,NFATC4,QSOX1,HADHB,LDHA,OGFOD3,SCP2,ACADVL,ETFA,DHRS4L2,GSTO1,P…
GO_POSITIVE_REGULATION_OF_CELLULAR_COMPONENT_ORGANIZATION	0.001637	0.02287	0.291816	1.32463	MMP1,DCN,CAV1,HGF,PLAUR,CDC42EP3,ITGA2,SPHK1,CAPN2,LMNA,EREG,ENPP2,CD47,GSN,LPAR1,TRIOBP,PDGFRB,EHD2,OPTN,NRP1,ANXA1,SLIT2,B2M,TPBG,MSX1,SERPINF1,AXL,CRABP2,ABLIM3,ADAM9,CDC42EP2,SNAI2,ERCC1,SGIP1,SERPINE1,SFRP1,CFL2,DDR2,TWF2,DOCK5,PPP1R15A,BID,EPS8,APPL2,CDC42EP5,PYCARD,RHOC,EMILIN1,THBS2,IL1B,STMN2,TRPV2,EHD1,ARPC1B,DAB2,PTN,CDC42EP1,RAC2,WNT5A,C3,CD151,CAMK1,ITGB1BP1,C6orf89,TPPP3,SCARB2,RALB…
REACTOME_VESICLE_MEDIATED_TRANSPORT	0.005137	0.036838	0.296381	1.31301	RIN1,CD59,EREG,MASP1,SH3KBP1,CTSC,OPTN,COL3A1,KDELR3,RAB38,EGFR,COPZ2,RAB32,SGIP1,COL1A2,CTSZ,COL1A1,DCTN3,CNIH3,VAMP4,AREG,DAB2,CHMP3,WNT5A,COLEC12,PLIN3,STX4,SCARB2,AP1S1,LRP1,COPS7A,ANKRD28,RIN2,VPS28,RHOBTB3,STX10,TUBA1A,DNM1,CLTB,AGPAT3,VAMP2,MYO1C,TGOLN2,PRKAG1,CAPZB,USE1,ARPC1A,NAA38,TUBB6,COPS6,SYNJ2,SNX9,COPG1,RIN3,TMED3,TRAPPC1,CD55,BIN1,HPS1,AP1M1,ARFGAP3,MVB12A,SEC31A,DENND1A,SEC24D,S…
GO_CELLULAR_RESPONSE_TO_ENDOGENOUS_STIMULUS	0.001603	0.02287	0.286566	1.30486	STC1,CD44,ASS1,NBL1,CAV1,COL6A1,ITGA2,CAPN2,CAV2,VEPH1,PID1,ZEB1,DKK3,NR2F2,VIM,LTBP1,CTSB,RGMB,FAM210B,FGF5,EGR1,PDGFRB,RGS10,PDGFRA,COL3A1,ANXA1,CASP4,JUN,JUNB,ENG,HTRA1,EGFR,SLIT2,CCL2,CD109,PRNP,AKR1B1,TGFB1I1,MSX1,SERPINF1,IGFBP5,CXCL8,ADAM9,ATP2B4,SNAI2,CEBPB,TFPI,PTGS2,CTSL,FBN1,TNC,MMP2,SFRP1,COL1A2,LTBP4,DLL4,COL1A1,FOSB,ZFP36L2,TGFBR2,FHL2,LPIN1,APPL2,ACVRL1,EMILIN1,IL1B,STMN2,LOX,IGFBP…
GO_NEGATIVE_REGULATION_OF_MOLECULAR_FUNCTION	0.003373	0.030665	0.288326	1.29251	CD44,ECM1,PTX3,LGALS3,CAV1,HGF,MVP,PLAUR,SP100,COL6A3,GAS6,DKK3,CAST,NR2F2,RGS3,CDKN1A,SERPINE2,CAMK2N1,CST3,ANXA1,JUN,TIMP2,SLIT2,IFI16,CD109,B2M,IFI6,PRNP,MSX1,SERPINF1,SERPINB8,DAP,TIMP3,GEM,TIMP1,WWTR1,ATP2B4,NQO1,TFPI,RNH1,PTGS2,CAT,NFKBIA,SERPINE1,PXK,SFRP1,SPOCD1,LXN,SERPINB6,CTSZ,CRYAB,DUSP7,PPP1R15A,TMBIM1,ANXA4,PYCARD,IL1B,DUSP6,PKIG,DAB2,PTN,CDKN2A,C3,THBS1,CAMK1,ITGB1BP1,SMPD1,LY6E,RA…
GO_REGULATION_OF_PHOSPHORUS_METABOLIC_PROCESS	0.001577	0.02287	0.278553	1.2849	CD44,LGALS3,CAV1,HGF,MVP,PLAUR,IGFBP4,ITGA2,SPHK1,CAV2,PID1,EREG,TSPO,ENPP2,GAS6,NR2F2,LPAR1,RGS3,CDKN1A,EGR1,PDGFRB,CAMK2N1,RRAS,PDGFRA,NRP1,JUN,ENG,TIMP2,EGFR,FBLN1,SLIT2,CCL2,MDFIC,IL6ST,CD109,CCND1,PRNP,GPNMB,COX7A1,TIMP3,WWTR1,ADAM9,ATP2B4,PTGS2,PPP2R3A,ARL6IP5,SFRP1,SPOCD1,BDKRB2,VEGFC,EMP2,CCL7,DDR2,DUSP7,TGFBR2,PPP1R15A,ITGA5,F2R,FAS,ACVRL1,CSPG4,NENF,CDC25B,PYCARD,EMILIN1,IL1B,PLPP3,SASH…
GO_NEGATIVE_REGULATION_OF_PROTEIN_METABOLIC_PROCESS	0.004959	0.035616	0.284063	1.27754	CD44,ECM1,APOD,PTX3,LGALS3,CAV1,HGF,MVP,PLAUR,COL6A3,PID1,TSPO,GAS6,CAST,NR2F2,RGS3,CDKN1A,SERPINE2,CAMK2N1,PLAT,CST3,JUN,ENG,TIMP2,FBLN1,SLIT2,IFI16,CD109,IFI6,PRNP,MAP1A,SERPINF1,IGFBP5,SERPINB8,TIMP3,TIMP1,WWTR1,ATP2B4,TFPI,PTGS2,SERPINE1,SFRP1,LXN,SERPINB6,BDKRB2,CTSZ,CRYAB,DUSP7,ZFP36L2,PPP1R15A,PYCARD,G6PD,EMILIN1,IL1B,PLPP3,DUSP6,PKIG,FAM129A,CHAC1,PTN,CDKN2A,C3,THBS1,ITGB1BP1,SMPD1,ANXA2,…
GO_POSITIVE_REGULATION_OF_CATALYTIC_ACTIVITY	0.006299	0.040741	0.276695	1.26734	CASP1,CXCL1,CAV1,HGF,ARHGAP22,ITGA2,RIN1,ASPH,CAV2,EREG,GAS6,CHN1,GSN,LPAR1,RGS3,CDKN1A,EGR1,ARHGAP24,PDGFRB,RGS10,PDGFRA,NRP1,CASP4,JUN,TIMP2,EGFR,FBLN1,CCL2,MDFIC,IFI16,RGS17,CCND1,PRNP,DAP,ADAM9,ATP2B4,CDC42EP2,ARL6IP5,SFRP1,SRGAP1,PSME1,PCOLCE,TRADD,EMP2,IFT57,CCL7,DDR2,DUSP7,TGFBR2,ARHGAP18,SERINC2,PPP1R15A,BID,F2R,ARHGAP29,FAS,CSPG4,CDC25B,PYCARD,RHOC,IL1B,SASH1,DUSP6,FAM20A,SLK,MAP3K5,WNT5…
GO_POSITIVE_REGULATION_OF_PROTEIN_METABOLIC_PROCESS	0.006289	0.040741	0.270645	1.24772	CD44,CASP1,CAV1,HGF,PLAUR,IGFBP4,ITGA2,SPHK1,ASPH,CAV2,LMNA,EREG,ENPP2,GAS6,CTSC,GSN,VIM,LPAR1,CDKN1A,EGR1,PRR16,PDGFRB,PDGFRA,NRP1,CASP4,JUN,ENG,TIMP2,EGFR,FBLN1,CCL2,MDFIC,IL6ST,IFI16,CCND1,PRNP,GPNMB,DAP,LARP6,ADAM9,ATP2B4,SNAI2,PTGS2,NFKBIA,ARL6IP5,PSME1,VEGFC,PCOLCE,TRADD,EMP2,IFT57,CCL7,DDR2,DUSP7,TGFBR2,PPP1R15A,BID,ITGA5,F2R,FAS,ACVRL1,CSPG4,NENF,CDC25B,PYCARD,IL1B,SASH1,AREG,DUSP6,FAM20A…
GO_PROTEIN_PHOSPHORYLATION	0.006182	0.040649	0.262681	1.22048	CD44,CAV1,HGF,MVP,PLAUR,IGFBP4,PSMB8,SPHK1,PSMB9,CAV2,PID1,EREG,ENPP2,GAS6,NR2F2,LPAR1,RGS3,CDKN1A,FGF5,EGR1,PDGFRB,CAMK2N1,RRAS,PDGFRA,NRP1,CIT,JUN,MYLK,ENG,TIMP2,EGFR,FBLN1,SLIT2,CCL2,MDFIC,IL6ST,CPNE3,CD109,CCND1,PRNP,GPNMB,AXL,DYRK4,TIMP3,WWTR1,ADAM9,ATP2B4,GRK5,PTGS2,ARL6IP5,SFRP1,PSME1,STK17A,BDKRB2,VEGFC,EMP2,CRYAB,CCL7,DDR2,DUSP7,ZFP36L2,TGFBR2,ITGA5,F2R,FAS,ACVRL1,CSPG4,CDC42EP5,NENF,CDC…

## Sheet: Table S7
Table S7. Uniquely assigned marker genes divided by cluster.
Gene Symbol	Cluster	Log2FC	FDR
ARGFX	DR1	4.11358	0
AFP	DR1	3.69259	0
SPINK5	DR1	3.49381	7.21e-272
PCAT14	DR1	3.44426	0
LIM2	DR1	3.26892	0
BANCR	DR1	3.25711	0
HOXB-AS1	DR1	3.12555	0
KCNK1	DR1	3.12182	0
APELA	DR1	3.12086	0
PTPRR	DR1	3.11422	0
SERPINB9	DR1	3.07382	0
MX1	DR1	2.97865	0
C9orf135	DR1	2.9582	0
A4GALT	DR1	2.91319	0
TUBB4A	DR1	2.91281	0
SCARA5	DR1	2.85986	0
C6orf141	DR1	2.75332	0
CD83	DR1	2.71522	7.66e-248
GLIPR1L1	DR1	2.69424	1.66e-301
HHIP	DR1	2.66202	0
PROM1	DR1	2.5834	0
RP11-10A14.6	DR1	2.55487	1.67e-248
TACSTD2	DR1	2.54975	1.03e-213
FRAT2	DR1	2.5251	2.79e-265
CALB1	DR1	2.5074	0
ARMT1	DR1	2.48283	0
RNF125	DR1	2.43962	3.67e-306
PLA2G4A	DR1	2.34398	3.77e-206
SUN3	DR1	2.32961	6.54e-238
TNFSF9	DR1	2.32047	2.97e-235
CA8	DR1	2.31447	4.9e-220
CD70	DR1	2.30554	5.47e-244
CD177	DR1	2.28695	7.92e-199
TPTEP1	DR1	2.28375	6.35e-49
AC091493.2	DR1	2.24978	6.95e-193
TMEM155	DR1	2.24306	4.28e-258
DDIT4L	DR1	2.20782	1.51e-199
GPAT3	DR1	2.19908	4.95e-202
ASRGL1	DR1	2.19187	4.39e-252
RP11-359M6.1	DR1	2.18507	7.27e-240
HOXB2	DR1	2.1461	8.07e-176
SLC16A10	DR1	2.13305	4.59e-254
JPH1	DR1	2.13001	1.65e-234
MT1H	DR1	2.12116	3.23e-181
RCN2	DR1	2.11231	0
CHMP4C	DR1	2.1038	3.42e-234
AK4	DR1	2.08328	2.92e-292
MSC	DR1	2.05946	3.05e-198
TFAP2C	DR1	2.02526	7.25e-228
MT1G	DR1	2.01506	1.18e-191
SUSD2	DR1	2.0121	2.06e-187
ALPPL2	DR1	2.01111	6.84e-145
HOXA1	DR1	1.973	2.21e-158
EPB41L5	DR1	1.97046	2.15e-160
SOWAHD	DR1	1.95859	4.32e-148
NFKB2	DR1	1.95667	9.13e-187
SOSTDC1	DR1	1.95061	8.11e-206
LINC00707	DR1	1.94162	8.37e-122
RP11-148B6.2	DR1	1.92615	2.9e-176
FER	DR1	1.89991	7.37e-75
MEIOB	DR1	1.88207	4.23e-101
WARS	DR1	1.85871	2.64e-267
FGFR3	DR1	1.84652	4.8e-124
SLC16A9	DR1	1.8291	1.15e-143
ASH2L	DR1	1.8172	3.03e-228
RAB15	DR1	1.79369	2.19e-157
ATRNL1	DR1	1.79188	2.17e-112
TMEM64	DR1	1.77297	1.53e-176
AADAT	DR1	1.75848	1.13e-114
RRAGD	DR1	1.73949	5.97e-134
TMX1	DR1	1.73549	1.19e-226
SYT6	DR1	1.7223	4.19e-198
LGALSL	DR1	1.71816	3.27e-189
ANXA3	DR1	1.71316	2.81e-200
SLC39A8	DR1	1.69324	2.93e-116
WNK2	DR1	1.6833	3.86e-164
LINC00545	DR1	1.67969	3.83e-152
FAM92A1	DR1	1.67709	1.95e-141
PCGF5	DR1	1.67213	3.37e-156
B3GALT5-AS1	DR1	1.67102	3.45e-122
PRUNE2	DR1	1.66861	2.64e-116
FUT8-AS1	DR1	1.66661	1.24e-110
MKRN1	DR1	1.66213	4.6e-212
ATAD3B	DR1	1.65451	1.97e-233
PRKAR2B	DR1	1.65236	7.39e-176
SMAD1	DR1	1.6469	5.71e-142
PCSK9	DR1	1.62713	7.47e-140
VSIG10	DR1	1.62283	1.89e-178
HOXD13	DR1	1.61954	1.58e-102
F3	DR1	1.61586	3.16e-176
LRRC6	DR1	1.59587	2.69e-67
SLC25A4	DR1	1.59266	1.38e-255
RIMS2	DR1	1.59115	2.18e-51
CDO1	DR1	1.58696	1.83e-118
HHIP-AS1	DR1	1.58631	9.46e-96
HERC5	DR1	1.57829	6.02e-136
TBC1D23	DR1	1.57416	1.1e-168
RNF138	DR1	1.56107	2.07e-160
STK38L	DR1	1.55233	1.42e-141
ETV4	DR1	1.54445	2.55e-178
YRDC	DR1	1.54439	2.2e-187
SLCO5A1	DR1	1.5441	1.61e-100
PVR	DR1	1.52256	1.81e-148
TSPAN33	DR1	1.50895	2.62e-100
KLF5	DR1	1.49837	5.2e-125
CENPV	DR1	1.4958	6.32e-185
CHCHD7	DR1	1.49565	1.08e-179
TDRP	DR1	1.49252	2.88e-169
FA2H	DR1	1.48575	1.34e-98
TMEM51	DR1	1.48564	7.35e-93
TCP1	DR1	1.48	0
DNAH11	DR1	1.47965	8.03e-66
UBE2S	DR1	1.47326	1.8e-198
NFYB	DR1	1.46798	3.81e-141
XXbac-BPG27H4.8	DR1	1.46226	1.3e-94
SMS	DR1	1.45383	1.11e-259
BICD1	DR1	1.43314	1.92e-119
ST6GAL1	DR1	1.42924	9.07e-126
PTH1R	DR1	1.42761	3.72e-86
FILIP1	DR1	1.42501	6.31e-128
CCNA2	DR1	1.42367	2.45e-169
PYGL	DR1	1.41972	1.46e-180
ABHD17B	DR1	1.41096	8.35e-138
FAM69B	DR1	1.38234	4.5e-108
RABGGTB	DR1	1.37655	2.4e-171
NARS2	DR1	1.36749	9.05e-123
CCNC	DR1	1.36361	3.41e-246
NDC80	DR1	1.36224	4.29e-128
MAD2L1	DR1	1.35897	1.02e-172
GCH1	DR1	1.35839	8.25e-67
SESTD1	DR1	1.35797	2.21e-97
TEAD4	DR1	1.3533	6.81e-170
PLCD1	DR1	1.34997	9.86e-104
GLOD4	DR1	1.34429	7.33e-224
CCDC86	DR1	1.3424	4.59e-153
RCC1	DR1	1.33255	6.04e-171
PRR15	DR1	1.33032	1.22e-64
PLK1	DR1	1.32936	3.39e-101
PDP1	DR1	1.32639	2e-82
PRAP1	DR1	1.32419	5.28e-59
TSPAN13	DR1	1.32316	6.82e-145
AEN	DR1	1.32007	1.07e-141
WDR77	DR1	1.31715	5.69e-222
WDR4	DR1	1.31525	9.9e-178
EXOSC9	DR1	1.31027	1.68e-170
TOMM40	DR1	1.30386	3.38e-250
MMP16	DR1	1.30231	5.25e-87
SLC12A2	DR1	1.29859	5.97e-63
TRIM9	DR1	1.28884	1.09e-59
CHPT1	DR1	1.28639	1.34e-144
LYPLA1	DR1	1.28598	1.98e-239
SH3RF1	DR1	1.27494	3.04e-104
TOE1	DR1	1.27492	1.97e-121
MRPL39	DR1	1.27244	3.54e-161
STEAP1	DR1	1.27062	5.35e-89
GSTP1	DR1	1.25469	3.15e-286
RNF126	DR1	1.25099	5.35e-191
MRPL18	DR1	1.24714	8.41e-234
NUP93	DR1	1.24704	3.91e-143
GYG1	DR1	1.24267	3.26e-132
NCBP2-AS2	DR1	1.24207	9.64e-158
MTHFD1L	DR1	1.2404	4.32e-176
TPD52L1	DR1	1.23971	1.22e-114
LINC00672	DR1	1.2333	1.08e-65
RCL1	DR1	1.23176	1.44e-98
PODXL2	DR1	1.22862	3.81e-104
TGIF1	DR1	1.22628	2.29e-174
BARD1	DR1	1.22525	1.52e-116
TOR3A	DR1	1.21707	8.44e-120
NDUFC2	DR1	1.2151	0
RAD51	DR1	1.21393	7.54e-101
B4GALT4	DR1	1.21368	7.72e-109
NDUFAB1	DR1	1.21338	1.74e-303
TLE1	DR1	1.2085	9.51e-122
ID1	DR1	1.19909	1.39e-79
AHCY	DR1	1.19895	3.37e-223
BOP1	DR1	1.19769	3.75e-166
BAK1	DR1	1.19665	3.51e-128
MAPRE2	DR1	1.19433	2.53e-81
SPSB2	DR1	1.19323	6.77e-92
CLPTM1L	DR1	1.19152	1.08e-141
TM7SF3	DR1	1.1889	4.8e-153
PHF5A	DR1	1.1802	8.35e-205
TRAP1	DR1	1.16969	2.23e-188
ODC1	DR1	1.16863	1.79e-114
ADGRL2	DR1	1.16231	1.34e-81
CHST7	DR1	1.15746	3.81e-70
TRIP13	DR1	1.15537	2.91e-114
GCA	DR1	1.14866	1.25e-78
GRK6	DR1	1.14287	3.77e-111
SLIRP	DR1	1.14259	4.26e-252
HOTAIRM1	DR1	1.13563	5.2e-59
ARL6IP6	DR1	1.13274	1.72e-124
PELI1	DR1	1.13201	1.21e-87
NIPA2	DR1	1.1298	8.73e-168
NXT2	DR1	1.12879	2.92e-77
SH3BP4	DR1	1.12685	1.32e-74
DLEU2	DR1	1.12648	1.41e-85
CDCA4	DR1	1.12573	2.31e-121
PNO1	DR1	1.12241	2.76e-144
GNPTAB	DR1	1.12066	2.34e-83
EXPH5	DR1	1.12055	4.9e-51
GTPBP3	DR1	1.12037	6.25e-87
RFC3	DR1	1.1198	2.18e-115
BFAR	DR1	1.11846	1.62e-176
EIF3B	DR1	1.11716	1.43e-178
NOL11	DR1	1.11552	2.21e-124
CPSF6	DR1	1.1116	1.88e-174
LRP6	DR1	1.11064	8.13e-69
DPH6	DR1	1.10052	2.18e-87
DUS1L	DR1	1.09964	4.59e-113
MAPRE1	DR1	1.09715	5.16e-182
PTP4A1	DR1	1.09642	3.4e-140
NOC2L	DR1	1.09248	2.18e-166
KCNMB4	DR1	1.09127	3.73e-100
NCBP2	DR1	1.08679	1.66e-221
SAT1	DR1	1.08457	5.41e-103
OLA1	DR1	1.08355	5.89e-214
TMEM237	DR1	1.08201	4.31e-92
SURF6	DR1	1.07974	4.18e-113
TBRG4	DR1	1.07768	8.19e-156
HUS1	DR1	1.07605	2.19e-75
NDUFV2	DR1	1.07598	1.43e-268
PPIL1	DR1	1.07534	7.81e-140
SLC30A1	DR1	1.07243	1.41e-76
NSUN2	DR1	1.0723	7.1e-92
MFF	DR1	1.0696	2.44e-172
CTC-524C5.2	DR1	1.06919	9.83e-123
GNPNAT1	DR1	1.06461	7.89e-115
RUVBL1	DR1	1.06364	5.73e-197
SRSF2	DR1	1.06245	3.46e-251
TCF19	DR1	1.06211	1.97e-68
MZT1	DR1	1.06197	1.31e-138
TMX2	DR1	1.0537	3.43e-158
RALGAPA2	DR1	1.05171	2.94e-18
SGTA	DR1	1.05168	2.82e-130
UBE2E1	DR1	1.05117	9.38e-173
PPAN	DR1	1.04587	3.09e-119
SRSF1	DR1	1.04115	2.79e-158
HNRNPF	DR1	1.03827	1.67e-186
MCL1	DR1	1.03715	6.4e-136
ICMT	DR1	1.03615	1.73e-122
BCL2L12	DR1	1.03512	1.14e-161
PPP1CC	DR1	1.02868	2.91e-202
RFC5	DR1	1.02794	1.03e-88
SYCE1	DR1	1.02536	1.37e-37
RPUSD3	DR1	1.02499	5.92e-121
NEK3	DR1	1.02405	8.01e-80
GINS2	DR1	1.02233	9.94e-88
CNIH4	DR1	1.02203	1.21e-215
ADIPOR1	DR1	1.02176	4.72e-137
CDKN2AIPNL	DR1	1.01281	1.37e-157
FAM162B	DR1	1.01229	3.02e-52
E2F4	DR1	1.00876	5.62e-111
DCK	DR1	1.00623	9.13e-64
PABPC1	DR1	1.00521	8.76e-206
PSMG1	DR1	1.00513	7.7e-117
MRPS2	DR1	1.00411	2.03e-156
MRPS18A	DR1	1.00332	1.43e-163
SESN1	DR1	1.00191	4.46e-60
KRBOX1	DR1	0.99754	2.72e-37
POLR2D	DR1	0.996771	2.07e-108
OSGIN2	DR1	0.996303	2e-38
NUMB	DR1	0.992941	3.55e-48
PUS1	DR1	0.99034	4.05e-92
GSTA4	DR1	0.990245	5.74e-85
SYNGR2	DR1	0.988259	6.3e-88
RAB5A	DR1	0.988257	5.31e-105
ETF1	DR1	0.986925	9.73e-163
CIAPIN1	DR1	0.986098	4.61e-144
ZNF146	DR1	0.98518	7.43e-92
ATG3	DR1	0.9827	1.4e-125
TCEA1	DR1	0.982087	3.06e-170
SLC39A1	DR1	0.980996	1.78e-169
ADRM1	DR1	0.97909	6.52e-231
MRPS23	DR1	0.97885	9.82e-185
DDX56	DR1	0.976383	2.1e-122
ISCA1	DR1	0.97435	5.64e-137
PLEKHA5	DR1	0.9742	2.2e-87
GRWD1	DR1	0.971815	6.69e-122
IFRD1	DR1	0.969889	1.68e-75
TIMM50	DR1	0.966528	5.78e-165
SNRNP40	DR1	0.965536	1.14e-143
PITPNB	DR1	0.965031	1e-107
RAP2C	DR1	0.964399	1.29e-64
ZWINT	DR1	0.963098	4.08e-116
SPIN4	DR1	0.961383	1.49e-48
PARVB	DR1	0.961073	3.77e-86
TXNDC12	DR1	0.960034	9.52e-159
UTP4	DR1	0.959983	2.32e-96
ESRRA	DR1	0.959153	8.58e-73
RBM14	DR1	0.9583	6.5e-105
MRPL49	DR1	0.956464	6.43e-111
LRRC47	DR1	0.956052	2.16e-106
NIP7	DR1	0.953374	9.04e-111
SF3A2	DR1	0.950184	1.28e-107
CLN6	DR1	0.949964	2.99e-87
BOLA3	DR1	0.945532	9.96e-159
CDC20	DR1	0.945355	1.23e-88
TSN	DR1	0.943557	1.55e-130
MRPL37	DR1	0.942625	1.91e-180
F2RL1	DR1	0.942319	1.8e-47
ADSL	DR1	0.939866	6.35e-156
MCRS1	DR1	0.93682	9.82e-123
MRTO4	DR1	0.935933	9.58e-151
CENPW	DR1	0.935813	1.59e-151
RBMX	DR1	0.934497	2.66e-201
MAPK1IP1L	DR1	0.934173	3.3e-141
ANKRD40	DR1	0.933644	6.37e-54
UBA2	DR1	0.93184	1.05e-121
EIF2S1	DR1	0.93061	3.87e-152
TFAM	DR1	0.93009	1.99e-143
DLD	DR1	0.925962	6.76e-104
CYCS	DR1	0.925413	1.49e-199
RRP1	DR1	0.925328	6.06e-102
FUCA1	DR1	0.925212	5.17e-61
PTBP1	DR1	0.924239	5.36e-143
PSMG3	DR1	0.922778	3.47e-123
ALYREF	DR1	0.921739	5.38e-123
GCHFR	DR1	0.921287	1.18e-94
VARS	DR1	0.9212	7.31e-92
MRPL21	DR1	0.920256	4.85e-191
TIMM22	DR1	0.919777	7.27e-146
MYADM	DR1	0.918985	9.2e-61
RNPS1	DR1	0.917425	6.88e-165
BRIX1	DR1	0.916414	2.41e-118
MFSD14A	DR1	0.91615	4.49e-72
LPCAT4	DR1	0.915857	9.62e-48
MAGOH	DR1	0.915439	3.12e-166
SC5D	DR1	0.915356	5.14e-76
NCAPG	DR1	0.913963	1.26e-61
MTIF2	DR1	0.911879	3.59e-90
PSMD3	DR1	0.910865	1.3e-169
EXOSC3	DR1	0.909331	2.34e-129
NDUFAF4	DR1	0.908886	3.68e-116
GOLM1	DR1	0.908136	1.16e-65
RPUSD1	DR1	0.907611	2.05e-88
PSPC1	DR1	0.907364	4.13e-105
LYAR	DR1	0.906974	2.77e-105
YARS	DR1	0.906533	8.02e-132
MRPL12	DR1	0.904635	2.55e-191
PPT1	DR1	0.903831	2.81e-119
G3BP2	DR1	0.902422	7.09e-103
PNRC2	DR1	0.899407	1.19e-111
COX5A	DR1	0.898683	1.2e-221
PHB2	DR1	0.898093	1.6e-191
RNF26	DR1	0.897683	4.8e-80
RTKN2	DR1	0.895745	1.64e-65
UMPS	DR1	0.895253	1.18e-92
CS	DR1	0.89497	1.71e-105
TIMM10	DR1	0.89361	4.32e-148
RP11-294J22.6	DR1	0.893398	2.91e-28
METTL13	DR1	0.892505	1.54e-78
MRPS25	DR1	0.891966	2.5e-132
PTTG1	DR1	0.890269	5.38e-113
VPS4A	DR1	0.890215	6.78e-110
PAIP1	DR1	0.888512	2.28e-122
RANBP1	DR1	0.885207	9.67e-199
KIAA1524	DR1	0.885036	2.56e-63
PRPF19	DR1	0.884918	1.33e-93
SF3B4	DR1	0.884699	7.92e-124
C1QBP	DR1	0.882882	7.08e-221
FTSJ2	DR1	0.882473	2.65e-109
BYSL	DR1	0.881084	6.61e-86
UBE2M	DR1	0.880486	2.65e-125
RPP30	DR1	0.88036	1.21e-118
PDCD2	DR1	0.880144	5.24e-140
CHST12	DR1	0.880028	1.64e-71
RP5-832C2.5	DR1	0.878691	1.42e-36
PRDX1	DR1	0.87729	9.89e-244
LTV1	DR1	0.876029	7.67e-95
EIF4EBP1	DR1	0.874683	8.55e-126
PSMC3IP	DR1	0.874126	2.58e-69
HSPA14	DR1	0.87212	4.18e-84
CTPS1	DR1	0.870004	4.52e-78
PLIN2	DR1	0.86971	1.71e-79
EXOSC8	DR1	0.869119	4.94e-119
BLMH	DR1	0.868986	1.37e-79
KXD1	DR1	0.86768	6.87e-144
RBMS1	DR1	0.86285	9.23e-82
ACSL3	DR1	0.86205	7.61e-66
GMPS	DR1	0.860994	4.36e-99
HSD17B12	DR1	0.860491	1.48e-116
GNL3	DR1	0.860377	1.12e-130
UBL4A	DR1	0.858495	6.8e-65
PPP2CA	DR1	0.856909	8.08e-140
KARS	DR1	0.855472	5.09e-138
SCO1	DR1	0.854967	1.54e-91
C20orf24	DR1	0.852819	5.68e-157
SURF2	DR1	0.852077	1.3e-106
NDUFV1	DR1	0.850456	1.97e-172
SRSF3	DR1	0.849923	4.06e-207
FUBP1	DR1	0.848973	2.53e-102
SPTSSA	DR1	0.848259	2.86e-119
ASF1A	DR1	0.848188	1.61e-90
CERS2	DR1	0.848039	3.91e-65
SLC25A5	DR1	0.847799	1.19e-184
EIF4A1	DR1	0.846957	1.2e-162
MRPS7	DR1	0.84614	2.61e-183
EGLN2	DR1	0.846029	1.84e-109
YBX3	DR1	0.843466	2.18e-147
DENR	DR1	0.842223	8.34e-152
TYMS	DR1	0.842154	1.43e-109
ATP1B3	DR1	0.840823	1.9e-168
TRIAP1	DR1	0.840465	1.26e-129
PSMC6	DR1	0.837926	3.15e-140
MOB4	DR1	0.837741	1.37e-96
EBPL	DR1	0.836408	4.76e-134
CDC45	DR1	0.835092	2.55e-62
PES1	DR1	0.835057	1.84e-91
MT1E	DR1	0.830453	2.92e-66
C14orf80	DR1	0.829532	5.59e-60
GCSH	DR1	0.82905	3.66e-162
PUF60	DR1	0.828308	6.28e-169
ZMYND19	DR1	0.828264	4.23e-54
NDUFA9	DR1	0.828114	1.84e-137
DCUN1D5	DR1	0.825981	4.96e-135
IPO5	DR1	0.824882	2.05e-88
MRPL4	DR1	0.822927	4.18e-142
TCHP	DR1	0.821972	3.64e-47
NFIB	DR1	0.819879	8.09e-33
TXNL4A	DR1	0.819495	1.23e-148
CHMP1A	DR1	0.817738	3.2e-87
MCMBP	DR1	0.81648	9.34e-72
SF1	DR1	0.816221	8.56e-132
SSRP1	DR1	0.816074	6.08e-146
BCL2L1	DR1	0.815286	1.84e-57
VDAC2	DR1	0.814561	1.98e-218
RPIA	DR1	0.814053	1.83e-65
SNHG15	DR1	0.81385	1.33e-81
TOMM22	DR1	0.812734	1.33e-197
HMGB2	DR1	0.812203	1.29e-90
UBE2D2	DR1	0.811036	9.46e-169
CDC42SE1	DR1	0.810998	9.46e-55
EXOSC4	DR1	0.806857	2.04e-105
DIMT1	DR1	0.80668	3.12e-69
PSMC4	DR1	0.806161	3.52e-128
TSR1	DR1	0.806068	3.09e-77
SLC25A33	DR1	0.804734	1.08e-61
NAA50	DR1	0.804123	2.94e-85
HADH	DR1	0.802348	3.31e-83
C20orf27	DR1	0.79671	1.68e-124
SDHD	DR1	0.796665	6.59e-109
CHCHD3	DR1	0.796144	1.76e-119
SRSF10	DR1	0.795887	2.43e-151
URM1	DR1	0.793765	6.42e-104
FAM49B	DR1	0.793545	2.76e-95
SRM	DR1	0.793441	7.33e-138
EMC6	DR1	0.792171	6.27e-156
CASP6	DR1	0.791099	6.39e-50
FAM207A	DR1	0.790426	1.1e-114
RRS1	DR1	0.785952	7.71e-72
ACVR1	DR1	0.784494	2.8e-47
HAT1	DR1	0.783814	4.05e-80
TBPL1	DR1	0.783561	5.74e-83
RRP36	DR1	0.783193	1.95e-93
ZPR1	DR1	0.779693	1.42e-85
PPA1	DR1	0.77863	5.9e-154
MAT2A	DR1	0.777893	1.4e-98
TBCA	DR1	0.777128	2.91e-214
MRPS26	DR1	0.775797	1.66e-126
POLR2C	DR1	0.775418	3.01e-114
EXOSC2	DR1	0.773848	5.42e-68
SNCA	DR1	0.771171	5.62e-43
CCT6A	DR1	0.770985	6.54e-161
EIF4H	DR1	0.769195	1.87e-129
SFT2D1	DR1	0.76445	4.77e-133
ATAD3A	DR1	0.764001	1.51e-67
TPRKB	DR1	0.763852	2.73e-115
MRPS12	DR1	0.763683	7.74e-133
E2F5	DR1	0.762868	1.6e-37
MRPL3	DR1	0.762492	3.65e-141
PSMD6	DR1	0.760377	1.37e-112
C5orf30	DR1	0.760089	5.39e-36
MRPL16	DR1	0.759529	3.95e-97
NOB1	DR1	0.75904	1.02e-84
GNL2	DR1	0.758191	5.67e-72
IFNGR1	DR1	0.757485	2.37e-51
CCNG1	DR1	0.756258	6.6e-104
STIP1	DR1	0.755289	1.39e-120
POLR2E	DR1	0.754241	1.37e-146
TMEM41A	DR1	0.753733	1.97e-54
PLEKHJ1	DR1	0.75305	1.41e-117
CCT5	DR1	0.751305	2.43e-144
RAN	DR1	0.750556	3.94e-222
GTF2A2	DR1	0.750457	9.36e-158
POLR3K	DR1	0.749472	1.52e-95
TUFM	DR1	0.748388	3.07e-194
AURKA	DR1	0.748338	3.67e-54
SRSF6	DR1	0.74759	8.88e-83
UBE2N	DR1	0.747423	1.3e-155
VPS25	DR1	0.747214	1.01e-120
RRP12	DR1	0.744881	1.34e-39
EXOSC7	DR1	0.742731	6.17e-116
UBE2I	DR1	0.741678	2.8e-180
STRAP	DR1	0.740531	6.95e-155
USP14	DR1	0.738829	2.08e-78
CCT8	DR1	0.738077	3.76e-140
RUVBL2	DR1	0.73716	8.92e-126
GNG5	DR1	0.73713	1.81e-162
RRP7A	DR1	0.736543	1.37e-101
HDDC2	DR1	0.736212	2.22e-110
MRPL42	DR1	0.73434	9.59e-113
FARSA	DR1	0.73192	2.82e-81
GARS	DR1	0.731574	3.22e-84
DNAJC2	DR1	0.731331	7.83e-90
SLC1A5	DR1	0.729439	7.07e-74
EBNA1BP2	DR1	0.72927	7.64e-110
PDRG1	DR1	0.727566	5.44e-65
HARS	DR1	0.726618	1.82e-89
STOM	DR1	0.726343	2.04e-34
MDH2	DR1	0.726004	2.54e-178
AASDHPPT	DR1	0.720144	2.39e-57
SLC25A11	DR1	0.718496	1.38e-102
DHRS7	DR1	0.716586	8.3e-57
RHEB	DR1	0.715107	2.76e-137
C1orf109	DR1	0.711312	1.71e-45
EIF4E	DR1	0.709503	1.2e-108
ARPC5L	DR1	0.709176	2.6e-126
HES2	DR1	0.708913	6.4e-19
COPS8	DR1	0.707892	2.08e-104
SFPQ	DR1	0.707725	1.01e-106
RPF2	DR1	0.704902	2.58e-73
POLR1C	DR1	0.703646	3.28e-41
H1FX	DR1	0.703221	3.59e-57
PRMT5	DR1	0.701904	1.33e-63
ELOF1	DR1	0.701815	1.62e-107
FARSB	DR1	0.698772	1.59e-57
UTP14A	DR1	0.698455	3.75e-46
PNMA1	DR1	0.694991	1.9e-45
RNF11	DR1	0.689826	5.69e-48
RBM7	DR1	0.689486	3.25e-57
TROAP	DR1	0.689355	2.22e-51
RBM8A	DR1	0.688123	8.47e-166
MRPS18C	DR1	0.686992	3.09e-129
AHSA1	DR1	0.685276	7.65e-95
RSL1D1	DR1	0.683674	1.84e-113
SNRPC	DR1	0.682844	1.33e-114
TRMT6	DR1	0.681629	5.41e-50
TMEM33	DR1	0.68044	5.32e-57
PDK1	DR1	0.680084	1.1e-33
STOML2	DR1	0.679785	4.35e-142
AAMP	DR1	0.679287	1.47e-92
MID1	DR1	0.678247	8.29e-38
TUBB	DR1	0.678156	3.52e-162
LLPH	DR1	0.675421	3.39e-62
CCT7	DR1	0.674007	6.11e-145
WBSCR22	DR1	0.67325	2.11e-94
RTCB	DR1	0.67203	6.8e-99
NOL7	DR1	0.67087	7.11e-130
CEBPZOS	DR1	0.668629	1.11e-63
AK6	DR1	0.667532	1.42e-57
CDC34	DR1	0.664909	7.63e-56
UQCC3	DR1	0.66258	5.17e-87
TMA16	DR1	0.662233	5.19e-86
DDX5	DR1	0.661621	4.06e-137
RNASEH2B	DR1	0.66113	1.99e-49
CENPK	DR1	0.660527	1.72e-53
WTAP	DR1	0.659563	1.22e-79
U2SURP	DR1	0.655824	5.29e-91
IMPDH2	DR1	0.655717	4e-110
CNBP	DR1	0.655297	2.85e-135
GLUL	DR1	0.655159	1.6e-37
SMIM10L1	DR1	0.65409	3.9e-67
DNAJA1	DR1	0.653923	6.73e-114
SRD5A3	DR1	0.652604	3.86e-43
C8orf59	DR1	0.650698	2.76e-115
SNX2	DR1	0.650559	3.44e-65
VDAC1	DR1	0.649928	5.77e-129
SNRPB	DR1	0.64932	6.74e-129
GLRX3	DR1	0.648557	2.66e-114
YWHAQ	DR1	0.647094	3.54e-153
CYC1	DR1	0.646984	1.85e-127
EEF2	DR1	0.646095	2.92e-147
LSM14A	DR1	0.645644	1.26e-71
NMD3	DR1	0.642668	8.72e-36
SNRNP70	DR1	0.639872	1.12e-125
GLRX5	DR1	0.636784	4.45e-88
RP11-12G12.7	DR1	0.636772	2.11e-38
GSPT2	DR1	0.635567	2.57e-29
DDA1	DR1	0.635183	3.36e-61
ERH	DR1	0.633782	3.22e-168
ATP5G3	DR1	0.633762	6.49e-200
LSM5	DR1	0.631035	1.24e-123
H2AFZ	DR1	0.629418	2.03e-114
PPIH	DR1	0.627053	3.28e-69
PPP1R14B	DR1	0.626409	1.72e-94
WBP4	DR1	0.625882	3.84e-44
LSM2	DR1	0.625134	2.15e-97
RBM17	DR1	0.624992	3.77e-98
PHF23	DR1	0.624944	3.21e-55
MAK16	DR1	0.62299	4.64e-42
PSMD13	DR1	0.6228	4.42e-97
ATP1A1	DR1	0.620088	4.19e-52
SRP19	DR1	0.620047	5.43e-82
H2AFX	DR1	0.620046	1.4e-54
EIF6	DR1	0.619431	6.4e-136
MRPL20	DR1	0.618441	3.39e-145
SRRT	DR1	0.617999	1.4e-60
PRPF38B	DR1	0.61723	3.75e-69
GLO1	DR1	0.614566	4.9e-93
TCEB1	DR1	0.611907	2.04e-152
C1orf52	DR1	0.610686	3.73e-50
PSMC2	DR1	0.60755	2.77e-73
HNRNPK	DR1	0.607235	8.91e-136
ESD	DR1	0.605978	2.71e-80
LRPAP1	DR1	0.60424	1.33e-77
CARS	DR1	0.603781	1.12e-43
LUC7L	DR1	0.603391	3.55e-58
ECHDC1	DR1	0.602468	4.58e-63
EIF2S3	DR1	0.601355	4.15e-71
VCP	DR1	0.601116	3.32e-96
FBXW7	DR1	0.597931	6.46e-34
EWSR1	DR1	0.596653	1.86e-84
HNRNPDL	DR1	0.596182	2.19e-122
TOP1	DR1	0.591331	9.57e-81
CDK4	DR1	0.590326	4.79e-95
SEC11C	DR1	0.585707	2.26e-46
SRI	DR1	0.585706	7.77e-102
GDI2	DR1	0.584711	1.16e-109
PRDX3	DR1	0.584051	2.75e-95
BUB3	DR1	0.58003	3.28e-64
NDUFB9	DR1	0.576683	1.04e-139
SAFB	DR1	0.572581	7.38e-50
EIF5	DR1	0.564654	9.21e-91
CSDE1	DR1	0.563183	2.8e-89
RIOK1	DR1	0.55476	6.42e-34
LSM3	DR1	0.551564	1.32e-119
DDX10	DR1	0.55061	5.42e-24
FOXO3	DR1	0.550362	2.03e-27
UBTF	DR1	0.54608	7.64e-37
MKKS	DR1	0.543189	7.88e-83
PSMD8	DR1	0.543176	1.89e-126
ATP6V0B	DR1	0.541972	1.35e-89
PRELID1	DR1	0.541966	4.33e-115
CLPX	DR1	0.541916	5.42e-31
RPL4	DR1	0.528776	1.29e-139
FNBP4	DR1	0.524492	1.04e-34
TM9SF3	DR1	0.523747	6.11e-40
AURKAIP1	DR1	0.518741	9.86e-116
FH	DR1	0.518054	3e-40
CNIH1	DR1	0.51506	5.52e-52
TLK1	DR1	0.511099	3.64e-23
TUBG1	DR1	0.510057	1.92e-48
PGP	DR1	0.501864	1.21e-50
SAFB2	DR1	0.499557	1.41e-38
EIF3E	DR1	0.49659	1.2e-119
TRAFD1	DR1	0.487648	4.68e-16
TRMT112	DR1	0.486774	3.39e-114
BCLAF1	DR1	0.485096	2.21e-46
KHDRBS1	DR1	0.483403	3.96e-81
EMC7	DR1	0.482185	1.43e-55
ANLN	DR1	0.475261	2.08e-34
CYSTM1	DR1	0.46981	2.82e-38
FAM133B	DR1	0.461693	4.94e-40
RUNDC1	DR1	0.461272	3.74e-22
DTYMK	DR1	0.458816	7.66e-55
PTP4A2	DR1	0.455292	1.97e-51
REEP5	DR1	0.455119	1.84e-57
SARAF	DR1	0.454594	1.96e-45
TPI1	DR1	0.454224	3.58e-100
DHFR	DR1	0.442421	5.68e-31
EIF3D	DR1	0.441302	2.96e-59
HAUS3	DR1	0.441246	9.1e-17
ANXA7	DR1	0.43149	5.29e-39
YBX1	DR1	0.428478	1.06e-136
ZNF22	DR1	0.421905	3.74e-34
RPL26	DR1	0.416909	7.54e-129
PPP1R10	DR1	0.407408	1.95e-19
SIVA1	DR1	0.403329	3.97e-55
GSPT1	DR1	0.397207	5.36e-43
SHCBP1	DR1	0.396985	5.09e-29
EIF4G2	DR1	0.350266	7.36e-44
CKAP2L	DR1	0.334452	7.63e-18
AP000692.10	DR1	0.306847	5.73e-11
CAPZA2	DR1	0.297775	1.61e-24
RP11-84G21.1	DR1	0.250177	8.04e-07
CSH1	DR2	4.54953	0
ACTA1	DR2	4.38232	0
CSH2	DR2	4.03861	0
NODAL	DR2	3.59048	0
NRK	DR2	3.49386	0
PLBD1	DR2	3.17634	0
NLRP7	DR2	3.10495	0
LEFTY1	DR2	2.97013	0
FGF4	DR2	2.9429	0
DPPA3	DR2	2.89602	0
GRB7	DR2	2.8917	0
GH2	DR2	2.88883	0
TJP3	DR2	2.83931	0
LEFTY2	DR2	2.83878	0
PPP1R1B	DR2	2.82645	0
UTF1	DR2	2.826	0
EPCAM	DR2	2.82181	0
RP11-277P12.10	DR2	2.80467	0
KHDC3L	DR2	2.78179	0
NGFR	DR2	2.76892	0
CERS4	DR2	2.76725	0
GDF3	DR2	2.72187	0
PIM1	DR2	2.69859	0
RP11-598D14.1	DR2	2.65616	1.49e-185
ZFP42	DR2	2.65114	0
FGF19	DR2	2.6458	0
POU5F1B	DR2	2.63603	0
FXYD3	DR2	2.62877	0
CR1L	DR2	2.60806	0
ABHD12B	DR2	2.5865	0
VSNL1	DR2	2.57656	0
HPGD	DR2	2.55804	0
POU5F1	DR2	2.5016	0
FGF8	DR2	2.50031	0
KREMEN2	DR2	2.49583	0
CA4	DR2	2.49467	0
TLE2	DR2	2.4655	0
LYPD1	DR2	2.42993	0
CD200	DR2	2.42857	0
NANOG	DR2	2.42844	0
COL9A3	DR2	2.42682	0
ARHGEF16	DR2	2.42	0
GPRC5A	DR2	2.40285	6.61e-287
RPRM	DR2	2.40119	0
GAL	DR2	2.39066	0
NUDT15	DR2	2.38495	0
CLDN4	DR2	2.37703	0
LINC01356	DR2	2.36385	0
BAIAP2L2	DR2	2.35947	0
CLDN6	DR2	2.35143	0
SPINT2	DR2	2.35136	0
RP11-69I8.2	DR2	2.34227	0
PIFO	DR2	2.32999	0
DPPA2	DR2	2.31622	0
SPINT1	DR2	2.30968	0
RAB25	DR2	2.29208	0
ZNF600	DR2	2.28997	0
ZFP57	DR2	2.28902	0
RTP1	DR2	2.28433	0
WNT3	DR2	2.28312	0
TIMP4	DR2	2.27511	0
DUSP5	DR2	2.27413	0
KLRG2	DR2	2.26975	0
RBPMS2	DR2	2.25324	0
FGFR4	DR2	2.2513	0
FAM9C	DR2	2.2505	6.34e-275
IL32	DR2	2.24344	0
TDGF1	DR2	2.24288	0
DRAXIN	DR2	2.24165	0
EPHA1	DR2	2.22838	0
HEY2	DR2	2.22338	0
HAS3	DR2	2.21722	0
FGF18	DR2	2.21691	0
MUC3A	DR2	2.21557	0
NMU	DR2	2.20929	0
CLDN7	DR2	2.2037	0
RGS16	DR2	2.20212	0
NLRP2	DR2	2.19642	0
ABCG2	DR2	2.19284	0
VENTX	DR2	2.19233	0
CYP2S1	DR2	2.18278	0
ZSCAN10	DR2	2.17914	0
SOX15	DR2	2.1682	0
FOXH1	DR2	2.16335	0
HPDL	DR2	2.16322	0
OVOL2	DR2	2.15256	0
MYCN	DR2	2.14545	0
SPINK2	DR2	2.14443	0
PPM1N	DR2	2.14136	0
GPR27	DR2	2.13981	0
RASL11B	DR2	2.12494	0
FGF13	DR2	2.11116	0
TPD52	DR2	2.09629	0
SOX3	DR2	2.08971	0
PRSS8	DR2	2.07021	0
MAP4K1	DR2	2.0615	0
CTC-526N19.1	DR2	2.06062	0
FOXD3	DR2	2.0568	0
MT1M	DR2	2.04767	0
LINC01508	DR2	2.04256	0
TRIML2	DR2	2.03819	0
RP11-149I23.3	DR2	2.03815	9.36e-97
LMNB1	DR2	2.03537	0
ALPL	DR2	2.0282	0
FABP7	DR2	2.00836	0
SCGB3A2	DR2	2.00395	0
NECAB1	DR2	1.99499	0
CRISPLD1	DR2	1.99226	0
PCDH1	DR2	1.98209	0
PDGFA	DR2	1.97758	0
TUNAR	DR2	1.9774	0
GPRC5B	DR2	1.97692	0
GCNT2	DR2	1.97254	0
SH2D3A	DR2	1.97207	0
BCAM	DR2	1.96856	0
BSPRY	DR2	1.96549	0
LSR	DR2	1.9623	0
DIAPH2	DR2	1.96215	0
CXADR	DR2	1.95432	0
FOXA3	DR2	1.95231	0
LINC-ROR	DR2	1.92849	0
PKDCC	DR2	1.92661	6.98e-252
CBLC	DR2	1.92492	0
SFN	DR2	1.92438	0
AIF1L	DR2	1.92423	0
TUBB2B	DR2	1.92215	0
CCL26	DR2	1.91986	0
KRT18	DR2	1.91303	0
PLP1	DR2	1.91146	0
PPP1R3B	DR2	1.90882	0
CRB3	DR2	1.90594	0
ELF3	DR2	1.90099	0
RASGEF1A	DR2	1.89551	0
MRS2	DR2	1.89078	0
IL23A	DR2	1.8765	0
DTWD2	DR2	1.87122	0
TCL1B	DR2	1.86927	0
N4BP3	DR2	1.86754	0
GBX2	DR2	1.86584	0
CCDC169	DR2	1.86558	0
SOCS1	DR2	1.86456	0
UNC13D	DR2	1.85498	0
NNAT	DR2	1.84607	2.51e-259
PTCH1	DR2	1.83775	0
NLRP12	DR2	1.82894	0
GPRC5C	DR2	1.82597	0
RP3-399L15.3	DR2	1.81547	0
CCND2	DR2	1.81496	0
CTC-254B4.1	DR2	1.80541	0
APOE	DR2	1.80384	0
RENBP	DR2	1.79874	0
BIK	DR2	1.79744	0
DACT1	DR2	1.78426	0
CA14	DR2	1.78411	0
ENO3	DR2	1.78304	0
SLC2A1	DR2	1.78297	0
AC144450.2	DR2	1.7778	0
PSAT1	DR2	1.76815	0
OCLN	DR2	1.75811	0
SPOCK2	DR2	1.74874	0
PIM2	DR2	1.74503	0
TMEM37	DR2	1.73846	0
GPX3	DR2	1.73499	0
ERBB3	DR2	1.73273	0
CTH	DR2	1.73222	0
CTD-2501M5.1	DR2	1.73029	1.62e-123
CCNA1	DR2	1.72842	0
SFRP2	DR2	1.7237	0
CPVL	DR2	1.72143	0
PPP1R17	DR2	1.72109	0
B3GNT7	DR2	1.71384	0
F11R	DR2	1.71098	0
ERVMER34-1	DR2	1.70501	0
REC8	DR2	1.70004	0
DLL3	DR2	1.68859	0
CASP3	DR2	1.68823	0
UNG	DR2	1.6848	0
RBM38	DR2	1.68045	0
SUCLA2	DR2	1.67978	0
MYBL2	DR2	1.67827	0
HEBP2	DR2	1.67629	0
MT1X	DR2	1.67516	0
GPT2	DR2	1.67233	0
CDH3	DR2	1.65934	0
DCLK1	DR2	1.65795	0
STON2	DR2	1.65714	1.29e-303
EZR	DR2	1.65235	0
GALNT7	DR2	1.63377	0
ZNF486	DR2	1.6323	0
RND2	DR2	1.63078	0
PTCHD1	DR2	1.62869	0
INPP5J	DR2	1.62818	0
SEPHS1	DR2	1.62661	0
LPAR2	DR2	1.62252	0
VGF	DR2	1.61564	0
NSG1	DR2	1.61288	0
LINC00937	DR2	1.60871	2.56e-304
ZNF296	DR2	1.60363	0
TET1	DR2	1.5983	0
MAD2L2	DR2	1.59599	0
LNX1	DR2	1.59494	2.8e-277
DBNDD1	DR2	1.58901	0
ZNF682	DR2	1.57933	0
LDHD	DR2	1.57278	0
KCNS3	DR2	1.57251	0
JADE2	DR2	1.57056	0
MCM5	DR2	1.56619	0
TUBB2A	DR2	1.56258	0
CKB	DR2	1.56194	0
NETO2	DR2	1.55343	0
ZNF93	DR2	1.54367	0
RASL10A	DR2	1.53876	1.47e-232
KCTD6	DR2	1.53646	4.67e-284
PSRC1	DR2	1.53381	0
ETV5	DR2	1.53149	0
ALDH3A2	DR2	1.52452	0
HIST1H2BH	DR2	1.51953	0
PKP3	DR2	1.51008	6.09e-284
LINC00371	DR2	1.50731	2.94e-304
HMGB3	DR2	1.50643	0
LINC00665	DR2	1.50547	0
SHMT1	DR2	1.48672	0
ZSCAN2	DR2	1.4849	0
LINGO1	DR2	1.46812	0
PDHB	DR2	1.46461	0
SLC43A2	DR2	1.46448	4.79e-299
SLC3A2	DR2	1.46333	0
LITAF	DR2	1.46158	0
2021-03-01	DR2	1.46008	0
HK1	DR2	1.44996	0
ARRB1	DR2	1.44193	0
PRIM1	DR2	1.44168	0
PCSK5	DR2	1.43958	1.1e-259
RNF19A	DR2	1.43948	1.67e-213
UBE2C	DR2	1.43472	0
DAB1	DR2	1.4221	0
SULT1A1	DR2	1.41865	7.31e-260
ITGB5	DR2	1.41693	0
STC2	DR2	1.41486	1.42e-291
RCOR2	DR2	1.41046	0
DSCC1	DR2	1.40855	0
CDA	DR2	1.40706	0
MYC	DR2	1.40001	0
ACP5	DR2	1.3996	0
GABARAPL1	DR2	1.39807	0
SUSD3	DR2	1.39657	4.55e-259
OIP5	DR2	1.39111	0
GRB14	DR2	1.39014	1.86e-290
AZIN1	DR2	1.3828	0
SLC5A6	DR2	1.37707	0
SKA3	DR2	1.37141	0
IDH1	DR2	1.3698	0
FAM46B	DR2	1.36782	0
ISYNA1	DR2	1.36593	0
MCM7	DR2	1.36257	0
MAN1C1	DR2	1.35525	3.49e-225
SH3BGR	DR2	1.35173	0
SLC29A1	DR2	1.34539	0
CD52	DR2	1.34534	7.41e-252
RHOU	DR2	1.34017	1.28e-173
PMAIP1	DR2	1.32783	0
RCC2	DR2	1.32516	0
AURKC	DR2	1.31449	3.43e-249
BBS9	DR2	1.31292	5.76e-215
TMEM191B	DR2	1.30515	8.1e-275
SIRT1	DR2	1.29981	2.47e-307
CABYR	DR2	1.29787	1e-248
LAMC2	DR2	1.29584	7.52e-170
SEPP1	DR2	1.2956	2.18e-293
RAB20	DR2	1.2938	3.33e-244
CORO1A	DR2	1.29273	2.1e-293
STXBP2	DR2	1.28881	0
FAM83D	DR2	1.28195	0
DPH2	DR2	1.27788	0
ABRACL	DR2	1.27688	0
PITPNC1	DR2	1.26898	0
EPHX1	DR2	1.26788	0
DEPDC1B	DR2	1.25669	5.5e-260
HMGA1	DR2	1.25493	0
PTP4A3	DR2	1.24432	1.66e-232
TLCD1	DR2	1.23544	0
NMI	DR2	1.22526	0
CBFA2T2	DR2	1.2241	1.91e-205
CHEK2	DR2	1.22362	0
SPG20	DR2	1.20924	0
HORMAD1	DR2	1.20775	2.06e-143
GJA1	DR2	1.2074	0
MB21D1	DR2	1.20696	1.15e-240
PDLIM1	DR2	1.19989	0
TUBA4A	DR2	1.19828	9.81e-306
DERL3	DR2	1.1967	8.33e-226
CEP135	DR2	1.19453	3.95e-219
DDR1	DR2	1.19399	4.04e-253
RHOF	DR2	1.186	3.49e-286
DHRS3	DR2	1.18085	5.25e-219
MID1IP1	DR2	1.17904	0
RMI2	DR2	1.17699	0
ASNS	DR2	1.16784	0
CDC25C	DR2	1.16669	2.3e-271
FKBP4	DR2	1.16624	0
PHGDH	DR2	1.15836	0
CENPU	DR2	1.15368	0
MYLPF	DR2	1.15197	8.8e-107
PKMYT1	DR2	1.15034	0
LIMD2	DR2	1.14849	0
TKT	DR2	1.14351	0
CD7	DR2	1.13693	3.56e-143
PDCD2L	DR2	1.136	0
CENPA	DR2	1.1334	1.99e-307
VASP	DR2	1.132	0
TTK	DR2	1.13176	2.37e-236
KPNA2	DR2	1.13055	0
HN1L	DR2	1.12751	0
IL17RD	DR2	1.12301	1.18e-215
GID8	DR2	1.12267	0
CCNB1	DR2	1.12196	0
PYCR2	DR2	1.12182	0
CD9	DR2	1.12038	0
DDX43	DR2	1.12038	4.45e-89
SLC7A5	DR2	1.11781	0
IMPA2	DR2	1.11769	0
RASSF7	DR2	1.11738	1.76e-296
PRPS1	DR2	1.11694	0
TRIM28	DR2	1.11419	0
MARCKSL1	DR2	1.11212	0
UBE2G1	DR2	1.11091	0
LDLRAP1	DR2	1.10861	2.06e-178
MCM2	DR2	1.10783	8.59e-272
CDC6	DR2	1.10729	0
DTNA	DR2	1.10717	8.36e-134
DAZAP1	DR2	1.10482	0
COA7	DR2	1.103	0
COCH	DR2	1.10224	5.19e-135
CDCA5	DR2	1.1001	0
PGM1	DR2	1.09735	2.63e-259
CDT1	DR2	1.09476	0
NUP35	DR2	1.09445	1.34e-305
HSPA9	DR2	1.08909	0
REST	DR2	1.08827	0
RP11-422P24.12	DR2	1.08697	4.32e-121
RMND5B	DR2	1.08106	0
GRAMD1A	DR2	1.0778	0
RPP25	DR2	1.07769	5.38e-279
C18orf21	DR2	1.07753	0
RND1	DR2	1.07629	7.99e-113
AARS	DR2	1.07195	0
EXOSC5	DR2	1.07127	0
RIMKLB	DR2	1.06917	1.63e-254
RTN3	DR2	1.06796	0
CECR5	DR2	1.06419	0
LRRC61	DR2	1.06339	9.04e-274
AURKB	DR2	1.06199	0
ATIC	DR2	1.06106	0
C16orf59	DR2	1.05779	4.92e-274
MPV17L2	DR2	1.05315	0
KIF23	DR2	1.05198	1.86e-274
IRF2BPL	DR2	1.0489	8.11e-250
RRAS2	DR2	1.04671	0
RNF167	DR2	1.0438	0
RBPMS	DR2	1.04339	0
ESCO2	DR2	1.04155	4.12e-232
NR2F6	DR2	1.03641	0
KCMF1	DR2	1.03174	0
ENSA	DR2	1.02904	0
MCM6	DR2	1.01877	1.04e-295
STMN3	DR2	1.01202	1.01e-228
DAG1	DR2	1.00972	4.66e-292
TMEM160	DR2	1.00875	0
KLHL7	DR2	1.00755	0
SPRY4	DR2	1.00748	2.27e-196
ENOPH1	DR2	1.007	0
PXN-AS1	DR2	1.00581	2.96e-211
CAAP1	DR2	1.00512	3.93e-241
SPSB4	DR2	1.00324	5.9e-111
TPST2	DR2	1.00029	7e-304
MTHFD2	DR2	0.99865	0
TACC3	DR2	0.998172	0
PLEKHF1	DR2	0.998116	2.54e-156
LINC00467	DR2	0.995485	3.51e-140
MCM10	DR2	0.994862	8.95e-279
YEATS4	DR2	0.990945	0
PCK2	DR2	0.990015	1.1e-162
NUP54	DR2	0.987108	3.61e-255
CCPG1	DR2	0.980179	5.15e-168
MIIP	DR2	0.977534	0
HJURP	DR2	0.97726	2.73e-214
CDCA3	DR2	0.97709	6.36e-299
CCNB2	DR2	0.976819	0
PSMD11	DR2	0.973414	0
MBP	DR2	0.973261	1.44e-171
TEAD2	DR2	0.972248	0
DNAJB6	DR2	0.972047	0
LYPLA2	DR2	0.972004	0
RFC2	DR2	0.963193	0
PAICS	DR2	0.962697	0
HNRNPA0	DR2	0.959674	0
WDR12	DR2	0.957281	1.82e-302
RFC4	DR2	0.956946	0
SPAG5	DR2	0.95536	5.96e-165
HOMER1	DR2	0.952209	3.97e-247
HNRNPA3	DR2	0.95101	0
AGTRAP	DR2	0.950644	0
FEN1	DR2	0.948937	0
CTBP2	DR2	0.947491	0
PAK1IP1	DR2	0.946953	0
TIMM8A	DR2	0.946773	0
TRAF4	DR2	0.944326	0
ZNF714	DR2	0.93922	2.61e-255
CNDP2	DR2	0.937582	0
RNF114	DR2	0.931558	0
ARID3A	DR2	0.930882	1.02e-299
NSUN5	DR2	0.929944	0
IGSF8	DR2	0.929851	1.26e-226
SAE1	DR2	0.925563	0
ZWILCH	DR2	0.924819	1.03e-260
CD79B	DR2	0.922714	4.97e-142
SLC25A39	DR2	0.921077	0
GLTP	DR2	0.92018	6.14e-215
AKAP12	DR2	0.913986	3.99e-300
CITED1	DR2	0.910323	2.54e-70
RASD1	DR2	0.910034	1.26e-102
THOC6	DR2	0.90614	0
PTGES3	DR2	0.903433	0
CLN8	DR2	0.89959	4.04e-245
HDAC1	DR2	0.897019	0
ORC6	DR2	0.896683	0
KLHDC3	DR2	0.89661	0
RYBP	DR2	0.895832	3.68e-237
KIFC1	DR2	0.894847	2.67e-224
NOP58	DR2	0.893169	0
DDX39A	DR2	0.887126	0
HSPA8	DR2	0.885398	0
XRCC6	DR2	0.879135	0
AKAP7	DR2	0.878899	3.26e-158
TMEM183A	DR2	0.876386	0
PTMA	DR2	0.873743	0
UTP6	DR2	0.872832	1.39e-290
UBE2T	DR2	0.872693	0
PTBP3	DR2	0.870792	1.67e-188
HN1	DR2	0.869786	0
ECE2	DR2	0.867031	2.51e-204
PMF1	DR2	0.865219	0
RNF5	DR2	0.862497	0
WDR74	DR2	0.862137	0
IRF7	DR2	0.862093	4.88e-148
INADL	DR2	0.861819	3.63e-145
WDR18	DR2	0.860943	0
YWHAH	DR2	0.860563	0
THOC3	DR2	0.860545	1.02e-277
CDK1	DR2	0.856106	9.61e-274
ASF1B	DR2	0.855348	1.24e-232
ITM2B	DR2	0.855207	0
RASGRF2	DR2	0.853723	1.02e-109
MRPS9	DR2	0.853464	0
PINX1	DR2	0.85283	3.12e-250
PSMA2	DR2	0.852683	0
C19orf48	DR2	0.849063	0
PSPH	DR2	0.846688	1.43e-214
PAQR4	DR2	0.844764	6.76e-146
PRPS2	DR2	0.842439	1.21e-118
NUDT21	DR2	0.841934	0
KIF22	DR2	0.840048	0
MTHFD1	DR2	0.837792	4.03e-198
ACOT7	DR2	0.837477	0
LMNB2	DR2	0.837295	1.45e-274
GTF2H2	DR2	0.835643	1.65e-199
NPM1	DR2	0.834821	0
NIPSNAP1	DR2	0.831679	2.84e-281
LMO4	DR2	0.829245	5.21e-302
MCM4	DR2	0.827496	2.23e-228
XBP1	DR2	0.826957	0
DNAJA2	DR2	0.821512	0
PCMT1	DR2	0.81763	0
ADH5	DR2	0.81415	0
UBALD1	DR2	0.813821	1.91e-188
CACYBP	DR2	0.812129	0
GART	DR2	0.811032	9.21e-267
WEE1	DR2	0.810671	1.37e-139
RPA2	DR2	0.807396	2.43e-258
ORAI1	DR2	0.806886	4.41e-195
SDC4	DR2	0.804983	6.39e-136
CSE1L	DR2	0.804952	6.81e-254
MND1	DR2	0.804074	1.98e-209
HSPD1	DR2	0.803623	0
MRPL15	DR2	0.80027	0
BTF3L4	DR2	0.799621	0
PGAM1	DR2	0.797173	0
HAUS1	DR2	0.796048	0
E2F1	DR2	0.791815	1.74e-162
KNSTRN	DR2	0.791479	1.63e-218
GMNN	DR2	0.789663	0
TUBA1C	DR2	0.789196	0
RRM2B	DR2	0.785257	9.91e-130
BLCAP	DR2	0.78279	1.41e-188
GLUD1	DR2	0.782031	1.57e-147
SRSF7	DR2	0.780863	0
NIFK	DR2	0.77696	0
RNASEH2A	DR2	0.775189	0
SNRPA	DR2	0.774577	0
RCOR1	DR2	0.77417	2.92e-116
NAA15	DR2	0.772839	2.24e-257
SRP9	DR2	0.771956	0
MRPL11	DR2	0.76853	0
CFD	DR2	0.762215	1.82e-92
MAGOHB	DR2	0.760411	1.2e-307
EMG1	DR2	0.757734	0
MOSPD1	DR2	0.756584	5.72e-116
ERP29	DR2	0.755068	0
PTGES2	DR2	0.755026	3.01e-296
PEBP1	DR2	0.75455	0
PTPN12	DR2	0.754035	1.25e-236
TALDO1	DR2	0.753258	0
PRR13	DR2	0.75208	0
L3MBTL3	DR2	0.752077	1.67e-80
CARHSP1	DR2	0.748018	0
HDAC2	DR2	0.747696	0
PDCL3	DR2	0.747654	2.69e-193
FSCN1	DR2	0.747467	0
PSMB2	DR2	0.743397	0
COMTD1	DR2	0.742114	4.01e-213
EIF4A3	DR2	0.740071	0
PPL	DR2	0.739562	1.72e-109
PIH1D1	DR2	0.738939	0
CDC123	DR2	0.738902	0
YIF1B	DR2	0.737079	0
PPP1CA	DR2	0.736185	0
SF3A3	DR2	0.733449	3.38e-299
PHB	DR2	0.731032	0
CCT4	DR2	0.728672	0
CCT3	DR2	0.727821	0
NUF2	DR2	0.727109	8.87e-209
APEX1	DR2	0.727056	0
YTHDF2	DR2	0.725456	0
SHISA5	DR2	0.723751	6.67e-277
MELK	DR2	0.719866	6.67e-155
DCTPP1	DR2	0.718325	0
UQCRH	DR2	0.716921	0
GPN3	DR2	0.712815	8e-237
HIST1H2BN	DR2	0.712173	4.51e-43
AIMP2	DR2	0.712172	4.17e-243
PSMA3	DR2	0.711547	0
DNAJC9	DR2	0.708593	3.42e-220
SUMO2	DR2	0.70672	0
DBN1	DR2	0.705818	0
ENO1	DR2	0.703842	0
DDX6	DR2	0.702999	1.18e-201
TMPO	DR2	0.702881	1.04e-244
ILF2	DR2	0.700369	0
GSTT2B	DR2	0.70016	3.97e-60
PAIP2	DR2	0.699767	0
PSMD12	DR2	0.698714	1.42e-276
C16orf87	DR2	0.698676	1.99e-166
COPS3	DR2	0.697493	7.01e-296
ABCD4	DR2	0.695875	1.6e-146
PSMB6	DR2	0.695172	0
CCDC137	DR2	0.694398	2.39e-243
OAZ2	DR2	0.692051	0
RAD23B	DR2	0.691696	1.91e-277
ZFAND6	DR2	0.691658	0
PLEKHH3	DR2	0.690142	3.93e-67
SHMT2	DR2	0.68607	6.97e-219
HMOX1	DR2	0.683703	1.72e-62
DIAPH1	DR2	0.681988	7.48e-141
DCAF13	DR2	0.679175	7.75e-260
ATP6V1G1	DR2	0.675613	0
G6PC3	DR2	0.674572	2.15e-255
PLEKHB2	DR2	0.67447	5.27e-217
NAE1	DR2	0.671233	1.37e-242
PRMT1	DR2	0.670838	0
ZDHHC12	DR2	0.670383	3.94e-232
MRPS30	DR2	0.670197	1.29e-181
RSL24D1	DR2	0.669393	0
MRPL32	DR2	0.667788	0
DUT	DR2	0.665891	1.1e-280
CNPY2	DR2	0.664631	0
PRDX4	DR2	0.656778	0
NUTF2	DR2	0.65546	0
PCNA	DR2	0.653485	5.87e-265
HNRNPM	DR2	0.652201	6.46e-302
PDHA1	DR2	0.651346	1.68e-292
PGK1	DR2	0.651318	0
CLSPN	DR2	0.650897	1.4e-218
CALM3	DR2	0.648281	0
CENPM	DR2	0.646691	4.56e-184
GTPBP4	DR2	0.645888	5.5e-248
CCT2	DR2	0.644739	0
STMN1	DR2	0.639833	0
SNRNP25	DR2	0.639729	3.52e-297
FAM35A	DR2	0.638743	2.87e-40
RANGAP1	DR2	0.638097	5.37e-140
PXN	DR2	0.635825	1.85e-112
LSM4	DR2	0.63511	0
G3BP1	DR2	0.634792	1.16e-286
TM2D2	DR2	0.634573	1.19e-205
ESF1	DR2	0.632848	7.82e-213
HMGN1	DR2	0.631506	0
DSN1	DR2	0.628772	1.05e-127
HTATIP2	DR2	0.628772	2.12e-158
MAZ	DR2	0.628192	2.42e-195
ECH1	DR2	0.626916	0
TIPIN	DR2	0.624131	8.34e-133
ZFYVE21	DR2	0.620716	2.06e-176
SAP18	DR2	0.615936	0
HNRNPL	DR2	0.615934	6.52e-109
DNTTIP2	DR2	0.614783	4.95e-184
SYPL1	DR2	0.614266	9.06e-157
MPHOSPH10	DR2	0.613508	4.36e-175
ATP5B	DR2	0.612942	0
MRPL34	DR2	0.610838	2.32e-247
LARP7	DR2	0.610725	1.42e-125
BCCIP	DR2	0.610228	4.9e-190
TPM3	DR2	0.609848	0
NOP56	DR2	0.606491	7.46e-247
NUDC	DR2	0.606339	0
UHRF1	DR2	0.601522	1.08e-110
POP7	DR2	0.598122	4.58e-268
HMGN2	DR2	0.597925	1.37e-303
HNRNPUL1	DR2	0.596549	4.76e-184
EPOR	DR2	0.595945	2.17e-83
DFFA	DR2	0.592885	9.85e-211
RNF187	DR2	0.590933	4.1e-175
RP11-727F15.9	DR2	0.590727	9.24e-44
MORF4L1	DR2	0.589769	0
MRPS34	DR2	0.589161	0
ASAH1	DR2	0.586341	2.91e-165
SLC39A14	DR2	0.584639	1.62e-86
BIRC5	DR2	0.582734	2.57e-190
UTP18	DR2	0.582121	1.14e-156
SNRPD3	DR2	0.58166	0
HYLS1	DR2	0.580581	2.3e-80
LRR1	DR2	0.580052	9.4e-145
HACD3	DR2	0.579953	2.93e-227
KIF20A	DR2	0.578594	1.42e-108
ALDH7A1	DR2	0.577593	1.68e-193
NUDT1	DR2	0.574651	2.11e-278
LSM12	DR2	0.574114	3.13e-188
ALKBH7	DR2	0.574076	8.14e-308
PRDX6	DR2	0.5697	0
SEPW1	DR2	0.568682	0
SSBP1	DR2	0.566435	0
APP	DR2	0.564994	1.74e-244
MDH1	DR2	0.564516	0
THRAP3	DR2	0.564045	0
PFN1	DR2	0.559322	0
AMD1	DR2	0.548997	4.31e-205
PSMA4	DR2	0.542601	0
IMP3	DR2	0.541417	1.78e-234
PKNOX1	DR2	0.541303	2.6e-66
SLC25A6	DR2	0.540669	0
AP2M1	DR2	0.540586	0
SRSF9	DR2	0.539701	0
C21orf59	DR2	0.53748	4.37e-147
ELOVL6	DR2	0.535697	1.44e-108
FOXM1	DR2	0.534131	1.01e-103
EIF3M	DR2	0.531878	2.34e-289
PSMB5	DR2	0.531065	0
VAT1	DR2	0.528073	5.04e-169
HSD17B7	DR2	0.526396	2.33e-89
LIG1	DR2	0.52187	1.38e-98
TRA2B	DR2	0.521359	2.65e-239
HNRNPA2B1	DR2	0.514533	0
WDR34	DR2	0.509806	9.53e-128
UCHL1	DR2	0.506719	3.1e-290
TMEM167A	DR2	0.483689	5.25e-218
NMT1	DR2	0.477209	1.38e-81
NAP1L4	DR2	0.476308	3.3e-175
ECI1	DR2	0.461449	3.67e-118
EIF5A	DR2	0.456309	3.86e-220
H2AFV	DR2	0.454585	4.18e-279
ALDOA	DR2	0.44501	0
MORN3	DR2	0.444725	5.43e-42
RPL3	DR2	0.443825	0
PSMD14	DR2	0.440196	3.97e-147
EIF3L	DR2	0.438393	2.49e-247
NHP2	DR2	0.429991	1.42e-250
ARL5A	DR2	0.429982	3.87e-148
CASP8AP2	DR2	0.427512	6.1e-67
PSMC3	DR2	0.426519	9.44e-195
GLTSCR2	DR2	0.426167	4.32e-217
CCDC47	DR2	0.423247	1.17e-87
POC1A	DR2	0.414088	4.3e-68
TMBIM6	DR2	0.412832	1.18e-244
CALM1	DR2	0.40827	7.62e-272
CANX	DR2	0.360626	3e-105
CYBA	DR2	0.347585	8.67e-150
TUBA1B	DR2	0.335253	3.63e-156
RAB4B	DR2	0.319115	2.5e-31
RALA	DR2	0.317416	5.45e-105
CYSRT1	DR2	0.317071	3.58e-15
SAC3D1	DR2	0.291975	2.61e-46
IRS2	DR2	0.248089	1.51e-28
MYO1F	DR2	0.199102	6.01e-14
IQCG	DR2	0.121684	7.24e-18
PTPRZ1	DR3	3.81185	0
KIF1A	DR3	3.79037	0
RBM46	DR3	3.68868	0
RP11-568A7.4	DR3	3.6464	0
GABRB3	DR3	3.60044	0
ATCAY	DR3	3.48311	0
TSTD1	DR3	3.45943	0
LINC01405	DR3	3.412	0
KCNQ2	DR3	3.37611	0
SCG3	DR3	3.32852	0
LRRN1	DR3	3.30244	0
PDPN	DR3	3.20709	0
TERF1	DR3	3.17751	0
IDO1	DR3	3.17231	0
TNNI3	DR3	3.17047	0
TCEAL2	DR3	3.16263	0
PWAR6	DR3	3.13007	0
USP44	DR3	3.09038	0
DPPA5	DR3	3.08305	0
DANT1	DR3	3.0255	0
IQGAP2	DR3	3.01624	0
DNMT3B	DR3	3.01502	0
PPP2R2B	DR3	3.01481	0
RP11-267L5.1	DR3	3.00637	0
ICA1	DR3	2.99784	0
PDZD4	DR3	2.99123	0
SBK1	DR3	2.9851	0
GRID2	DR3	2.97495	0
FOXD3-AS1	DR3	2.93997	0
NLGN4X	DR3	2.86795	0
GALNT3	DR3	2.85098	0
LIN28B	DR3	2.84616	0
HOOK1	DR3	2.83673	0
SLC1A6	DR3	2.8045	0
AP002856.5	DR3	2.7955	0
RP11-1144P22.1	DR3	2.79066	0
DSG2	DR3	2.77763	0
RP11-35J1.2	DR3	2.76944	0
LECT1	DR3	2.74877	0
CDH1	DR3	2.74547	0
TMEM132B	DR3	2.73807	0
HHLA1	DR3	2.72524	0
KDR	DR3	2.71415	0
DPEP3	DR3	2.70927	0
MAP7	DR3	2.70183	0
FZD3	DR3	2.69138	0
SOX2	DR3	2.68988	0
CRYGD	DR3	2.68945	0
NR6A1	DR3	2.68572	0
CHST9	DR3	2.68278	0
KIF5C	DR3	2.66865	0
RIMKLA	DR3	2.66566	0
GNG4	DR3	2.65583	0
ZIC2	DR3	2.65256	0
MATK	DR3	2.64894	0
CECR2	DR3	2.63264	0
WNK3	DR3	2.6323	0
NEFM	DR3	2.62943	0
RBFOX3	DR3	2.62902	0
DSC2	DR3	2.62629	0
TRIM71	DR3	2.62325	0
NRXN1	DR3	2.61877	0
MARVELD3	DR3	2.61426	0
UNC13A	DR3	2.60236	0
LINC01224	DR3	2.59739	0
CLDN3	DR3	2.59522	0
POLR3G	DR3	2.59032	0
PIWIL2	DR3	2.57773	0
DMKN	DR3	2.56104	0
AP000688.29	DR3	2.53555	0
CCDC144NL-AS1	DR3	2.53253	0
PREX2	DR3	2.53163	0
B3GALT1	DR3	2.52417	0
PRSS21	DR3	2.52126	0
VASH2	DR3	2.51947	0
CABP1	DR3	2.51929	0
TNNC2	DR3	2.51538	0
ADD2	DR3	2.51147	0
SCNN1A	DR3	2.50739	0
NAP1L6	DR3	2.5068	0
COBL	DR3	2.49995	0
BEX5	DR3	2.49791	0
SALL3	DR3	2.48425	0
AASS	DR3	2.47829	0
CD24	DR3	2.47748	0
RP11-390F4.6	DR3	2.47603	0
JARID2	DR3	2.4711	0
SHISA9	DR3	2.47004	0
CCDC151	DR3	2.46358	0
GPR160	DR3	2.46176	0
KLHL23	DR3	2.46136	0
TMSB4Y	DR3	2.46098	0
SALL2	DR3	2.46011	0
ZFR2	DR3	2.45773	0
CTTNBP2	DR3	2.45429	0
SLC7A3	DR3	2.44644	0
PPP1R9A	DR3	2.42683	0
SEMA6A	DR3	2.42178	0
SOX11	DR3	2.41056	0
CHST8	DR3	2.40593	0
TOX3	DR3	2.40401	0
CMTM8	DR3	2.39961	0
CCDC64B	DR3	2.39717	0
LCK	DR3	2.38919	0
NMRK2	DR3	2.38779	0
FAM57B	DR3	2.38751	0
EPB41L4B	DR3	2.3853	0
ABCA7	DR3	2.3841	0
BEX2	DR3	2.36451	0
CTC-260E6.6	DR3	2.35711	0
LPAR3	DR3	2.35439	0
SMIM24	DR3	2.354	0
BEND4	DR3	2.35219	0
CRMP1	DR3	2.35214	0
NUP210	DR3	2.34962	0
SMPD5	DR3	2.3489	0
SYNE4	DR3	2.34362	0
FAM71E1	DR3	2.34233	0
MAL2	DR3	2.33824	0
CALCB	DR3	2.3329	0
RP11-701H24.9	DR3	2.33225	0
LINC00992	DR3	2.33135	0
ELAVL2	DR3	2.32583	0
PMEL	DR3	2.32314	0
ADGRV1	DR3	2.32314	0
RP11-20D14.6	DR3	2.32283	0
RASGRP2	DR3	2.31682	0
CADM2	DR3	2.31396	0
LINC00698	DR3	2.31089	0
VRTN	DR3	2.30614	0
KRTCAP3	DR3	2.30298	0
JPH3	DR3	2.30191	0
SCGB1B2P	DR3	2.30152	0
ESPN	DR3	2.29858	0
IFITM1	DR3	2.29447	0
C19orf81	DR3	2.29057	0
PPP1R1A	DR3	2.28812	0
ITM2A	DR3	2.28149	0
TRIM24	DR3	2.27918	0
CKMT1A	DR3	2.27817	0
RBM47	DR3	2.27811	0
AIF1	DR3	2.27659	0
RIC3	DR3	2.26918	0
ARFGEF3	DR3	2.26603	0
ZIC5	DR3	2.26486	0
TTYH1	DR3	2.26335	0
DDX25	DR3	2.26166	0
CRACR2B	DR3	2.25665	0
CADPS	DR3	2.25415	0
CKMT1B	DR3	2.25067	0
LINC01108	DR3	2.24557	0
SMPDL3B	DR3	2.2451	0
RABGAP1L	DR3	2.24207	0
ESRP1	DR3	2.23443	0
LINC00678	DR3	2.22937	0
OLFM1	DR3	2.22899	0
EDNRB	DR3	2.22662	0
GYLTL1B	DR3	2.22245	0
TMEM145	DR3	2.22011	0
ATP1B2	DR3	2.21628	0
ZIC3	DR3	2.21542	0
L1TD1	DR3	2.21215	0
GRM4	DR3	2.20856	0
DPPA4	DR3	2.2045	0
CTD-2142D14.1	DR3	2.19727	0
ATP1A2	DR3	2.19563	0
PODXL	DR3	2.19124	0
KLKB1	DR3	2.18636	0
CTD-2162K18.4	DR3	2.18269	0
SCT	DR3	2.17376	0
HSD11B2	DR3	2.17055	0
VWDE	DR3	2.16301	0
PHC1	DR3	2.1614	0
SELV	DR3	2.1562	0
AP1M2	DR3	2.15485	0
SORL1	DR3	2.15287	0
AC074289.1	DR3	2.15213	0
SYNGR3	DR3	2.14318	0
RP11-132A1.4	DR3	2.13772	0
NEB	DR3	2.13597	1.28e-300
FAT3	DR3	2.13225	0
TCEAL5	DR3	2.12786	0
CRIP3	DR3	2.12665	0
RP11-562F9.2	DR3	2.12231	0
PLCH1	DR3	2.11932	0
YBX2	DR3	2.118	0
IGSF9	DR3	2.11769	0
ZNF850	DR3	2.11654	0
ITGA2B	DR3	2.11135	0
GLDC	DR3	2.11076	0
ZNF208	DR3	2.1094	0
PRKCQ	DR3	2.10787	0
BEX1	DR3	2.1076	0
SPIB	DR3	2.10354	0
EPHX3	DR3	2.10188	0
C19orf33	DR3	2.1017	0
PIF1	DR3	2.10088	0
RIT2	DR3	2.09165	0
ADCY2	DR3	2.09121	0
PIPOX	DR3	2.08959	0
WIPF3	DR3	2.0892	0
RAB11FIP4	DR3	2.0878	0
NEFL	DR3	2.08691	0
NOXO1	DR3	2.0866	0
PALM3	DR3	2.08488	0
CLDN10	DR3	2.07871	0
HELLS	DR3	2.07254	0
HESX1	DR3	2.06798	0
IGLON5	DR3	2.06728	0
TMEM125	DR3	2.06467	0
EMB	DR3	2.06306	0
PHLPP1	DR3	2.05915	0
SAP25	DR3	2.05556	0
POU3F1	DR3	2.05039	3.27e-291
FOXB1	DR3	2.05038	1.04e-303
MDN1	DR3	2.04185	0
EDIL3	DR3	2.03998	0
SALL4	DR3	2.03757	0
CD19	DR3	2.03278	0
C6orf132	DR3	2.02418	0
TCL1A	DR3	2.02027	0
PRDM14	DR3	2.01995	0
PCSK1N	DR3	2.01923	0
ZNF483	DR3	2.01812	0
IGSF1	DR3	2.01116	0
KIF5A	DR3	2.01115	0
NUDT10	DR3	2.01109	0
RP11-11N9.4	DR3	2.006	0
PAIP2B	DR3	1.99863	0
HRK	DR3	1.99454	2.31e-258
CRABP1	DR3	1.99442	0
FAM60A	DR3	1.99413	0
DOC2A	DR3	1.98926	1.02e-299
RP11-148B6.1	DR3	1.98492	0
C11orf98	DR3	1.98408	0
EPB41	DR3	1.98179	0
SEMA6B	DR3	1.97106	7.7e-261
RP11-44F21.5	DR3	1.97026	0
GPR143	DR3	1.96674	0
RP11-532F12.5	DR3	1.96339	0
RP11-469A15.2	DR3	1.95957	0
SDCCAG8	DR3	1.95579	0
CAMKV	DR3	1.95564	0
RP11-132A1.3	DR3	1.9547	0
KDF1	DR3	1.94557	0
FAM124A	DR3	1.93879	0
F12	DR3	1.93873	0
ADAMTS19	DR3	1.93542	0
VAV1	DR3	1.93474	1.34e-296
AMT	DR3	1.9303	0
ACVR2B	DR3	1.9291	0
CTD-2021H9.3	DR3	1.92708	9.71e-269
ANOS1	DR3	1.91727	0
RP11-320N7.2	DR3	1.91663	0
MT1F	DR3	1.91547	0
LINC01220	DR3	1.90786	2.45e-87
RP11-256I9.2	DR3	1.90726	0
FBXO2	DR3	1.89827	0
ADGRL1	DR3	1.89561	0
JADE1	DR3	1.89532	0
ARHGEF5	DR3	1.89159	0
NOS1AP	DR3	1.89096	0
CNKSR2	DR3	1.88854	1.9e-236
FGFR2	DR3	1.88617	0
TIAM1	DR3	1.88411	1.21e-285
CD74	DR3	1.88218	0
BCL11A	DR3	1.8818	0
DND1	DR3	1.87992	0
SLC7A2	DR3	1.86339	5.86e-299
FXYD6	DR3	1.85796	0
INSR	DR3	1.85605	0
UGT8	DR3	1.85423	1.38e-254
NASP	DR3	1.85264	0
MYLIP	DR3	1.84994	0
AC100830.3	DR3	1.84128	0
ENHO	DR3	1.84084	0
ADAMTS16	DR3	1.83998	4.34e-252
ZNF891	DR3	1.83818	0
GNG7	DR3	1.83585	7.54e-246
NSUN7	DR3	1.83388	2.4e-271
TMEM38A	DR3	1.81977	9.14e-242
NOVA1	DR3	1.81295	4.19e-279
RP11-114H21.2	DR3	1.81142	4.39e-260
PROCA1	DR3	1.81052	0
SLCO1A2	DR3	1.80887	8.74e-213
USP9X	DR3	1.80805	0
SRRM3	DR3	1.80413	2.74e-257
MARVELD2	DR3	1.7956	9.59e-292
RP11-360K13.1	DR3	1.79199	1.78e-192
AC007405.6	DR3	1.78469	1.01e-266
PLPPR3	DR3	1.78457	0
CGN	DR3	1.78379	5.63e-292
LRAT	DR3	1.78333	6.94e-270
FLT3LG	DR3	1.78288	3.95e-94
FHIT	DR3	1.78052	8.78e-251
CDS1	DR3	1.77335	1.85e-257
PDE9A	DR3	1.7651	1.38e-279
SNX10	DR3	1.76074	2.09e-252
SNRPN	DR3	1.75755	0
GNG3	DR3	1.75642	1.63e-216
SIT1	DR3	1.75579	7.29e-219
STRBP	DR3	1.75546	0
ROR1	DR3	1.75433	0
PLA2G4C	DR3	1.74997	9.29e-250
BUB1B	DR3	1.74935	0
PDE4C	DR3	1.74479	2.11e-213
TCF7L1	DR3	1.74323	0
ADRBK2	DR3	1.74267	1.07e-256
CRYBB1	DR3	1.74157	0
AUTS2	DR3	1.74029	0
TMSB15A	DR3	1.73984	0
MAGI2	DR3	1.72423	6.16e-263
RP11-796E2.4	DR3	1.72343	1.67e-221
FXYD7	DR3	1.7223	0
RAB3IP	DR3	1.72186	0
ZNF649	DR3	1.72075	0
ZBTB44	DR3	1.71952	0
B4GALT6	DR3	1.71837	5.91e-230
RAB11FIP1	DR3	1.71571	0
LLGL2	DR3	1.71277	3.56e-291
STK33	DR3	1.70616	1.93e-286
ARHGEF35	DR3	1.7026	0
ZNF589	DR3	1.70249	0
PAM16	DR3	1.69972	0
MYEF2	DR3	1.69873	0
ZNF770	DR3	1.69745	0
MBTD1	DR3	1.69348	0
CAMK1D	DR3	1.69294	1.57e-232
KAT7	DR3	1.69034	0
PYY	DR3	1.68802	8.04e-235
BMP7	DR3	1.68759	0
ANK3	DR3	1.68317	0
MIB2	DR3	1.68085	0
LIN28A	DR3	1.67631	0
RAC3	DR3	1.67485	0
GAL3ST1	DR3	1.67282	1.45e-197
MLLT4	DR3	1.66904	0
ENO2	DR3	1.66824	0
CYYR1	DR3	1.66106	8.36e-300
CCDC172	DR3	1.66067	0
SLC7A8	DR3	1.65786	0
GRTP1	DR3	1.65684	0
PSIP1	DR3	1.65593	0
MYO10	DR3	1.65391	0
ZNF462	DR3	1.64477	0
HBA2	DR3	1.6442	2.97e-235
PF4	DR3	1.64344	2.48e-266
TTC9	DR3	1.64112	1.15e-185
RPRML	DR3	1.64093	3.87e-176
LINC00337	DR3	1.64001	3.47e-177
FLVCR1-AS1	DR3	1.63973	0
B3GALT5	DR3	1.63387	4.23e-219
CORO2A	DR3	1.63109	0
RP11-746M1.1	DR3	1.63065	3.31e-174
ZNF724P	DR3	1.63026	0
CA11	DR3	1.63024	0
MSH2	DR3	1.62504	0
USP28	DR3	1.62415	0
DNMT3A	DR3	1.62328	0
SKIL	DR3	1.62016	0
RHBDL1	DR3	1.61016	1.51e-263
TRPM4	DR3	1.60707	0
NRN1L	DR3	1.60411	1.51e-168
SET	DR3	1.59969	0
MTL5	DR3	1.59858	0
PLA2G16	DR3	1.59494	0
TIMELESS	DR3	1.59355	0
IGF2BP1	DR3	1.59232	0
SAMD1	DR3	1.59178	0
TXLNG	DR3	1.5882	0
ZNF883	DR3	1.58381	4.88e-306
PARP1	DR3	1.57719	0
EGFL7	DR3	1.57673	0
ZNF560	DR3	1.57569	1.13e-215
SRGAP3	DR3	1.57468	2.04e-192
FOXO1	DR3	1.57154	0
RP11-326K13.4	DR3	1.5712	2.66e-181
TMEM59L	DR3	1.56878	5.86e-231
TFDP2	DR3	1.56738	0
ZDHHC22	DR3	1.5649	4.89e-158
NKX1-2	DR3	1.5646	7.69e-161
ZNF738	DR3	1.56445	0
KIF26A	DR3	1.56217	1.66e-176
PRRG4	DR3	1.5615	3.18e-164
SORBS1	DR3	1.56055	9.26e-241
MSH6	DR3	1.55967	0
LARS	DR3	1.55138	0
TTF2	DR3	1.55124	0
FAM222B	DR3	1.55096	0
NPB	DR3	1.5492	2.23e-238
PLXDC2	DR3	1.54826	4.02e-178
RP11-498P14.5	DR3	1.54403	5.01e-161
PTPRN	DR3	1.54294	1.4e-178
CNFN	DR3	1.54274	0
HELB	DR3	1.54116	4e-229
MOB3B	DR3	1.53837	4.82e-230
TGIF2	DR3	1.53823	0
PWWP2A	DR3	1.53355	0
FLVCR1	DR3	1.52857	0
EFNA3	DR3	1.52818	4.91e-151
STK26	DR3	1.52781	0
NEFH	DR3	1.52641	1.79e-220
INO80D	DR3	1.52455	0
ATP2A1-AS1	DR3	1.51761	1.64e-262
FXYD1	DR3	1.5173	0
ZNF398	DR3	1.51183	9.59e-277
TMEM52	DR3	1.51107	2.95e-226
GFPT2	DR3	1.50867	0
PARD6B	DR3	1.50846	1.07e-272
HLA-DPB1	DR3	1.50699	0
NAP1L3	DR3	1.5064	2.13e-164
SLC6A8	DR3	1.50464	1.08e-271
ENAH	DR3	1.47083	0
PGM2L1	DR3	1.47007	0
NFE2L3	DR3	1.46891	0
LAD1	DR3	1.46395	1.04e-242
UGP2	DR3	1.46234	0
FKBP5	DR3	1.46158	7.04e-251
CENPF	DR3	1.46116	0
MT-ATP8	DR3	1.45813	0
HIP1	DR3	1.45626	0
TJP2	DR3	1.45425	0
KIF21A	DR3	1.43991	2.88e-289
UBN2	DR3	1.43803	0
FABP6	DR3	1.43435	1.11e-116
MTA3	DR3	1.43213	0
PLPP2	DR3	1.42686	0
LRRK1	DR3	1.42608	4.88e-190
DAPK1	DR3	1.42426	3.1e-284
RBP1	DR3	1.4241	0
MIS18A	DR3	1.42397	0
CCDC136	DR3	1.42249	5.77e-231
NME2	DR3	1.41672	0
KCNN2	DR3	1.4158	6.92e-224
SLC39A10	DR3	1.41335	0
ERBB2	DR3	1.41042	4.59e-291
SLC38A1	DR3	1.40798	0
CCDC181	DR3	1.40739	7.09e-119
ATP1B1	DR3	1.40634	0
ZNF121	DR3	1.40084	0
ARID3B	DR3	1.40055	0
MYSM1	DR3	1.40041	0
PAWR	DR3	1.40026	0
ZFHX2	DR3	1.39809	3e-169
ITGA7	DR3	1.39717	5.69e-151
ZSCAN18	DR3	1.39299	1.1e-252
IGF2BP3	DR3	1.38956	0
FAM161A	DR3	1.3858	8.19e-288
MAEL	DR3	1.37817	8.75e-111
LINC01315	DR3	1.37309	4.24e-209
ZNF711	DR3	1.36152	6.92e-139
PAK1	DR3	1.36053	0
HMGN5	DR3	1.36051	0
GAP43	DR3	1.35894	0
KDM5B	DR3	1.3547	0
USP7	DR3	1.35339	0
UGT3A2	DR3	1.35181	1.07e-187
STAM-AS1	DR3	1.35146	1.07e-87
N4BP2	DR3	1.35109	0
NELL2	DR3	1.34995	1.64e-120
FNBP1L	DR3	1.34883	0
GIGYF1	DR3	1.34642	2.74e-243
PRR14L	DR3	1.3437	0
RP11-297N6.4	DR3	1.34181	1.03e-64
CDCA7L	DR3	1.34008	0
POU2F1	DR3	1.33922	0
VRK1	DR3	1.33885	0
C10orf35	DR3	1.33484	1.96e-215
NAV2	DR3	1.32652	2.8e-243
RP11-449H3.3	DR3	1.32417	1.09e-131
PGAM2	DR3	1.32075	5.74e-189
KNOP1	DR3	1.31947	0
ANP32E	DR3	1.31832	0
CHAF1A	DR3	1.317	0
UQCRHL	DR3	1.31361	3.15e-247
SYT5	DR3	1.3135	6.97e-111
ZNF844	DR3	1.31111	6.24e-128
TAC3	DR3	1.31027	1.02e-189
SMARCC1	DR3	1.30667	0
KIF15	DR3	1.30117	1.96e-187
TMEM91	DR3	1.29966	7.63e-179
ago-01	DR3	1.29912	6.14e-287
HOOK2	DR3	1.299	0
DHX33	DR3	1.28967	0
ZNF585A	DR3	1.28961	1.16e-143
OVOS2	DR3	1.28822	2.13e-107
INA	DR3	1.28711	9.19e-151
NUFIP2	DR3	1.28481	0
EPS8L1	DR3	1.28134	2.57e-257
EHMT2	DR3	1.28083	0
FGD4	DR3	1.27798	2.89e-220
SLC16A1	DR3	1.277	0
LARP1B	DR3	1.27654	0
ZNF281	DR3	1.2718	0
DCP2	DR3	1.26947	0
RNF44	DR3	1.26883	3.3e-278
FKBP1B	DR3	1.26544	0
TOP2A	DR3	1.26449	0
TRIM37	DR3	1.26421	0
CIB2	DR3	1.26277	0
PMS1	DR3	1.26212	0
MTF2	DR3	1.25689	0
B4GALT5	DR3	1.25583	3.5e-257
AKIRIN1	DR3	1.25336	0
RASIP1	DR3	1.25043	2.84e-215
XPO1	DR3	1.24901	0
SAPCD2	DR3	1.24854	3.94e-123
BPTF	DR3	1.24584	0
CTCF	DR3	1.24553	0
HLTF	DR3	1.24545	0
ZNF667-AS1	DR3	1.24274	0
GSTO2	DR3	1.24044	0
CD2AP	DR3	1.23998	0
CENPH	DR3	1.23727	0
HAGHL	DR3	1.23632	0
CD3EAP	DR3	1.23497	0
SLC25A29	DR3	1.23462	1.53e-254
MED22	DR3	1.23215	5.44e-235
COX7C	DR3	1.22971	0
QSER1	DR3	1.22873	0
CASC15	DR3	1.22681	1.1e-146
TNNT1	DR3	1.22647	0
KIAA0368	DR3	1.22546	9.16e-288
CEND1	DR3	1.2196	9.05e-97
SYNE2	DR3	1.21931	0
RIF1	DR3	1.21837	0
HIST1H4J	DR3	1.2161	5.38e-98
MYO1E	DR3	1.21503	7.24e-209
CKS1B	DR3	1.21468	0
BUB1	DR3	1.21451	4.77e-202
UBE2O	DR3	1.21272	5.18e-285
SUPT16H	DR3	1.21269	0
TRAPPC6A	DR3	1.21242	0
ICE1	DR3	1.21231	0
RFX1	DR3	1.21077	3.32e-277
MROH8	DR3	1.21026	7.52e-52
EFNB3	DR3	1.20991	6.12e-134
LRRC8B	DR3	1.20794	6.63e-145
WRN	DR3	1.20782	3.51e-200
H3F3A	DR3	1.20403	0
PBX1	DR3	1.20205	0
SYTL1	DR3	1.20084	1.68e-147
ZNF814	DR3	1.20049	2.39e-271
CCNE1	DR3	1.19828	0
RBPJ	DR3	1.19489	0
HNRNPAB	DR3	1.19223	0
MAPK6	DR3	1.19186	0
LAGE3	DR3	1.19008	0
MTRNR2L8	DR3	1.18872	0
BLM	DR3	1.1883	1.09e-209
FAM64A	DR3	1.18798	0
SMC3	DR3	1.18764	0
WDHD1	DR3	1.18617	1.69e-222
RP1-313I6.12	DR3	1.18539	8.41e-121
ZNF766	DR3	1.18303	3.03e-293
CCDC152	DR3	1.17585	7.82e-235
ATP8A2	DR3	1.17486	3.48e-89
MFSD3	DR3	1.1743	5.41e-304
HIST1H1A	DR3	1.17407	0
FGF2	DR3	1.17218	0
RPP21	DR3	1.16778	1.4e-281
NFXL1	DR3	1.16488	4.41e-227
PSMB10	DR3	1.16375	2.49e-244
MCM3	DR3	1.16357	0
METTL21A	DR3	1.15378	0
MRPS24	DR3	1.14947	1.92e-243
HK2	DR3	1.14927	7.01e-110
KDM4A	DR3	1.14899	5.31e-188
PTPRF	DR3	1.14655	0
AFG3L2	DR3	1.14417	0
SEZ6L2	DR3	1.14383	2.68e-272
IRX2	DR3	1.14129	4.35e-61
SOX4	DR3	1.13788	0
HMGN3	DR3	1.13445	0
PTCH2	DR3	1.13418	1.59e-55
FANCD2	DR3	1.13311	2.63e-248
PRKDC	DR3	1.13306	0
THYN1	DR3	1.13239	0
EPPK1	DR3	1.13221	2.3e-97
HSP90AB1	DR3	1.1322	0
NMB	DR3	1.13213	0
SLC1A3	DR3	1.13101	1.11e-145
ZBTB24	DR3	1.13047	1.73e-208
SUDS3	DR3	1.12837	0
ARHGEF10	DR3	1.1273	3.16e-225
ZNF677	DR3	1.12635	0
CDC25A	DR3	1.12574	3.35e-190
CELF1	DR3	1.12073	0
HNRNPD	DR3	1.11976	0
ZMYM2	DR3	1.1196	0
UPF3B	DR3	1.11757	0
MIS18BP1	DR3	1.11722	0
NLN	DR3	1.1124	0
ARHGAP11B	DR3	1.11224	3.71e-147
RRP1B	DR3	1.10929	0
PELP1	DR3	1.10915	0
HSP90AA1	DR3	1.10909	0
KMT5B	DR3	1.10898	1.17e-304
NUDT14	DR3	1.1078	2.47e-275
ATG14	DR3	1.10517	5.11e-204
KRAS	DR3	1.10463	0
INCENP	DR3	1.10374	1.01e-139
HMMR	DR3	1.10183	0
TRAPPC5	DR3	1.10005	6.46e-143
BRCA2	DR3	1.09925	3.22e-168
G2E3	DR3	1.0989	1.21e-265
ILF3-AS1	DR3	1.0987	1.91e-293
SART3	DR3	1.09759	3.87e-290
PCLO	DR3	1.09618	7.01e-75
RP11-467L13.7	DR3	1.09603	1.28e-50
C1QTNF4	DR3	1.09594	1.63e-125
ACAP1	DR3	1.09464	7.43e-157
NCL	DR3	1.09258	0
AKAP1	DR3	1.09132	9.12e-170
RAB3A	DR3	1.09001	6.62e-128
GABPB1-AS1	DR3	1.08969	0
ZNF518A	DR3	1.0819	1.72e-303
AL132709.8	DR3	1.08023	5.06e-116
MMD	DR3	1.0798	5.52e-200
INTU	DR3	1.07848	5.15e-148
FCHO1	DR3	1.0769	6.12e-127
CCDC58	DR3	1.07626	0
AGPAT5	DR3	1.07445	1.53e-246
TCF3	DR3	1.07193	4.01e-294
CEBPZ	DR3	1.06977	0
STX16	DR3	1.0688	2.11e-300
RP5-821D11.7	DR3	1.06545	1.04e-60
MPP6	DR3	1.06124	0
[truncated: 4,275 more rows]

## Sheet: Table S8
Table S8. Results from Interaction Score Analysis.
Ligand-Receptor pair	Days	Interaction Score	Standardized Interaction Score	Empirical P-Value
ADM-CALCRL	D3	4.08509	16.1115	0
ADM-CALCRL	D5	6.60922	29.2546	0
ADM-CALCRL	D7	4.89979	19.6264	0
ADM-CALCRL	D9	0.434262	-10.2864	1
ADM-CALCRL	D11	0.191246	-11.9096	1
ADM-CALCRL	D13	0.244159	-13.0672	1
ADM-CALCRL	D15	0.170066	-8.60698	1
ADM-RAMP2	D3	0.552884	-19.8892	1
ADM-RAMP2	D5	2.23269	-8.74371	1
ADM-RAMP2	D7	7.12947	15.7534	0
ADM-RAMP2	D9	6.62875	14.0165	0
ADM-RAMP2	D11	8.9648	25.3555	0
ADM-RAMP2	D13	8.17551	20.4079	0
ADM-RAMP2	D15	6.6232	6.72121	0
AREG-EGFR	D3	0.6119	2.75956	0.0059
AREG-EGFR	D5	0.580384	1.84156	0.0408
AREG-EGFR	D7	0.344153	-3.01523	0.9997
AREG-EGFR	D9	0.043659	-10.2074	1
AREG-EGFR	D11	0.103296	-7.84111	1
AREG-EGFR	D13	0.143848	-4.48503	1
AREG-EGFR	D15	0.083476	-2.23056	0.9967
AREG-ERBB3	D3	0.068285	-8.9175	1
AREG-ERBB3	D5	0.152104	-5.85806	1
AREG-ERBB3	D7	0.35305	-1.33142	0.913
AREG-ERBB3	D9	0.668503	7.39485	0
AREG-ERBB3	D11	1.54264	27.2525	0
AREG-ERBB3	D13	2.23564	29.2232	0
AREG-ERBB3	D15	1.85816	9.85083	0
BMP4-BMPR1A	D3	0.546353	-15.4299	1
BMP4-BMPR1A	D5	1.53301	-6.75458	1
BMP4-BMPR1A	D7	3.07457	3.86197	0.0003
BMP4-BMPR1A	D9	6.53936	31.346	0
BMP4-BMPR1A	D11	5.68877	22.9365	0
BMP4-BMPR1A	D13	3.24944	4.32304	0
BMP4-BMPR1A	D15	2.50554	-0.08264	0.5297
BMP4-BMPR2	D3	0.794124	-15.4822	1
BMP4-BMPR2	D5	1.44317	-9.69625	1
BMP4-BMPR2	D7	2.95817	-1.00903	0.8476
BMP4-BMPR2	D9	3.34226	1.53244	0.0658
BMP4-BMPR2	D11	3.151	0.220072	0.4021
BMP4-BMPR2	D13	1.73973	-7.14989	1
BMP4-BMPR2	D15	1.29904	-4.22128	1
DKK1-LRP5	D3	1.19708	-1.15138	0.8754
DKK1-LRP5	D5	1.79061	4.83701	0.0001
DKK1-LRP5	D7	1.76282	4.8961	0
DKK1-LRP5	D9	0.846042	-5.21724	1
DKK1-LRP5	D11	1.77496	5.1511	0
DKK1-LRP5	D13	1.54043	2.24577	0.0155
DKK1-LRP5	D15	0.876193	-1.91357	0.9768
DKK1-LRP6	D3	3.04273	1.28981	0.1013
DKK1-LRP6	D5	3.82527	6.1578	0
DKK1-LRP6	D7	3.78908	6.47142	0
DKK1-LRP6	D9	2.19799	-5.02156	1
DKK1-LRP6	D11	3.91926	7.02761	0
DKK1-LRP6	D13	3.96659	5.17813	0
DKK1-LRP6	D15	3.08318	0.439516	0.3194
FBN1-ITGA5	D3	2.88728	-7.24793	1
FBN1-ITGA5	D5	3.20763	-4.95584	1
FBN1-ITGA5	D7	3.93191	-2.08958	0.982
FBN1-ITGA5	D9	1.26422	-17.1611	1
FBN1-ITGA5	D11	3.64852	-3.69999	1
FBN1-ITGA5	D13	4.98966	2.52954	0.0061
FBN1-ITGA5	D15	4.00797	-0.58707	0.7186
FBN1-ITGAV	D3	4.22188	-2.7599	0.9978
FBN1-ITGAV	D5	5.32192	2.38295	0.0098
FBN1-ITGAV	D7	5.57392	3.97633	0
FBN1-ITGAV	D9	1.81527	-16.2348	1
FBN1-ITGAV	D11	5.20609	2.22486	0.0134
FBN1-ITGAV	D13	8.95877	15.1185	0
FBN1-ITGAV	D15	6.95681	3.3879	0.0004
FBN1-ITGB1	D3	10.089	-5.14942	1
FBN1-ITGB1	D5	10.4128	-3.88508	0.9998
FBN1-ITGB1	D7	11.1189	-2.72098	0.9969
FBN1-ITGB1	D9	6.65432	-16.4915	1
FBN1-ITGB1	D11	19.4529	19.0338	0
FBN1-ITGB1	D13	25.8853	20.6505	0
FBN1-ITGB1	D15	29.0853	10.5713	0
FGF2-FGFR1	D3	4.35629	-13.0602	1
FGF2-FGFR1	D5	4.09747	-12.4814	1
FGF2-FGFR1	D7	5.65675	-7.63655	1
FGF2-FGFR1	D9	5.99476	-6.37924	1
FGF2-FGFR1	D11	7.06761	-1.15767	0.8783
FGF2-FGFR1	D13	6.50542	-2.16854	0.9838
FGF2-FGFR1	D15	9.62441	2.42937	0.0089
FGF2-FGFR2	D3	0.016572	-12.0438	1
FGF2-FGFR2	D5	0.204326	-8.09356	1
FGF2-FGFR2	D7	0.867894	-1.10484	0.8661
FGF2-FGFR2	D9	2.38877	17.9363	0
FGF2-FGFR2	D11	2.43642	18.6505	0
FGF2-FGFR2	D13	2.05323	14.5862	0
FGF2-FGFR2	D15	2.80329	13.8638	0
FGF2-FGFR3	D3	0.037951	-9.19652	1
FGF2-FGFR3	D5	0.225144	-5.03266	1
FGF2-FGFR3	D7	1.17896	9.57089	0
FGF2-FGFR3	D9	2.23896	28.5769	0
FGF2-FGFR3	D11	0.920824	6.13095	0
FGF2-FGFR3	D13	0.419226	-2.70774	0.9983
FGF2-FGFR3	D15	0.433628	-1.55884	0.9453
FGF2-FGFR4	D3	0.161271	-12.0602	1
FGF2-FGFR4	D5	0.680699	-5.55651	1
FGF2-FGFR4	D7	1.26456	-0.1721	0.5634
FGF2-FGFR4	D9	3.97898	29.7155	0
FGF2-FGFR4	D11	3.85136	28.215	0
FGF2-FGFR4	D13	1.83648	6.05319	0
FGF2-FGFR4	D15	2.41705	6.5826	0
FGF2-FGFRL1	D3	0.930941	0.798496	0.2112
FGF2-FGFRL1	D5	0.761435	-1.30936	0.9123
FGF2-FGFRL1	D7	0.925974	0.646238	0.2528
FGF2-FGFRL1	D9	0.604623	-3.62875	1
FGF2-FGFRL1	D11	0.638985	-3.18704	0.9998
FGF2-FGFRL1	D13	0.944832	1.03702	0.1445
FGF2-FGFRL1	D15	1.20293	2.7911	0.0031
FGF2-SDC1	D3	3.36617	-3.86008	1
FGF2-SDC1	D5	2.66558	-7.20165	1
FGF2-SDC1	D7	4.30566	2.08799	0.0192
FGF2-SDC1	D9	2.15449	-11.8542	1
FGF2-SDC1	D11	2.80761	-6.98728	1
FGF2-SDC1	D13	2.63331	-5.86969	1
FGF2-SDC1	D15	2.46526	-2.94041	0.9989
FGF2-SDC4	D3	1.52166	-13.1606	1
FGF2-SDC4	D5	2.58745	-5.20256	1
FGF2-SDC4	D7	3.07026	-2.63153	0.9962
FGF2-SDC4	D9	4.67281	8.20656	0
FGF2-SDC4	D11	3.88428	2.57009	0.0059
FGF2-SDC4	D13	2.44094	-5.19837	1
FGF2-SDC4	D15	2.45925	-2.31455	0.9902
GPI-AMFR	D3	2.59623	-4.31639	1
GPI-AMFR	D5	4.84288	8.10497	0
GPI-AMFR	D7	5.54728	12.1305	0
GPI-AMFR	D9	3.80084	2.97098	0.0026
GPI-AMFR	D11	2.09948	-7.04666	1
GPI-AMFR	D13	1.32767	-12.9288	1
GPI-AMFR	D15	1.14724	-8.74656	1
HGF-MET	D3	2.17372	21.8303	0
HGF-MET	D5	2.07349	17.6623	0
HGF-MET	D7	1.68541	13.6007	0
HGF-MET	D9	0.231319	-9.90862	1
HGF-MET	D11	0.364482	-7.1101	1
HGF-MET	D13	0.222577	-6.8508	1
HGF-MET	D15	0.192696	-3.15747	0.9999
HGF-SDC1	D3	2.17109	2.74434	0.005
HGF-SDC1	D5	2.21588	2.79005	0.0039
HGF-SDC1	D7	2.44904	5.28567	0
HGF-SDC1	D9	0.389224	-13.7856	1
HGF-SDC1	D11	1.2708	-4.85376	1
HGF-SDC1	D13	0.860819	-5.37441	1
HGF-SDC1	D15	0.506179	-3.01263	0.9992
IGF2-IGF1R	D3	0.392472	-10.5314	1
IGF2-IGF1R	D5	0.711589	-5.78976	1
IGF2-IGF1R	D7	1.92617	8.42458	0
IGF2-IGF1R	D9	1.04435	-2.56957	0.9971
IGF2-IGF1R	D11	3.10383	21.654	0
IGF2-IGF1R	D13	3.07628	14.4758	0
IGF2-IGF1R	D15	3.23734	6.82538	0
IGF2-IGF2R	D3	1.01156	-3.50959	0.9999
IGF2-IGF2R	D5	1.38245	0.731569	0.2285
IGF2-IGF2R	D7	2.52793	14.532	0
IGF2-IGF2R	D9	0.710774	-7.49819	1
IGF2-IGF2R	D11	2.19618	9.95709	0
IGF2-IGF2R	D13	2.05041	5.63687	0
IGF2-IGF2R	D15	2.22962	2.95256	0.0021
IGF2-INSR	D3	0.195927	-7.68246	1
IGF2-INSR	D5	0.349644	-3.64425	1
IGF2-INSR	D7	0.68967	3.16138	0.0015
IGF2-INSR	D9	0.230749	-6.82825	1
IGF2-INSR	D11	1.72733	24.8488	0
IGF2-INSR	D13	1.97578	23.9564	0
IGF2-INSR	D15	2.34646	13.9553	0
IL11-IL11RA	D3	0.278479	-7.51086	1
IL11-IL11RA	D5	0.416686	-4.82362	1
IL11-IL11RA	D7	0.46467	-4.95303	1
IL11-IL11RA	D9	0.466469	-5.14816	1
IL11-IL11RA	D11	0.776118	0.124209	0.4365
IL11-IL11RA	D13	0.801655	0.30593	0.3703
IL11-IL11RA	D15	0.89515	0.492397	0.2993
IL11-IL6ST	D3	0.258549	-9.12505	1
IL11-IL6ST	D5	0.346569	-7.18479	1
IL11-IL6ST	D7	0.47556	-6.83611	1
IL11-IL6ST	D9	0.788185	-3.06862	0.9995
IL11-IL6ST	D11	0.9352	-0.89398	0.8123
IL11-IL6ST	D13	0.912058	-0.73705	0.7651
IL11-IL6ST	D15	0.855271	-0.45236	0.6541
IL6-IL6ST	D3	0.020165	-8.73412	1
IL6-IL6ST	D5	0.240193	-4.33957	1
IL6-IL6ST	D7	0.256425	-4.91896	1
IL6-IL6ST	D9	0.481689	-0.57337	0.7094
IL6-IL6ST	D11	0.28966	-3.70386	1
IL6-IL6ST	D13	0.118575	-3.94372	1
IL6-IL6ST	D15	0.101098	-1.68436	0.9736
INHBA-ACVR1	D3	0.202485	-11.5664	1
INHBA-ACVR1	D5	1.0346	-0.21612	0.5781
INHBA-ACVR1	D7	1.42505	4.9481	0.0001
INHBA-ACVR1	D9	1.25178	2.86205	0.0036
INHBA-ACVR1	D11	1.86755	10.5437	0
INHBA-ACVR1	D13	2.24846	11.303	0
INHBA-ACVR1	D15	2.43912	5.608	0
INHBA-ACVR1B	D3	0.103046	-7.90161	1
INHBA-ACVR1B	D5	0.24637	-3.50414	1
INHBA-ACVR1B	D7	0.525691	2.91496	0.0034
INHBA-ACVR1B	D9	0.252163	-3.93237	1
INHBA-ACVR1B	D11	1.08778	16.8242	0
INHBA-ACVR1B	D13	1.86871	31.6123	0
INHBA-ACVR1B	D15	2.64394	23.1545	0
INHBA-ACVR2A	D3	0.115127	-8.96375	1
INHBA-ACVR2A	D5	0.387017	-2.62726	0.9974
INHBA-ACVR2A	D7	0.64388	2.21269	0.0175
INHBA-ACVR2A	D9	0.429801	-2.19589	0.9895
INHBA-ACVR2A	D11	1.35677	16.8463	0
INHBA-ACVR2A	D13	2.87792	40.8582	0
INHBA-ACVR2A	D15	3.66786	24.8885	0
INHBA-ACVR2B	D3	0.200939	-13.6542	1
INHBA-ACVR2B	D5	0.61361	-7.29861	1
INHBA-ACVR2B	D7	1.72088	5.03387	0
INHBA-ACVR2B	D9	1.99321	8.6682	0
INHBA-ACVR2B	D11	7.1754	65.7656	0
INHBA-ACVR2B	D13	11.0557	75.8863	0
INHBA-ACVR2B	D15	17.5589	54.5415	0
INHBA-ENG	D3	0.636088	-10.6928	1
INHBA-ENG	D5	1.21027	-5.39439	1
INHBA-ENG	D7	1.92741	-0.13088	0.5466
INHBA-ENG	D9	0.515772	-13.0925	1
INHBA-ENG	D11	1.93634	-0.04221	0.5092
INHBA-ENG	D13	2.34313	2.09635	0.0214
INHBA-ENG	D15	2.00943	0.158946	0.4238
JAG1-NOTCH1	D3	0.140596	-9.74984	1
JAG1-NOTCH1	D5	0.45462	-3.00395	0.9998
JAG1-NOTCH1	D7	1.14252	9.42616	0
JAG1-NOTCH1	D9	1.03676	8.21107	0
JAG1-NOTCH1	D11	1.12115	9.53242	0
JAG1-NOTCH1	D13	1.45802	13.2093	0
JAG1-NOTCH1	D15	1.2603	4.76711	0.0001
JAG1-NOTCH2	D3	0.603188	-10.9154	1
JAG1-NOTCH2	D5	1.68323	0.948566	0.171
JAG1-NOTCH2	D7	2.40107	9.02239	0
JAG1-NOTCH2	D9	2.12108	6.27337	0
JAG1-NOTCH2	D11	1.59898	0.153982	0.4298
JAG1-NOTCH2	D13	2.29376	5.05865	0
JAG1-NOTCH2	D15	1.65863	0.228409	0.4
JAG1-NOTCH3	D3	0.150455	-14.0269	1
JAG1-NOTCH3	D5	0.649659	-6.84862	1
JAG1-NOTCH3	D7	1.35824	0.757373	0.2207
JAG1-NOTCH3	D9	1.66953	4.85346	0
JAG1-NOTCH3	D11	2.15416	10.1675	0
[truncated: 331 more rows]

## Sheet: Table S9
Table S9. Data from Figure 3G and Extended Data Figure S3F.
[truncated: 84 more rows]
